# Supplementary material for: The Cardiac Acetyl-Lysine Proteome
Source: PLoS One. 2013 Jul 2;8(7):e67513. doi: 10.1371/journal.pone.0067513 (PMC3699649; doi:10.1371/journal.pone.0067513)
Supplement: Table S1 — PTM Count & Site Probability, Spectrum Report, Peptide Report. Sheet 1 shows the sites of acetylation, the statistical probability that the acetyl group can be assigned to a specific lysine residue (in lower case k), and the the number of times that a site was identified in each of 24 LC-MS/MS runs. Sheet 2 provides spectrum data obtained for all acetylated peptides. Sheet 3 includes the data for all peptides, including unacetylated peptides that also eluted from the immunocapture resin. Sheet 4 shows the acetylated peptides in which the site of acetylation (k) lies N-terminally adjacent to serine. (XLSX) [file pone.0067513.s001.xlsx]

## Sheet: PTM Count
Protein Accession	Protein Name	Site	Modification	Best Ascore	Localization Probability	File Name: S_2-1.raw (F0570...	File Name: S_2-2.raw (F0574...	File Name: S_1-1.raw (F0570...	File Name: S_1-2.raw (F0574...	File Name: S_3-1.raw (F0571...	File Name: S_3-2.raw (F0574...	File Name: S_4-1.raw (F0571...	File Name: S_4-2.raw (F0574...	File Name: S_7-1.raw (F0571...	File Name: S_7-2.raw (F0574...	File Name: S_6-1.raw (F0571...	File Name: S_6-2.raw (F0574...	File Name: S_5-1.raw (F0571...	File Name: S_5-2.raw (F0574...	File Name: S_8-1.raw (F0571...	File Name: S_8-2.raw (F0574...	File Name: S_11-1.raw (F057...	File Name: S_11-2.raw (F057...	File Name: S_10-1.raw (F057...	File Name: S_10-2.raw (F057...	File Name: S_9-1.raw (F0571...	File Name: S_9-2.raw (F0574...	File Name: S_12-1.raw (F057...	File Name: S_12-2.raw (F057...
ENSCPOP00000000012	pep:novel scaffold:cavPor3:scaffold_20:18244261:18266481:-1 gene:ENSCPOG00000000015 transcript:ENSCPOT00000000015	K127	Acetylation	100% (1,000.00)	1	1	0	0	0	0	0	0	0	0	0	0	0	0	0	0	0	0	0	0	0	0	0	0	0
ENSCPOP00000000012	pep:novel scaffold:cavPor3:scaffold_20:18244261:18266481:-1 gene:ENSCPOG00000000015 transcript:ENSCPOT00000000015	K115	Acetylation	100% (1,000.00)	1	6	0	0	0	1	0	0	0	0	0	4	0	0	2	0	0	0	0	0	2	5	0	0	0
ENSCPOP00000000012	pep:novel scaffold:cavPor3:scaffold_20:18244261:18266481:-1 gene:ENSCPOG00000000015 transcript:ENSCPOT00000000015	K111	Acetylation	100% (74.79)	1	6	0	0	0	0	0	0	0	1	0	4	0	0	0	0	0	0	0	2	2	5	0	0	0
ENSCPOP00000000012	pep:novel scaffold:cavPor3:scaffold_20:18244261:18266481:-1 gene:ENSCPOG00000000015 transcript:ENSCPOT00000000015	K45	Acetylation	100% (98.72)	1	12	3	0	0	0	0	0	0	0	0	0	4	0	0	0	0	1	0	2	2	0	0	0	0
ENSCPOP00000000012	pep:novel scaffold:cavPor3:scaffold_20:18244261:18266481:-1 gene:ENSCPOG00000000015 transcript:ENSCPOT00000000015	K50	Acetylation	100% (65.81)	1	8	4	0	0	0	0	0	0	2	0	5	0	0	0	0	0	1	0	3	0	3	0	0	0
ENSCPOP00000000012	pep:novel scaffold:cavPor3:scaffold_20:18244261:18266481:-1 gene:ENSCPOG00000000015 transcript:ENSCPOT00000000015	K74	Acetylation	100% (225.81)	1	20	0	0	0	0	2	0	0	0	9	0	18	0	0	0	0	1	1	0	8	0	0	0	0
ENSCPOP00000000012	pep:novel scaffold:cavPor3:scaffold_20:18244261:18266481:-1 gene:ENSCPOG00000000015 transcript:ENSCPOT00000000015	K53	Acetylation	100% (1,000.00)	1	15	0	14	0	6	0	0	0	6	0	6	1	0	0	0	0	1	0	9	0	16	0	0	0
ENSCPOP00000000062	pep:novel scaffold:cavPor3:scaffold_0:55316584:55330701:1 gene:ENSCPOG00000000072 transcript:ENSCPOT00000000072	K288	Acetylation	100% (1,000.00)	1	0	0	0	0	0	0	0	0	2	0	0	0	0	0	0	0	1	0	0	0	0	0	0	0
ENSCPOP00000000178	pep:novel scaffold:cavPor3:scaffold_18:27997608:28094859:-1 gene:ENSCPOG00000000204 transcript:ENSCPOT00000000207	K296	Acetylation	100% (52.15)	1	0	0	0	0	0	0	0	0	0	0	0	0	0	0	0	0	0	0	1	0	0	0	0	0
ENSCPOP00000000235	pep:known scaffold:cavPor3:scaffold_4:20169103:20169845:1 gene:ENSCPOG00000000267 transcript:ENSCPOT00000000270	K12	Acetylation	100% (67.97)	1	0	0	0	0	6	0	0	0	0	0	0	0	0	0	0	0	2	0	0	0	0	0	0	0
ENSCPOP00000000235	pep:known scaffold:cavPor3:scaffold_4:20169103:20169845:1 gene:ENSCPOG00000000267 transcript:ENSCPOT00000000270	K17	Acetylation	100% (1,000.00)	1	0	0	0	0	2	0	0	0	6	0	0	0	0	0	0	0	1	0	0	0	0	0	0	0
ENSCPOP00000000235	pep:known scaffold:cavPor3:scaffold_4:20169103:20169845:1 gene:ENSCPOG00000000267 transcript:ENSCPOT00000000270	K8	Acetylation	100% (68.07)	1	0	0	0	0	0	2	0	0	3	3	0	0	0	0	0	0	0	1	0	0	0	0	0	0
ENSCPOP00000000366	pep:novel scaffold:cavPor3:scaffold_3:60137952:60141698:1 gene:ENSCPOG00000000415 transcript:ENSCPOT00000000418	K52	Acetylation	100% (197.81)	1	0	0	0	0	6	0	0	0	0	0	0	0	0	0	0	0	1	0	0	0	0	0	0	0
ENSCPOP00000000366	pep:novel scaffold:cavPor3:scaffold_3:60137952:60141698:1 gene:ENSCPOG00000000415 transcript:ENSCPOT00000000418	K11	Acetylation	100% (58.33)	1	0	0	0	0	8	2	0	0	3	3	0	0	0	0	0	0	1	1	0	0	0	0	0	0
ENSCPOP00000000631	pep:novel scaffold:cavPor3:scaffold_146:2060215:2070177:1 gene:ENSCPOG00000000710 transcript:ENSCPOT00000000715	K176	Acetylation	100% (1,000.00)	1	24	0	27	0	0	0	0	0	0	0	0	4	0	6	0	0	0	0	2	2	0	7	0	1
ENSCPOP00000000631	pep:novel scaffold:cavPor3:scaffold_146:2060215:2070177:1 gene:ENSCPOG00000000710 transcript:ENSCPOT00000000715	K192	Acetylation	100% (144.00)	1	16	4	24	6	0	0	4	2	0	0	5	5	7	7	0	0	0	0	3	3	9	8	0	1
ENSCPOP00000000631	pep:novel scaffold:cavPor3:scaffold_146:2060215:2070177:1 gene:ENSCPOG00000000710 transcript:ENSCPOT00000000715	K70	Acetylation	100% (67.08)	1	20	0	28	7	0	0	0	2	0	0	6	12	8	8	0	3	0	0	4	8	18	18	0	1
ENSCPOP00000000631	pep:novel scaffold:cavPor3:scaffold_146:2060215:2070177:1 gene:ENSCPOG00000000710 transcript:ENSCPOT00000000715	K54	Acetylation	100% (131.55)	1	52	4	46	15	0	0	10	2	0	0	22	17	10	12	3	3	0	0	11	11	25	22	1	2
ENSCPOP00000000631	pep:novel scaffold:cavPor3:scaffold_146:2060215:2070177:1 gene:ENSCPOG00000000710 transcript:ENSCPOT00000000715	K60	Acetylation	100% (1,000.00)	1	34	3	77	17	0	0	5	3	0	0	10	10	20	16	0	3	0	0	8	6	35	29	0	1
ENSCPOP00000000897	pep:novel scaffold:cavPor3:scaffold_4:45993765:45996883:1 gene:ENSCPOG00000000998 transcript:ENSCPOT00000001006	K192	Acetylation	100% (1,000.00)	1	0	0	0	0	0	0	0	0	0	0	0	0	0	0	0	0	0	0	0	0	0	1	0	0
ENSCPOP00000000897	pep:novel scaffold:cavPor3:scaffold_4:45993765:45996883:1 gene:ENSCPOG00000000998 transcript:ENSCPOT00000001006	K184	Acetylation	100% (78.79)	1	0	0	0	0	0	0	0	0	0	0	0	0	0	0	0	0	0	0	0	0	0	2	0	0
ENSCPOP00000000951	pep:novel scaffold:cavPor3:scaffold_120:1613987:1621123:-1 gene:ENSCPOG00000001054 transcript:ENSCPOT00000001064	K367	Acetylation	100% (1,000.00)	1	0	0	0	0	0	0	0	0	0	2	0	0	0	0	0	0	0	0	0	0	0	0	0	0
ENSCPOP00000000951	pep:novel scaffold:cavPor3:scaffold_120:1613987:1621123:-1 gene:ENSCPOG00000001054 transcript:ENSCPOT00000001064	K162	Acetylation	100% (1,000.00)	1	0	0	0	0	0	1	0	0	0	2	0	0	0	0	0	0	0	0	0	0	0	0	0	0
ENSCPOP00000000963	pep:novel scaffold:cavPor3:scaffold_47:14288037:14408362:1 gene:ENSCPOG00000001066 transcript:ENSCPOT00000001077	K21	Acetylation	100% (41.62)	1	0	0	0	0	0	0	0	0	0	0	0	0	0	0	0	0	0	0	1	0	0	0	0	0
ENSCPOP00000001164	pep:novel scaffold:cavPor3:scaffold_44:8767055:8784056:1 gene:ENSCPOG00000001285 transcript:ENSCPOT00000001301	K263	Acetylation	100% (1,000.00)	1	0	0	0	0	1	0	0	0	0	0	0	0	0	0	0	0	0	0	0	0	0	0	0	0
ENSCPOP00000001378	pep:known scaffold:cavPor3:scaffold_71:5337899:5339176:1 gene:ENSCPOG00000001523 transcript:ENSCPOT00000001543	K77	Acetylation	100% (90.56)	1	0	0	0	0	2	0	0	0	0	0	0	0	0	0	0	0	1	0	0	0	0	0	0	0
ENSCPOP00000001378	pep:known scaffold:cavPor3:scaffold_71:5337899:5339176:1 gene:ENSCPOG00000001523 transcript:ENSCPOT00000001543	K67	Acetylation	100% (68.63)	1	0	0	0	0	0	0	0	0	0	2	0	0	0	0	0	1	0	2	0	0	0	0	0	0
ENSCPOP00000001378	pep:known scaffold:cavPor3:scaffold_71:5337899:5339176:1 gene:ENSCPOG00000001523 transcript:ENSCPOT00000001543	K9	Acetylation	100% (161.45)	1	0	0	0	0	2	0	0	0	6	0	0	0	0	0	0	0	1	0	0	0	0	0	0	0
ENSCPOP00000001378	pep:known scaffold:cavPor3:scaffold_71:5337899:5339176:1 gene:ENSCPOG00000001523 transcript:ENSCPOT00000001543	K88	Acetylation	100% (142.14)	1	0	0	0	0	8	0	0	0	7	3	0	0	0	0	0	0	2	2	0	0	0	0	0	0
ENSCPOP00000001378	pep:known scaffold:cavPor3:scaffold_71:5337899:5339176:1 gene:ENSCPOG00000001523 transcript:ENSCPOT00000001543	K45	Acetylation	100% (133.26)	1	0	0	0	0	10	4	0	0	3	3	0	0	0	0	0	0	1	2	0	0	4	4	0	0
ENSCPOP00000001378	pep:known scaffold:cavPor3:scaffold_71:5337899:5339176:1 gene:ENSCPOG00000001523 transcript:ENSCPOT00000001543	K96	Acetylation	100% (1,000.00)	1	0	0	0	0	8	4	0	0	3	9	0	0	0	0	0	0	0	2	0	0	0	8	0	0
ENSCPOP00000001378	pep:known scaffold:cavPor3:scaffold_71:5337899:5339176:1 gene:ENSCPOG00000001523 transcript:ENSCPOT00000001543	K145	Acetylation	100% (1,000.00)	1	0	0	0	0	8	4	0	0	6	3	0	0	4	0	0	0	2	1	0	0	5	5	0	0
ENSCPOP00000001378	pep:known scaffold:cavPor3:scaffold_71:5337899:5339176:1 gene:ENSCPOG00000001523 transcript:ENSCPOT00000001543	K83	Acetylation	100% (108.18)	1	32	0	54	0	16	6	15	5	9	9	0	0	20	0	6	0	3	4	7	7	12	0	4	4
ENSCPOP00000001412	pep:novel scaffold:cavPor3:scaffold_98:1875067:1888666:1 gene:ENSCPOG00000001563 transcript:ENSCPOT00000001583	K77	Acetylation	100% (90.42)	1	0	0	0	0	0	0	0	0	0	0	0	0	0	0	0	0	0	0	0	0	2	0	0	0
ENSCPOP00000001412	pep:novel scaffold:cavPor3:scaffold_98:1875067:1888666:1 gene:ENSCPOG00000001563 transcript:ENSCPOT00000001583	K343	Acetylation	100% (88.23)	1	0	0	0	0	0	1	0	0	0	0	0	0	0	0	0	0	0	0	0	0	2	0	0	0
ENSCPOP00000001412	pep:novel scaffold:cavPor3:scaffold_98:1875067:1888666:1 gene:ENSCPOG00000001563 transcript:ENSCPOT00000001583	K100	Acetylation	100% (1,000.00)	1	1	0	2	0	0	0	0	0	0	0	0	0	0	0	0	0	0	0	0	0	0	0	0	0
ENSCPOP00000001412	pep:novel scaffold:cavPor3:scaffold_98:1875067:1888666:1 gene:ENSCPOG00000001563 transcript:ENSCPOT00000001583	K58	Acetylation	100% (1,000.00)	1	0	0	0	0	8	0	0	0	0	0	4	0	0	0	0	0	1	0	3	0	0	0	0	0
ENSCPOP00000001424	pep:novel scaffold:cavPor3:scaffold_8:30902087:30958307:1 gene:ENSCPOG00000001577 transcript:ENSCPOT00000001597	K641	Acetylation	100% (1,000.00)	1	0	0	0	0	0	1	0	0	0	0	0	0	0	0	0	0	0	0	0	0	0	0	0	0
ENSCPOP00000001659	pep:novel scaffold:cavPor3:scaffold_76:6266190:6267280:-1 gene:ENSCPOG00000001832 transcript:ENSCPOT00000001853	K178	Acetylation	100% (1,000.00)	1	0	0	0	0	0	2	0	0	0	0	0	0	0	0	0	0	0	1	0	0	0	0	0	0
ENSCPOP00000001659	pep:novel scaffold:cavPor3:scaffold_76:6266190:6267280:-1 gene:ENSCPOG00000001832 transcript:ENSCPOT00000001853	K141	Acetylation	100% (1,000.00)	1	0	0	0	0	0	2	0	0	0	0	0	0	0	0	0	0	0	2	0	0	0	0	0	0
ENSCPOP00000001717	pep:novel scaffold:cavPor3:scaffold_218:190762:197578:-1 gene:ENSCPOG00000001899 transcript:ENSCPOT00000001920	K321	Acetylation	100% (1,000.00)	1	0	0	0	0	0	2	0	0	0	3	0	0	0	0	0	0	1	1	0	0	0	0	0	0
ENSCPOP00000001864	pep:novel scaffold:cavPor3:scaffold_4:22325663:22342496:-1 gene:ENSCPOG00000002059 transcript:ENSCPOT00000002086	K271	Acetylation	100% (1,000.00)	1	2	0	0	0	0	0	0	0	0	0	0	2	2	5	0	0	0	0	0	1	3	3	0	0
ENSCPOP00000001864	pep:novel scaffold:cavPor3:scaffold_4:22325663:22342496:-1 gene:ENSCPOG00000002059 transcript:ENSCPOT00000002086	K92	Acetylation	100% (1,000.00)	1	4	0	0	0	0	0	0	0	0	0	0	3	4	4	0	0	0	0	0	1	5	5	0	0
ENSCPOP00000001873	pep:novel scaffold:cavPor3:scaffold_56:4476537:4480571:1 gene:ENSCPOG00000002069 transcript:ENSCPOT00000002096	K46	Acetylation	100% (1,000.00)	1	3	0	14	0	0	0	0	0	0	0	0	0	0	0	0	0	0	0	0	0	1	0	0	0
ENSCPOP00000001880	pep:known scaffold:cavPor3:scaffold_10:20672255:20676454:-1 gene:ENSCPOG00000002077 transcript:ENSCPOT00000002104	K330	Acetylation	100% (1,000.00)	1	0	0	0	0	1	0	0	0	0	0	0	0	0	0	0	0	0	0	0	0	0	0	0	0
ENSCPOP00000001880	pep:known scaffold:cavPor3:scaffold_10:20672255:20676454:-1 gene:ENSCPOG00000002077 transcript:ENSCPOT00000002104	K317	Acetylation	100% (153.19)	1	0	0	0	0	0	0	0	0	0	0	0	0	0	2	0	0	0	0	0	0	0	0	0	0
ENSCPOP00000001880	pep:known scaffold:cavPor3:scaffold_10:20672255:20676454:-1 gene:ENSCPOG00000002077 transcript:ENSCPOT00000002104	K63	Acetylation	100% (1,000.00)	1	0	0	0	0	8	0	0	0	3	3	0	4	5	6	0	0	3	1	0	0	12	6	0	0
ENSCPOP00000001880	pep:known scaffold:cavPor3:scaffold_10:20672255:20676454:-1 gene:ENSCPOG00000002077 transcript:ENSCPOT00000002104	K52	Acetylation	100% (169.77)	1	30	0	0	0	0	4	0	0	0	3	0	21	16	26	0	0	0	3	0	15	1	18	0	8
ENSCPOP00000002037	pep:novel scaffold:cavPor3:scaffold_11:44627074:44637529:-1 gene:ENSCPOG00000002246 transcript:ENSCPOT00000002278	K40	Acetylation	100% (1,000.00)	1	0	0	1	0	0	0	0	0	0	0	0	0	0	0	0	0	0	0	0	0	0	0	0	0
ENSCPOP00000002046	pep:novel scaffold:cavPor3:scaffold_29:13436911:13515990:-1 gene:ENSCPOG00000002255 transcript:ENSCPOT00000002287	K84	Acetylation	100% (92.90)	1	0	0	1	0	0	0	0	0	0	0	0	0	0	0	0	0	0	0	0	0	0	0	0	0
ENSCPOP00000002046	pep:novel scaffold:cavPor3:scaffold_29:13436911:13515990:-1 gene:ENSCPOG00000002255 transcript:ENSCPOT00000002287	K229	Acetylation	100% (147.67)	1	2	0	0	0	0	0	0	0	0	0	0	0	0	0	0	0	0	0	0	0	0	0	0	0
ENSCPOP00000002046	pep:novel scaffold:cavPor3:scaffold_29:13436911:13515990:-1 gene:ENSCPOG00000002255 transcript:ENSCPOT00000002287	K294	Acetylation	100% (155.64)	1	0	0	0	0	0	0	0	0	0	0	0	2	0	0	0	0	0	0	0	1	0	0	0	0
ENSCPOP00000002046	pep:novel scaffold:cavPor3:scaffold_29:13436911:13515990:-1 gene:ENSCPOG00000002255 transcript:ENSCPOT00000002287	K63	Acetylation	100% (99.83)	1	10	6	4	0	0	0	0	0	0	0	3	0	5	0	0	0	0	0	2	0	0	0	0	0
ENSCPOP00000002046	pep:novel scaffold:cavPor3:scaffold_29:13436911:13515990:-1 gene:ENSCPOG00000002255 transcript:ENSCPOT00000002287	K397	Acetylation	100% (125.59)	1	14	0	0	0	0	0	5	0	0	0	4	7	0	0	0	0	0	0	2	1	0	0	0	0
ENSCPOP00000002046	pep:novel scaffold:cavPor3:scaffold_29:13436911:13515990:-1 gene:ENSCPOG00000002255 transcript:ENSCPOT00000002287	K117	Acetylation	100% (204.62)	1	18	3	0	0	0	0	1	0	0	0	4	0	10	0	0	0	0	0	2	0	6	0	0	0
ENSCPOP00000002046	pep:novel scaffold:cavPor3:scaffold_29:13436911:13515990:-1 gene:ENSCPOG00000002255 transcript:ENSCPOT00000002287	K403	Acetylation	100% (114.49)	1	20	0	0	0	0	0	6	0	0	0	6	6	0	0	3	3	0	0	4	4	0	0	1	2
ENSCPOP00000002046	pep:novel scaffold:cavPor3:scaffold_29:13436911:13515990:-1 gene:ENSCPOG00000002255 transcript:ENSCPOT00000002287	K331	Acetylation	100% (155.20)	1	39	12	15	10	0	0	0	2	0	0	2	10	6	6	0	0	0	0	6	5	7	10	0	0
ENSCPOP00000002046	pep:novel scaffold:cavPor3:scaffold_29:13436911:13515990:-1 gene:ENSCPOG00000002255 transcript:ENSCPOT00000002287	K394	Acetylation	100% (59.79)	1	23	9	41	10	0	0	6	0	0	0	4	0	12	0	0	0	0	0	4	2	11	18	0	0
ENSCPOP00000002046	pep:novel scaffold:cavPor3:scaffold_29:13436911:13515990:-1 gene:ENSCPOG00000002255 transcript:ENSCPOT00000002287	K70	Acetylation	100% (1,000.00)	1	40	10	49	14	0	0	6	4	0	0	18	12	17	12	3	3	0	0	8	12	20	27	1	1
ENSCPOP00000002046	pep:novel scaffold:cavPor3:scaffold_29:13436911:13515990:-1 gene:ENSCPOG00000002255 transcript:ENSCPOT00000002287	K100	Acetylation	100% (1,000.00)	1	60	10	47	14	0	0	13	4	0	0	18	24	29	8	6	3	0	0	24	22	162	99	1	1
ENSCPOP00000002086	pep:novel scaffold:cavPor3:scaffold_76:6482886:6497275:-1 gene:ENSCPOG00000002297 transcript:ENSCPOT00000002329	K959	Acetylation	100% (119.85)	1	0	0	0	0	0	0	0	0	2	0	0	0	0	0	0	0	1	0	0	0	0	0	0	0
ENSCPOP00000002086	pep:novel scaffold:cavPor3:scaffold_76:6482886:6497275:-1 gene:ENSCPOG00000002297 transcript:ENSCPOT00000002329	K70	Acetylation	100% (1,000.00)	1	0	0	0	0	0	0	0	0	2	0	0	0	0	0	0	0	0	1	0	0	0	0	0	0
ENSCPOP00000002099	pep:novel scaffold:cavPor3:scaffold_47:10520993:10533007:-1 gene:ENSCPOG00000002312 transcript:ENSCPOT00000002344	K146	Acetylation	100% (1,000.00)	1	0	0	0	0	0	0	0	0	0	0	0	0	0	0	0	0	0	0	0	0	6	2	0	0
ENSCPOP00000002148	pep:novel scaffold:cavPor3:scaffold_6:963339:978817:-1 gene:ENSCPOG00000002363 transcript:ENSCPOT00000002396	K75	Acetylation	100% (1,000.00)	1	0	0	0	0	0	0	0	0	0	0	0	2	0	0	0	0	0	1	0	0	0	0	0	0
ENSCPOP00000002148	pep:novel scaffold:cavPor3:scaffold_6:963339:978817:-1 gene:ENSCPOG00000002363 transcript:ENSCPOT00000002396	K611	Acetylation	100% (131.88)	1	0	0	0	0	0	0	0	0	0	0	0	2	0	0	0	0	0	0	0	1	0	0	0	0
ENSCPOP00000002148	pep:novel scaffold:cavPor3:scaffold_6:963339:978817:-1 gene:ENSCPOG00000002363 transcript:ENSCPOT00000002396	K344	Acetylation	100% (1,000.00)	1	0	0	0	0	2	0	0	0	0	0	0	0	0	0	0	0	1	0	3	0	0	0	0	0
ENSCPOP00000002148	pep:novel scaffold:cavPor3:scaffold_6:963339:978817:-1 gene:ENSCPOG00000002363 transcript:ENSCPOT00000002396	K359	Acetylation	100% (1,000.00)	1	12	6	12	8	0	0	0	0	0	0	0	3	10	5	0	0	0	0	1	0	12	12	0	0
ENSCPOP00000002148	pep:novel scaffold:cavPor3:scaffold_6:963339:978817:-1 gene:ENSCPOG00000002363 transcript:ENSCPOT00000002396	K599	Acetylation	100% (160.18)	1	40	0	0	0	0	4	0	0	4	6	10	12	0	0	0	0	1	3	4	11	0	0	0	0
ENSCPOP00000002148	pep:novel scaffold:cavPor3:scaffold_6:963339:978817:-1 gene:ENSCPOG00000002363 transcript:ENSCPOT00000002396	K287	Acetylation	100% (89.69)	1	42	0	19	8	2	2	4	0	3	3	0	21	4	0	0	0	2	1	10	15	3	0	0	0
ENSCPOP00000002148	pep:novel scaffold:cavPor3:scaffold_6:963339:978817:-1 gene:ENSCPOG00000002363 transcript:ENSCPOT00000002396	K299	Acetylation	100% (1,000.00)	1	59	18	44	8	8	2	0	8	3	3	7	7	7	9	0	0	3	1	13	14	18	20	0	0
ENSCPOP00000002148	pep:novel scaffold:cavPor3:scaffold_6:963339:978817:-1 gene:ENSCPOG00000002363 transcript:ENSCPOT00000002396	K134	Acetylation	100% (83.89)	1	70	0	106	18	6	2	10	0	11	0	8	24	35	26	0	0	4	1	18	24	17	17	0	4
ENSCPOP00000002161	pep:novel scaffold:cavPor3:scaffold_38:420506:451489:1 gene:ENSCPOG00000002377 transcript:ENSCPOT00000002410	K134	Acetylation	100% (58.33)	1	0	0	2	0	0	0	0	0	0	0	0	0	0	0	0	0	0	0	0	0	0	0	0	0
ENSCPOP00000002163	pep:novel scaffold:cavPor3:scaffold_35:2144216:2160932:1 gene:ENSCPOG00000002379 transcript:ENSCPOT00000002412	K66	Acetylation	100% (103.21)	1	0	0	0	0	0	0	0	0	2	2	0	0	0	0	0	0	0	2	0	0	0	0	0	0
ENSCPOP00000002376	pep:novel scaffold:cavPor3:scaffold_9:46900000:46907434:1 gene:ENSCPOG00000002615 transcript:ENSCPOT00000002649	K187	Acetylation	100% (1,000.00)	1	0	0	0	0	0	0	0	1	0	0	0	0	0	0	0	0	0	0	0	0	0	0	0	0
ENSCPOP00000002376	pep:novel scaffold:cavPor3:scaffold_9:46900000:46907434:1 gene:ENSCPOG00000002615 transcript:ENSCPOT00000002649	K110	Acetylation	100% (1,000.00)	1	0	0	0	0	1	1	0	3	0	0	0	0	0	0	0	0	0	0	0	0	0	0	2	0
ENSCPOP00000002392	pep:known scaffold:cavPor3:scaffold_66:2406002:2408736:-1 gene:ENSCPOG00000002632 transcript:ENSCPOT00000002666	K132	Acetylation	100% (40.71)	1	0	0	0	0	4	0	0	0	3	0	0	0	0	0	0	0	1	1	0	0	0	0	0	0
ENSCPOP00000002392	pep:known scaffold:cavPor3:scaffold_66:2406002:2408736:-1 gene:ENSCPOG00000002632 transcript:ENSCPOT00000002666	K77	Acetylation	100% (114.50)	1	0	0	0	0	10	6	0	0	3	6	0	0	0	0	10	0	4	1	0	0	0	0	4	4
ENSCPOP00000002482	pep:novel scaffold:cavPor3:scaffold_24:2027391:2029063:-1 gene:ENSCPOG00000002733 transcript:ENSCPOT00000002767	K57	Acetylation	100% (125.30)	1	1	0	2	0	0	0	0	0	0	0	0	0	0	0	0	0	0	0	0	0	0	3	0	0
ENSCPOP00000002482	pep:novel scaffold:cavPor3:scaffold_24:2027391:2029063:-1 gene:ENSCPOG00000002733 transcript:ENSCPOT00000002767	K74	Acetylation	100% (158.90)	1	12	0	6	4	0	0	0	0	0	0	3	6	3	3	0	0	0	0	1	1	8	12	0	0
ENSCPOP00000002482	pep:novel scaffold:cavPor3:scaffold_24:2027391:2029063:-1 gene:ENSCPOG00000002733 transcript:ENSCPOT00000002767	K121	Acetylation	100% (1,000.00)	1	14	0	17	0	0	0	0	0	0	0	0	3	0	5	0	0	0	0	3	3	22	28	0	0
ENSCPOP00000002485	pep:novel scaffold:cavPor3:scaffold_5:24468474:24685345:-1 gene:ENSCPOG00000002735 transcript:ENSCPOT00000002770	K149	Acetylation	100% (60.76)	1	0	0	0	0	1	0	0	0	0	0	0	0	0	0	0	0	0	0	0	0	0	0	0	0
ENSCPOP00000002487	pep:novel scaffold:cavPor3:scaffold_115:1976162:2030121:1 gene:ENSCPOG00000002739 transcript:ENSCPOT00000002774	K533	Acetylation	100% (61.87)	1	0	0	0	0	0	0	0	1	0	0	0	0	0	0	0	0	0	0	0	0	0	0	0	0
ENSCPOP00000002487	pep:novel scaffold:cavPor3:scaffold_115:1976162:2030121:1 gene:ENSCPOG00000002739 transcript:ENSCPOT00000002774	K464	Acetylation	100% (1,000.00)	1	2	0	0	0	0	0	0	0	0	0	0	0	0	0	0	0	0	0	0	0	0	0	0	1
ENSCPOP00000002499	pep:novel scaffold:cavPor3:scaffold_15:23732017:23745973:1 gene:ENSCPOG00000002752 transcript:ENSCPOT00000002787	K31	Acetylation	100% (155.64)	1	12	0	0	0	0	0	0	0	0	0	0	0	0	0	2	0	0	0	3	0	0	5	1	0
ENSCPOP00000002499	pep:novel scaffold:cavPor3:scaffold_15:23732017:23745973:1 gene:ENSCPOG00000002752 transcript:ENSCPOT00000002787	K74	Acetylation	100% (250.73)	1	12	0	0	0	0	0	3	0	0	0	5	0	0	0	2	0	0	0	3	0	0	0	0	0
ENSCPOP00000002669	pep:novel scaffold:cavPor3:scaffold_132:641754:644280:-1 gene:ENSCPOG00000002938 transcript:ENSCPOT00000002975	K68	Acetylation	100% (83.09)	1	0	0	14	0	0	0	0	0	0	0	2	0	0	0	0	0	0	0	0	0	10	0	0	0
ENSCPOP00000002733	pep:novel scaffold:cavPor3:scaffold_37:5976417:6004088:1 gene:ENSCPOG00000003017 transcript:ENSCPOT00000003056	K93	Acetylation	100% (77.38)	1	1	0	2	0	0	0	0	0	0	0	0	0	0	0	0	0	0	0	0	0	0	0	0	0
ENSCPOP00000002733	pep:novel scaffold:cavPor3:scaffold_37:5976417:6004088:1 gene:ENSCPOG00000003017 transcript:ENSCPOT00000003056	K66	Acetylation	100% (1,000.00)	1	0	0	0	0	0	0	0	0	0	0	0	3	8	4	0	0	1	1	2	2	5	0	0	0
ENSCPOP00000002733	pep:novel scaffold:cavPor3:scaffold_37:5976417:6004088:1 gene:ENSCPOG00000003017 transcript:ENSCPOT00000003056	K57	Acetylation	100% (201.24)	1	25	0	8	0	6	0	0	5	3	3	8	11	0	0	0	0	2	1	6	6	0	0	0	4
ENSCPOP00000002733	pep:novel scaffold:cavPor3:scaffold_37:5976417:6004088:1 gene:ENSCPOG00000003017 transcript:ENSCPOT00000003056	K48	Acetylation	100% (154.74)	1	24	0	10	10	4	0	5	0	0	3	0	9	11	0	6	0	1	1	7	7	12	12	4	0
ENSCPOP00000002733	pep:novel scaffold:cavPor3:scaffold_37:5976417:6004088:1 gene:ENSCPOG00000003017 transcript:ENSCPOT00000003056	K54	Acetylation	100% (52.15)	1	82	0	100	0	14	6	4	5	9	12	64	32	29	20	6	0	4	3	24	31	34	54	4	4
ENSCPOP00000002782	pep:known scaffold:cavPor3:scaffold_47:631721:647024:-1 gene:ENSCPOG00000003072 transcript:ENSCPOT00000003114	K453	Acetylation	100% (56.50)	1	0	0	0	0	1	0	0	0	0	0	0	0	0	0	0	0	0	0	0	0	0	0	0	0
ENSCPOP00000002782	pep:known scaffold:cavPor3:scaffold_47:631721:647024:-1 gene:ENSCPOG00000003072 transcript:ENSCPOT00000003114	K421	Acetylation	100% (1,000.00)	1	0	0	0	0	1	0	0	0	0	0	0	0	0	0	0	0	0	0	0	0	0	0	0	0
ENSCPOP00000002782	pep:known scaffold:cavPor3:scaffold_47:631721:647024:-1 gene:ENSCPOG00000003072 transcript:ENSCPOT00000003114	K569	Acetylation	100% (143.52)	1	0	0	0	0	2	0	0	0	0	0	0	0	0	0	0	0	0	0	0	0	0	0	0	0
ENSCPOP00000002782	pep:known scaffold:cavPor3:scaffold_47:631721:647024:-1 gene:ENSCPOG00000003072 transcript:ENSCPOT00000003114	K88	Acetylation	100% (1,000.00)	1	0	0	0	0	0	0	0	0	1	1	0	0	0	0	0	0	0	0	0	0	0	0	0	0
ENSCPOP00000002782	pep:known scaffold:cavPor3:scaffold_47:631721:647024:-1 gene:ENSCPOG00000003072 transcript:ENSCPOT00000003114	K246	Acetylation	100% (61.77)	1	0	0	0	0	0	1	0	0	0	2	0	0	0	0	0	0	0	0	0	0	0	0	0	0
ENSCPOP00000002782	pep:known scaffold:cavPor3:scaffold_47:631721:647024:-1 gene:ENSCPOG00000003072 transcript:ENSCPOT00000003114	K205	Acetylation	100% (70.53)	1	0	0	0	0	2	1	0	0	0	0	0	0	0	0	0	0	0	0	0	0	0	0	0	0
ENSCPOP00000002782	pep:known scaffold:cavPor3:scaffold_47:631721:647024:-1 gene:ENSCPOG00000003072 transcript:ENSCPOT00000003114	K490	Acetylation	100% (1,000.00)	1	0	0	0	0	1	0	0	0	0	2	0	0	0	0	0	0	0	0	0	0	0	0	0	0
ENSCPOP00000002782	pep:known scaffold:cavPor3:scaffold_47:631721:647024:-1 gene:ENSCPOG00000003072 transcript:ENSCPOT00000003114	K198	Acetylation	100% (88.35)	1	0	0	0	0	3	0	0	0	0	0	0	0	0	0	0	0	0	0	0	0	0	0	0	0
ENSCPOP00000002782	pep:known scaffold:cavPor3:scaffold_47:631721:647024:-1 gene:ENSCPOG00000003072 transcript:ENSCPOT00000003114	K130	Acetylation	100% (54.21)	1	0	0	0	0	1	0	0	0	2	0	0	0	0	0	0	0	0	0	0	0	0	0	0	0
ENSCPOP00000002782	pep:known scaffold:cavPor3:scaffold_47:631721:647024:-1 gene:ENSCPOG00000003072 transcript:ENSCPOT00000003114	K210	Acetylation	100% (52.75)	1	0	0	0	0	0	0	0	0	2	0	0	0	0	0	0	0	2	0	0	0	0	0	0	0
ENSCPOP00000002782	pep:known scaffold:cavPor3:scaffold_47:631721:647024:-1 gene:ENSCPOG00000003072 transcript:ENSCPOT00000003114	K65	Acetylation	100% (1,000.00)	1	0	0	0	0	0	0	0	0	2	1	0	0	0	0	0	0	1	0	0	0	0	0	0	0
ENSCPOP00000002782	pep:known scaffold:cavPor3:scaffold_47:631721:647024:-1 gene:ENSCPOG00000003072 transcript:ENSCPOT00000003114	K286	Acetylation	100% (63.37)	1	0	0	0	0	0	0	0	0	0	2	0	0	0	0	0	0	1	1	0	0	0	0	0	0
ENSCPOP00000002782	pep:known scaffold:cavPor3:scaffold_47:631721:647024:-1 gene:ENSCPOG00000003072 transcript:ENSCPOT00000003114	K380	Acetylation	100% (79.13)	1	0	0	0	0	3	0	0	0	2	2	0	0	0	0	0	0	0	0	0	0	0	0	0	0
ENSCPOP00000002782	pep:known scaffold:cavPor3:scaffold_47:631721:647024:-1 gene:ENSCPOG00000003072 transcript:ENSCPOT00000003114	K375	Acetylation	100% (99.80)	1	0	0	0	0	6	0	0	0	3	0	0	0	0	0	0	0	1	0	0	0	0	0	0	0
ENSCPOP00000002782	pep:known scaffold:cavPor3:scaffold_47:631721:647024:-1 gene:ENSCPOG00000003072 transcript:ENSCPOT00000003114	K236	Acetylation	100% (1,000.00)	1	0	0	0	0	6	0	0	0	3	0	0	0	0	0	0	0	1	0	0	0	0	0	0	0
ENSCPOP00000002782	pep:known scaffold:cavPor3:scaffold_47:631721:647024:-1 gene:ENSCPOG00000003072 transcript:ENSCPOT00000003114	K212	Acetylation	100% (1,000.00)	1	0	0	0	0	4	2	0	0	0	3	0	0	0	0	0	0	0	1	0	0	0	0	0	0
ENSCPOP00000002782	pep:known scaffold:cavPor3:scaffold_47:631721:647024:-1 gene:ENSCPOG00000003072 transcript:ENSCPOT00000003114	K229	Acetylation	100% (1,000.00)	1	0	0	0	0	2	0	0	0	3	3	0	0	0	0	0	0	2	1	0	0	0	0	0	0
ENSCPOP00000002782	pep:known scaffold:cavPor3:scaffold_47:631721:647024:-1 gene:ENSCPOG00000003072 transcript:ENSCPOT00000003114	K396	Acetylation	100% (1,000.00)	1	0	0	0	0	0	2	0	0	6	3	0	0	0	0	0	0	1	1	0	0	0	0	0	0
ENSCPOP00000002782	pep:known scaffold:cavPor3:scaffold_47:631721:647024:-1 gene:ENSCPOG00000003072 transcript:ENSCPOT00000003114	K383	Acetylation	100% (114.66)	1	0	0	0	0	6	2	0	0	3	3	0	0	0	0	0	0	0	1	0	0	0	0	0	0
ENSCPOP00000002782	pep:known scaffold:cavPor3:scaffold_47:631721:647024:-1 gene:ENSCPOG00000003072 transcript:ENSCPOT00000003114	K305	Acetylation	100% (114.22)	1	0	0	0	0	6	3	0	0	3	5	0	0	0	0	0	0	1	0	0	0	0	0	0	0
ENSCPOP00000002806	pep:novel scaffold:cavPor3:scaffold_92:3897135:3958678:-1 gene:ENSCPOG00000003099 transcript:ENSCPOT00000003142	K460	Acetylation	100% (1,000.00)	1	3	0	0	0	0	0	0	0	0	0	0	0	0	0	0	0	0	0	0	0	0	0	0	0
ENSCPOP00000002806	pep:novel scaffold:cavPor3:scaffold_92:3897135:3958678:-1 gene:ENSCPOG00000003099 transcript:ENSCPOT00000003142	K323	Acetylation	100% (57.61)	1	0	0	0	0	0	0	0	0	0	0	0	3	0	0	0	1	0	0	0	2	0	0	0	0
ENSCPOP00000002806	pep:novel scaffold:cavPor3:scaffold_92:3897135:3958678:-1 gene:ENSCPOG00000003099 transcript:ENSCPOT00000003142	K396	Acetylation	100% (125.71)	1	9	0	12	0	0	0	3	0	0	0	0	0	0	0	0	0	0	0	0	4	0	0	0	0
ENSCPOP00000002955	pep:novel scaffold:cavPor3:scaffold_0:56092696:56095526:1 gene:ENSCPOG00000003265 transcript:ENSCPOT00000003308	K43	Acetylation	100% (1,000.00)	1	0	0	0	0	0	0	0	0	1	0	0	0	0	0	0	0	0	0	0	0	0	0	0	0
ENSCPOP00000002972	pep:novel scaffold:cavPor3:scaffold_7:3441640:3460244:-1 gene:ENSCPOG00000003289 transcript:ENSCPOT00000003332	K75	Acetylation	100% (40.04)	1	0	0	0	0	2	0	0	0	0	0	0	0	0	0	0	0	0	0	0	0	0	0	0	0
ENSCPOP00000003038	pep:novel scaffold:cavPor3:scaffold_66:2440059:2494038:-1 gene:ENSCPOG00000003361 transcript:ENSCPOT00000003404	K276	Acetylation	100% (1,000.00)	1	0	0	0	0	1	0	2	0	0	0	0	0	0	0	0	0	0	0	0	0	0	0	0	0
ENSCPOP00000003038	pep:novel scaffold:cavPor3:scaffold_66:2440059:2494038:-1 gene:ENSCPOG00000003361 transcript:ENSCPOT00000003404	K970	Acetylation	100% (1,000.00)	1	30	0	0	0	0	0	6	0	0	0	7	7	8	0	0	4	0	2	5	5	9	0	0	4
ENSCPOP00000003406	pep:novel scaffold:cavPor3:scaffold_150:1140885:1148178:-1 gene:ENSCPOG00000003772 transcript:ENSCPOT00000003816	K41	Acetylation	100% (1,000.00)	1	6	0	0	0	0	0	0	0	0	0	0	6	0	0	0	0	0	0	2	1	8	0	0	0
ENSCPOP00000003406	pep:novel scaffold:cavPor3:scaffold_150:1140885:1148178:-1 gene:ENSCPOG00000003772 transcript:ENSCPOT00000003816	K112	Acetylation	100% (1,000.00)	1	12	0	8	0	0	0	0	0	0	0	0	3	0	0	0	0	0	0	1	1	2	5	0	0
ENSCPOP00000003507	pep:novel scaffold:cavPor3:scaffold_15:30616156:30620414:-1 gene:ENSCPOG00000003887 transcript:ENSCPOT00000003931	K371	Acetylation	100% (89.79)	1	0	0	0	0	0	0	0	0	2	2	0	0	0	0	0	0	2	0	0	0	0	0	0	0
ENSCPOP00000003507	pep:novel scaffold:cavPor3:scaffold_15:30616156:30620414:-1 gene:ENSCPOG00000003887 transcript:ENSCPOT00000003931	K374	Acetylation	100% (1,000.00)	1	0	0	0	0	2	2	0	0	3	0	0	0	0	0	0	0	1	1	0	0	0	0	0	0
ENSCPOP00000003526	pep:novel scaffold:cavPor3:scaffold_3:11859161:11992100:1 gene:ENSCPOG00000003907 transcript:ENSCPOT00000003951	K1853	Acetylation	100% (1,000.00)	1	0	0	0	0	0	0	1	0	0	0	0	0	0	0	0	0	0	0	0	0	0	0	0	0
ENSCPOP00000003526	pep:novel scaffold:cavPor3:scaffold_3:11859161:11992100:1 gene:ENSCPOG00000003907 transcript:ENSCPOT00000003951	K1864	Acetylation	100% (1,000.00)	1	0	0	0	0	0	0	1	0	0	0	0	0	0	0	0	0	0	0	0	0	0	0	0	0
ENSCPOP00000003526	pep:novel scaffold:cavPor3:scaffold_3:11859161:11992100:1 gene:ENSCPOG00000003907 transcript:ENSCPOT00000003951	K9775	Acetylation	100% (83.32)	1	0	0	0	0	0	0	0	0	0	0	0	0	1	0	0	0	0	0	0	0	0	0	0	0
ENSCPOP00000003526	pep:novel scaffold:cavPor3:scaffold_3:11859161:11992100:1 gene:ENSCPOG00000003907 transcript:ENSCPOT00000003951	K7965	Acetylation	100% (1,000.00)	1	0	0	0	0	0	0	0	0	0	0	0	0	0	0	0	0	0	0	0	0	1	0	0	0
ENSCPOP00000003526	pep:novel scaffold:cavPor3:scaffold_3:11859161:11992100:1 gene:ENSCPOG00000003907 transcript:ENSCPOT00000003951	K1760	Acetylation	100% (1,000.00)	1	0	0	0	0	0	0	0	0	0	0	0	0	0	0	0	0	0	0	0	0	1	0	0	0
ENSCPOP00000003559	pep:novel scaffold:cavPor3:scaffold_1:22436542:22446404:-1 gene:ENSCPOG00000003941 transcript:ENSCPOT00000003985	K230	Acetylation	100% (1,000.00)	1	0	0	0	0	0	0	0	0	0	0	0	0	0	0	0	0	0	0	0	0	1	0	0	0
ENSCPOP00000003559	pep:novel scaffold:cavPor3:scaffold_1:22436542:22446404:-1 gene:ENSCPOG00000003941 transcript:ENSCPOT00000003985	K344	Acetylation	100% (1,000.00)	1	10	0	14	0	0	0	4	0	0	0	0	6	8	8	3	3	0	0	0	4	0	0	0	1
ENSCPOP00000003559	pep:novel scaffold:cavPor3:scaffold_1:22436542:22446404:-1 gene:ENSCPOG00000003941 transcript:ENSCPOT00000003985	K276	Acetylation	100% (89.35)	1	35	0	9	0	0	0	15	5	0	0	0	8	10	0	0	6	0	0	5	0	13	25	4	5
ENSCPOP00000003618	pep:novel scaffold:cavPor3:scaffold_25:11029309:11082036:-1 gene:ENSCPOG00000004010 transcript:ENSCPOT00000004054	K130	Acetylation	100% (1,000.00)	1	0	0	0	0	2	2	0	0	2	0	0	0	0	0	0	0	0	0	0	0	0	0	0	0
ENSCPOP00000003628	pep:novel scaffold:cavPor3:scaffold_76:181419:184289:1 gene:ENSCPOG00000004022 transcript:ENSCPOT00000004066	K58	Acetylation	100% (106.66)	1	0	0	0	0	0	0	0	0	0	0	0	0	0	0	0	0	0	0	0	0	2	1	0	0
ENSCPOP00000003628	pep:novel scaffold:cavPor3:scaffold_76:181419:184289:1 gene:ENSCPOG00000004022 transcript:ENSCPOT00000004066	K43	Acetylation	100% (169.30)	1	0	0	4	0	0	0	0	0	0	0	0	0	0	0	0	0	0	0	0	0	2	0	0	0
ENSCPOP00000003628	pep:novel scaffold:cavPor3:scaffold_76:181419:184289:1 gene:ENSCPOG00000004022 transcript:ENSCPOT00000004066	K144	Acetylation	100% (1,000.00)	1	0	0	4	0	0	0	0	0	0	0	0	0	0	0	0	0	0	0	0	0	2	0	0	0
ENSCPOP00000003628	pep:novel scaffold:cavPor3:scaffold_76:181419:184289:1 gene:ENSCPOG00000004022 transcript:ENSCPOT00000004066	K68	Acetylation	100% (76.33)	1	3	0	2	0	0	0	0	0	0	0	0	0	2	0	0	0	0	0	0	1	1	1	0	0
ENSCPOP00000003628	pep:novel scaffold:cavPor3:scaffold_76:181419:184289:1 gene:ENSCPOG00000004022 transcript:ENSCPOT00000004066	K53	Acetylation	100% (75.35)	1	0	0	9	0	0	0	0	0	0	0	2	0	4	0	0	0	0	0	1	0	5	5	0	0
ENSCPOP00000003628	pep:novel scaffold:cavPor3:scaffold_76:181419:184289:1 gene:ENSCPOG00000004022 transcript:ENSCPOT00000004066	K104	Acetylation	100% (1,000.00)	1	8	2	16	0	0	0	0	0	0	0	3	3	5	5	0	0	0	0	1	1	6	6	0	0
ENSCPOP00000003628	pep:novel scaffold:cavPor3:scaffold_76:181419:184289:1 gene:ENSCPOG00000004022 transcript:ENSCPOT00000004066	K73	Acetylation	100% (132.30)	1	12	0	17	5	0	0	0	0	0	0	4	0	8	2	1	0	0	0	2	2	10	14	0	0
ENSCPOP00000003628	pep:novel scaffold:cavPor3:scaffold_76:181419:184289:1 gene:ENSCPOG00000004022 transcript:ENSCPOT00000004066	K80	Acetylation	100% (164.83)	1	24	6	35	8	2	0	9	0	0	0	9	11	9	13	8	4	0	0	7	5	24	32	2	2
ENSCPOP00000003628	pep:novel scaffold:cavPor3:scaffold_76:181419:184289:1 gene:ENSCPOG00000004022 transcript:ENSCPOT00000004066	K112	Acetylation	100% (103.54)	1	48	0	40	16	0	0	6	3	1	0	14	7	20	10	0	4	0	0	5	10	20	20	0	2
ENSCPOP00000003628	pep:novel scaffold:cavPor3:scaffold_76:181419:184289:1 gene:ENSCPOG00000004022 transcript:ENSCPOT00000004066	K90	Acetylation	100% (92.31)	1	56	20	71	18	1	0	10	2	0	0	15	10	13	16	0	0	0	0	10	12	44	55	0	1
ENSCPOP00000003760	pep:novel scaffold:cavPor3:scaffold_19:25400692:25403895:1 gene:ENSCPOG00000004169 transcript:ENSCPOT00000004214	K507	Acetylation	100% (1,000.00)	1	0	0	0	0	0	1	0	0	0	0	0	0	0	0	0	0	0	0	0	0	0	0	0	0
ENSCPOP00000003760	pep:novel scaffold:cavPor3:scaffold_19:25400692:25403895:1 gene:ENSCPOG00000004169 transcript:ENSCPOT00000004214	K56	Acetylation	100% (138.37)	1	0	0	0	0	1	4	0	0	0	3	0	0	0	0	0	0	0	1	0	0	0	0	0	0
ENSCPOP00000003780	pep:novel scaffold:cavPor3:scaffold_45:1694457:1741597:1 gene:ENSCPOG00000004192 transcript:ENSCPOT00000004237	K434	Acetylation	100% (109.64)	1	0	0	0	0	0	0	0	0	0	0	0	0	0	0	0	0	0	1	0	0	0	0	0	0
ENSCPOP00000003855	pep:novel scaffold:cavPor3:scaffold_8:23795660:23804749:-1 gene:ENSCPOG00000004273 transcript:ENSCPOT00000004318	K447	Acetylation	100% (1,000.00)	1	4	0	0	0	0	0	0	0	0	0	0	0	0	0	0	0	0	0	0	0	0	0	0	0
ENSCPOP00000003855	pep:novel scaffold:cavPor3:scaffold_8:23795660:23804749:-1 gene:ENSCPOG00000004273 transcript:ENSCPOT00000004318	K138	Acetylation	100% (81.42)	1	4	0	0	0	0	0	0	0	0	0	3	0	0	0	0	0	0	0	1	0	4	0	0	0
ENSCPOP00000003855	pep:novel scaffold:cavPor3:scaffold_8:23795660:23804749:-1 gene:ENSCPOG00000004273 transcript:ENSCPOT00000004318	K248	Acetylation	100% (1,000.00)	1	10	0	9	0	0	0	0	0	0	0	0	0	0	0	0	0	0	0	2	0	0	0	0	0
ENSCPOP00000003855	pep:novel scaffold:cavPor3:scaffold_8:23795660:23804749:-1 gene:ENSCPOG00000004273 transcript:ENSCPOT00000004318	K163	Acetylation	100% (1,000.00)	1	10	0	9	0	0	0	0	0	0	0	0	0	0	0	0	0	0	0	1	1	0	4	0	0
ENSCPOP00000003855	pep:novel scaffold:cavPor3:scaffold_8:23795660:23804749:-1 gene:ENSCPOG00000004273 transcript:ENSCPOT00000004318	K85	Acetylation	100% (103.57)	1	20	5	35	7	0	0	6	0	0	0	6	6	0	0	3	0	0	0	4	0	8	8	1	1
ENSCPOP00000003855	pep:novel scaffold:cavPor3:scaffold_8:23795660:23804749:-1 gene:ENSCPOG00000004273 transcript:ENSCPOT00000004318	K111	Acetylation	100% (1,000.00)	1	150	0	49	7	0	0	20	4	0	0	30	36	32	24	6	6	0	0	16	24	45	72	3	5
ENSCPOP00000004099	pep:novel scaffold:cavPor3:scaffold_22:24631501:24644577:-1 gene:ENSCPOG00000004549 transcript:ENSCPOT00000004598	K71	Acetylation	100% (1,000.00)	1	0	0	0	0	0	0	0	0	0	0	0	0	0	0	0	0	0	1	0	0	2	1	0	0
ENSCPOP00000004106	pep:novel scaffold:cavPor3:scaffold_66:3157470:3175899:1 gene:ENSCPOG00000004556 transcript:ENSCPOT00000004605	K74	Acetylation	100% (1,000.00)	1	0	0	0	0	0	0	0	0	0	0	0	0	0	0	0	0	0	0	0	0	2	0	0	0
ENSCPOP00000004119	pep:novel scaffold:cavPor3:scaffold_7:35044434:35064153:1 gene:ENSCPOG00000004569 transcript:ENSCPOT00000004618	K259	Acetylation	100% (1,000.00)	1	0	0	0	0	0	0	0	0	0	0	0	1	0	0	0	0	0	0	0	0	0	0	0	0
ENSCPOP00000004119	pep:novel scaffold:cavPor3:scaffold_7:35044434:35064153:1 gene:ENSCPOG00000004569 transcript:ENSCPOT00000004618	K357	Acetylation	100% (1,000.00)	1	6	0	0	0	0	0	0	0	0	0	0	3	0	0	0	0	0	0	1	1	0	0	0	0
ENSCPOP00000004119	pep:novel scaffold:cavPor3:scaffold_7:35044434:35064153:1 gene:ENSCPOG00000004569 transcript:ENSCPOT00000004618	K510	Acetylation	100% (57.67)	1	16	0	28	8	0	0	0	0	0	0	0	6	0	0	0	0	0	0	2	1	10	15	0	0
ENSCPOP00000004235	pep:novel scaffold:cavPor3:scaffold_52:7715794:7721305:1 gene:ENSCPOG00000004703 transcript:ENSCPOT00000004753	K46	Acetylation	100% (1,000.00)	1	0	0	1	1	0	0	0	0	0	0	0	0	0	0	0	0	0	0	0	0	0	2	0	0
ENSCPOP00000004235	pep:novel scaffold:cavPor3:scaffold_52:7715794:7721305:1 gene:ENSCPOG00000004703 transcript:ENSCPOT00000004753	K41	Acetylation	100% (89.35)	1	3	0	0	2	0	0	0	0	0	0	0	0	0	0	0	0	0	0	0	0	0	0	0	0
ENSCPOP00000004235	pep:novel scaffold:cavPor3:scaffold_52:7715794:7721305:1 gene:ENSCPOG00000004703 transcript:ENSCPOT00000004753	K94	Acetylation	100% (77.62)	1	1	0	9	4	0	0	0	0	0	0	0	0	0	0	0	0	0	0	0	0	3	3	0	0
ENSCPOP00000004235	pep:novel scaffold:cavPor3:scaffold_52:7715794:7721305:1 gene:ENSCPOG00000004703 transcript:ENSCPOT00000004753	K105	Acetylation	100% (122.13)	1	5	0	9	0	0	0	0	0	0	0	0	0	3	3	0	0	0	0	0	0	4	8	0	0
ENSCPOP00000004235	pep:novel scaffold:cavPor3:scaffold_52:7715794:7721305:1 gene:ENSCPOG00000004703 transcript:ENSCPOT00000004753	K99	Acetylation	100% (165.23)	1	14	0	34	10	0	0	0	0	0	0	0	0	13	11	0	0	0	0	0	0	22	21	0	0
ENSCPOP00000004239	pep:novel scaffold:cavPor3:scaffold_193:313917:314517:-1 gene:ENSCPOG00000004707 transcript:ENSCPOT00000004757	K80	Acetylation	100% (1,000.00)	1	0	0	1	0	0	0	0	0	0	0	0	0	0	0	0	0	0	0	0	0	0	2	0	0
ENSCPOP00000004239	pep:novel scaffold:cavPor3:scaffold_193:313917:314517:-1 gene:ENSCPOG00000004707 transcript:ENSCPOT00000004757	K28	Acetylation	100% (72.01)	1	0	0	0	0	0	0	0	0	0	0	0	0	0	0	0	0	1	0	0	0	2	4	0	0
ENSCPOP00000004239	pep:novel scaffold:cavPor3:scaffold_193:313917:314517:-1 gene:ENSCPOG00000004707 transcript:ENSCPOT00000004757	K15	Acetylation	100% (1,000.00)	1	20	0	24	0	0	0	0	0	0	0	0	5	7	0	0	2	0	1	0	3	0	8	0	0
ENSCPOP00000004239	pep:novel scaffold:cavPor3:scaffold_193:313917:314517:-1 gene:ENSCPOG00000004707 transcript:ENSCPOT00000004757	K10	Acetylation	100% (1,000.00)	1	20	0	24	0	0	0	0	0	0	0	0	5	7	0	0	2	0	1	0	3	0	8	0	0
ENSCPOP00000004239	pep:novel scaffold:cavPor3:scaffold_193:313917:314517:-1 gene:ENSCPOG00000004707 transcript:ENSCPOT00000004757	K19	Acetylation	100% (1,000.00)	1	40	0	63	14	0	0	0	0	4	0	12	12	24	16	0	3	1	1	0	8	27	28	0	0
ENSCPOP00000004239	pep:novel scaffold:cavPor3:scaffold_193:313917:314517:-1 gene:ENSCPOG00000004707 transcript:ENSCPOT00000004757	K24	Acetylation	100% (1,000.00)	1	46	0	80	14	0	0	0	0	4	0	12	12	27	16	0	3	1	1	0	9	27	37	0	0
ENSCPOP00000004266	pep:novel scaffold:cavPor3:scaffold_14:15735485:15768669:1 gene:ENSCPOG00000004734 transcript:ENSCPOT00000004784	K312	Acetylation	100% (88.62)	1	1	0	0	0	0	0	0	0	0	0	0	0	0	0	0	0	0	0	0	0	0	0	0	0
ENSCPOP00000004266	pep:novel scaffold:cavPor3:scaffold_14:15735485:15768669:1 gene:ENSCPOG00000004734 transcript:ENSCPOT00000004784	K38	Acetylation	100% (53.78)	1	3	0	4	0	1	0	0	0	0	0	0	0	0	0	0	0	0	0	4	0	0	0	0	0
ENSCPOP00000004266	pep:novel scaffold:cavPor3:scaffold_14:15735485:15768669:1 gene:ENSCPOG00000004734 transcript:ENSCPOT00000004784	K270	Acetylation	100% (1,000.00)	1	5	0	0	0	6	0	0	0	3	3	0	0	0	0	0	0	1	0	8	0	0	0	0	0
ENSCPOP00000004266	pep:novel scaffold:cavPor3:scaffold_14:15735485:15768669:1 gene:ENSCPOG00000004734 transcript:ENSCPOT00000004784	K340	Acetylation	100% (1,000.00)	1	2	0	24	0	0	0	0	0	0	0	3	0	5	10	0	0	0	0	0	1	0	6	0	0
ENSCPOP00000004266	pep:novel scaffold:cavPor3:scaffold_14:15735485:15768669:1 gene:ENSCPOG00000004734 transcript:ENSCPOT00000004784	K234	Acetylation	100% (95.35)	1	16	0	11	3	0	2	0	0	1	6	4	5	1	4	0	0	0	1	3	2	32	17	0	0
ENSCPOP00000004266	pep:novel scaffold:cavPor3:scaffold_14:15735485:15768669:1 gene:ENSCPOG00000004734 transcript:ENSCPOT00000004784	K25	Acetylation	100% (213.02)	1	51	0	26	0	16	0	0	0	0	3	0	0	0	0	0	0	2	4	0	4	17	24	0	0
ENSCPOP00000004266	pep:novel scaffold:cavPor3:scaffold_14:15735485:15768669:1 gene:ENSCPOG00000004734 transcript:ENSCPOT00000004784	K173	Acetylation	100% (1,000.00)	1	44	16	46	10	10	2	9	0	3	3	14	9	0	22	0	6	3	0	12	7	9	12	0	4
ENSCPOP00000004266	pep:novel scaffold:cavPor3:scaffold_14:15735485:15768669:1 gene:ENSCPOG00000004734 transcript:ENSCPOT00000004784	K81	Acetylation	100% (1,000.00)	1	56	7	72	9	10	6	5	0	6	3	16	8	10	10	0	0	2	1	12	6	22	22	4	4
ENSCPOP00000004266	pep:novel scaffold:cavPor3:scaffold_14:15735485:15768669:1 gene:ENSCPOG00000004734 transcript:ENSCPOT00000004784	K181	Acetylation	100% (1,000.00)	1	105	21	68	8	12	6	12	9	12	9	15	39	29	20	0	0	5	3	22	23	32	31	0	8
ENSCPOP00000004280	pep:novel scaffold:cavPor3:scaffold_0:24974944:25000060:-1 gene:ENSCPOG00000004748 transcript:ENSCPOT00000004799	K114	Acetylation	100% (1,000.00)	1	0	0	0	0	0	0	0	0	0	0	0	0	0	0	0	0	0	0	0	0	1	0	0	0
ENSCPOP00000004280	pep:novel scaffold:cavPor3:scaffold_0:24974944:25000060:-1 gene:ENSCPOG00000004748 transcript:ENSCPOT00000004799	K78	Acetylation	100% (142.94)	1	4	0	4	0	0	0	0	0	0	0	0	0	0	0	0	0	0	0	0	0	0	0	0	0
ENSCPOP00000004280	pep:novel scaffold:cavPor3:scaffold_0:24974944:25000060:-1 gene:ENSCPOG00000004748 transcript:ENSCPOT00000004799	K241	Acetylation	100% (1,000.00)	1	8	0	1	0	0	0	0	0	0	0	0	0	0	2	0	0	0	0	0	0	0	0	0	0
ENSCPOP00000004280	pep:novel scaffold:cavPor3:scaffold_0:24974944:25000060:-1 gene:ENSCPOG00000004748 transcript:ENSCPOT00000004799	K211	Acetylation	100% (1,000.00)	1	0	0	3	0	0	0	0	0	0	0	0	0	6	0	0	0	0	0	0	0	3	0	0	0
ENSCPOP00000004382	pep:known scaffold:cavPor3:scaffold_85:1756656:1785432:-1 gene:ENSCPOG00000004869 transcript:ENSCPOT00000004921	K90	Acetylation	100% (153.04)	1	0	0	0	0	2	1	0	0	0	0	0	0	0	0	0	0	0	0	0	0	0	0	0	0
ENSCPOP00000004489	pep:novel scaffold:cavPor3:scaffold_4:23698843:23800983:-1 gene:ENSCPOG00000004987 transcript:ENSCPOT00000005041	K1196	Acetylation	100% (71.50)	1	0	0	0	0	1	0	0	0	0	0	0	0	0	0	0	0	0	0	0	0	2	0	0	0
ENSCPOP00000004489	pep:novel scaffold:cavPor3:scaffold_4:23698843:23800983:-1 gene:ENSCPOG00000004987 transcript:ENSCPOT00000005041	K994	Acetylation	100% (1,000.00)	1	0	0	0	0	0	4	0	0	0	6	0	0	0	0	0	0	0	2	0	0	0	12	0	0
ENSCPOP00000004489	pep:novel scaffold:cavPor3:scaffold_4:23698843:23800983:-1 gene:ENSCPOG00000004987 transcript:ENSCPOT00000005041	K1551	Acetylation	100% (1,000.00)	1	0	0	0	0	2	4	0	8	0	3	0	0	0	10	0	0	0	2	0	0	12	12	0	0
ENSCPOP00000004489	pep:novel scaffold:cavPor3:scaffold_4:23698843:23800983:-1 gene:ENSCPOG00000004987 transcript:ENSCPOT00000005041	K1555	Acetylation	100% (1,000.00)	1	0	0	0	0	2	4	0	8	0	3	0	0	0	11	0	0	0	2	0	0	12	14	0	0
ENSCPOP00000004489	pep:novel scaffold:cavPor3:scaffold_4:23698843:23800983:-1 gene:ENSCPOG00000004987 transcript:ENSCPOT00000005041	K1557	Acetylation	100% (1,000.00)	1	0	0	0	0	2	4	0	8	0	3	0	0	0	11	0	0	0	2	0	0	12	14	0	0
ENSCPOP00000004489	pep:novel scaffold:cavPor3:scaffold_4:23698843:23800983:-1 gene:ENSCPOG00000004987 transcript:ENSCPOT00000005041	K1552	Acetylation	100% (1,000.00)	1	0	0	0	0	2	4	0	8	0	3	0	0	0	11	0	0	0	2	0	0	12	14	0	0
ENSCPOP00000004508	pep:novel scaffold:cavPor3:scaffold_61:10015177:10017367:-1 gene:ENSCPOG00000005008 transcript:ENSCPOT00000005062	K256	Acetylation	100% (46.94)	1	6	0	0	0	0	0	0	1	0	0	0	4	0	0	0	0	0	0	1	3	0	0	0	0
ENSCPOP00000004647	pep:novel scaffold:cavPor3:scaffold_62:5469429:5497388:1 gene:ENSCPOG00000005166 transcript:ENSCPOT00000005221	K512	Acetylation	100% (1,000.00)	1	0	0	0	0	0	0	0	1	0	0	0	0	2	0	0	0	0	0	0	0	0	0	0	0
ENSCPOP00000004647	pep:novel scaffold:cavPor3:scaffold_62:5469429:5497388:1 gene:ENSCPOG00000005166 transcript:ENSCPOT00000005221	K530	Acetylation	100% (54.85)	1	1	0	0	2	0	0	0	0	0	0	0	0	0	0	0	0	0	0	0	0	0	0	0	0
ENSCPOP00000004647	pep:novel scaffold:cavPor3:scaffold_62:5469429:5497388:1 gene:ENSCPOG00000005166 transcript:ENSCPOT00000005221	K488	Acetylation	100% (1,000.00)	1	15	3	20	15	0	0	0	2	0	0	0	4	8	0	0	0	0	0	2	0	0	0	0	0
ENSCPOP00000004741	pep:novel scaffold:cavPor3:scaffold_81:392114:418960:1 gene:ENSCPOG00000005272 transcript:ENSCPOT00000005329	K63	Acetylation	100% (68.50)	1	0	0	0	0	0	0	0	0	2	4	0	0	0	0	0	0	1	1	0	0	0	0	0	0
ENSCPOP00000004741	pep:novel scaffold:cavPor3:scaffold_81:392114:418960:1 gene:ENSCPOG00000005272 transcript:ENSCPOT00000005329	K620	Acetylation	100% (1,000.00)	1	0	0	0	0	2	2	0	4	3	0	0	0	0	0	0	0	1	0	0	0	0	0	0	0
ENSCPOP00000004741	pep:novel scaffold:cavPor3:scaffold_81:392114:418960:1 gene:ENSCPOG00000005272 transcript:ENSCPOT00000005329	K370	Acetylation	100% (1,000.00)	1	0	0	0	0	8	4	0	0	0	3	0	0	0	0	0	0	0	1	0	0	0	0	0	0
ENSCPOP00000004744	pep:novel scaffold:cavPor3:scaffold_36:9147038:9150518:-1 gene:ENSCPOG00000005275 transcript:ENSCPOT00000005332	K107	Acetylation	100% (1,000.00)	1	0	0	0	0	0	0	0	0	0	0	0	0	0	0	0	0	0	0	0	0	1	0	0	0
ENSCPOP00000004744	pep:novel scaffold:cavPor3:scaffold_36:9147038:9150518:-1 gene:ENSCPOG00000005275 transcript:ENSCPOT00000005332	K252	Acetylation	100% (1,000.00)	1	0	0	0	0	0	0	0	0	0	0	0	0	0	0	0	0	0	0	2	0	0	0	0	0
ENSCPOP00000004744	pep:novel scaffold:cavPor3:scaffold_36:9147038:9150518:-1 gene:ENSCPOG00000005275 transcript:ENSCPOT00000005332	K10	Acetylation	100% (125.38)	1	0	0	2	0	0	0	0	0	0	0	0	0	0	0	0	0	0	0	0	0	0	0	0	0
ENSCPOP00000004744	pep:novel scaffold:cavPor3:scaffold_36:9147038:9150518:-1 gene:ENSCPOG00000005275 transcript:ENSCPOT00000005332	K147	Acetylation	100% (1,000.00)	1	0	0	0	0	0	0	0	0	0	0	0	2	0	0	0	0	0	0	0	1	6	0	0	0
ENSCPOP00000004744	pep:novel scaffold:cavPor3:scaffold_36:9147038:9150518:-1 gene:ENSCPOG00000005275 transcript:ENSCPOT00000005332	K23	Acetylation	100% (1,000.00)	1	6	0	6	0	0	0	0	0	0	0	0	0	0	0	0	0	0	0	0	0	0	3	0	0
ENSCPOP00000004744	pep:novel scaffold:cavPor3:scaffold_36:9147038:9150518:-1 gene:ENSCPOG00000005275 transcript:ENSCPOT00000005332	K163	Acetylation	100% (59.69)	1	4	0	6	0	0	0	0	0	0	0	0	0	0	0	0	0	0	0	0	0	3	3	0	0
ENSCPOP00000004744	pep:novel scaffold:cavPor3:scaffold_36:9147038:9150518:-1 gene:ENSCPOG00000005275 transcript:ENSCPOT00000005332	K272	Acetylation	100% (1,000.00)	1	3	0	3	0	0	0	0	0	0	0	2	0	4	0	0	0	0	0	0	0	10	0	0	0
ENSCPOP00000004744	pep:novel scaffold:cavPor3:scaffold_36:9147038:9150518:-1 gene:ENSCPOG00000005275 transcript:ENSCPOT00000005332	K268	Acetylation	100% (75.46)	1	6	0	13	4	0	0	2	0	0	0	0	0	0	5	0	0	0	0	2	0	6	0	0	0
ENSCPOP00000004744	pep:novel scaffold:cavPor3:scaffold_36:9147038:9150518:-1 gene:ENSCPOG00000005275 transcript:ENSCPOT00000005332	K166	Acetylation	100% (1,000.00)	1	12	0	15	5	0	0	3	0	0	0	4	4	0	6	0	0	0	0	2	2	7	7	0	0
ENSCPOP00000004744	pep:novel scaffold:cavPor3:scaffold_36:9147038:9150518:-1 gene:ENSCPOG00000005275 transcript:ENSCPOT00000005332	K96	Acetylation	100% (1,000.00)	1	18	4	12	6	0	0	7	2	0	0	5	5	7	0	0	0	0	0	3	0	8	8	1	0
ENSCPOP00000004744	pep:novel scaffold:cavPor3:scaffold_36:9147038:9150518:-1 gene:ENSCPOG00000005275 transcript:ENSCPOT00000005332	K199	Acetylation	100% (116.97)	1	20	0	16	8	0	0	0	0	0	0	6	6	0	0	0	0	0	0	3	2	11	25	0	0
ENSCPOP00000004744	pep:novel scaffold:cavPor3:scaffold_36:9147038:9150518:-1 gene:ENSCPOG00000005275 transcript:ENSCPOT00000005332	K92	Acetylation	100% (47.91)	1	55	15	56	1	0	0	2	2	0	0	6	0	0	0	0	3	0	0	4	8	10	10	0	1
ENSCPOP00000004776	pep:novel scaffold:cavPor3:scaffold_31:12905617:12932904:-1 gene:ENSCPOG00000005312 transcript:ENSCPOT00000005369	K277	Acetylation	100% (79.95)	1	1	0	0	0	0	0	0	0	0	0	0	0	0	0	0	0	0	0	0	0	0	0	0	0
ENSCPOP00000004776	pep:novel scaffold:cavPor3:scaffold_31:12905617:12932904:-1 gene:ENSCPOG00000005312 transcript:ENSCPOT00000005369	K166	Acetylation	100% (148.90)	1	0	0	0	0	0	0	0	0	0	0	0	1	0	0	0	0	0	0	0	0	0	0	0	0
ENSCPOP00000004776	pep:novel scaffold:cavPor3:scaffold_31:12905617:12932904:-1 gene:ENSCPOG00000005312 transcript:ENSCPOT00000005369	K155	Acetylation	100% (51.98)	1	4	0	0	0	0	0	2	0	0	0	0	0	5	0	0	0	0	0	3	3	0	0	1	0
ENSCPOP00000004776	pep:novel scaffold:cavPor3:scaffold_31:12905617:12932904:-1 gene:ENSCPOG00000005312 transcript:ENSCPOT00000005369	K66	Acetylation	100% (141.27)	1	0	6	0	0	0	2	0	2	0	0	4	0	0	0	0	0	0	0	0	0	0	5	0	0
ENSCPOP00000004776	pep:novel scaffold:cavPor3:scaffold_31:12905617:12932904:-1 gene:ENSCPOG00000005312 transcript:ENSCPOT00000005369	K346	Acetylation	100% (120.07)	1	11	0	11	3	0	0	0	0	0	0	0	0	0	0	0	0	0	1	0	0	3	0	0	0
ENSCPOP00000004776	pep:novel scaffold:cavPor3:scaffold_31:12905617:12932904:-1 gene:ENSCPOG00000005312 transcript:ENSCPOT00000005369	K271	Acetylation	100% (43.88)	1	12	0	0	0	0	2	4	0	0	3	7	0	0	8	0	0	0	1	5	0	0	0	0	0
ENSCPOP00000004776	pep:novel scaffold:cavPor3:scaffold_31:12905617:12932904:-1 gene:ENSCPOG00000005312 transcript:ENSCPOT00000005369	K132	Acetylation	100% (63.45)	1	12	0	24	0	0	0	0	0	0	0	5	0	0	0	2	0	0	0	3	0	7	7	1	1
ENSCPOP00000004776	pep:novel scaffold:cavPor3:scaffold_31:12905617:12932904:-1 gene:ENSCPOG00000005312 transcript:ENSCPOT00000005369	K146	Acetylation	100% (227.00)	1	13	0	0	0	1	0	21	4	2	0	10	7	0	0	0	0	0	0	5	2	8	8	0	3
ENSCPOP00000004776	pep:novel scaffold:cavPor3:scaffold_31:12905617:12932904:-1 gene:ENSCPOG00000005312 transcript:ENSCPOT00000005369	K273	Acetylation	100% (129.91)	1	49	0	0	0	6	0	10	5	3	0	9	9	0	11	6	0	1	0	14	7	0	0	4	4
ENSCPOP00000004776	pep:novel scaffold:cavPor3:scaffold_31:12905617:12932904:-1 gene:ENSCPOG00000005312 transcript:ENSCPOT00000005369	K104	Acetylation	100% (1,000.00)	1	24	0	0	0	0	2	3	5	4	3	0	18	0	0	6	12	1	1	4	25	25	10	0	8
ENSCPOP00000004776	pep:novel scaffold:cavPor3:scaffold_31:12905617:12932904:-1 gene:ENSCPOG00000005312 transcript:ENSCPOT00000005369	K267	Acetylation	100% (105.50)	1	32	8	30	0	6	0	15	5	3	3	9	18	0	11	6	6	1	1	7	14	12	12	4	8
ENSCPOP00000004776	pep:novel scaffold:cavPor3:scaffold_31:12905617:12932904:-1 gene:ENSCPOG00000005312 transcript:ENSCPOT00000005369	K143	Acetylation	100% (89.79)	1	24	0	40	0	8	2	25	5	6	0	18	9	11	22	12	6	1	1	0	7	12	0	4	4
ENSCPOP00000004776	pep:novel scaffold:cavPor3:scaffold_31:12905617:12932904:-1 gene:ENSCPOG00000005312 transcript:ENSCPOT00000005369	K420	Acetylation	100% (1,000.00)	1	56	16	50	10	6	4	5	10	0	6	9	9	13	14	0	12	1	2	7	14	24	24	4	8
ENSCPOP00000004776	pep:novel scaffold:cavPor3:scaffold_31:12905617:12932904:-1 gene:ENSCPOG00000005312 transcript:ENSCPOT00000005369	K122	Acetylation	100% (124.66)	1	72	0	58	20	0	4	8	10	0	6	4	18	27	11	2	12	0	3	17	18	5	29	0	8
ENSCPOP00000004776	pep:novel scaffold:cavPor3:scaffold_31:12905617:12932904:-1 gene:ENSCPOG00000005312 transcript:ENSCPOT00000005369	K410	Acetylation	100% (171.44)	1	88	8	50	10	6	2	20	10	3	6	9	18	11	12	6	12	1	2	7	21	12	48	4	8
ENSCPOP00000004877	pep:novel scaffold:cavPor3:scaffold_18:8160066:8185370:1 gene:ENSCPOG00000005418 transcript:ENSCPOT00000005476	K273	Acetylation	100% (48.47)	1	0	0	0	0	0	0	0	0	0	0	0	1	0	0	0	0	0	0	0	0	0	0	0	0
ENSCPOP00000004877	pep:novel scaffold:cavPor3:scaffold_18:8160066:8185370:1 gene:ENSCPOG00000005418 transcript:ENSCPOT00000005476	K182	Acetylation	100% (122.13)	1	1	0	0	0	0	0	0	0	0	0	0	2	0	0	0	0	0	0	0	0	0	0	0	0
ENSCPOP00000004877	pep:novel scaffold:cavPor3:scaffold_18:8160066:8185370:1 gene:ENSCPOG00000005418 transcript:ENSCPOT00000005476	K112	Acetylation	100% (1,000.00)	1	3	0	0	0	0	0	0	0	0	0	0	0	0	0	0	0	0	0	0	0	0	0	0	0
ENSCPOP00000004877	pep:novel scaffold:cavPor3:scaffold_18:8160066:8185370:1 gene:ENSCPOG00000005418 transcript:ENSCPOT00000005476	K278	Acetylation	100% (45.21)	1	0	0	0	0	0	0	0	0	0	0	0	2	0	0	0	0	0	0	0	2	0	0	0	0
ENSCPOP00000004877	pep:novel scaffold:cavPor3:scaffold_18:8160066:8185370:1 gene:ENSCPOG00000005418 transcript:ENSCPOT00000005476	K475	Acetylation	100% (1,000.00)	1	6	0	0	0	0	0	0	0	0	0	0	0	0	0	0	0	0	0	1	2	0	0	0	0
ENSCPOP00000004877	pep:novel scaffold:cavPor3:scaffold_18:8160066:8185370:1 gene:ENSCPOG00000005418 transcript:ENSCPOT00000005476	K202	Acetylation	100% (1,000.00)	1	12	3	20	5	0	0	0	0	0	0	4	4	6	6	0	0	0	0	2	0	7	7	1	0
ENSCPOP00000004877	pep:novel scaffold:cavPor3:scaffold_18:8160066:8185370:1 gene:ENSCPOG00000005418 transcript:ENSCPOT00000005476	K73	Acetylation	100% (1,000.00)	1	50	10	46	21	1	0	6	2	0	0	13	6	9	0	4	3	0	0	9	4	36	34	3	0
ENSCPOP00000004894	pep:novel scaffold:cavPor3:scaffold_28:24703957:24757470:1 gene:ENSCPOG00000005438 transcript:ENSCPOT00000005496	K1530	Acetylation	100% (184.83)	1	0	0	0	0	4	0	0	0	6	0	0	0	0	0	0	0	3	0	0	0	6	0	0	0
ENSCPOP00000004894	pep:novel scaffold:cavPor3:scaffold_28:24703957:24757470:1 gene:ENSCPOG00000005438 transcript:ENSCPOT00000005496	K1533	Acetylation	100% (1,000.00)	1	0	0	0	0	4	6	0	4	6	3	0	0	0	0	0	0	2	1	0	0	0	10	0	0
ENSCPOP00000004894	pep:novel scaffold:cavPor3:scaffold_28:24703957:24757470:1 gene:ENSCPOG00000005438 transcript:ENSCPOT00000005496	K1539	Acetylation	100% (1,000.00)	1	0	0	0	0	0	9	0	4	0	9	0	0	0	0	0	0	0	3	0	0	0	22	0	0
ENSCPOP00000004894	pep:novel scaffold:cavPor3:scaffold_28:24703957:24757470:1 gene:ENSCPOG00000005438 transcript:ENSCPOT00000005496	K1534	Acetylation	100% (1,000.00)	1	0	0	0	0	4	8	0	4	6	9	0	0	0	0	0	0	2	3	0	0	0	18	0	0
ENSCPOP00000004894	pep:novel scaffold:cavPor3:scaffold_28:24703957:24757470:1 gene:ENSCPOG00000005438 transcript:ENSCPOT00000005496	K1537	Acetylation	100% (1,000.00)	1	0	0	0	0	4	9	0	4	6	9	0	0	0	0	0	0	2	3	0	0	0	22	0	0
ENSCPOP00000004894	pep:novel scaffold:cavPor3:scaffold_28:24703957:24757470:1 gene:ENSCPOG00000005438 transcript:ENSCPOT00000005496	K1521	Acetylation	100% (123.48)	1	11	0	82	0	26	15	26	18	23	26	0	24	0	21	0	0	7	5	0	10	57	75	0	4
ENSCPOP00000005002	pep:novel scaffold:cavPor3:scaffold_13:39857037:39884518:-1 gene:ENSCPOG00000005555 transcript:ENSCPOT00000005614	K312	Acetylation	100% (1,000.00)	1	0	0	2	0	0	0	1	0	0	0	0	0	0	0	0	0	0	0	0	0	3	0	0	0
ENSCPOP00000005002	pep:novel scaffold:cavPor3:scaffold_13:39857037:39884518:-1 gene:ENSCPOG00000005555 transcript:ENSCPOT00000005614	K451	Acetylation	100% (81.73)	1	15	0	5	0	0	0	3	0	0	0	4	4	0	6	0	0	0	0	2	2	7	0	0	0
ENSCPOP00000005002	pep:novel scaffold:cavPor3:scaffold_13:39857037:39884518:-1 gene:ENSCPOG00000005555 transcript:ENSCPOT00000005614	K85	Acetylation	100% (74.74)	1	18	0	32	5	0	0	0	0	0	0	3	4	11	6	0	0	0	0	2	3	13	14	0	1
ENSCPOP00000005241	pep:known scaffold:cavPor3:scaffold_25:24439713:24448145:1 gene:ENSCPOG00000005812 transcript:ENSCPOT00000005874	K89	Acetylation	100% (65.94)	1	0	0	0	0	1	6	0	0	0	2	0	0	0	0	0	0	0	1	0	0	0	0	0	0
ENSCPOP00000005365	pep:novel scaffold:cavPor3:scaffold_18:8112613:8154587:-1 gene:ENSCPOG00000005945 transcript:ENSCPOT00000006008	K166	Acetylation	100% (1,000.00)	1	0	0	1	0	0	0	0	0	0	0	0	0	0	0	0	0	0	0	0	0	0	0	0	0
ENSCPOP00000005365	pep:novel scaffold:cavPor3:scaffold_18:8112613:8154587:-1 gene:ENSCPOG00000005945 transcript:ENSCPOT00000006008	K411	Acetylation	100% (47.75)	1	2	0	0	0	0	0	0	0	0	0	3	0	0	0	0	0	0	0	1	0	0	0	0	0
ENSCPOP00000005365	pep:novel scaffold:cavPor3:scaffold_18:8112613:8154587:-1 gene:ENSCPOG00000005945 transcript:ENSCPOT00000006008	K493	Acetylation	100% (114.44)	1	4	0	0	0	0	0	0	0	0	0	0	0	0	0	0	0	0	0	0	2	0	0	0	0
ENSCPOP00000005365	pep:novel scaffold:cavPor3:scaffold_18:8112613:8154587:-1 gene:ENSCPOG00000005945 transcript:ENSCPOT00000006008	K230	Acetylation	100% (1,000.00)	1	2	0	4	0	0	0	0	0	0	0	0	0	0	0	0	0	0	0	0	0	0	0	0	0
ENSCPOP00000005365	pep:novel scaffold:cavPor3:scaffold_18:8112613:8154587:-1 gene:ENSCPOG00000005945 transcript:ENSCPOT00000006008	K295	Acetylation	100% (93.08)	1	2	0	0	0	0	0	0	0	0	0	0	2	0	3	0	0	0	0	0	2	0	4	0	0
ENSCPOP00000005365	pep:novel scaffold:cavPor3:scaffold_18:8112613:8154587:-1 gene:ENSCPOG00000005945 transcript:ENSCPOT00000006008	K390	Acetylation	100% (1,000.00)	1	4	0	3	6	0	0	0	0	0	0	0	0	0	0	0	0	0	0	1	0	0	0	0	0
ENSCPOP00000005365	pep:novel scaffold:cavPor3:scaffold_18:8112613:8154587:-1 gene:ENSCPOG00000005945 transcript:ENSCPOT00000006008	K359	Acetylation	100% (52.15)	1	6	0	0	0	0	0	3	0	0	0	0	4	0	0	0	0	0	0	0	2	0	0	0	0
ENSCPOP00000005365	pep:novel scaffold:cavPor3:scaffold_18:8112613:8154587:-1 gene:ENSCPOG00000005945 transcript:ENSCPOT00000006008	K540	Acetylation	100% (1,000.00)	1	12	0	0	0	0	0	1	0	0	0	0	0	0	0	0	0	0	0	2	0	4	0	0	0
ENSCPOP00000005365	pep:novel scaffold:cavPor3:scaffold_18:8112613:8154587:-1 gene:ENSCPOG00000005945 transcript:ENSCPOT00000006008	K326	Acetylation	100% (137.31)	1	4	0	6	4	0	0	0	0	0	0	0	0	2	1	0	0	0	0	0	0	3	0	0	0
ENSCPOP00000005365	pep:novel scaffold:cavPor3:scaffold_18:8112613:8154587:-1 gene:ENSCPOG00000005945 transcript:ENSCPOT00000006008	K285	Acetylation	100% (1,000.00)	1	2	0	4	4	0	0	0	0	0	0	3	3	0	0	0	0	0	0	1	1	5	0	0	0
ENSCPOP00000005365	pep:novel scaffold:cavPor3:scaffold_18:8112613:8154587:-1 gene:ENSCPOG00000005945 transcript:ENSCPOT00000006008	K289	Acetylation	100% (1,000.00)	1	2	0	4	4	0	0	0	0	0	0	3	3	0	0	0	0	0	0	1	2	5	0	0	0
ENSCPOP00000005365	pep:novel scaffold:cavPor3:scaffold_18:8112613:8154587:-1 gene:ENSCPOG00000005945 transcript:ENSCPOT00000006008	K303	Acetylation	100% (97.39)	1	5	2	14	2	0	0	0	0	0	0	0	0	0	0	0	0	0	0	0	0	0	3	0	0
ENSCPOP00000005365	pep:novel scaffold:cavPor3:scaffold_18:8112613:8154587:-1 gene:ENSCPOG00000005945 transcript:ENSCPOT00000006008	K460	Acetylation	100% (140.78)	1	10	0	12	0	0	0	0	0	0	0	0	6	0	0	0	0	0	0	1	1	10	2	0	0
ENSCPOP00000005365	pep:novel scaffold:cavPor3:scaffold_18:8112613:8154587:-1 gene:ENSCPOG00000005945 transcript:ENSCPOT00000006008	K46	Acetylation	100% (1,000.00)	1	12	0	20	0	0	0	2	0	0	0	0	8	0	6	0	0	0	0	2	2	0	0	0	0
ENSCPOP00000005365	pep:novel scaffold:cavPor3:scaffold_18:8112613:8154587:-1 gene:ENSCPOG00000005945 transcript:ENSCPOT00000006008	K505	Acetylation	100% (181.67)	1	22	0	0	0	0	0	0	0	0	0	5	5	0	0	2	0	0	0	3	0	8	8	1	1
ENSCPOP00000005365	pep:novel scaffold:cavPor3:scaffold_18:8112613:8154587:-1 gene:ENSCPOG00000005945 transcript:ENSCPOT00000006008	K664	Acetylation	100% (1,000.00)	1	12	0	16	4	0	0	0	0	0	0	6	6	0	0	0	0	0	0	2	2	5	10	0	0
ENSCPOP00000005365	pep:novel scaffold:cavPor3:scaffold_18:8112613:8154587:-1 gene:ENSCPOG00000005945 transcript:ENSCPOT00000006008	K353	Acetylation	100% (108.21)	1	17	4	12	0	0	0	2	2	0	0	5	7	1	1	0	0	0	0	3	3	7	7	0	1
ENSCPOP00000005365	pep:novel scaffold:cavPor3:scaffold_18:8112613:8154587:-1 gene:ENSCPOG00000005945 transcript:ENSCPOT00000006008	K406	Acetylation	100% (134.54)	1	16	0	18	0	0	0	0	2	0	0	5	5	0	0	0	0	0	0	6	3	14	7	0	1
ENSCPOP00000005365	pep:novel scaffold:cavPor3:scaffold_18:8112613:8154587:-1 gene:ENSCPOG00000005945 transcript:ENSCPOT00000006008	K60	Acetylation	100% (1,000.00)	1	32	0	0	6	0	0	10	4	0	0	20	10	7	14	0	0	0	0	3	3	16	8	0	1
ENSCPOP00000005365	pep:novel scaffold:cavPor3:scaffold_18:8112613:8154587:-1 gene:ENSCPOG00000005945 transcript:ENSCPOT00000006008	K129	Acetylation	100% (74.74)	1	32	8	24	12	0	0	8	2	0	0	10	5	28	7	0	0	0	0	6	3	8	0	1	1
ENSCPOP00000005365	pep:novel scaffold:cavPor3:scaffold_18:8112613:8154587:-1 gene:ENSCPOG00000005945 transcript:ENSCPOT00000006008	K728	Acetylation	100% (1,000.00)	1	35	20	56	14	0	0	8	4	0	0	12	6	8	24	3	3	0	0	8	8	18	18	1	1
ENSCPOP00000005538	pep:novel scaffold:cavPor3:scaffold_72:6798826:6803599:1 gene:ENSCPOG00000006141 transcript:ENSCPOT00000006205	K58	Acetylation	100% (112.20)	1	7	0	4	0	0	0	0	0	0	0	0	0	0	0	0	0	0	0	0	0	0	0	0	0
ENSCPOP00000005574	pep:novel scaffold:cavPor3:scaffold_98:2603528:2651679:-1 gene:ENSCPOG00000006181 transcript:ENSCPOT00000006245	K56	Acetylation	100% (131.32)	1	2	0	0	0	0	0	0	0	0	0	0	0	0	0	0	0	0	0	0	0	1	0	0	0
ENSCPOP00000005574	pep:novel scaffold:cavPor3:scaffold_98:2603528:2651679:-1 gene:ENSCPOG00000006181 transcript:ENSCPOT00000006245	K49	Acetylation	100% (147.31)	1	0	0	0	0	2	4	0	0	3	3	0	5	0	0	0	0	0	2	0	4	0	0	0	0
ENSCPOP00000005737	pep:novel scaffold:cavPor3:scaffold_13:25062675:25097078:-1 gene:ENSCPOG00000006368 transcript:ENSCPOT00000006433	K39	Acetylation	100% (1,000.00)	1	0	0	0	0	0	0	0	0	0	0	0	0	0	0	0	1	0	0	0	0	0	0	0	0
ENSCPOP00000005737	pep:novel scaffold:cavPor3:scaffold_13:25062675:25097078:-1 gene:ENSCPOG00000006368 transcript:ENSCPOT00000006433	K35	Acetylation	100% (1,000.00)	1	0	0	0	0	0	0	0	0	0	0	0	0	0	0	0	1	0	0	0	0	0	0	0	0
ENSCPOP00000005768	pep:novel scaffold:cavPor3:scaffold_101:3490897:3515922:-1 gene:ENSCPOG00000006400 transcript:ENSCPOT00000006465	K157	Acetylation	100% (51.20)	1	0	0	4	0	0	0	2	1	0	0	0	0	3	0	0	0	0	0	0	0	4	0	0	0
ENSCPOP00000005768	pep:novel scaffold:cavPor3:scaffold_101:3490897:3515922:-1 gene:ENSCPOG00000006400 transcript:ENSCPOT00000006465	K227	Acetylation	100% (1,000.00)	1	96	0	126	36	14	4	75	35	6	0	0	0	30	20	12	12	2	2	14	28	22	33	8	16
ENSCPOP00000005809	pep:novel scaffold:cavPor3:scaffold_16:18485099:18539975:1 gene:ENSCPOG00000006449 transcript:ENSCPOT00000006514	K666	Acetylation	100% (64.94)	1	0	0	0	0	0	0	0	0	0	0	0	0	0	0	0	0	0	1	0	0	0	0	0	0
ENSCPOP00000005809	pep:novel scaffold:cavPor3:scaffold_16:18485099:18539975:1 gene:ENSCPOG00000006449 transcript:ENSCPOT00000006514	K888	Acetylation	100% (1,000.00)	1	0	0	0	0	0	0	0	0	0	0	0	0	0	0	0	0	0	1	0	0	0	0	0	0
ENSCPOP00000005853	pep:novel scaffold:cavPor3:scaffold_19:28931012:28940008:-1 gene:ENSCPOG00000006501 transcript:ENSCPOT00000006566	K305	Acetylation	100% (1,000.00)	1	0	0	0	0	0	0	0	0	0	0	1	0	0	0	0	0	0	0	0	0	0	0	0	0
ENSCPOP00000005984	pep:novel scaffold:cavPor3:scaffold_42:8074962:8079844:1 gene:ENSCPOG00000006645 transcript:ENSCPOT00000006711	K66	Acetylation	100% (131.88)	1	0	0	0	0	0	0	0	0	0	0	0	2	0	0	0	0	0	0	0	1	0	0	0	0
ENSCPOP00000005984	pep:novel scaffold:cavPor3:scaffold_42:8074962:8079844:1 gene:ENSCPOG00000006645 transcript:ENSCPOT00000006711	K36	Acetylation	100% (1,000.00)	1	1	0	3	0	0	0	0	0	0	0	2	0	0	0	0	0	0	0	0	0	0	0	0	0
ENSCPOP00000005984	pep:novel scaffold:cavPor3:scaffold_42:8074962:8079844:1 gene:ENSCPOG00000006645 transcript:ENSCPOT00000006711	K104	Acetylation	100% (48.76)	1	2	0	4	0	0	0	1	0	0	0	3	0	0	0	0	0	0	0	0	0	0	0	0	0
ENSCPOP00000005984	pep:novel scaffold:cavPor3:scaffold_42:8074962:8079844:1 gene:ENSCPOG00000006645 transcript:ENSCPOT00000006711	K375	Acetylation	100% (1,000.00)	1	4	0	0	0	0	0	0	0	0	0	0	3	0	0	0	0	0	0	2	1	0	0	0	0
ENSCPOP00000006024	pep:novel scaffold:cavPor3:scaffold_4:38435711:38461669:1 gene:ENSCPOG00000006687 transcript:ENSCPOT00000006755	K98	Acetylation	100% (1,000.00)	1	0	0	0	0	0	0	0	0	0	0	0	3	0	0	0	0	0	0	0	2	0	0	0	1
ENSCPOP00000006024	pep:novel scaffold:cavPor3:scaffold_4:38435711:38461669:1 gene:ENSCPOG00000006687 transcript:ENSCPOT00000006755	K92	Acetylation	100% (81.97)	1	4	0	0	0	0	0	0	0	0	0	0	3	0	0	0	0	0	0	0	1	0	0	0	0
ENSCPOP00000006024	pep:novel scaffold:cavPor3:scaffold_4:38435711:38461669:1 gene:ENSCPOG00000006687 transcript:ENSCPOT00000006755	K352	Acetylation	100% (106.50)	1	3	0	0	0	0	0	0	0	0	0	0	0	2	0	0	0	0	0	0	0	0	3	0	0
ENSCPOP00000006024	pep:novel scaffold:cavPor3:scaffold_4:38435711:38461669:1 gene:ENSCPOG00000006687 transcript:ENSCPOT00000006755	K42	Acetylation	100% (1,000.00)	1	6	0	0	0	0	0	0	0	0	0	0	0	0	0	0	0	0	0	0	0	0	2	0	0
ENSCPOP00000006024	pep:novel scaffold:cavPor3:scaffold_4:38435711:38461669:1 gene:ENSCPOG00000006687 transcript:ENSCPOT00000006755	K66	Acetylation	100% (1,000.00)	1	4	2	4	4	0	0	0	0	0	0	3	0	0	0	0	0	0	0	1	1	0	0	0	0
ENSCPOP00000006024	pep:novel scaffold:cavPor3:scaffold_4:38435711:38461669:1 gene:ENSCPOG00000006687 transcript:ENSCPOT00000006755	K199	Acetylation	100% (1,000.00)	1	40	0	14	0	0	0	2	0	0	0	6	48	0	24	9	9	0	0	8	16	9	18	1	1
ENSCPOP00000006024	pep:novel scaffold:cavPor3:scaffold_4:38435711:38461669:1 gene:ENSCPOG00000006687 transcript:ENSCPOT00000006755	K162	Acetylation	100% (1,000.00)	1	40	5	28	14	0	0	8	0	0	0	6	18	16	8	6	6	0	0	4	8	18	27	2	1
ENSCPOP00000006024	pep:novel scaffold:cavPor3:scaffold_4:38435711:38461669:1 gene:ENSCPOG00000006687 transcript:ENSCPOT00000006755	K359	Acetylation	100% (212.36)	1	70	10	49	14	0	0	6	0	0	0	12	18	16	16	3	3	0	0	12	8	27	18	0	2
ENSCPOP00000006048	pep:novel scaffold:cavPor3:scaffold_0:56808126:56813926:-1 gene:ENSCPOG00000006713 transcript:ENSCPOT00000006781	K347	Acetylation	100% (78.73)	1	7	0	0	0	0	0	0	0	0	0	0	0	0	0	0	0	0	0	0	0	0	1	0	0
ENSCPOP00000006048	pep:novel scaffold:cavPor3:scaffold_0:56808126:56813926:-1 gene:ENSCPOG00000006713 transcript:ENSCPOT00000006781	K336	Acetylation	100% (148.69)	1	1	0	8	2	0	0	0	0	0	0	0	0	0	0	0	0	0	0	0	0	5	0	0	0
ENSCPOP00000006110	pep:novel scaffold:cavPor3:scaffold_133:482874:494940:-1 gene:ENSCPOG00000006779 transcript:ENSCPOT00000006848	K43	Acetylation	100% (50.89)	1	2	0	10	0	0	0	0	0	0	0	0	0	3	0	0	0	0	0	0	0	4	0	0	0
ENSCPOP00000006169	pep:novel scaffold:cavPor3:scaffold_1:31134238:31141657:1 gene:ENSCPOG00000006844 transcript:ENSCPOT00000006913	K5	Acetylation	100% (1,000.00)	1	0	0	0	0	1	0	0	0	0	0	0	0	0	0	0	0	0	0	0	0	0	0	0	0
ENSCPOP00000006169	pep:novel scaffold:cavPor3:scaffold_1:31134238:31141657:1 gene:ENSCPOG00000006844 transcript:ENSCPOT00000006913	K39	Acetylation	100% (1,000.00)	1	0	0	0	0	0	0	0	0	1	0	0	0	0	0	0	0	0	0	0	0	0	0	0	0
ENSCPOP00000006169	pep:novel scaffold:cavPor3:scaffold_1:31134238:31141657:1 gene:ENSCPOG00000006844 transcript:ENSCPOT00000006913	K100	Acetylation	100% (101.67)	1	0	0	0	0	14	4	4	0	9	9	0	0	0	0	0	0	2	1	0	0	0	0	0	0
ENSCPOP00000006188	pep:novel scaffold:cavPor3:scaffold_140:2258615:2264853:-1 gene:ENSCPOG00000006864 transcript:ENSCPOT00000006933	K46	Acetylation	100% (52.75)	1	0	0	0	0	0	2	0	0	0	0	0	0	0	0	0	0	0	0	0	0	0	0	0	0
ENSCPOP00000006188	pep:novel scaffold:cavPor3:scaffold_140:2258615:2264853:-1 gene:ENSCPOG00000006864 transcript:ENSCPOT00000006933	K134	Acetylation	100% (1,000.00)	1	0	0	0	0	4	0	0	0	3	0	0	0	0	0	0	0	1	0	0	0	0	0	0	0
ENSCPOP00000006188	pep:novel scaffold:cavPor3:scaffold_140:2258615:2264853:-1 gene:ENSCPOG00000006864 transcript:ENSCPOT00000006933	K35	Acetylation	100% (114.08)	1	0	0	0	0	4	0	0	0	3	3	0	0	0	0	0	0	1	2	0	0	0	0	0	0
ENSCPOP00000006188	pep:novel scaffold:cavPor3:scaffold_140:2258615:2264853:-1 gene:ENSCPOG00000006864 transcript:ENSCPOT00000006933	K51	Acetylation	100% (1,000.00)	1	0	0	0	0	10	0	0	0	6	0	0	0	0	0	0	0	1	1	0	0	0	0	0	0
ENSCPOP00000006188	pep:novel scaffold:cavPor3:scaffold_140:2258615:2264853:-1 gene:ENSCPOG00000006864 transcript:ENSCPOT00000006933	K146	Acetylation	100% (59.79)	1	0	0	0	0	4	2	8	0	3	3	0	0	0	0	0	0	1	0	0	0	0	0	0	0
ENSCPOP00000006188	pep:novel scaffold:cavPor3:scaffold_140:2258615:2264853:-1 gene:ENSCPOG00000006864 transcript:ENSCPOT00000006933	K43	Acetylation	100% (74.09)	1	0	0	0	0	12	2	0	0	9	3	0	0	0	0	0	0	2	3	0	0	0	0	0	0
ENSCPOP00000006214	pep:novel scaffold:cavPor3:scaffold_148:1877596:1883892:1 gene:ENSCPOG00000006890 transcript:ENSCPOT00000006959	K206	Acetylation	100% (1,000.00)	1	2	0	0	0	0	0	0	0	0	0	0	0	0	0	0	0	0	0	0	0	2	0	0	0
ENSCPOP00000006354	pep:known scaffold:cavPor3:scaffold_13:17431200:17450183:1 gene:ENSCPOG00000007045 transcript:ENSCPOT00000007114	K1930	Acetylation	100% (1,000.00)	1	0	0	0	0	0	0	0	0	0	0	0	0	1	0	0	0	0	0	0	0	0	0	0	0
ENSCPOP00000006354	pep:known scaffold:cavPor3:scaffold_13:17431200:17450183:1 gene:ENSCPOG00000007045 transcript:ENSCPOT00000007114	K1247	Acetylation	100% (1,000.00)	1	0	0	0	0	0	0	0	0	0	0	0	0	0	0	0	0	0	0	0	0	1	0	0	0
ENSCPOP00000006354	pep:known scaffold:cavPor3:scaffold_13:17431200:17450183:1 gene:ENSCPOG00000007045 transcript:ENSCPOT00000007114	K434	Acetylation	100% (1,000.00)	1	0	0	0	0	0	0	0	0	0	0	0	0	0	0	0	0	0	0	0	0	1	0	0	0
ENSCPOP00000006354	pep:known scaffold:cavPor3:scaffold_13:17431200:17450183:1 gene:ENSCPOG00000007045 transcript:ENSCPOT00000007114	K1016	Acetylation	100% (71.99)	1	0	0	0	0	0	0	0	0	0	0	0	0	0	0	0	0	0	0	0	0	1	0	0	0
ENSCPOP00000006354	pep:known scaffold:cavPor3:scaffold_13:17431200:17450183:1 gene:ENSCPOG00000007045 transcript:ENSCPOT00000007114	K246	Acetylation	100% (1,000.00)	1	0	0	0	0	0	0	0	0	0	0	0	0	0	0	0	0	0	0	0	0	0	1	0	0
ENSCPOP00000006354	pep:known scaffold:cavPor3:scaffold_13:17431200:17450183:1 gene:ENSCPOG00000007045 transcript:ENSCPOT00000007114	K1173	Acetylation	100% (1,000.00)	1	0	0	0	0	0	0	0	0	0	0	0	0	0	0	0	0	0	0	0	0	0	1	0	0
ENSCPOP00000006354	pep:known scaffold:cavPor3:scaffold_13:17431200:17450183:1 gene:ENSCPOG00000007045 transcript:ENSCPOT00000007114	K1451	Acetylation	100% (106.36)	1	0	0	1	0	0	0	0	0	0	0	0	0	0	0	0	0	0	0	0	0	2	0	0	0
ENSCPOP00000006354	pep:known scaffold:cavPor3:scaffold_13:17431200:17450183:1 gene:ENSCPOG00000007045 transcript:ENSCPOT00000007114	K1569	Acetylation	100% (1,000.00)	1	0	0	2	1	0	0	0	0	0	0	0	0	0	0	0	0	0	0	0	0	0	0	0	0
ENSCPOP00000006354	pep:known scaffold:cavPor3:scaffold_13:17431200:17450183:1 gene:ENSCPOG00000007045 transcript:ENSCPOT00000007114	K383	Acetylation	100% (130.25)	1	0	0	1	0	0	0	0	0	0	0	0	0	0	0	0	0	0	0	0	0	2	0	0	0
ENSCPOP00000006354	pep:known scaffold:cavPor3:scaffold_13:17431200:17450183:1 gene:ENSCPOG00000007045 transcript:ENSCPOT00000007114	K1831	Acetylation	100% (1,000.00)	1	0	0	0	0	0	0	0	0	0	0	0	0	0	0	0	0	0	0	0	0	1	2	0	0
ENSCPOP00000006354	pep:known scaffold:cavPor3:scaffold_13:17431200:17450183:1 gene:ENSCPOG00000007045 transcript:ENSCPOT00000007114	K278	Acetylation	100% (1,000.00)	1	0	0	3	1	0	0	0	0	0	0	0	0	0	0	0	0	0	0	0	0	0	0	0	0
ENSCPOP00000006354	pep:known scaffold:cavPor3:scaffold_13:17431200:17450183:1 gene:ENSCPOG00000007045 transcript:ENSCPOT00000007114	K876	Acetylation	100% (88.12)	1	0	0	0	1	0	0	0	0	0	0	0	0	0	0	0	0	0	0	0	0	2	1	0	0
ENSCPOP00000006354	pep:known scaffold:cavPor3:scaffold_13:17431200:17450183:1 gene:ENSCPOG00000007045 transcript:ENSCPOT00000007114	K1791	Acetylation	100% (1,000.00)	1	0	0	4	0	0	0	0	1	0	0	0	0	0	0	0	0	0	0	0	0	0	0	0	0
ENSCPOP00000006354	pep:known scaffold:cavPor3:scaffold_13:17431200:17450183:1 gene:ENSCPOG00000007045 transcript:ENSCPOT00000007114	K860	Acetylation	100% (116.23)	1	1	0	2	2	0	0	0	0	0	0	0	0	0	0	0	0	0	0	0	0	0	0	0	0
ENSCPOP00000006354	pep:known scaffold:cavPor3:scaffold_13:17431200:17450183:1 gene:ENSCPOG00000007045 transcript:ENSCPOT00000007114	K67	Acetylation	100% (1,000.00)	1	0	0	0	0	0	0	0	0	0	0	0	0	0	1	0	0	0	0	0	0	2	2	0	0
ENSCPOP00000006354	pep:known scaffold:cavPor3:scaffold_13:17431200:17450183:1 gene:ENSCPOG00000007045 transcript:ENSCPOT00000007114	K1026	Acetylation	100% (118.84)	1	0	0	0	0	0	0	0	0	0	0	0	0	1	0	0	0	0	0	0	0	2	2	0	0
ENSCPOP00000006354	pep:known scaffold:cavPor3:scaffold_13:17431200:17450183:1 gene:ENSCPOG00000007045 transcript:ENSCPOT00000007114	K1870	Acetylation	100% (92.31)	1	0	0	3	1	0	0	0	0	0	0	0	0	0	0	0	0	0	0	0	0	0	2	0	0
ENSCPOP00000006354	pep:known scaffold:cavPor3:scaffold_13:17431200:17450183:1 gene:ENSCPOG00000007045 transcript:ENSCPOT00000007114	K1354	Acetylation	100% (1,000.00)	1	0	0	2	0	0	0	0	0	0	0	0	0	0	0	0	0	0	0	0	0	0	4	0	0
ENSCPOP00000006354	pep:known scaffold:cavPor3:scaffold_13:17431200:17450183:1 gene:ENSCPOG00000007045 transcript:ENSCPOT00000007114	K565	Acetylation	100% (1,000.00)	1	0	0	1	1	0	0	0	0	0	0	0	0	0	2	0	0	0	0	0	0	3	0	0	0
ENSCPOP00000006354	pep:known scaffold:cavPor3:scaffold_13:17431200:17450183:1 gene:ENSCPOG00000007045 transcript:ENSCPOT00000007114	K1294	Acetylation	100% (1,000.00)	1	0	0	4	1	0	0	0	0	0	0	0	0	0	0	0	0	0	0	0	0	0	2	0	0
ENSCPOP00000006354	pep:known scaffold:cavPor3:scaffold_13:17431200:17450183:1 gene:ENSCPOG00000007045 transcript:ENSCPOT00000007114	K43	Acetylation	100% (70.62)	1	0	0	3	1	0	0	0	0	0	0	0	0	0	1	0	0	0	0	0	0	2	0	0	0
ENSCPOP00000006354	pep:known scaffold:cavPor3:scaffold_13:17431200:17450183:1 gene:ENSCPOG00000007045 transcript:ENSCPOT00000007114	K1374	Acetylation	100% (1,000.00)	1	0	0	2	1	0	0	0	0	0	0	0	0	0	2	0	0	0	0	0	0	0	3	0	0
ENSCPOP00000006354	pep:known scaffold:cavPor3:scaffold_13:17431200:17450183:1 gene:ENSCPOG00000007045 transcript:ENSCPOT00000007114	K1587	Acetylation	100% (91.82)	1	0	0	1	0	0	0	0	0	0	0	0	0	0	1	0	0	0	0	0	0	1	6	0	0
ENSCPOP00000006354	pep:known scaffold:cavPor3:scaffold_13:17431200:17450183:1 gene:ENSCPOG00000007045 transcript:ENSCPOT00000007114	K1279	Acetylation	100% (1,000.00)	1	0	0	2	0	0	0	0	0	0	0	0	0	2	2	0	0	0	0	0	0	3	3	0	0
ENSCPOP00000006354	pep:known scaffold:cavPor3:scaffold_13:17431200:17450183:1 gene:ENSCPOG00000007045 transcript:ENSCPOT00000007114	K1499	Acetylation	100% (1,000.00)	1	0	0	2	0	0	0	0	0	0	0	0	0	3	2	0	0	0	0	0	0	5	0	0	0
ENSCPOP00000006354	pep:known scaffold:cavPor3:scaffold_13:17431200:17450183:1 gene:ENSCPOG00000007045 transcript:ENSCPOT00000007114	K1459	Acetylation	100% (157.41)	1	0	0	6	0	0	0	0	0	0	0	0	0	1	2	0	0	0	0	0	0	3	3	0	0
ENSCPOP00000006354	pep:known scaffold:cavPor3:scaffold_13:17431200:17450183:1 gene:ENSCPOG00000007045 transcript:ENSCPOT00000007114	K853	Acetylation	100% (109.64)	1	0	0	2	1	0	0	0	0	0	0	0	0	4	2	0	0	0	0	0	0	0	6	0	0
ENSCPOP00000006354	pep:known scaffold:cavPor3:scaffold_13:17431200:17450183:1 gene:ENSCPOG00000007045 transcript:ENSCPOT00000007114	K657	Acetylation	100% (1,000.00)	1	0	0	5	0	0	0	0	0	0	0	0	0	2	0	0	0	0	0	0	0	5	3	0	0
ENSCPOP00000006354	pep:known scaffold:cavPor3:scaffold_13:17431200:17450183:1 gene:ENSCPOG00000007045 transcript:ENSCPOT00000007114	K1316	Acetylation	100% (1,000.00)	1	0	0	5	1	0	0	0	0	0	0	0	0	2	0	0	0	0	0	0	0	5	3	0	0
ENSCPOP00000006354	pep:known scaffold:cavPor3:scaffold_13:17431200:17450183:1 gene:ENSCPOG00000007045 transcript:ENSCPOT00000007114	K865	Acetylation	100% (1,000.00)	1	0	0	8	2	0	0	0	0	0	0	0	0	5	6	0	0	0	0	1	0	8	4	0	0
ENSCPOP00000006354	pep:known scaffold:cavPor3:scaffold_13:17431200:17450183:1 gene:ENSCPOG00000007045 transcript:ENSCPOT00000007114	K1641	Acetylation	100% (52.15)	1	0	0	12	3	0	0	0	0	0	0	0	2	4	4	0	0	0	0	0	1	5	5	0	0
ENSCPOP00000006354	pep:known scaffold:cavPor3:scaffold_13:17431200:17450183:1 gene:ENSCPOG00000007045 transcript:ENSCPOT00000007114	K951	Acetylation	100% (1,000.00)	1	2	0	8	4	0	0	0	0	0	0	3	3	0	5	0	0	0	0	0	2	13	14	0	0
ENSCPOP00000006354	pep:known scaffold:cavPor3:scaffold_13:17431200:17450183:1 gene:ENSCPOG00000007045 transcript:ENSCPOT00000007114	K1579	Acetylation	100% (179.07)	1	2	0	8	0	0	0	0	0	0	0	0	6	1	13	0	0	0	0	0	1	7	23	0	0
ENSCPOP00000006354	pep:known scaffold:cavPor3:scaffold_13:17431200:17450183:1 gene:ENSCPOG00000007045 transcript:ENSCPOT00000007114	K1528	Acetylation	100% (1,000.00)	1	0	0	20	10	0	0	0	1	0	0	0	2	6	6	0	0	0	0	0	0	13	8	0	0
ENSCPOP00000006354	pep:known scaffold:cavPor3:scaffold_13:17431200:17450183:1 gene:ENSCPOG00000007045 transcript:ENSCPOT00000007114	K1814	Acetylation	100% (1,000.00)	1	10	0	22	5	0	0	3	1	0	0	4	0	9	12	0	0	0	0	2	0	11	8	0	0
ENSCPOP00000006354	pep:known scaffold:cavPor3:scaffold_13:17431200:17450183:1 gene:ENSCPOG00000007045 transcript:ENSCPOT00000007114	K413	Acetylation	100% (201.35)	1	15	0	37	0	0	0	3	0	0	0	0	0	11	7	0	0	0	0	2	0	24	21	0	0
ENSCPOP00000006437	pep:novel scaffold:cavPor3:scaffold_28:15032532:15047155:-1 gene:ENSCPOG00000007138 transcript:ENSCPOT00000007209	K119	Acetylation	100% (133.60)	1	0	0	0	0	2	0	0	0	0	0	0	0	0	0	0	0	0	0	0	0	0	0	0	0
ENSCPOP00000006437	pep:novel scaffold:cavPor3:scaffold_28:15032532:15047155:-1 gene:ENSCPOG00000007138 transcript:ENSCPOT00000007209	K82	Acetylation	100% (224.19)	1	0	0	0	0	6	0	0	0	6	3	0	0	0	0	0	0	2	1	0	0	0	0	0	0
ENSCPOP00000006558	pep:novel scaffold:cavPor3:scaffold_10:15096255:15116972:-1 gene:ENSCPOG00000007279 transcript:ENSCPOT00000007351	K113	Acetylation	100% (121.66)	1	0	0	0	0	0	0	0	0	0	0	0	0	0	0	0	0	1	0	0	0	0	0	0	0
ENSCPOP00000006558	pep:novel scaffold:cavPor3:scaffold_10:15096255:15116972:-1 gene:ENSCPOG00000007279 transcript:ENSCPOT00000007351	K119	Acetylation	100% (1,000.00)	1	0	0	0	0	0	0	0	0	0	0	0	0	0	0	0	0	1	0	0	0	0	0	0	0
ENSCPOP00000006558	pep:novel scaffold:cavPor3:scaffold_10:15096255:15116972:-1 gene:ENSCPOG00000007279 transcript:ENSCPOT00000007351	K214	Acetylation	100% (92.31)	1	0	0	0	0	0	0	0	0	0	0	0	0	0	0	0	0	1	1	0	0	0	0	0	0
ENSCPOP00000006603	pep:novel scaffold:cavPor3:scaffold_51:11246067:11253138:-1 gene:ENSCPOG00000007325 transcript:ENSCPOT00000007397	K59	Acetylation	100% (83.39)	1	0	0	0	0	0	0	0	0	0	0	0	0	0	0	0	0	0	0	0	0	4	1	0	0
ENSCPOP00000006603	pep:novel scaffold:cavPor3:scaffold_51:11246067:11253138:-1 gene:ENSCPOG00000007325 transcript:ENSCPOT00000007397	K138	Acetylation	100% (207.10)	1	0	0	10	0	0	0	0	0	0	0	0	0	0	0	0	0	0	0	0	0	7	7	0	0
ENSCPOP00000006706	pep:novel scaffold:cavPor3:scaffold_4:44977426:44980103:-1 gene:ENSCPOG00000007434 transcript:ENSCPOT00000007506	K42	Acetylation	100% (1,000.00)	1	0	0	0	0	0	0	0	0	0	0	0	0	0	0	0	0	0	0	0	0	0	0	0	1
ENSCPOP00000006706	pep:novel scaffold:cavPor3:scaffold_4:44977426:44980103:-1 gene:ENSCPOG00000007434 transcript:ENSCPOT00000007506	K108	Acetylation	100% (61.06)	1	0	0	0	0	0	2	16	4	0	0	0	0	0	0	0	0	1	0	0	0	0	0	6	3
ENSCPOP00000006718	pep:novel scaffold:cavPor3:scaffold_1:48814222:48823901:1 gene:ENSCPOG00000007447 transcript:ENSCPOT00000007519	K84	Acetylation	100% (142.14)	1	2	0	0	0	0	0	0	0	0	0	0	0	0	0	0	0	0	0	0	0	0	0	0	0
ENSCPOP00000006890	pep:novel scaffold:cavPor3:scaffold_52:12354816:12361038:-1 gene:ENSCPOG00000007646 transcript:ENSCPOT00000007719	K206	Acetylation	100% (1,000.00)	1	0	0	0	0	0	0	0	0	0	0	0	1	0	0	0	0	0	0	0	0	0	0	0	0
ENSCPOP00000007144	pep:novel scaffold:cavPor3:scaffold_16:6051811:6427589:1 gene:ENSCPOG00000007936 transcript:ENSCPOT00000008011	K1087	Acetylation	100% (1,000.00)	1	0	0	0	2	0	0	0	1	0	0	0	0	0	0	0	0	0	0	0	0	0	0	0	0
ENSCPOP00000007149	pep:novel scaffold:cavPor3:scaffold_70:6531838:6544665:1 gene:ENSCPOG00000007941 transcript:ENSCPOT00000008016	K110	Acetylation	100% (1,000.00)	1	3	0	0	2	0	0	0	0	0	0	0	0	0	0	0	0	0	0	0	0	0	3	0	0
ENSCPOP00000007508	pep:novel scaffold:cavPor3:scaffold_9:51686367:51727337:-1 gene:ENSCPOG00000008351 transcript:ENSCPOT00000008426	K443	Acetylation	100% (1,000.00)	1	0	0	0	0	0	1	0	0	0	0	0	0	0	0	0	0	1	0	0	0	0	0	0	0
ENSCPOP00000007508	pep:novel scaffold:cavPor3:scaffold_9:51686367:51727337:-1 gene:ENSCPOG00000008351 transcript:ENSCPOT00000008426	K749	Acetylation	100% (55.85)	1	0	0	0	0	11	2	12	0	5	3	0	0	0	0	0	0	1	1	0	0	0	0	0	0
ENSCPOP00000007615	pep:novel scaffold:cavPor3:scaffold_52:12426960:12436947:-1 gene:ENSCPOG00000008471 transcript:ENSCPOT00000008548	K110	Acetylation	100% (1,000.00)	1	0	0	1	0	0	0	0	0	0	0	0	0	0	0	0	0	0	0	0	0	0	0	0	0
ENSCPOP00000007621	pep:novel scaffold:cavPor3:scaffold_82:2579305:2602204:-1 gene:ENSCPOG00000008479 transcript:ENSCPOT00000008556	K209	Acetylation	100% (52.92)	1	0	0	2	0	0	0	0	0	0	0	0	0	0	0	0	0	0	0	0	0	0	0	0	0
ENSCPOP00000007621	pep:novel scaffold:cavPor3:scaffold_82:2579305:2602204:-1 gene:ENSCPOG00000008479 transcript:ENSCPOT00000008556	K61	Acetylation	100% (1,000.00)	1	0	0	4	0	0	0	0	0	0	0	0	0	0	0	0	0	0	0	0	0	4	2	0	0
ENSCPOP00000007630	pep:novel scaffold:cavPor3:scaffold_10:34101089:34115102:1 gene:ENSCPOG00000008488 transcript:ENSCPOT00000008565	K243	Acetylation	100% (92.04)	1	0	0	0	0	0	0	0	0	1	0	0	0	0	0	0	0	0	0	0	0	0	0	0	0
ENSCPOP00000007630	pep:novel scaffold:cavPor3:scaffold_10:34101089:34115102:1 gene:ENSCPOG00000008488 transcript:ENSCPOT00000008565	K299	Acetylation	100% (81.58)	1	0	0	0	0	3	0	0	0	0	0	0	0	0	0	0	0	0	0	2	0	0	0	0	0
ENSCPOP00000007630	pep:novel scaffold:cavPor3:scaffold_10:34101089:34115102:1 gene:ENSCPOG00000008488 transcript:ENSCPOT00000008565	K280	Acetylation	100% (1,000.00)	1	20	0	0	0	2	4	0	0	0	6	0	17	1	0	0	4	1	2	1	6	5	5	0	0
ENSCPOP00000007630	pep:novel scaffold:cavPor3:scaffold_10:34101089:34115102:1 gene:ENSCPOG00000008488 transcript:ENSCPOT00000008565	K442	Acetylation	100% (79.49)	1	30	0	42	0	6	2	4	0	0	3	6	0	8	0	0	0	0	1	0	0	9	18	0	0
ENSCPOP00000007630	pep:novel scaffold:cavPor3:scaffold_10:34101089:34115102:1 gene:ENSCPOG00000008488 transcript:ENSCPOT00000008565	K263	Acetylation	100% (209.02)	1	49	6	28	7	12	2	0	0	3	0	0	0	0	0	4	0	1	1	10	5	8	0	0	0
ENSCPOP00000007630	pep:novel scaffold:cavPor3:scaffold_10:34101089:34115102:1 gene:ENSCPOG00000008488 transcript:ENSCPOT00000008565	K166	Acetylation	100% (1,000.00)	1	16	0	40	0	6	0	20	0	3	0	9	0	22	0	6	0	2	0	14	0	24	0	4	0
ENSCPOP00000007630	pep:novel scaffold:cavPor3:scaffold_10:34101089:34115102:1 gene:ENSCPOG00000008488 transcript:ENSCPOT00000008565	K256	Acetylation	100% (1,000.00)	1	8	8	40	10	4	2	0	5	3	3	9	18	0	11	6	0	1	1	7	0	12	24	4	0
ENSCPOP00000007630	pep:novel scaffold:cavPor3:scaffold_10:34101089:34115102:1 gene:ENSCPOG00000008488 transcript:ENSCPOT00000008565	K133	Acetylation	100% (1,000.00)	1	12	0	65	0	2	0	4	0	14	0	14	0	30	9	0	0	4	0	18	4	34	7	3	0
ENSCPOP00000007630	pep:novel scaffold:cavPor3:scaffold_10:34101089:34115102:1 gene:ENSCPOG00000008488 transcript:ENSCPOT00000008565	K272	Acetylation	100% (65.94)	1	66	0	0	0	8	2	0	0	6	12	0	15	0	0	0	5	1	3	17	22	26	35	0	8
ENSCPOP00000007630	pep:novel scaffold:cavPor3:scaffold_10:34101089:34115102:1 gene:ENSCPOG00000008488 transcript:ENSCPOT00000008565	K80	Acetylation	100% (1,000.00)	1	0	0	0	0	10	12	0	0	12	15	21	7	0	0	10	5	5	6	18	6	24	52	9	16
ENSCPOP00000007630	pep:novel scaffold:cavPor3:scaffold_10:34101089:34115102:1 gene:ENSCPOG00000008488 transcript:ENSCPOT00000008565	K447	Acetylation	100% (119.59)	1	58	7	42	14	6	2	11	1	3	3	16	20	6	6	0	0	1	1	6	8	8	7	0	4
ENSCPOP00000007630	pep:novel scaffold:cavPor3:scaffold_10:34101089:34115102:1 gene:ENSCPOG00000008488 transcript:ENSCPOT00000008565	K384	Acetylation	100% (1,000.00)	1	40	8	50	10	4	4	10	5	0	3	9	9	11	22	6	6	2	1	7	7	12	24	4	0
ENSCPOP00000007630	pep:novel scaffold:cavPor3:scaffold_10:34101089:34115102:1 gene:ENSCPOG00000008488 transcript:ENSCPOT00000008565	K275	Acetylation	100% (109.09)	1	54	0	50	0	15	2	10	7	12	7	29	36	0	0	6	0	2	2	15	29	14	22	4	8
ENSCPOP00000007630	pep:novel scaffold:cavPor3:scaffold_10:34101089:34115102:1 gene:ENSCPOG00000008488 transcript:ENSCPOT00000008565	K155	Acetylation	100% (1,000.00)	1	56	6	64	18	8	0	4	5	3	3	16	16	9	0	6	6	2	2	12	12	52	20	4	4
ENSCPOP00000007630	pep:novel scaffold:cavPor3:scaffold_10:34101089:34115102:1 gene:ENSCPOG00000008488 transcript:ENSCPOT00000008565	K282	Acetylation	100% (1,000.00)	1	99	0	36	0	30	0	45	0	18	1	90	0	15	0	6	0	3	0	35	7	52	0	8	2
ENSCPOP00000007630	pep:novel scaffold:cavPor3:scaffold_10:34101089:34115102:1 gene:ENSCPOG00000008488 transcript:ENSCPOT00000008565	K199	Acetylation	100% (91.76)	1	104	16	70	20	18	4	20	5	12	6	36	36	22	11	12	12	3	4	42	28	12	36	8	8
ENSCPOP00000007630	pep:novel scaffold:cavPor3:scaffold_10:34101089:34115102:1 gene:ENSCPOG00000008488 transcript:ENSCPOT00000008565	K48	Acetylation	100% (1,000.00)	1	112	16	50	20	28	4	0	5	15	9	59	27	0	0	0	12	6	5	37	33	49	51	8	8
ENSCPOP00000007630	pep:novel scaffold:cavPor3:scaffold_10:34101089:34115102:1 gene:ENSCPOG00000008488 transcript:ENSCPOT00000008565	K413	Acetylation	100% (57.03)	1	135	0	141	0	20	2	15	15	3	6	42	27	11	22	6	12	3	2	22	7	44	44	4	4
ENSCPOP00000007630	pep:novel scaffold:cavPor3:scaffold_10:34101089:34115102:1 gene:ENSCPOG00000008488 transcript:ENSCPOT00000008565	K400	Acetylation	100% (224.30)	1	101	21	150	18	30	4	20	5	3	9	28	24	28	20	0	0	3	2	22	18	56	49	4	0
ENSCPOP00000007630	pep:novel scaffold:cavPor3:scaffold_10:34101089:34115102:1 gene:ENSCPOG00000008488 transcript:ENSCPOT00000008565	K106	Acetylation	100% (84.67)	1	56	7	63	18	20	10	8	0	9	51	56	64	40	10	5	0	17	20	60	36	288	267	0	0
ENSCPOP00000007630	pep:novel scaffold:cavPor3:scaffold_10:34101089:34115102:1 gene:ENSCPOG00000008488 transcript:ENSCPOT00000008565	K180	Acetylation	100% (1,000.00)	1	168	48	230	70	24	12	35	20	21	18	54	54	55	88	6	24	6	6	35	63	84	96	8	20
ENSCPOP00000007694	pep:novel scaffold:cavPor3:scaffold_52:8814777:8838768:-1 gene:ENSCPOG00000008562 transcript:ENSCPOT00000008639	K366	Acetylation	100% (1,000.00)	1	0	0	0	0	0	1	0	0	0	0	0	0	0	0	0	0	0	0	0	0	0	0	0	0
ENSCPOP00000007694	pep:novel scaffold:cavPor3:scaffold_52:8814777:8838768:-1 gene:ENSCPOG00000008562 transcript:ENSCPOT00000008639	K34	Acetylation	100% (1,000.00)	1	0	0	0	0	0	2	0	0	0	3	0	0	0	0	0	0	1	1	0	0	0	0	0	0
ENSCPOP00000007712	pep:novel scaffold:cavPor3:scaffold_70:5344135:5365200:1 gene:ENSCPOG00000008583 transcript:ENSCPOT00000008660	K253	Acetylation	100% (90.09)	1	0	0	0	0	2	0	0	0	0	0	0	0	0	0	0	0	0	0	0	0	0	0	0	0
ENSCPOP00000007733	pep:novel scaffold:cavPor3:scaffold_42:5597099:5610003:-1 gene:ENSCPOG00000008604 transcript:ENSCPOT00000008682	K794	Acetylation	100% (1,000.00)	1	0	0	0	0	0	0	0	1	0	0	0	0	0	0	0	0	0	0	0	0	0	0	0	0
ENSCPOP00000007733	pep:novel scaffold:cavPor3:scaffold_42:5597099:5610003:-1 gene:ENSCPOG00000008604 transcript:ENSCPOT00000008682	K812	Acetylation	100% (1,000.00)	1	0	0	0	0	0	0	2	0	0	0	0	0	0	0	0	0	0	0	0	0	0	0	0	0
ENSCPOP00000007733	pep:novel scaffold:cavPor3:scaffold_42:5597099:5610003:-1 gene:ENSCPOG00000008604 transcript:ENSCPOT00000008682	K291	Acetylation	100% (1,000.00)	1	0	0	0	0	0	0	3	0	0	0	0	0	0	0	0	0	0	0	0	0	0	0	0	0
ENSCPOP00000007755	pep:novel scaffold:cavPor3:scaffold_1:33030942:33052447:-1 gene:ENSCPOG00000008633 transcript:ENSCPOT00000008711	K290	Acetylation	100% (1,000.00)	1	0	0	0	0	3	1	0	0	0	2	0	0	0	0	0	0	0	0	0	0	0	0	0	0
ENSCPOP00000007755	pep:novel scaffold:cavPor3:scaffold_1:33030942:33052447:-1 gene:ENSCPOG00000008633 transcript:ENSCPOT00000008711	K318	Acetylation	100% (71.66)	1	0	0	0	0	2	0	0	0	6	0	0	0	0	0	0	0	1	0	0	0	0	0	0	0
ENSCPOP00000007766	pep:novel scaffold:cavPor3:scaffold_25:11776735:11789773:1 gene:ENSCPOG00000008645 transcript:ENSCPOT00000008723	K48	Acetylation	100% (133.60)	1	0	0	0	2	0	0	0	0	0	0	0	0	0	0	0	0	0	0	0	0	0	0	0	0
ENSCPOP00000007975	pep:novel scaffold:cavPor3:scaffold_3:2177436:2208713:1 gene:ENSCPOG00000008879 transcript:ENSCPOT00000008959	K267	Acetylation	100% (49.95)	1	0	0	0	0	0	0	0	0	0	0	0	0	0	0	0	0	0	1	0	0	0	0	0	0
ENSCPOP00000007975	pep:novel scaffold:cavPor3:scaffold_3:2177436:2208713:1 gene:ENSCPOG00000008879 transcript:ENSCPOT00000008959	K257	Acetylation	100% (46.15)	1	0	0	0	0	0	0	0	0	0	0	0	0	0	0	0	0	0	1	0	0	0	0	0	0
ENSCPOP00000007975	pep:novel scaffold:cavPor3:scaffold_3:2177436:2208713:1 gene:ENSCPOG00000008879 transcript:ENSCPOT00000008959	K55	Acetylation	100% (1,000.00)	1	4	0	0	0	0	0	0	0	0	0	0	0	0	0	0	0	0	0	0	0	1	0	0	0
ENSCPOP00000007975	pep:novel scaffold:cavPor3:scaffold_3:2177436:2208713:1 gene:ENSCPOG00000008879 transcript:ENSCPOT00000008959	K353	Acetylation	100% (1,000.00)	1	0	0	0	0	1	0	0	0	0	0	2	0	0	0	0	0	0	0	0	0	3	3	0	0
ENSCPOP00000008014	pep:novel scaffold:cavPor3:scaffold_150:1970861:1992859:-1 gene:ENSCPOG00000008921 transcript:ENSCPOT00000009001	K621	Acetylation	100% (54.22)	1	1	0	0	0	0	0	0	0	0	0	0	0	0	0	0	0	0	0	0	0	0	0	0	0
ENSCPOP00000008014	pep:novel scaffold:cavPor3:scaffold_150:1970861:1992859:-1 gene:ENSCPOG00000008921 transcript:ENSCPOT00000009001	K523	Acetylation	100% (100.79)	1	0	0	0	0	0	0	0	0	0	0	0	0	0	0	0	0	0	0	0	0	0	1	0	0
ENSCPOP00000008014	pep:novel scaffold:cavPor3:scaffold_150:1970861:1992859:-1 gene:ENSCPOG00000008921 transcript:ENSCPOT00000009001	K483	Acetylation	100% (59.66)	1	1	0	0	0	0	0	0	0	0	0	0	0	0	0	0	0	0	0	1	0	0	0	0	0
ENSCPOP00000008014	pep:novel scaffold:cavPor3:scaffold_150:1970861:1992859:-1 gene:ENSCPOG00000008921 transcript:ENSCPOT00000009001	K502	Acetylation	100% (1,000.00)	1	2	0	0	0	0	1	0	0	0	0	0	3	0	0	0	0	0	0	0	0	0	0	0	0
ENSCPOP00000008014	pep:novel scaffold:cavPor3:scaffold_150:1970861:1992859:-1 gene:ENSCPOG00000008921 transcript:ENSCPOT00000009001	K535	Acetylation	100% (1,000.00)	1	8	0	0	0	0	0	0	0	0	0	0	0	0	0	0	0	0	0	1	0	3	0	0	0
ENSCPOP00000008014	pep:novel scaffold:cavPor3:scaffold_150:1970861:1992859:-1 gene:ENSCPOG00000008921 transcript:ENSCPOT00000009001	K407	Acetylation	100% (1,000.00)	1	8	0	0	0	0	0	0	0	0	0	0	3	0	0	0	0	0	0	1	1	0	0	0	0
ENSCPOP00000008014	pep:novel scaffold:cavPor3:scaffold_150:1970861:1992859:-1 gene:ENSCPOG00000008921 transcript:ENSCPOT00000009001	K492	Acetylation	100% (1,000.00)	1	0	0	6	3	0	0	1	0	0	0	2	2	4	4	0	0	0	0	0	0	5	5	0	0
ENSCPOP00000008014	pep:novel scaffold:cavPor3:scaffold_150:1970861:1992859:-1 gene:ENSCPOG00000008921 transcript:ENSCPOT00000009001	K593	Acetylation	100% (147.31)	1	50	16	96	34	0	6	21	15	3	6	15	39	27	32	12	12	2	3	14	21	18	42	8	4
ENSCPOP00000008015	pep:known scaffold:cavPor3:scaffold_150:1972806:1991339:-1 gene:ENSCPOG00000008921 transcript:ENSCPOT00000009002	K438	Acetylation	100% (59.66)	1	1	0	0	0	0	0	0	0	0	0	0	0	0	0	0	0	0	0	1	0	0	0	0	0
ENSCPOP00000008015	pep:known scaffold:cavPor3:scaffold_150:1972806:1991339:-1 gene:ENSCPOG00000008921 transcript:ENSCPOT00000009002	K457	Acetylation	100% (1,000.00)	1	1	0	0	0	0	0	0	0	0	0	0	3	0	0	0	0	0	0	0	0	0	0	0	0
ENSCPOP00000008015	pep:known scaffold:cavPor3:scaffold_150:1972806:1991339:-1 gene:ENSCPOG00000008921 transcript:ENSCPOT00000009002	K447	Acetylation	100% (1,000.00)	1	0	0	0	0	0	0	0	0	0	0	1	2	0	0	0	0	0	0	0	0	5	0	0	0
ENSCPOP00000008015	pep:known scaffold:cavPor3:scaffold_150:1972806:1991339:-1 gene:ENSCPOG00000008921 transcript:ENSCPOT00000009002	K490	Acetylation	100% (1,000.00)	1	8	0	0	0	0	0	0	0	0	0	0	0	0	0	0	0	0	0	1	0	3	0	0	0
ENSCPOP00000008015	pep:known scaffold:cavPor3:scaffold_150:1972806:1991339:-1 gene:ENSCPOG00000008921 transcript:ENSCPOT00000009002	K363	Acetylation	100% (1,000.00)	1	8	0	0	0	0	0	0	0	0	0	0	3	0	0	0	0	0	0	1	1	0	0	0	0
ENSCPOP00000008015	pep:known scaffold:cavPor3:scaffold_150:1972806:1991339:-1 gene:ENSCPOG00000008921 transcript:ENSCPOT00000009002	K420	Acetylation	100% (78.92)	1	10	0	0	0	0	0	0	0	0	0	8	6	0	0	0	0	0	0	2	2	7	0	0	0
ENSCPOP00000008066	pep:novel scaffold:cavPor3:scaffold_11:4889709:4922479:-1 gene:ENSCPOG00000008978 transcript:ENSCPOT00000009060	K105	Acetylation	100% (149.60)	1	0	0	5	0	0	0	0	0	0	0	0	0	3	6	0	0	0	0	0	0	0	0	0	0
ENSCPOP00000008066	pep:novel scaffold:cavPor3:scaffold_11:4889709:4922479:-1 gene:ENSCPOG00000008978 transcript:ENSCPOT00000009060	K106	Acetylation	100% (134.35)	1	0	0	5	0	0	0	0	0	0	0	0	0	3	6	0	0	0	0	0	0	0	0	0	0
ENSCPOP00000008101	pep:novel scaffold:cavPor3:scaffold_5:61120435:61133739:-1 gene:ENSCPOG00000009020 transcript:ENSCPOT00000009103	K66	Acetylation	100% (1,000.00)	1	0	0	0	0	0	1	0	0	0	2	0	0	0	0	0	0	0	0	0	0	0	0	0	0
ENSCPOP00000008101	pep:novel scaffold:cavPor3:scaffold_5:61120435:61133739:-1 gene:ENSCPOG00000009020 transcript:ENSCPOT00000009103	K166	Acetylation	100% (124.20)	1	0	0	0	0	4	0	0	0	0	0	0	0	0	0	0	0	0	1	0	0	0	0	0	0
ENSCPOP00000008228	pep:novel scaffold:cavPor3:scaffold_22:23562397:23583692:1 gene:ENSCPOG00000009164 transcript:ENSCPOT00000009247	K202	Acetylation	100% (1,000.00)	1	1	0	0	0	0	0	0	0	0	0	0	0	0	0	0	0	0	0	0	0	0	2	0	0
ENSCPOP00000008228	pep:novel scaffold:cavPor3:scaffold_22:23562397:23583692:1 gene:ENSCPOG00000009164 transcript:ENSCPOT00000009247	K432	Acetylation	100% (1,000.00)	1	2	0	3	0	0	0	0	0	0	0	0	2	4	0	0	0	0	0	0	0	0	0	0	0
ENSCPOP00000008228	pep:novel scaffold:cavPor3:scaffold_22:23562397:23583692:1 gene:ENSCPOG00000009164 transcript:ENSCPOT00000009247	K389	Acetylation	100% (1,000.00)	1	2	0	0	0	0	0	0	0	0	0	0	0	0	0	0	0	1	0	1	0	8	0	0	0
ENSCPOP00000008228	pep:novel scaffold:cavPor3:scaffold_22:23562397:23583692:1 gene:ENSCPOG00000009164 transcript:ENSCPOT00000009247	K161	Acetylation	100% (1,000.00)	1	0	0	4	0	0	0	0	0	0	0	0	0	3	0	0	0	0	0	1	0	4	0	0	0
ENSCPOP00000008228	pep:novel scaffold:cavPor3:scaffold_22:23562397:23583692:1 gene:ENSCPOG00000009164 transcript:ENSCPOT00000009247	K304	Acetylation	100% (152.81)	1	0	1	4	1	0	0	0	0	0	0	0	0	6	4	0	0	0	0	0	0	8	5	0	0
ENSCPOP00000008228	pep:novel scaffold:cavPor3:scaffold_22:23562397:23583692:1 gene:ENSCPOG00000009164 transcript:ENSCPOT00000009247	K187	Acetylation	100% (239.67)	1	18	0	6	0	0	0	0	0	0	0	6	6	0	0	0	0	0	0	3	2	0	4	0	0
ENSCPOP00000008228	pep:novel scaffold:cavPor3:scaffold_22:23562397:23583692:1 gene:ENSCPOG00000009164 transcript:ENSCPOT00000009247	K122	Acetylation	100% (1,000.00)	1	10	0	16	4	0	0	1	0	0	0	3	3	0	0	0	0	0	0	0	0	0	10	0	0
ENSCPOP00000008228	pep:novel scaffold:cavPor3:scaffold_22:23562397:23583692:1 gene:ENSCPOG00000009164 transcript:ENSCPOT00000009247	K347	Acetylation	100% (1,000.00)	1	8	0	18	0	0	0	0	0	2	0	0	0	0	0	0	0	1	0	5	0	14	0	0	0
ENSCPOP00000008228	pep:novel scaffold:cavPor3:scaffold_22:23562397:23583692:1 gene:ENSCPOG00000009164 transcript:ENSCPOT00000009247	K90	Acetylation	100% (92.31)	1	23	0	0	0	2	2	0	0	0	3	8	18	2	0	0	0	0	1	0	9	0	0	0	0
ENSCPOP00000008228	pep:novel scaffold:cavPor3:scaffold_22:23562397:23583692:1 gene:ENSCPOG00000009164 transcript:ENSCPOT00000009247	K229	Acetylation	100% (102.40)	1	24	0	30	0	6	0	15	0	3	0	9	0	11	0	6	0	1	0	7	0	12	0	4	0
ENSCPOP00000008228	pep:novel scaffold:cavPor3:scaffold_22:23562397:23583692:1 gene:ENSCPOG00000009164 transcript:ENSCPOT00000009247	K398	Acetylation	100% (164.54)	1	24	12	8	8	9	0	3	3	3	2	5	7	9	9	0	4	1	0	14	0	16	10	0	0
ENSCPOP00000008228	pep:novel scaffold:cavPor3:scaffold_22:23562397:23583692:1 gene:ENSCPOG00000009164 transcript:ENSCPOT00000009247	K298	Acetylation	100% (117.87)	1	80	24	52	13	16	4	20	10	4	3	29	0	15	15	18	6	1	1	7	7	29	22	4	4
ENSCPOP00000008228	pep:novel scaffold:cavPor3:scaffold_22:23562397:23583692:1 gene:ENSCPOG00000009164 transcript:ENSCPOT00000009247	K311	Acetylation	100% (1,000.00)	1	82	15	79	7	14	0	15	3	0	6	21	30	29	8	0	0	1	2	15	12	32	35	0	0
ENSCPOP00000008228	pep:novel scaffold:cavPor3:scaffold_22:23562397:23583692:1 gene:ENSCPOG00000009164 transcript:ENSCPOT00000009247	K73	Acetylation	100% (1,000.00)	1	61	24	105	20	0	4	16	5	0	3	22	31	25	28	6	6	0	2	20	9	34	46	4	0
ENSCPOP00000008228	pep:novel scaffold:cavPor3:scaffold_22:23562397:23583692:1 gene:ENSCPOG00000009164 transcript:ENSCPOT00000009247	K406	Acetylation	100% (1,000.00)	1	84	7	99	18	16	2	25	5	6	3	24	24	21	13	0	0	3	1	18	12	46	48	8	4
ENSCPOP00000008240	pep:novel scaffold:cavPor3:scaffold_6:2945562:2947327:-1 gene:ENSCPOG00000009178 transcript:ENSCPOT00000009261	K75	Acetylation	100% (1,000.00)	1	0	0	3	0	0	0	0	0	0	0	0	0	0	0	0	0	0	0	0	0	2	0	0	0
ENSCPOP00000008332	pep:novel scaffold:cavPor3:scaffold_59:2045699:2060270:1 gene:ENSCPOG00000009280 transcript:ENSCPOT00000009365	K336	Acetylation	100% (52.50)	1	0	0	2	0	0	0	0	0	0	0	0	0	0	0	0	0	0	0	0	0	0	2	0	0
ENSCPOP00000008332	pep:novel scaffold:cavPor3:scaffold_59:2045699:2060270:1 gene:ENSCPOG00000009280 transcript:ENSCPOT00000009365	K63	Acetylation	100% (1,000.00)	1	8	0	0	0	0	0	1	1	0	0	0	5	0	0	2	0	0	0	0	3	0	6	0	0
ENSCPOP00000008332	pep:novel scaffold:cavPor3:scaffold_59:2045699:2060270:1 gene:ENSCPOG00000009280 transcript:ENSCPOT00000009365	K83	Acetylation	100% (59.79)	1	20	0	7	7	0	0	6	0	0	0	6	6	8	1	3	0	0	0	4	0	0	0	1	2
ENSCPOP00000008332	pep:novel scaffold:cavPor3:scaffold_59:2045699:2060270:1 gene:ENSCPOG00000009280 transcript:ENSCPOT00000009365	K244	Acetylation	100% (1,000.00)	1	0	0	7	7	0	1	6	3	0	0	0	6	0	8	4	4	0	0	5	5	9	9	2	2
ENSCPOP00000008332	pep:novel scaffold:cavPor3:scaffold_59:2045699:2060270:1 gene:ENSCPOG00000009280 transcript:ENSCPOT00000009365	K313	Acetylation	100% (1,000.00)	1	30	8	20	10	0	1	2	4	0	2	0	7	6	0	5	13	0	0	0	0	9	15	4	4
ENSCPOP00000008332	pep:novel scaffold:cavPor3:scaffold_59:2045699:2060270:1 gene:ENSCPOG00000009280 transcript:ENSCPOT00000009365	K77	Acetylation	100% (153.77)	1	122	7	113	20	8	4	55	9	0	6	49	17	51	32	16	11	2	2	13	37	23	57	19	5
ENSCPOP00000008332	pep:novel scaffold:cavPor3:scaffold_59:2045699:2060270:1 gene:ENSCPOG00000009280 transcript:ENSCPOT00000009365	K321	Acetylation	100% (1,000.00)	1	137	46	223	58	4	6	49	18	0	3	41	33	54	53	22	24	2	3	40	30	75	42	20	15
ENSCPOP00000008361	pep:novel scaffold:cavPor3:scaffold_20:18933903:18953714:1 gene:ENSCPOG00000009316 transcript:ENSCPOT00000009401	K308	Acetylation	100% (1,000.00)	1	5	0	10	0	0	0	0	0	0	0	0	0	0	0	0	0	0	0	0	0	0	0	0	0
ENSCPOP00000008361	pep:novel scaffold:cavPor3:scaffold_20:18933903:18953714:1 gene:ENSCPOG00000009316 transcript:ENSCPOT00000009401	K278	Acetylation	100% (231.46)	1	80	0	5	0	2	6	22	20	0	9	0	27	0	0	18	18	2	2	10	17	6	10	8	12
ENSCPOP00000008361	pep:novel scaffold:cavPor3:scaffold_20:18933903:18953714:1 gene:ENSCPOG00000009316 transcript:ENSCPOT00000009401	K268	Acetylation	100% (111.49)	1	89	16	64	10	18	4	43	14	11	3	54	17	22	10	9	11	3	2	20	13	23	11	11	7
ENSCPOP00000008445	pep:novel scaffold:cavPor3:scaffold_52:4653664:4667139:1 gene:ENSCPOG00000009404 transcript:ENSCPOT00000009489	K402	Acetylation	100% (1,000.00)	1	0	0	0	0	6	0	0	0	0	0	0	0	0	0	0	0	2	0	0	0	0	0	3	0
ENSCPOP00000008574	pep:novel scaffold:cavPor3:scaffold_143:1575063:1590511:-1 gene:ENSCPOG00000009552 transcript:ENSCPOT00000009638	K108	Acetylation	100% (43.82)	1	0	0	0	0	0	0	0	0	1	0	0	0	0	0	0	0	0	0	0	0	0	0	0	0
ENSCPOP00000008626	pep:novel scaffold:cavPor3:scaffold_20:18153323:18165051:1 gene:ENSCPOG00000009610 transcript:ENSCPOT00000009697	K165	Acetylation	100% (1,000.00)	1	0	0	0	0	0	0	0	0	0	0	1	0	0	0	0	0	0	0	0	0	0	0	0	0
ENSCPOP00000008701	pep:novel scaffold:cavPor3:scaffold_2:47513596:47554798:1 gene:ENSCPOG00000009695 transcript:ENSCPOT00000009782	K116	Acetylation	100% (70.86)	1	3	0	0	0	0	0	0	0	0	0	0	0	0	0	0	0	0	0	0	0	0	0	0	0
ENSCPOP00000008701	pep:novel scaffold:cavPor3:scaffold_2:47513596:47554798:1 gene:ENSCPOG00000009695 transcript:ENSCPOT00000009782	K108	Acetylation	100% (142.48)	1	4	0	0	0	0	0	0	0	1	0	0	0	0	0	0	0	0	0	0	0	0	0	0	0
ENSCPOP00000008856	pep:novel scaffold:cavPor3:scaffold_13:43106696:43133822:-1 gene:ENSCPOG00000009871 transcript:ENSCPOT00000009960	K229	Acetylation	100% (1,000.00)	1	2	0	0	0	0	0	0	0	0	0	0	0	0	0	0	0	0	0	0	0	0	0	0	0
ENSCPOP00000008856	pep:novel scaffold:cavPor3:scaffold_13:43106696:43133822:-1 gene:ENSCPOG00000009871 transcript:ENSCPOT00000009960	K333	Acetylation	100% (1,000.00)	1	0	0	0	0	0	0	0	0	0	0	0	0	0	0	0	0	1	1	0	2	0	0	0	0
ENSCPOP00000008856	pep:novel scaffold:cavPor3:scaffold_13:43106696:43133822:-1 gene:ENSCPOG00000009871 transcript:ENSCPOT00000009960	K41	Acetylation	100% (165.32)	1	0	0	6	0	10	0	0	0	6	0	5	0	7	0	0	0	1	0	4	0	0	0	0	0
ENSCPOP00000008856	pep:novel scaffold:cavPor3:scaffold_13:43106696:43133822:-1 gene:ENSCPOG00000009871 transcript:ENSCPOT00000009960	K67	Acetylation	100% (48.33)	1	4	0	12	0	6	0	0	0	0	0	5	0	7	0	0	0	1	0	3	0	8	0	0	0
ENSCPOP00000008856	pep:novel scaffold:cavPor3:scaffold_13:43106696:43133822:-1 gene:ENSCPOG00000009871 transcript:ENSCPOT00000009960	K254	Acetylation	100% (1,000.00)	1	20	0	12	0	12	0	0	0	0	3	0	5	0	0	0	0	3	1	0	0	0	14	0	0
ENSCPOP00000008856	pep:novel scaffold:cavPor3:scaffold_13:43106696:43133822:-1 gene:ENSCPOG00000009871 transcript:ENSCPOT00000009960	K297	Acetylation	100% (77.61)	1	44	6	24	0	14	4	4	0	6	9	7	12	0	0	0	0	3	2	5	5	0	9	0	0
ENSCPOP00000008856	pep:novel scaffold:cavPor3:scaffold_13:43106696:43133822:-1 gene:ENSCPOG00000009871 transcript:ENSCPOT00000009960	K56	Acetylation	100% (1,000.00)	1	42	0	54	0	20	0	16	0	9	0	22	0	34	0	10	0	4	0	22	0	35	11	0	0
ENSCPOP00000009119	pep:novel scaffold:cavPor3:scaffold_9:6540988:6561102:1 gene:ENSCPOG00000010154 transcript:ENSCPOT00000010247	K102	Acetylation	100% (1,000.00)	1	0	0	0	0	0	0	0	0	0	0	0	0	0	0	0	0	0	0	0	1	0	0	0	0
ENSCPOP00000009119	pep:novel scaffold:cavPor3:scaffold_9:6540988:6561102:1 gene:ENSCPOG00000010154 transcript:ENSCPOT00000010247	K44	Acetylation	100% (57.67)	1	0	0	0	0	0	0	0	0	0	0	0	2	0	0	0	0	0	0	0	2	0	0	0	0
ENSCPOP00000009167	pep:novel scaffold:cavPor3:scaffold_107:2720121:2755930:1 gene:ENSCPOG00000010206 transcript:ENSCPOT00000010299	K189	Acetylation	100% (1,000.00)	1	3	0	0	0	0	0	0	0	0	0	0	0	0	0	0	0	0	0	0	0	0	2	0	0
ENSCPOP00000009440	pep:novel scaffold:cavPor3:scaffold_80:560729:570896:-1 gene:ENSCPOG00000010512 transcript:ENSCPOT00000010607	K28	Acetylation	100% (83.57)	1	0	0	0	0	0	0	0	0	0	0	0	0	0	0	0	0	0	0	0	0	0	0	1	0
ENSCPOP00000009440	pep:novel scaffold:cavPor3:scaffold_80:560729:570896:-1 gene:ENSCPOG00000010512 transcript:ENSCPOT00000010607	K115	Acetylation	100% (1,000.00)	1	0	0	0	0	0	0	0	0	0	0	0	2	0	0	0	0	0	0	0	1	0	0	0	0
ENSCPOP00000009440	pep:novel scaffold:cavPor3:scaffold_80:560729:570896:-1 gene:ENSCPOG00000010512 transcript:ENSCPOT00000010607	K119	Acetylation	100% (1,000.00)	1	0	0	0	0	0	0	0	0	0	0	0	2	0	0	0	0	0	0	0	1	0	0	0	0
ENSCPOP00000009440	pep:novel scaffold:cavPor3:scaffold_80:560729:570896:-1 gene:ENSCPOG00000010512 transcript:ENSCPOT00000010607	K226	Acetylation	100% (1,000.00)	1	0	0	0	0	0	0	2	0	0	0	0	4	0	0	3	0	0	0	0	0	0	0	0	1
ENSCPOP00000009440	pep:novel scaffold:cavPor3:scaffold_80:560729:570896:-1 gene:ENSCPOG00000010512 transcript:ENSCPOT00000010607	K20	Acetylation	100% (129.48)	1	0	0	0	0	0	0	6	2	0	0	0	0	0	0	3	0	0	0	0	0	0	0	0	1
ENSCPOP00000009440	pep:novel scaffold:cavPor3:scaffold_80:560729:570896:-1 gene:ENSCPOG00000010512 transcript:ENSCPOT00000010607	K15	Acetylation	100% (131.88)	1	0	0	0	4	0	0	2	0	0	0	3	3	0	0	0	0	0	0	2	0	0	0	0	0
ENSCPOP00000009440	pep:novel scaffold:cavPor3:scaffold_80:560729:570896:-1 gene:ENSCPOG00000010512 transcript:ENSCPOT00000010607	K63	Acetylation	100% (224.04)	1	10	0	7	0	0	0	6	2	0	0	0	6	8	0	3	3	0	0	8	4	0	0	1	1
ENSCPOP00000009450	pep:novel scaffold:cavPor3:scaffold_16:15526444:15534756:-1 gene:ENSCPOG00000010523 transcript:ENSCPOT00000010618	K30	Acetylation	100% (82.83)	1	0	0	0	0	0	0	0	0	0	0	1	0	0	0	0	0	0	0	0	0	0	0	0	0
ENSCPOP00000009450	pep:novel scaffold:cavPor3:scaffold_16:15526444:15534756:-1 gene:ENSCPOG00000010523 transcript:ENSCPOT00000010618	K45	Acetylation	100% (1,000.00)	1	0	0	2	0	0	0	0	0	0	0	0	0	0	0	1	0	0	0	0	0	0	0	0	0
ENSCPOP00000009450	pep:novel scaffold:cavPor3:scaffold_16:15526444:15534756:-1 gene:ENSCPOG00000010523 transcript:ENSCPOT00000010618	K20	Acetylation	100% (65.02)	1	0	0	0	0	0	0	0	0	0	0	2	0	0	0	0	0	0	0	1	0	0	0	0	0
ENSCPOP00000009450	pep:novel scaffold:cavPor3:scaffold_16:15526444:15534756:-1 gene:ENSCPOG00000010523 transcript:ENSCPOT00000010618	K36	Acetylation	100% (1,000.00)	1	2	0	0	0	0	0	0	0	0	0	0	3	0	0	0	0	0	0	1	1	0	0	0	0
ENSCPOP00000009450	pep:novel scaffold:cavPor3:scaffold_16:15526444:15534756:-1 gene:ENSCPOG00000010523 transcript:ENSCPOT00000010618	K96	Acetylation	100% (110.25)	1	0	2	4	4	0	0	0	0	0	0	3	0	0	0	0	0	0	0	1	0	5	0	0	0
ENSCPOP00000009450	pep:novel scaffold:cavPor3:scaffold_16:15526444:15534756:-1 gene:ENSCPOG00000010523 transcript:ENSCPOT00000010618	K64	Acetylation	100% (104.77)	1	20	0	7	0	0	0	6	2	0	0	6	6	0	8	3	3	0	0	4	4	9	9	0	1
ENSCPOP00000009450	pep:novel scaffold:cavPor3:scaffold_16:15526444:15534756:-1 gene:ENSCPOG00000010523 transcript:ENSCPOT00000010618	K135	Acetylation	100% (1,000.00)	1	8	4	30	0	0	0	2	2	0	0	10	5	14	7	3	3	0	0	0	0	24	16	1	1
ENSCPOP00000009458	pep:novel scaffold:cavPor3:scaffold_4:44688181:44692956:1 gene:ENSCPOG00000010534 transcript:ENSCPOT00000010629	K342	Acetylation	100% (48.84)	1	0	0	0	0	0	0	0	0	0	0	0	0	0	0	0	0	0	0	0	1	0	0	0	0
ENSCPOP00000009458	pep:novel scaffold:cavPor3:scaffold_4:44688181:44692956:1 gene:ENSCPOG00000010534 transcript:ENSCPOT00000010629	K256	Acetylation	100% (1,000.00)	1	15	0	20	0	1	0	0	0	0	0	0	0	0	0	0	0	0	0	2	0	0	0	0	0
ENSCPOP00000009597	pep:novel scaffold:cavPor3:scaffold_321:211223:393569:-1 gene:ENSCPOG00000010695 transcript:ENSCPOT00000010792	K438	Acetylation	100% (68.07)	1	0	0	0	0	0	0	0	0	0	0	0	0	0	0	0	2	0	0	0	0	0	0	0	1
ENSCPOP00000009610	pep:novel scaffold:cavPor3:scaffold_26:21551142:21625367:1 gene:ENSCPOG00000010708 transcript:ENSCPOT00000010805	K134	Acetylation	100% (1,000.00)	1	1	0	0	0	0	0	0	0	0	0	0	0	0	0	0	0	0	0	0	0	0	0	0	0
ENSCPOP00000009610	pep:novel scaffold:cavPor3:scaffold_26:21551142:21625367:1 gene:ENSCPOG00000010708 transcript:ENSCPOT00000010805	K268	Acetylation	100% (1,000.00)	1	9	0	2	0	0	0	0	0	0	0	0	0	0	0	0	0	0	0	0	0	0	0	0	0
ENSCPOP00000009620	pep:novel scaffold:cavPor3:scaffold_115:2427099:2431032:-1 gene:ENSCPOG00000010717 transcript:ENSCPOT00000010815	K46	Acetylation	100% (1,000.00)	1	0	0	1	0	0	0	0	0	0	0	0	0	0	0	0	0	0	0	0	0	0	0	0	0
ENSCPOP00000009620	pep:novel scaffold:cavPor3:scaffold_115:2427099:2431032:-1 gene:ENSCPOG00000010717 transcript:ENSCPOT00000010815	K165	Acetylation	100% (1,000.00)	1	0	0	1	0	0	0	0	0	0	0	0	0	4	0	0	0	0	0	0	0	9	9	0	0
ENSCPOP00000009655	pep:novel scaffold:cavPor3:scaffold_48:1736056:1745695:-1 gene:ENSCPOG00000010755 transcript:ENSCPOT00000010853	K73	Acetylation	100% (109.23)	1	0	0	0	0	6	0	0	0	0	0	0	0	0	0	0	0	0	0	0	0	0	0	0	0
ENSCPOP00000009655	pep:novel scaffold:cavPor3:scaffold_48:1736056:1745695:-1 gene:ENSCPOG00000010755 transcript:ENSCPOT00000010853	K118	Acetylation	100% (58.33)	1	0	0	0	0	2	2	4	0	0	6	0	0	0	0	0	0	1	0	0	0	0	0	0	0
ENSCPOP00000009761	pep:novel scaffold:cavPor3:scaffold_7:60678762:60735393:1 gene:ENSCPOG00000010866 transcript:ENSCPOT00000010966	K295	Acetylation	100% (1,000.00)	1	6	0	0	0	0	0	0	0	0	0	2	2	0	0	0	0	0	0	0	0	0	0	0	0
ENSCPOP00000009794	pep:novel scaffold:cavPor3:scaffold_98:1033898:1057934:1 gene:ENSCPOG00000010901 transcript:ENSCPOT00000011002	K152	Acetylation	100% (1,000.00)	1	0	0	0	0	0	0	0	0	0	0	0	0	0	0	0	0	1	0	0	0	0	2	0	0
ENSCPOP00000009794	pep:novel scaffold:cavPor3:scaffold_98:1033898:1057934:1 gene:ENSCPOG00000010901 transcript:ENSCPOT00000011002	K161	Acetylation	100% (1,000.00)	1	0	0	0	0	0	0	0	0	0	0	0	0	1	0	0	0	0	0	0	0	0	2	0	0
ENSCPOP00000009794	pep:novel scaffold:cavPor3:scaffold_98:1033898:1057934:1 gene:ENSCPOG00000010901 transcript:ENSCPOT00000011002	K112	Acetylation	100% (121.66)	1	0	0	0	0	6	2	0	0	3	0	0	0	0	0	0	0	1	0	0	0	1	0	0	0
ENSCPOP00000009794	pep:novel scaffold:cavPor3:scaffold_98:1033898:1057934:1 gene:ENSCPOG00000010901 transcript:ENSCPOT00000011002	K118	Acetylation	100% (1,000.00)	1	0	0	8	0	10	0	0	0	6	0	0	0	0	0	0	0	1	0	0	0	10	5	0	0
ENSCPOP00000009821	pep:novel scaffold:cavPor3:scaffold_13:16632206:16634297:1 gene:ENSCPOG00000010930 transcript:ENSCPOT00000011031	K48	Acetylation	100% (90.56)	1	0	0	0	0	0	0	0	0	0	1	0	0	0	0	0	0	1	0	0	0	0	0	0	0
ENSCPOP00000009899	pep:novel scaffold:cavPor3:scaffold_4:18979981:19032554:-1 gene:ENSCPOG00000011013 transcript:ENSCPOT00000011114	K507	Acetylation	100% (1,000.00)	1	0	0	0	0	0	0	0	0	0	0	0	0	0	0	0	0	2	0	0	0	0	0	0	0
ENSCPOP00000009899	pep:novel scaffold:cavPor3:scaffold_4:18979981:19032554:-1 gene:ENSCPOG00000011013 transcript:ENSCPOT00000011114	K154	Acetylation	100% (1,000.00)	1	25	0	0	0	8	0	0	0	6	3	12	0	0	0	0	0	1	1	4	4	7	0	0	0
ENSCPOP00000009899	pep:novel scaffold:cavPor3:scaffold_4:18979981:19032554:-1 gene:ENSCPOG00000011013 transcript:ENSCPOT00000011114	K159	Acetylation	100% (1,000.00)	1	86	0	0	0	22	0	12	0	12	12	19	0	0	0	0	0	6	4	14	14	20	2	0	0
ENSCPOP00000010012	pep:novel scaffold:cavPor3:scaffold_2:59559624:59581421:-1 gene:ENSCPOG00000011134 transcript:ENSCPOT00000011238	K414	Acetylation	100% (1,000.00)	1	0	0	0	0	0	0	0	0	0	0	0	0	0	0	0	0	0	0	1	0	0	0	0	0
ENSCPOP00000010012	pep:novel scaffold:cavPor3:scaffold_2:59559624:59581421:-1 gene:ENSCPOG00000011134 transcript:ENSCPOT00000011238	K297	Acetylation	100% (1,000.00)	1	0	0	0	0	0	0	0	0	0	0	0	0	0	0	0	0	0	0	0	2	0	0	0	0
ENSCPOP00000010012	pep:novel scaffold:cavPor3:scaffold_2:59559624:59581421:-1 gene:ENSCPOG00000011134 transcript:ENSCPOT00000011238	K79	Acetylation	100% (1,000.00)	1	0	0	0	0	1	0	0	0	0	0	2	2	0	0	0	0	0	0	0	0	0	0	0	0
ENSCPOP00000010012	pep:novel scaffold:cavPor3:scaffold_2:59559624:59581421:-1 gene:ENSCPOG00000011134 transcript:ENSCPOT00000011238	K252	Acetylation	100% (74.74)	1	2	0	0	0	0	0	0	0	0	0	3	3	0	0	0	0	0	0	0	1	0	0	0	0
ENSCPOP00000010077	pep:novel scaffold:cavPor3:scaffold_7:51643403:51650183:1 gene:ENSCPOG00000011207 transcript:ENSCPOT00000011313	K130	Acetylation	100% (1,000.00)	1	0	0	0	0	0	0	0	0	1	1	0	0	0	0	0	0	0	0	0	0	0	0	0	0
ENSCPOP00000010137	pep:novel scaffold:cavPor3:scaffold_5:23906759:24283840:-1 gene:ENSCPOG00000011274 transcript:ENSCPOT00000011380	K495	Acetylation	100% (43.82)	1	0	0	0	0	0	0	0	0	0	0	0	0	0	0	0	0	0	0	0	1	0	0	0	0
ENSCPOP00000010137	pep:novel scaffold:cavPor3:scaffold_5:23906759:24283840:-1 gene:ENSCPOG00000011274 transcript:ENSCPOT00000011380	K90	Acetylation	100% (1,000.00)	1	24	0	0	0	3	0	0	0	2	0	0	0	0	0	0	0	0	0	0	3	0	0	0	0
ENSCPOP00000010265	pep:novel scaffold:cavPor3:scaffold_90:789763:796018:1 gene:ENSCPOG00000011419 transcript:ENSCPOT00000011525	K121	Acetylation	100% (77.15)	1	0	0	2	0	0	0	0	0	0	0	0	0	0	0	0	0	0	0	0	0	0	0	0	0
ENSCPOP00000010265	pep:novel scaffold:cavPor3:scaffold_90:789763:796018:1 gene:ENSCPOG00000011419 transcript:ENSCPOT00000011525	K146	Acetylation	100% (61.71)	1	1	0	4	0	0	0	0	0	0	0	0	0	0	0	0	0	0	0	0	0	0	0	0	0
ENSCPOP00000010265	pep:novel scaffold:cavPor3:scaffold_90:789763:796018:1 gene:ENSCPOG00000011419 transcript:ENSCPOT00000011525	K208	Acetylation	100% (118.79)	1	0	0	0	0	8	0	0	0	6	0	0	0	0	0	0	0	1	0	4	0	5	0	0	0
ENSCPOP00000010265	pep:novel scaffold:cavPor3:scaffold_90:789763:796018:1 gene:ENSCPOG00000011419 transcript:ENSCPOT00000011525	K105	Acetylation	100% (1,000.00)	1	12	0	0	0	0	4	0	0	0	0	0	5	0	0	0	0	0	2	0	3	0	12	0	0
ENSCPOP00000010265	pep:novel scaffold:cavPor3:scaffold_90:789763:796018:1 gene:ENSCPOG00000011419 transcript:ENSCPOT00000011525	K156	Acetylation	100% (1,000.00)	1	30	10	28	14	10	2	0	0	3	0	6	6	9	16	0	0	1	1	4	8	9	18	0	0
ENSCPOP00000010349	pep:novel scaffold:cavPor3:scaffold_321:65916:79243:-1 gene:ENSCPOG00000011506 transcript:ENSCPOT00000011614	K507	Acetylation	100% (1,000.00)	1	0	0	0	0	0	0	0	0	0	0	0	1	0	0	0	0	0	0	0	0	0	0	0	0
ENSCPOP00000010349	pep:novel scaffold:cavPor3:scaffold_321:65916:79243:-1 gene:ENSCPOG00000011506 transcript:ENSCPOT00000011614	K446	Acetylation	100% (95.73)	1	0	0	0	0	0	0	0	0	0	0	0	2	0	0	0	0	0	0	2	0	0	0	0	0
ENSCPOP00000010349	pep:novel scaffold:cavPor3:scaffold_321:65916:79243:-1 gene:ENSCPOG00000011506 transcript:ENSCPOT00000011614	K411	Acetylation	100% (91.76)	1	0	0	0	0	0	0	0	0	0	0	2	0	0	0	0	0	0	0	0	1	0	3	0	0
ENSCPOP00000010349	pep:novel scaffold:cavPor3:scaffold_321:65916:79243:-1 gene:ENSCPOG00000011506 transcript:ENSCPOT00000011614	K503	Acetylation	100% (1,000.00)	1	0	0	0	0	0	0	0	0	0	0	1	0	2	0	0	0	0	0	0	0	0	3	0	0
ENSCPOP00000010349	pep:novel scaffold:cavPor3:scaffold_321:65916:79243:-1 gene:ENSCPOG00000011506 transcript:ENSCPOT00000011614	K232	Acetylation	100% (1,000.00)	1	0	0	0	0	0	0	0	0	0	0	0	2	3	3	0	0	0	0	0	1	0	0	0	0
ENSCPOP00000010349	pep:novel scaffold:cavPor3:scaffold_321:65916:79243:-1 gene:ENSCPOG00000011506 transcript:ENSCPOT00000011614	K417	Acetylation	100% (123.60)	1	8	0	0	0	0	0	0	0	0	0	0	0	0	0	0	0	0	0	1	1	0	0	0	0
ENSCPOP00000010349	pep:novel scaffold:cavPor3:scaffold_321:65916:79243:-1 gene:ENSCPOG00000011506 transcript:ENSCPOT00000011614	K537	Acetylation	100% (1,000.00)	1	10	0	4	0	0	0	0	0	0	0	0	3	0	0	0	0	0	0	2	0	0	5	0	0
ENSCPOP00000010349	pep:novel scaffold:cavPor3:scaffold_321:65916:79243:-1 gene:ENSCPOG00000011506 transcript:ENSCPOT00000011614	K62	Acetylation	100% (1,000.00)	1	8	0	24	0	0	0	0	0	0	0	3	0	10	5	0	0	0	0	1	1	6	6	0	0
ENSCPOP00000010440	pep:novel scaffold:cavPor3:scaffold_9:3588155:3594238:-1 gene:ENSCPOG00000011606 transcript:ENSCPOT00000011718	K217	Acetylation	100% (1,000.00)	1	0	0	0	0	0	0	0	0	0	0	0	0	2	0	0	0	0	0	1	0	0	0	0	0
ENSCPOP00000010440	pep:novel scaffold:cavPor3:scaffold_9:3588155:3594238:-1 gene:ENSCPOG00000011606 transcript:ENSCPOT00000011718	K308	Acetylation	100% (38.25)	1	2	0	0	0	0	0	0	0	0	0	3	0	0	0	0	0	0	0	1	0	0	0	0	0
ENSCPOP00000010440	pep:novel scaffold:cavPor3:scaffold_9:3588155:3594238:-1 gene:ENSCPOG00000011606 transcript:ENSCPOT00000011718	K233	Acetylation	100% (1,000.00)	1	12	0	16	4	0	0	0	0	0	0	0	6	0	0	0	0	0	0	1	3	11	11	0	0
ENSCPOP00000010440	pep:novel scaffold:cavPor3:scaffold_9:3588155:3594238:-1 gene:ENSCPOG00000011606 transcript:ENSCPOT00000011718	K208	Acetylation	100% (95.08)	1	21	0	29	10	0	0	0	0	0	0	4	8	9	12	0	0	0	0	3	5	11	18	0	1
ENSCPOP00000010543	pep:novel scaffold:cavPor3:scaffold_19:35747084:35775346:-1 gene:ENSCPOG00000011723 transcript:ENSCPOT00000011837	K633	Acetylation	100% (1,000.00)	1	1	0	0	0	0	0	0	0	0	0	0	0	0	0	0	0	0	0	0	0	0	0	0	0
ENSCPOP00000010543	pep:novel scaffold:cavPor3:scaffold_19:35747084:35775346:-1 gene:ENSCPOG00000011723 transcript:ENSCPOT00000011837	K458	Acetylation	100% (89.35)	1	96	0	89	26	0	0	38	8	0	6	43	30	0	29	0	15	0	3	16	6	41	39	10	9
ENSCPOP00000010693	pep:novel scaffold:cavPor3:scaffold_13:11543842:11552775:-1 gene:ENSCPOG00000011887 transcript:ENSCPOT00000012002	K792	Acetylation	100% (1,000.00)	1	0	0	0	0	0	0	3	0	0	0	0	0	0	0	4	0	1	0	0	0	0	0	2	0
ENSCPOP00000010693	pep:novel scaffold:cavPor3:scaffold_13:11543842:11552775:-1 gene:ENSCPOG00000011887 transcript:ENSCPOT00000012002	K330	Acetylation	100% (1,000.00)	1	0	0	0	0	4	4	16	0	0	0	0	0	0	0	0	0	2	1	0	0	0	0	0	3
ENSCPOP00000010702	pep:novel scaffold:cavPor3:scaffold_45:4541716:4573012:-1 gene:ENSCPOG00000011896 transcript:ENSCPOT00000012011	K205	Acetylation	100% (1,000.00)	1	0	0	0	0	6	2	0	0	6	3	0	0	0	0	0	0	1	1	0	0	0	0	0	0
ENSCPOP00000010729	pep:novel scaffold:cavPor3:scaffold_227:557790:566850:-1 gene:ENSCPOG00000011926 transcript:ENSCPOT00000012041	K132	Acetylation	100% (79.75)	1	0	0	0	0	0	0	0	0	0	0	0	0	0	0	0	0	1	0	0	0	0	0	0	0
ENSCPOP00000010729	pep:novel scaffold:cavPor3:scaffold_227:557790:566850:-1 gene:ENSCPOG00000011926 transcript:ENSCPOT00000012041	K87	Acetylation	100% (178.98)	1	0	0	0	0	2	2	0	0	3	3	0	0	0	0	0	0	0	1	0	0	0	0	0	0
ENSCPOP00000010730	pep:novel scaffold:cavPor3:scaffold_21:15123631:15146990:1 gene:ENSCPOG00000011927 transcript:ENSCPOT00000012042	K81	Acetylation	100% (1,000.00)	1	0	0	0	0	4	0	0	0	3	0	0	0	0	0	0	0	1	0	0	0	4	0	0	0
ENSCPOP00000010730	pep:novel scaffold:cavPor3:scaffold_21:15123631:15146990:1 gene:ENSCPOG00000011927 transcript:ENSCPOT00000012042	K35	Acetylation	100% (1,000.00)	1	0	0	0	0	4	4	0	0	0	6	0	4	0	0	0	0	1	0	0	0	10	5	0	0
ENSCPOP00000010730	pep:novel scaffold:cavPor3:scaffold_21:15123631:15146990:1 gene:ENSCPOG00000011927 transcript:ENSCPOT00000012042	K166	Acetylation	100% (81.97)	1	4	0	2	0	2	2	0	0	0	0	0	0	2	0	0	0	1	0	3	3	10	8	0	0
ENSCPOP00000010829	pep:novel scaffold:cavPor3:scaffold_4:40014146:40023545:-1 gene:ENSCPOG00000012038 transcript:ENSCPOT00000012154	K92	Acetylation	100% (69.39)	1	0	0	0	0	0	0	0	0	0	0	0	0	0	0	0	0	0	0	0	0	0	2	0	0
ENSCPOP00000010906	pep:novel scaffold:cavPor3:scaffold_1:34736183:34743090:1 gene:ENSCPOG00000012129 transcript:ENSCPOT00000012245	K179	Acetylation	100% (112.92)	1	2	0	0	0	0	0	0	0	0	0	0	0	0	0	0	0	0	0	0	0	0	0	0	0
ENSCPOP00000010922	pep:novel scaffold:cavPor3:scaffold_0:19470918:19475074:1 gene:ENSCPOG00000012149 transcript:ENSCPOT00000012265	K45	Acetylation	100% (1,000.00)	1	0	0	0	0	0	0	0	0	0	0	0	0	0	0	0	0	0	0	0	0	3	0	0	0
ENSCPOP00000010922	pep:novel scaffold:cavPor3:scaffold_0:19470918:19475074:1 gene:ENSCPOG00000012149 transcript:ENSCPOT00000012265	K78	Acetylation	100% (107.44)	1	2	0	6	0	0	0	0	0	0	0	0	0	4	0	0	0	0	0	1	0	5	0	0	0
ENSCPOP00000010922	pep:novel scaffold:cavPor3:scaffold_0:19470918:19475074:1 gene:ENSCPOG00000012149 transcript:ENSCPOT00000012265	K88	Acetylation	100% (179.07)	1	3	0	8	0	0	0	0	0	0	0	0	0	0	0	0	0	0	0	0	0	9	7	0	0
ENSCPOP00000010922	pep:novel scaffold:cavPor3:scaffold_0:19470918:19475074:1 gene:ENSCPOG00000012149 transcript:ENSCPOT00000012265	K96	Acetylation	100% (143.38)	1	10	0	15	0	0	0	0	0	0	0	0	0	0	0	0	0	0	0	1	0	0	8	0	0
ENSCPOP00000011060	pep:novel scaffold:cavPor3:scaffold_25:5710930:5718340:1 gene:ENSCPOG00000012297 transcript:ENSCPOT00000012413	K38	Acetylation	100% (78.40)	1	0	0	0	0	0	4	0	0	0	3	0	0	0	0	0	0	0	1	0	0	0	0	0	0
ENSCPOP00000011074	pep:novel scaffold:cavPor3:scaffold_107:589423:596421:1 gene:ENSCPOG00000012311 transcript:ENSCPOT00000012428	K156	Acetylation	100% (92.31)	1	0	0	0	0	0	0	0	0	0	0	0	0	0	0	0	0	0	0	0	0	1	1	0	0
ENSCPOP00000011074	pep:novel scaffold:cavPor3:scaffold_107:589423:596421:1 gene:ENSCPOG00000012311 transcript:ENSCPOT00000012428	K148	Acetylation	100% (187.93)	1	0	0	2	0	0	0	0	0	0	0	0	0	2	3	0	0	0	0	0	0	4	3	0	0
ENSCPOP00000011074	pep:novel scaffold:cavPor3:scaffold_107:589423:596421:1 gene:ENSCPOG00000012311 transcript:ENSCPOT00000012428	K146	Acetylation	100% (205.69)	1	0	0	2	0	0	0	0	0	0	0	0	0	2	3	0	0	0	0	0	0	4	3	0	0
ENSCPOP00000011106	pep:novel scaffold:cavPor3:scaffold_107:398689:402677:-1 gene:ENSCPOG00000012344 transcript:ENSCPOT00000012461	K193	Acetylation	100% (83.57)	1	0	0	0	0	2	0	0	0	2	0	0	0	0	0	0	0	0	0	0	0	0	0	0	0
ENSCPOP00000011106	pep:novel scaffold:cavPor3:scaffold_107:398689:402677:-1 gene:ENSCPOG00000012344 transcript:ENSCPOT00000012461	K275	Acetylation	100% (52.21)	1	0	0	0	0	4	0	0	0	0	0	0	0	0	0	0	0	1	0	0	0	0	0	0	0
ENSCPOP00000011134	pep:novel scaffold:cavPor3:scaffold_1:44847412:44865680:-1 gene:ENSCPOG00000012372 transcript:ENSCPOT00000012490	K257	Acetylation	100% (52.36)	1	0	0	1	0	0	0	0	0	0	0	0	0	0	0	0	0	0	0	0	0	0	0	0	0
ENSCPOP00000011134	pep:novel scaffold:cavPor3:scaffold_1:44847412:44865680:-1 gene:ENSCPOG00000012372 transcript:ENSCPOT00000012490	K414	Acetylation	100% (1,000.00)	1	4	0	2	0	0	0	0	0	0	0	0	0	0	0	0	0	0	0	0	0	0	3	0	0
ENSCPOP00000011134	pep:novel scaffold:cavPor3:scaffold_1:44847412:44865680:-1 gene:ENSCPOG00000012372 transcript:ENSCPOT00000012490	K147	Acetylation	100% (86.31)	1	0	0	0	0	0	0	0	0	0	1	0	12	0	0	0	0	0	0	0	4	0	0	0	0
ENSCPOP00000011134	pep:novel scaffold:cavPor3:scaffold_1:44847412:44865680:-1 gene:ENSCPOG00000012372 transcript:ENSCPOT00000012490	K266	Acetylation	100% (64.79)	1	18	0	0	0	4	2	0	4	0	3	7	7	0	0	0	0	0	1	5	5	0	8	0	0
ENSCPOP00000011134	pep:novel scaffold:cavPor3:scaffold_1:44847412:44865680:-1 gene:ENSCPOG00000012372 transcript:ENSCPOT00000012490	K272	Acetylation	100% (1,000.00)	1	10	0	7	0	0	0	0	2	0	3	6	12	8	0	0	3	0	0	0	8	0	27	0	0
ENSCPOP00000011134	pep:novel scaffold:cavPor3:scaffold_1:44847412:44865680:-1 gene:ENSCPOG00000012372 transcript:ENSCPOT00000012490	K76	Acetylation	100% (54.21)	1	25	0	9	14	0	6	0	0	0	3	0	14	24	11	0	0	0	2	1	8	1	9	0	0
ENSCPOP00000011149	pep:novel scaffold:cavPor3:scaffold_156:1298272:1299767:-1 gene:ENSCPOG00000012392 transcript:ENSCPOT00000012510	K28	Acetylation	100% (95.51)	1	1	0	0	0	0	0	0	0	0	0	2	0	0	0	0	0	0	0	0	0	0	0	0	0
ENSCPOP00000011149	pep:novel scaffold:cavPor3:scaffold_156:1298272:1299767:-1 gene:ENSCPOG00000012392 transcript:ENSCPOT00000012510	K21	Acetylation	100% (1,000.00)	1	3	0	6	0	0	0	0	0	0	0	2	2	0	0	0	0	0	0	0	0	0	0	0	0
ENSCPOP00000011321	pep:novel scaffold:cavPor3:scaffold_14:14529901:14583848:-1 gene:ENSCPOG00000012583 transcript:ENSCPOT00000012704	K156	Acetylation	100% (1,000.00)	1	0	0	3	0	0	0	0	0	0	0	0	0	0	0	0	0	0	0	0	0	0	0	0	0
ENSCPOP00000011344	pep:novel scaffold:cavPor3:scaffold_7:47475927:47479038:-1 gene:ENSCPOG00000012609 transcript:ENSCPOT00000012730	K167	Acetylation	100% (90.40)	1	0	0	1	0	0	0	0	0	0	0	0	0	0	0	0	0	0	0	0	0	5	4	0	0
ENSCPOP00000011344	pep:novel scaffold:cavPor3:scaffold_7:47475927:47479038:-1 gene:ENSCPOG00000012609 transcript:ENSCPOT00000012730	K138	Acetylation	100% (1,000.00)	1	6	0	11	0	0	0	0	0	0	1	0	4	6	0	0	0	0	0	0	2	14	7	0	0
ENSCPOP00000011358	pep:novel scaffold:cavPor3:scaffold_73:2037894:2057895:1 gene:ENSCPOG00000012626 transcript:ENSCPOT00000012747	K221	Acetylation	100% (1,000.00)	1	0	0	0	0	0	2	0	0	3	3	0	0	0	0	0	0	0	1	0	0	0	0	0	0
ENSCPOP00000011373	pep:novel scaffold:cavPor3:scaffold_28:25045513:25081094:1 gene:ENSCPOG00000012642 transcript:ENSCPOT00000012763	K138	Acetylation	100% (1,000.00)	1	0	0	0	0	0	0	0	0	0	0	0	0	0	0	0	0	0	1	0	0	0	0	0	0
ENSCPOP00000011373	pep:novel scaffold:cavPor3:scaffold_28:25045513:25081094:1 gene:ENSCPOG00000012642 transcript:ENSCPOT00000012763	K605	Acetylation	100% (1,000.00)	1	0	0	0	0	0	0	0	0	0	0	0	0	0	0	0	0	0	0	1	0	2	0	0	0
ENSCPOP00000011373	pep:novel scaffold:cavPor3:scaffold_28:25045513:25081094:1 gene:ENSCPOG00000012642 transcript:ENSCPOT00000012763	K305	Acetylation	100% (95.51)	1	2	0	0	0	0	0	0	0	0	0	0	3	0	0	0	0	0	0	0	1	0	0	0	0
ENSCPOP00000011373	pep:novel scaffold:cavPor3:scaffold_28:25045513:25081094:1 gene:ENSCPOG00000012642 transcript:ENSCPOT00000012763	K304	Acetylation	100% (119.38)	1	2	0	0	0	0	0	0	0	0	0	0	3	0	0	0	0	0	0	0	1	0	0	0	0
ENSCPOP00000011373	pep:novel scaffold:cavPor3:scaffold_28:25045513:25081094:1 gene:ENSCPOG00000012642 transcript:ENSCPOT00000012763	K309	Acetylation	100% (1,000.00)	1	4	0	0	0	0	0	0	0	2	0	0	0	0	0	0	0	1	0	3	0	0	0	0	0
ENSCPOP00000011373	pep:novel scaffold:cavPor3:scaffold_28:25045513:25081094:1 gene:ENSCPOG00000012642 transcript:ENSCPOT00000012763	K523	Acetylation	100% (1,000.00)	1	0	0	3	0	0	2	0	0	0	6	0	0	0	4	0	0	0	1	0	0	2	2	0	0
ENSCPOP00000011373	pep:novel scaffold:cavPor3:scaffold_28:25045513:25081094:1 gene:ENSCPOG00000012642 transcript:ENSCPOT00000012763	K228	Acetylation	100% (109.69)	1	10	0	0	0	0	0	3	0	2	0	0	0	0	0	0	0	1	0	4	4	0	0	0	0
ENSCPOP00000011373	pep:novel scaffold:cavPor3:scaffold_28:25045513:25081094:1 gene:ENSCPOG00000012642 transcript:ENSCPOT00000012763	K723	Acetylation	100% (1,000.00)	1	30	5	0	0	6	2	0	0	3	0	0	0	0	0	0	0	1	0	4	4	0	0	0	0
ENSCPOP00000011373	pep:novel scaffold:cavPor3:scaffold_28:25045513:25081094:1 gene:ENSCPOG00000012642 transcript:ENSCPOT00000012763	K50	Acetylation	100% (1,000.00)	1	42	0	27	0	10	0	15	0	6	3	16	8	0	0	0	0	1	2	12	12	11	21	4	4
ENSCPOP00000011443	pep:novel scaffold:cavPor3:scaffold_14:19065414:19075174:1 gene:ENSCPOG00000012719 transcript:ENSCPOT00000012841	K158	Acetylation	100% (60.40)	1	0	0	0	0	0	0	0	0	0	0	0	1	0	0	0	0	0	0	0	0	0	0	0	0
ENSCPOP00000011443	pep:novel scaffold:cavPor3:scaffold_14:19065414:19075174:1 gene:ENSCPOG00000012719 transcript:ENSCPOT00000012841	K424	Acetylation	100% (124.20)	1	0	0	0	0	0	0	0	0	0	0	0	0	0	0	0	0	0	0	2	0	2	0	0	0
ENSCPOP00000011443	pep:novel scaffold:cavPor3:scaffold_14:19065414:19075174:1 gene:ENSCPOG00000012719 transcript:ENSCPOT00000012841	K120	Acetylation	100% (48.99)	1	3	0	0	0	0	0	0	0	0	0	0	0	0	0	0	0	0	0	0	0	0	1	0	0
ENSCPOP00000011443	pep:novel scaffold:cavPor3:scaffold_14:19065414:19075174:1 gene:ENSCPOG00000012719 transcript:ENSCPOT00000012841	K503	Acetylation	100% (1,000.00)	1	6	0	0	0	0	0	0	0	0	0	0	3	0	0	0	0	0	0	1	1	8	4	0	0
ENSCPOP00000011443	pep:novel scaffold:cavPor3:scaffold_14:19065414:19075174:1 gene:ENSCPOG00000012719 transcript:ENSCPOT00000012841	K258	Acetylation	100% (1,000.00)	1	16	0	24	6	0	0	2	2	0	0	5	5	0	0	0	0	0	0	0	3	0	0	0	1
ENSCPOP00000011443	pep:novel scaffold:cavPor3:scaffold_14:19065414:19075174:1 gene:ENSCPOG00000012719 transcript:ENSCPOT00000012841	K495	Acetylation	100% (124.66)	1	0	4	20	15	0	0	1	1	0	0	0	0	0	6	0	2	0	0	3	0	0	14	0	0
ENSCPOP00000011443	pep:novel scaffold:cavPor3:scaffold_14:19065414:19075174:1 gene:ENSCPOG00000012719 transcript:ENSCPOT00000012841	K528	Acetylation	100% (224.79)	1	24	8	24	6	0	0	10	4	0	0	6	5	0	0	0	0	0	0	9	9	7	7	0	1
ENSCPOP00000011443	pep:novel scaffold:cavPor3:scaffold_14:19065414:19075174:1 gene:ENSCPOG00000012719 transcript:ENSCPOT00000012841	K536	Acetylation	100% (53.88)	1	64	16	54	16	2	0	15	9	0	3	23	32	11	11	0	12	0	1	23	30	19	19	4	9
ENSCPOP00000011563	pep:novel scaffold:cavPor3:scaffold_14:32249592:32254930:-1 gene:ENSCPOG00000012845 transcript:ENSCPOT00000012970	K14	Acetylation	100% (1,000.00)	1	0	0	0	0	2	0	0	0	0	0	0	0	0	0	0	0	0	0	0	0	0	0	0	0
ENSCPOP00000011583	pep:novel scaffold:cavPor3:scaffold_0:28786102:28794798:1 gene:ENSCPOG00000012870 transcript:ENSCPOT00000012995	K155	Acetylation	100% (43.47)	1	0	0	0	0	0	0	0	0	1	0	0	0	0	0	0	0	0	0	0	0	0	0	0	0
ENSCPOP00000011640	pep:known scaffold:cavPor3:scaffold_19:35866009:35869151:1 gene:ENSCPOG00000012928 transcript:ENSCPOT00000013053	K174	Acetylation	100% (70.53)	1	0	0	0	0	0	2	0	0	0	0	0	0	0	0	0	0	0	1	0	0	0	0	0	0
ENSCPOP00000011640	pep:known scaffold:cavPor3:scaffold_19:35866009:35869151:1 gene:ENSCPOG00000012928 transcript:ENSCPOT00000013053	K175	Acetylation	100% (78.54)	1	0	0	0	0	0	2	0	0	0	0	0	0	0	0	0	0	0	1	0	0	0	0	0	0
ENSCPOP00000011651	pep:novel scaffold:cavPor3:scaffold_13:2504462:2538385:-1 gene:ENSCPOG00000012942 transcript:ENSCPOT00000013067	K189	Acetylation	100% (97.70)	1	0	0	0	0	0	0	0	0	0	0	0	2	0	0	0	0	0	0	0	1	0	0	0	0
ENSCPOP00000011651	pep:novel scaffold:cavPor3:scaffold_13:2504462:2538385:-1 gene:ENSCPOG00000012942 transcript:ENSCPOT00000013067	K479	Acetylation	100% (119.38)	1	0	0	0	0	0	0	0	0	0	0	2	0	0	0	0	0	0	0	1	0	3	0	0	0
ENSCPOP00000011651	pep:novel scaffold:cavPor3:scaffold_13:2504462:2538385:-1 gene:ENSCPOG00000012942 transcript:ENSCPOT00000013067	K233	Acetylation	100% (1,000.00)	1	6	0	0	0	0	0	0	0	0	0	0	3	0	0	0	0	0	0	0	1	0	0	0	0
ENSCPOP00000011651	pep:novel scaffold:cavPor3:scaffold_13:2504462:2538385:-1 gene:ENSCPOG00000012942 transcript:ENSCPOT00000013067	K241	Acetylation	100% (1,000.00)	1	24	0	24	0	4	0	16	0	3	0	14	0	9	0	0	0	1	0	5	0	0	0	0	0
ENSCPOP00000011651	pep:novel scaffold:cavPor3:scaffold_13:2504462:2538385:-1 gene:ENSCPOG00000012942 transcript:ENSCPOT00000013067	K983	Acetylation	100% (1,000.00)	1	55	0	49	0	0	0	3	0	6	2	24	18	16	0	0	0	1	0	8	8	9	0	0	0
ENSCPOP00000011654	pep:novel scaffold:cavPor3:scaffold_232:23528:45611:1 gene:ENSCPOG00000012945 transcript:ENSCPOT00000013070	K325	Acetylation	100% (1,000.00)	1	3	0	5	0	0	0	0	0	0	0	0	4	0	0	0	0	1	1	0	2	6	0	0	0
ENSCPOP00000011654	pep:novel scaffold:cavPor3:scaffold_232:23528:45611:1 gene:ENSCPOG00000012945 transcript:ENSCPOT00000013070	K384	Acetylation	100% (1,000.00)	1	12	0	15	5	0	0	0	0	0	0	0	4	6	0	0	0	1	2	2	2	14	0	0	0
ENSCPOP00000011673	pep:novel scaffold:cavPor3:scaffold_29:14939013:15052270:1 gene:ENSCPOG00000012966 transcript:ENSCPOT00000013091	K473	Acetylation	100% (155.20)	1	14	0	0	0	2	2	0	0	0	0	5	5	0	0	0	0	1	1	4	0	1	0	0	0
ENSCPOP00000011673	pep:novel scaffold:cavPor3:scaffold_29:14939013:15052270:1 gene:ENSCPOG00000012966 transcript:ENSCPOT00000013091	K455	Acetylation	100% (133.32)	1	6	2	8	0	0	0	0	0	0	0	3	3	0	5	0	0	1	0	3	1	0	6	0	0
ENSCPOP00000011673	pep:novel scaffold:cavPor3:scaffold_29:14939013:15052270:1 gene:ENSCPOG00000012966 transcript:ENSCPOT00000013091	K296	Acetylation	100% (1,000.00)	1	24	0	24	0	4	0	4	0	3	0	7	0	9	0	0	0	0	1	5	5	10	0	0	0
ENSCPOP00000011673	pep:novel scaffold:cavPor3:scaffold_29:14939013:15052270:1 gene:ENSCPOG00000012966 transcript:ENSCPOT00000013091	K421	Acetylation	100% (250.36)	1	84	14	0	9	0	2	0	5	0	9	0	16	30	10	0	0	1	5	8	18	3	25	0	8
ENSCPOP00000011674	pep:novel scaffold:cavPor3:scaffold_80:3647536:3647862:-1 gene:ENSCPOG00000012967 transcript:ENSCPOT00000013092	K55	Acetylation	100% (99.95)	1	1	0	0	0	0	0	0	0	0	0	0	2	0	0	0	0	0	0	1	0	1	0	0	0
ENSCPOP00000011674	pep:novel scaffold:cavPor3:scaffold_80:3647536:3647862:-1 gene:ENSCPOG00000012967 transcript:ENSCPOT00000013092	K68	Acetylation	100% (1,000.00)	1	0	0	1	0	0	0	0	0	0	0	0	0	0	0	0	0	0	0	0	0	3	2	0	0
ENSCPOP00000011748	pep:known scaffold:cavPor3:scaffold_9:5779044:5807660:1 gene:ENSCPOG00000013048 transcript:ENSCPOT00000013175	K73	Acetylation	100% (110.21)	1	0	0	0	0	6	2	0	0	3	0	0	0	0	0	0	0	1	1	0	0	0	0	0	0
ENSCPOP00000011810	pep:novel scaffold:cavPor3:scaffold_6:17231705:17263534:1 gene:ENSCPOG00000013120 transcript:ENSCPOT00000013247	K411	Acetylation	100% (244.49)	1	0	0	0	0	1	0	0	0	0	0	0	0	0	0	0	0	0	0	2	0	3	0	0	0
ENSCPOP00000011810	pep:novel scaffold:cavPor3:scaffold_6:17231705:17263534:1 gene:ENSCPOG00000013120 transcript:ENSCPOT00000013247	K434	Acetylation	100% (1,000.00)	1	3	0	6	0	0	0	0	0	0	0	2	0	0	0	0	0	0	0	0	0	0	0	0	0
ENSCPOP00000011810	pep:novel scaffold:cavPor3:scaffold_6:17231705:17263534:1 gene:ENSCPOG00000013120 transcript:ENSCPOT00000013247	K352	Acetylation	100% (91.97)	1	3	4	6	12	12	0	0	0	0	0	5	0	0	0	0	0	1	0	3	0	0	7	0	0
ENSCPOP00000011828	pep:novel scaffold:cavPor3:scaffold_61:10028635:10033077:1 gene:ENSCPOG00000013139 transcript:ENSCPOT00000013266	K275	Acetylation	100% (81.56)	1	0	0	0	0	2	0	0	0	0	0	0	0	0	0	0	0	1	0	0	0	0	0	0	0
ENSCPOP00000011862	pep:novel scaffold:cavPor3:scaffold_101:566385:595998:1 gene:ENSCPOG00000013176 transcript:ENSCPOT00000013303	K258	Acetylation	100% (53.07)	1	0	0	0	0	0	0	0	0	0	0	0	1	0	0	0	0	0	0	0	0	0	0	0	0
ENSCPOP00000011904	pep:novel scaffold:cavPor3:scaffold_14:7948343:7978673:1 gene:ENSCPOG00000013224 transcript:ENSCPOT00000013351	K291	Acetylation	100% (1,000.00)	1	0	0	0	0	0	0	0	0	0	0	0	4	0	0	0	0	0	0	0	1	0	0	0	0
ENSCPOP00000011918	pep:novel scaffold:cavPor3:scaffold_95:3236041:3237466:1 gene:ENSCPOG00000013237 transcript:ENSCPOT00000013365	K283	Acetylation	100% (1,000.00)	1	0	0	0	0	0	0	0	0	0	0	0	3	0	0	0	0	0	0	0	1	0	0	0	0
ENSCPOP00000011954	pep:novel scaffold:cavPor3:scaffold_53:7298438:7312532:-1 gene:ENSCPOG00000013278 transcript:ENSCPOT00000013407	K32	Acetylation	100% (1,000.00)	1	1	0	0	0	0	0	0	0	0	0	0	0	0	0	0	0	0	0	0	0	0	0	0	0
ENSCPOP00000011954	pep:novel scaffold:cavPor3:scaffold_53:7298438:7312532:-1 gene:ENSCPOG00000013278 transcript:ENSCPOT00000013407	K151	Acetylation	100% (95.83)	1	0	0	2	0	0	0	0	0	0	0	0	0	0	0	0	0	0	0	0	0	0	0	0	0
ENSCPOP00000011954	pep:novel scaffold:cavPor3:scaffold_53:7298438:7312532:-1 gene:ENSCPOG00000013278 transcript:ENSCPOT00000013407	K142	Acetylation	100% (122.49)	1	25	0	12	0	6	4	0	0	3	0	0	0	0	0	0	0	2	1	4	0	0	0	0	0
ENSCPOP00000011954	pep:novel scaffold:cavPor3:scaffold_53:7298438:7312532:-1 gene:ENSCPOG00000013278 transcript:ENSCPOT00000013407	K139	Acetylation	100% (43.47)	1	12	0	12	6	6	0	0	0	0	0	0	5	7	7	0	0	1	1	0	3	0	8	0	0
ENSCPOP00000011954	pep:novel scaffold:cavPor3:scaffold_53:7298438:7312532:-1 gene:ENSCPOG00000013278 transcript:ENSCPOT00000013407	K459	Acetylation	100% (107.44)	1	25	0	7	0	1	2	0	0	0	3	0	6	0	8	0	0	0	1	2	4	15	9	0	0
ENSCPOP00000012084	pep:novel scaffold:cavPor3:scaffold_16:19620624:19831690:-1 gene:ENSCPOG00000013421 transcript:ENSCPOT00000013553	K319	Acetylation	100% (126.47)	1	3	0	0	0	0	0	0	0	0	0	4	0	0	0	0	0	1	0	2	4	0	0	0	0
ENSCPOP00000012084	pep:novel scaffold:cavPor3:scaffold_16:19620624:19831690:-1 gene:ENSCPOG00000013421 transcript:ENSCPOT00000013553	K243	Acetylation	100% (67.54)	1	35	0	8	0	2	2	0	0	0	9	6	12	24	14	0	0	3	2	3	12	23	8	0	0
ENSCPOP00000012216	pep:novel scaffold:cavPor3:scaffold_145:455930:492653:1 gene:ENSCPOG00000013569 transcript:ENSCPOT00000013704	K245	Acetylation	100% (145.94)	1	0	0	0	0	0	0	0	0	0	0	0	2	0	0	0	0	0	0	0	0	0	0	0	0
ENSCPOP00000012232	pep:known scaffold:cavPor3:scaffold_13:41687356:41701856:-1 gene:ENSCPOG00000013587 transcript:ENSCPOT00000013722	K81	Acetylation	100% (1,000.00)	1	0	0	0	0	4	2	0	0	3	3	0	0	0	0	0	0	1	1	0	0	0	0	0	0
ENSCPOP00000012344	pep:novel scaffold:cavPor3:scaffold_27:13320622:13333685:-1 gene:ENSCPOG00000013707 transcript:ENSCPOT00000013846	K9	Acetylation	100% (1,000.00)	1	0	0	0	0	0	0	0	0	0	0	0	0	1	0	0	0	0	0	0	0	0	0	0	0
ENSCPOP00000012587	pep:novel scaffold:cavPor3:scaffold_16:5484889:5557403:1 gene:ENSCPOG00000013969 transcript:ENSCPOT00000014110	K96	Acetylation	100% (90.16)	1	0	0	0	0	0	0	0	0	0	0	0	0	0	1	0	0	0	0	0	0	0	0	0	0
ENSCPOP00000012587	pep:novel scaffold:cavPor3:scaffold_16:5484889:5557403:1 gene:ENSCPOG00000013969 transcript:ENSCPOT00000014110	K584	Acetylation	100% (1,000.00)	1	0	0	0	0	0	0	0	0	0	0	0	0	0	0	0	0	0	0	0	0	0	1	0	0
ENSCPOP00000012673	pep:novel scaffold:cavPor3:scaffold_2:35863251:35875058:1 gene:ENSCPOG00000014070 transcript:ENSCPOT00000014212	K238	Acetylation	100% (79.75)	1	0	0	0	0	0	0	0	0	0	0	2	0	0	0	0	0	0	0	1	0	0	0	0	0
ENSCPOP00000012673	pep:novel scaffold:cavPor3:scaffold_2:35863251:35875058:1 gene:ENSCPOG00000014070 transcript:ENSCPOT00000014212	K144	Acetylation	100% (139.11)	1	0	0	2	0	0	0	0	0	0	0	0	0	0	0	0	0	0	0	0	0	2	0	0	0
ENSCPOP00000012673	pep:novel scaffold:cavPor3:scaffold_2:35863251:35875058:1 gene:ENSCPOG00000014070 transcript:ENSCPOT00000014212	K191	Acetylation	100% (79.13)	1	5	0	6	0	0	0	0	0	0	0	0	0	0	0	0	0	0	0	0	0	0	0	0	0
ENSCPOP00000012673	pep:novel scaffold:cavPor3:scaffold_2:35863251:35875058:1 gene:ENSCPOG00000014070 transcript:ENSCPOT00000014212	K244	Acetylation	100% (83.47)	1	4	0	12	4	0	0	0	0	0	0	3	3	5	5	0	0	0	0	1	0	6	6	0	0
ENSCPOP00000012673	pep:novel scaffold:cavPor3:scaffold_2:35863251:35875058:1 gene:ENSCPOG00000014070 transcript:ENSCPOT00000014212	K162	Acetylation	100% (1,000.00)	1	20	4	18	12	0	0	6	2	0	0	10	0	7	7	0	0	0	0	6	3	8	8	0	1
ENSCPOP00000012673	pep:novel scaffold:cavPor3:scaffold_2:35863251:35875058:1 gene:ENSCPOG00000014070 transcript:ENSCPOT00000014212	K233	Acetylation	100% (105.50)	1	26	0	49	14	0	0	0	0	0	0	3	6	19	15	0	0	0	0	3	3	6	17	0	0
ENSCPOP00000012673	pep:novel scaffold:cavPor3:scaffold_2:35863251:35875058:1 gene:ENSCPOG00000014070 transcript:ENSCPOT00000014212	K154	Acetylation	100% (167.13)	1	22	0	48	6	0	0	0	0	0	0	9	6	14	8	0	0	0	0	5	3	22	24	0	0
ENSCPOP00000012765	pep:novel scaffold:cavPor3:scaffold_35:15209255:15212535:-1 gene:ENSCPOG00000014169 transcript:ENSCPOT00000014311	K37	Acetylation	100% (202.26)	1	0	0	0	0	8	0	0	0	3	3	0	0	0	0	0	0	1	3	0	0	0	0	0	0
ENSCPOP00000012765	pep:novel scaffold:cavPor3:scaffold_35:15209255:15212535:-1 gene:ENSCPOG00000014169 transcript:ENSCPOT00000014311	K34	Acetylation	100% (42.08)	1	0	0	0	0	4	0	0	0	9	6	0	0	0	0	0	0	3	2	0	0	0	0	0	0
ENSCPOP00000012797	pep:novel scaffold:cavPor3:scaffold_2:33881865:33886629:1 gene:ENSCPOG00000014205 transcript:ENSCPOT00000014347	K94	Acetylation	100% (97.47)	1	0	0	0	0	0	0	0	0	0	2	0	0	0	0	0	0	0	1	0	0	0	0	0	0
ENSCPOP00000012815	pep:known scaffold:cavPor3:scaffold_52:1829283:1835223:-1 gene:ENSCPOG00000014223 transcript:ENSCPOT00000014365	K132	Acetylation	100% (90.56)	1	0	0	0	0	2	8	0	0	0	9	0	0	0	0	0	0	1	0	0	0	0	0	0	0
ENSCPOP00000013152	pep:novel scaffold:cavPor3:scaffold_21:24549965:24560266:1 gene:ENSCPOG00000014597 transcript:ENSCPOT00000014742	K312	Acetylation	100% (161.63)	1	0	0	0	0	28	2	0	0	6	6	0	0	0	0	0	0	2	2	0	0	0	0	0	0
ENSCPOP00000013353	pep:novel scaffold:cavPor3:scaffold_3:17880593:17968263:1 gene:ENSCPOG00000014818 transcript:ENSCPOT00000014963	K575	Acetylation	100% (1,000.00)	1	0	0	0	0	0	0	0	0	0	0	2	0	0	0	0	0	0	0	2	0	0	0	0	0
ENSCPOP00000013435	pep:known scaffold:cavPor3:scaffold_9:41905023:41916201:1 gene:ENSCPOG00000014910 transcript:ENSCPOT00000015055	K382	Acetylation	100% (129.42)	1	0	0	0	0	0	0	0	0	0	0	0	0	0	0	0	0	0	0	0	0	1	1	0	0
ENSCPOP00000013435	pep:known scaffold:cavPor3:scaffold_9:41905023:41916201:1 gene:ENSCPOG00000014910 transcript:ENSCPOT00000015055	K375	Acetylation	100% (143.02)	1	2	0	0	0	2	0	0	0	0	0	0	0	0	0	0	0	1	0	1	0	3	3	0	0
ENSCPOP00000013435	pep:known scaffold:cavPor3:scaffold_9:41905023:41916201:1 gene:ENSCPOG00000014910 transcript:ENSCPOT00000015055	K103	Acetylation	100% (1,000.00)	1	0	0	5	0	0	0	0	0	0	2	0	4	6	6	0	0	1	0	3	4	7	21	0	0
ENSCPOP00000013435	pep:known scaffold:cavPor3:scaffold_9:41905023:41916201:1 gene:ENSCPOG00000014910 transcript:ENSCPOT00000015055	K321	Acetylation	100% (76.27)	1	43	0	46	19	6	3	8	7	7	5	8	8	10	10	0	5	2	2	12	12	28	11	0	0
ENSCPOP00000013435	pep:known scaffold:cavPor3:scaffold_9:41905023:41916201:1 gene:ENSCPOG00000014910 transcript:ENSCPOT00000015055	K327	Acetylation	100% (1,000.00)	1	62	17	55	23	18	4	0	4	6	3	13	26	0	0	0	0	1	2	14	18	27	9	0	0
ENSCPOP00000013476	pep:novel scaffold:cavPor3:scaffold_18:26769680:26778031:-1 gene:ENSCPOG00000014953 transcript:ENSCPOT00000015099	K27	Acetylation	100% (66.32)	1	1	0	0	0	0	0	0	0	0	0	0	0	0	0	0	0	0	0	0	0	0	0	0	0
ENSCPOP00000013476	pep:novel scaffold:cavPor3:scaffold_18:26769680:26778031:-1 gene:ENSCPOG00000014953 transcript:ENSCPOT00000015099	K51	Acetylation	100% (67.87)	1	0	0	0	0	0	0	0	0	0	0	0	1	0	0	0	0	0	0	0	0	0	0	0	0
ENSCPOP00000013476	pep:novel scaffold:cavPor3:scaffold_18:26769680:26778031:-1 gene:ENSCPOG00000014953 transcript:ENSCPOT00000015099	K69	Acetylation	100% (117.81)	1	2	0	4	0	0	0	0	0	0	0	0	6	0	0	0	0	0	0	0	1	0	0	0	0
ENSCPOP00000013483	pep:novel scaffold:cavPor3:scaffold_6:57908024:57954535:-1 gene:ENSCPOG00000014961 transcript:ENSCPOT00000015107	K408	Acetylation	100% (93.14)	1	45	0	23	0	0	2	0	0	0	6	0	24	0	16	0	0	2	0	5	12	21	48	0	0
ENSCPOP00000013564	pep:novel scaffold:cavPor3:scaffold_136:798095:818006:1 gene:ENSCPOG00000015048 transcript:ENSCPOT00000015195	K83	Acetylation	100% (51.96)	1	0	0	0	0	0	0	0	0	0	0	0	1	0	0	0	0	0	0	0	0	1	0	0	0
ENSCPOP00000013564	pep:novel scaffold:cavPor3:scaffold_136:798095:818006:1 gene:ENSCPOG00000015048 transcript:ENSCPOT00000015195	K307	Acetylation	100% (1,000.00)	1	0	0	0	0	0	0	0	0	0	0	0	1	0	2	0	0	0	0	0	0	0	0	0	0
ENSCPOP00000013564	pep:novel scaffold:cavPor3:scaffold_136:798095:818006:1 gene:ENSCPOG00000015048 transcript:ENSCPOT00000015195	K202	Acetylation	100% (1,000.00)	1	2	0	4	0	0	0	0	0	0	0	0	3	0	0	0	0	0	0	1	1	1	0	0	0
ENSCPOP00000013564	pep:novel scaffold:cavPor3:scaffold_136:798095:818006:1 gene:ENSCPOG00000015048 transcript:ENSCPOT00000015195	K174	Acetylation	100% (152.81)	1	10	4	11	3	0	0	0	0	0	0	0	0	0	0	0	0	0	0	0	0	0	6	0	1
ENSCPOP00000013805	pep:novel scaffold:cavPor3:scaffold_8:21940631:21944769:1 gene:ENSCPOG00000015319 transcript:ENSCPOT00000015468	K126	Acetylation	100% (66.99)	1	0	0	0	0	0	0	0	0	0	0	0	0	0	0	0	0	1	0	0	0	0	0	0	0
ENSCPOP00000013805	pep:novel scaffold:cavPor3:scaffold_8:21940631:21944769:1 gene:ENSCPOG00000015319 transcript:ENSCPOT00000015468	K87	Acetylation	100% (108.94)	1	0	0	3	0	0	0	0	0	1	1	0	0	0	0	0	0	0	0	0	2	0	0	0	0
ENSCPOP00000013842	pep:known scaffold:cavPor3:scaffold_114:766370:770831:1 gene:ENSCPOG00000015357 transcript:ENSCPOT00000015506	K179	Acetylation	100% (86.22)	1	0	0	0	0	2	2	0	0	6	3	0	0	0	0	0	0	0	1	0	0	0	0	0	0
ENSCPOP00000013842	pep:known scaffold:cavPor3:scaffold_114:766370:770831:1 gene:ENSCPOG00000015357 transcript:ENSCPOT00000015506	K171	Acetylation	100% (101.02)	1	0	0	0	0	6	2	0	0	3	3	0	0	0	0	0	0	1	1	0	0	0	0	0	0
ENSCPOP00000013842	pep:known scaffold:cavPor3:scaffold_114:766370:770831:1 gene:ENSCPOG00000015357 transcript:ENSCPOT00000015506	K290	Acetylation	100% (1,000.00)	1	0	0	0	0	11	0	0	0	3	6	0	0	0	0	0	0	1	0	0	0	0	0	0	0
ENSCPOP00000013843	pep:known scaffold:cavPor3:scaffold_114:814331:819125:1 gene:ENSCPOG00000015330 transcript:ENSCPOT00000015507	K172	Acetylation	100% (86.22)	1	0	0	0	0	2	2	0	0	0	3	0	0	0	0	0	0	0	1	0	0	0	0	0	0
ENSCPOP00000013843	pep:known scaffold:cavPor3:scaffold_114:814331:819125:1 gene:ENSCPOG00000015330 transcript:ENSCPOT00000015507	K283	Acetylation	100% (1,000.00)	1	0	0	0	0	4	2	0	0	0	3	0	0	0	0	0	0	0	1	0	0	0	0	0	0
ENSCPOP00000013843	pep:known scaffold:cavPor3:scaffold_114:814331:819125:1 gene:ENSCPOG00000015330 transcript:ENSCPOT00000015507	K164	Acetylation	100% (101.02)	1	0	0	0	0	6	2	0	0	0	3	0	0	0	0	0	0	0	1	0	0	0	0	0	0
ENSCPOP00000013906	pep:novel scaffold:cavPor3:scaffold_4:5796066:5808668:1 gene:ENSCPOG00000015423 transcript:ENSCPOT00000015574	K264	Acetylation	100% (1,000.00)	1	2	0	0	0	0	0	0	0	0	0	0	0	0	0	0	0	0	0	0	0	0	0	0	0
ENSCPOP00000013906	pep:novel scaffold:cavPor3:scaffold_4:5796066:5808668:1 gene:ENSCPOG00000015423 transcript:ENSCPOT00000015574	K308	Acetylation	100% (118.73)	1	3	0	14	4	0	0	0	0	0	0	0	0	4	0	0	0	0	0	0	0	0	8	0	0
ENSCPOP00000013961	pep:novel scaffold:cavPor3:scaffold_25:16197281:16256636:1 gene:ENSCPOG00000015480 transcript:ENSCPOT00000015632	K419	Acetylation	100% (77.12)	1	1	0	0	0	0	0	0	0	0	0	0	0	0	0	0	0	0	0	0	0	0	0	0	0
ENSCPOP00000013961	pep:novel scaffold:cavPor3:scaffold_25:16197281:16256636:1 gene:ENSCPOG00000015480 transcript:ENSCPOT00000015632	K413	Acetylation	100% (120.79)	1	1	0	2	0	0	0	0	0	0	0	0	0	0	0	0	0	0	0	0	0	0	0	0	0
ENSCPOP00000014052	pep:novel scaffold:cavPor3:scaffold_7:53120083:53508839:1 gene:ENSCPOG00000015584 transcript:ENSCPOT00000015736	K163	Acetylation	100% (1,000.00)	1	0	0	0	0	0	0	0	0	0	0	0	0	0	0	0	0	0	2	0	0	0	0	0	0
ENSCPOP00000014155	pep:novel scaffold:cavPor3:scaffold_304:242571:247378:1 gene:ENSCPOG00000015697 transcript:ENSCPOT00000015852	K271	Acetylation	100% (52.92)	1	0	0	0	0	0	0	0	0	0	0	0	0	0	0	0	0	1	0	0	0	0	0	0	0
ENSCPOP00000014295	pep:novel scaffold:cavPor3:scaffold_104:3176646:3177823:-1 gene:ENSCPOG00000027474 transcript:ENSCPOT00000025701	K70	Acetylation	100% (97.88)	1	0	0	1	0	0	0	0	0	0	0	0	0	0	0	0	0	0	0	0	0	0	0	0	0
ENSCPOP00000014295	pep:novel scaffold:cavPor3:scaffold_104:3176646:3177823:-1 gene:ENSCPOG00000027474 transcript:ENSCPOT00000025701	K86	Acetylation	100% (1,000.00)	1	1	0	0	0	0	0	0	0	0	0	0	0	0	0	0	0	0	0	0	0	2	2	0	0
ENSCPOP00000014295	pep:novel scaffold:cavPor3:scaffold_104:3176646:3177823:-1 gene:ENSCPOG00000027474 transcript:ENSCPOT00000025701	K99	Acetylation	100% (1,000.00)	1	1	0	4	0	0	0	0	0	0	0	0	0	0	0	0	0	0	0	0	0	3	0	0	0
ENSCPOP00000014325	pep:novel scaffold:cavPor3:scaffold_18:38445082:38452255:-1 gene:ENSCPOG00000022241 transcript:ENSCPOT00000024440	K222	Acetylation	100% (1,000.00)	1	0	0	0	0	0	0	0	0	0	0	0	0	0	0	0	0	0	0	0	0	0	0	0	2
ENSCPOP00000014751	pep:novel scaffold:cavPor3:scaffold_3:11929130:11992796:1 gene:ENSCPOG00000003907 transcript:ENSCPOT00000022569	K5326	Acetylation	100% (1,000.00)	1	0	0	0	0	0	0	0	0	0	0	0	0	0	1	0	0	0	0	0	0	0	0	0	0
ENSCPOP00000014751	pep:novel scaffold:cavPor3:scaffold_3:11929130:11992796:1 gene:ENSCPOG00000003907 transcript:ENSCPOT00000022569	K2720	Acetylation	100% (1,000.00)	1	0	0	0	0	0	0	0	0	0	0	0	0	0	0	0	0	0	0	0	0	1	0	0	0
ENSCPOP00000014751	pep:novel scaffold:cavPor3:scaffold_3:11929130:11992796:1 gene:ENSCPOG00000003907 transcript:ENSCPOT00000022569	K4983	Acetylation	100% (1,000.00)	1	0	0	0	0	0	0	0	0	0	0	0	0	0	0	0	0	0	0	0	0	0	1	0	0
ENSCPOP00000014751	pep:novel scaffold:cavPor3:scaffold_3:11929130:11992796:1 gene:ENSCPOG00000003907 transcript:ENSCPOT00000022569	K4532	Acetylation	100% (83.32)	1	0	0	1	0	0	0	0	0	0	0	0	0	2	0	0	0	0	0	0	0	0	0	0	0
ENSCPOP00000014862	pep:novel scaffold:cavPor3:scaffold_61:9395190:9400078:-1 gene:ENSCPOG00000020114 transcript:ENSCPOT00000020475	K634	Acetylation	100% (38.26)	1	1	0	0	0	0	0	0	0	0	0	0	0	0	0	0	0	0	0	0	0	0	0	0	0
ENSCPOP00000014862	pep:novel scaffold:cavPor3:scaffold_61:9395190:9400078:-1 gene:ENSCPOG00000020114 transcript:ENSCPOT00000020475	K277	Acetylation	100% (1,000.00)	1	3	0	0	0	0	0	2	1	0	0	4	4	2	0	0	0	0	0	4	4	2	2	0	0
ENSCPOP00000014862	pep:novel scaffold:cavPor3:scaffold_61:9395190:9400078:-1 gene:ENSCPOG00000020114 transcript:ENSCPOT00000020475	K638	Acetylation	100% (1,000.00)	1	24	0	8	0	6	2	12	4	3	0	7	0	0	0	0	0	1	0	5	5	0	0	0	0
ENSCPOP00000014862	pep:novel scaffold:cavPor3:scaffold_61:9395190:9400078:-1 gene:ENSCPOG00000020114 transcript:ENSCPOT00000020475	K238	Acetylation	100% (173.06)	1	48	6	48	8	10	0	20	0	3	6	7	28	18	9	0	0	2	2	5	10	10	20	0	0
ENSCPOP00000014862	pep:novel scaffold:cavPor3:scaffold_61:9395190:9400078:-1 gene:ENSCPOG00000020114 transcript:ENSCPOT00000020475	K120	Acetylation	100% (1,000.00)	1	56	14	36	27	0	2	8	16	3	6	24	0	30	20	0	10	2	2	6	18	22	12	0	0
ENSCPOP00000015130	pep:novel scaffold:cavPor3:scaffold_108:1665430:1665810:1 gene:ENSCPOG00000022212 transcript:ENSCPOT00000022288	K109	Acetylation	100% (133.50)	1	0	0	1	1	0	0	0	0	0	0	0	0	0	2	0	0	0	0	0	0	0	6	0	0
ENSCPOP00000015130	pep:novel scaffold:cavPor3:scaffold_108:1665430:1665810:1 gene:ENSCPOG00000022212 transcript:ENSCPOT00000022288	K6	Acetylation	100% (162.73)	1	0	0	9	1	0	0	0	0	0	0	0	0	1	6	0	0	0	0	0	0	20	11	0	0
ENSCPOP00000015130	pep:novel scaffold:cavPor3:scaffold_108:1665430:1665810:1 gene:ENSCPOG00000022212 transcript:ENSCPOT00000022288	K12	Acetylation	100% (178.98)	1	8	0	32	13	0	0	0	0	0	0	0	8	11	15	0	0	0	0	0	1	30	30	0	0
ENSCPOP00000015130	pep:novel scaffold:cavPor3:scaffold_108:1665430:1665810:1 gene:ENSCPOG00000022212 transcript:ENSCPOT00000022288	K21	Acetylation	100% (83.47)	1	43	0	102	23	0	0	0	0	0	0	6	15	28	20	0	0	0	0	3	4	30	43	0	0
ENSCPOP00000015130	pep:novel scaffold:cavPor3:scaffold_108:1665430:1665810:1 gene:ENSCPOG00000022212 transcript:ENSCPOT00000022288	K13	Acetylation	100% (214.99)	1	44	0	110	36	0	0	0	0	0	0	9	17	35	33	0	0	0	0	4	2	56	58	0	0
ENSCPOP00000015130	pep:novel scaffold:cavPor3:scaffold_108:1665430:1665810:1 gene:ENSCPOG00000022212 transcript:ENSCPOT00000022288	K16	Acetylation	100% (182.99)	1	50	0	120	38	0	0	0	0	0	0	9	23	41	36	0	0	0	0	4	4	58	61	0	0
ENSCPOP00000015130	pep:novel scaffold:cavPor3:scaffold_108:1665430:1665810:1 gene:ENSCPOG00000022212 transcript:ENSCPOT00000022288	K17	Acetylation	100% (210.85)	1	53	0	132	34	0	0	0	0	0	0	9	24	48	30	0	0	0	0	3	5	50	65	0	0
ENSCPOP00000015632	pep:novel scaffold:cavPor3:scaffold_2:10925027:10925335:1 gene:ENSCPOG00000023951 transcript:ENSCPOT00000024265	K6	Acetylation	100% (1,000.00)	1	82	12	149	48	2	8	0	5	3	9	16	23	56	52	0	6	1	2	17	17	74	72	4	4
ENSCPOP00000015632	pep:novel scaffold:cavPor3:scaffold_2:10925027:10925335:1 gene:ENSCPOG00000023951 transcript:ENSCPOT00000024265	K17	Acetylation	100% (1,000.00)	1	189	26	282	85	6	6	0	5	3	9	14	39	87	73	0	6	2	1	22	29	118	128	8	8
ENSCPOP00000015632	pep:novel scaffold:cavPor3:scaffold_2:10925027:10925335:1 gene:ENSCPOG00000023951 transcript:ENSCPOT00000024265	K9	Acetylation	100% (1,000.00)	1	161	20	291	92	2	10	0	10	3	12	16	44	97	79	0	12	1	3	25	32	120	118	4	8
ENSCPOP00000015632	pep:novel scaffold:cavPor3:scaffold_2:10925027:10925335:1 gene:ENSCPOG00000023951 transcript:ENSCPOT00000024265	K13	Acetylation	100% (1,000.00)	1	205	26	360	108	8	10	0	10	3	15	23	51	111	100	0	12	2	3	30	37	146	144	8	12
ENSCPOP00000015742	pep:novel scaffold:cavPor3:scaffold_43:7663463:7696221:1 gene:ENSCPOG00000024229 transcript:ENSCPOT00000020193	K211	Acetylation	100% (1,000.00)	1	0	0	0	0	0	0	0	0	0	0	2	2	0	0	0	0	0	0	0	1	3	3	0	0
ENSCPOP00000015742	pep:novel scaffold:cavPor3:scaffold_43:7663463:7696221:1 gene:ENSCPOG00000024229 transcript:ENSCPOT00000020193	K86	Acetylation	100% (131.13)	1	2	0	0	0	0	0	0	0	0	0	2	2	3	3	0	0	0	0	0	0	4	4	0	0
ENSCPOP00000015742	pep:novel scaffold:cavPor3:scaffold_43:7663463:7696221:1 gene:ENSCPOG00000024229 transcript:ENSCPOT00000020193	K178	Acetylation	100% (56.76)	1	12	0	0	0	9	0	0	0	0	3	0	0	0	0	3	0	0	1	0	0	0	5	2	0
ENSCPOP00000015742	pep:novel scaffold:cavPor3:scaffold_43:7663463:7696221:1 gene:ENSCPOG00000024229 transcript:ENSCPOT00000020193	K191	Acetylation	100% (1,000.00)	1	20	0	4	12	0	0	0	0	0	0	0	3	0	0	0	0	0	0	0	1	0	10	0	0
ENSCPOP00000015742	pep:novel scaffold:cavPor3:scaffold_43:7663463:7696221:1 gene:ENSCPOG00000024229 transcript:ENSCPOT00000020193	K80	Acetylation	100% (100.02)	1	31	0	28	0	0	0	0	0	0	0	0	6	11	0	1	3	0	1	0	4	0	0	0	2
ENSCPOP00000015742	pep:novel scaffold:cavPor3:scaffold_43:7663463:7696221:1 gene:ENSCPOG00000024229 transcript:ENSCPOT00000020193	K127	Acetylation	100% (1,000.00)	1	10	0	28	14	0	1	0	4	0	0	6	6	8	0	0	3	0	0	4	4	18	28	0	1
ENSCPOP00000015742	pep:novel scaffold:cavPor3:scaffold_43:7663463:7696221:1 gene:ENSCPOG00000024229 transcript:ENSCPOT00000020193	K184	Acetylation	100% (145.77)	1	70	14	63	18	0	4	28	4	0	0	8	16	24	20	0	10	1	1	14	12	22	27	0	3
ENSCPOP00000015742	pep:novel scaffold:cavPor3:scaffold_43:7663463:7696221:1 gene:ENSCPOG00000024229 transcript:ENSCPOT00000020193	K240	Acetylation	100% (197.81)	1	84	8	105	30	9	4	33	10	7	6	63	27	43	32	12	12	1	2	31	26	137	65	3	8
ENSCPOP00000015745	pep:novel scaffold:cavPor3:scaffold_10:16764342:16768514:1 gene:ENSCPOG00000023214 transcript:ENSCPOT00000026922	K63	Acetylation	100% (1,000.00)	1	0	0	0	0	0	0	0	0	0	0	0	0	0	1	0	0	0	0	0	0	0	0	0	0
ENSCPOP00000015745	pep:novel scaffold:cavPor3:scaffold_10:16764342:16768514:1 gene:ENSCPOG00000023214 transcript:ENSCPOT00000026922	K58	Acetylation	100% (49.62)	1	0	0	2	0	0	0	0	0	0	0	0	0	2	2	0	0	0	0	0	0	0	0	0	0
ENSCPOP00000015876	pep:novel scaffold:cavPor3:scaffold_26:18357834:18375659:-1 gene:ENSCPOG00000023785 transcript:ENSCPOT00000019791	K76	Acetylation	100% (160.91)	1	0	0	0	0	0	6	0	0	0	6	0	0	0	0	0	0	0	2	0	0	0	0	0	0
ENSCPOP00000016071	pep:known scaffold:cavPor3:scaffold_9:41594606:41602141:1 gene:ENSCPOG00000023092 transcript:ENSCPOT00000021512	K487	Acetylation	100% (74.79)	1	2	2	0	0	0	0	0	0	0	0	0	3	0	0	0	0	0	0	1	1	1	0	0	0
ENSCPOP00000016071	pep:known scaffold:cavPor3:scaffold_9:41594606:41602141:1 gene:ENSCPOG00000023092 transcript:ENSCPOT00000021512	K124	Acetylation	100% (187.25)	1	24	0	6	0	0	0	4	0	0	0	15	5	0	0	0	2	0	0	6	3	7	0	2	2
ENSCPOP00000016071	pep:known scaffold:cavPor3:scaffold_9:41594606:41602141:1 gene:ENSCPOG00000023092 transcript:ENSCPOT00000021512	K133	Acetylation	100% (1,000.00)	1	6	6	25	10	0	0	0	0	0	0	4	0	6	0	1	0	0	0	4	4	21	7	0	0
ENSCPOP00000016071	pep:known scaffold:cavPor3:scaffold_9:41594606:41602141:1 gene:ENSCPOG00000023092 transcript:ENSCPOT00000021512	K261	Acetylation	100% (75.35)	1	37	0	10	0	0	0	0	0	0	0	4	7	10	12	0	0	0	0	5	2	6	7	0	1
ENSCPOP00000016071	pep:known scaffold:cavPor3:scaffold_9:41594606:41602141:1 gene:ENSCPOG00000023092 transcript:ENSCPOT00000021512	K524	Acetylation	100% (1,000.00)	1	104	40	60	60	8	0	35	10	3	0	63	63	33	33	12	6	2	1	28	28	12	24	8	4
ENSCPOP00000016138	pep:novel scaffold:cavPor3:scaffold_70:264329:268759:1 gene:ENSCPOG00000020449 transcript:ENSCPOT00000021458	K132	Acetylation	100% (1,000.00)	1	0	0	0	0	2	0	0	0	0	0	0	0	0	0	0	0	0	2	0	0	3	3	0	0
ENSCPOP00000016138	pep:novel scaffold:cavPor3:scaffold_70:264329:268759:1 gene:ENSCPOG00000020449 transcript:ENSCPOT00000021458	K118	Acetylation	100% (126.02)	1	0	0	0	0	0	0	10	2	0	0	0	0	0	0	0	0	0	0	0	0	0	0	1	5
ENSCPOP00000016138	pep:novel scaffold:cavPor3:scaffold_70:264329:268759:1 gene:ENSCPOG00000020449 transcript:ENSCPOT00000021458	K107	Acetylation	100% (1,000.00)	1	0	0	0	0	0	0	19	9	0	0	0	0	0	0	0	0	1	0	0	0	0	0	5	2
ENSCPOP00000016138	pep:novel scaffold:cavPor3:scaffold_70:264329:268759:1 gene:ENSCPOG00000020449 transcript:ENSCPOT00000021458	K194	Acetylation	100% (1,000.00)	1	0	0	0	0	6	2	26	8	0	0	0	0	0	0	0	0	2	2	0	0	0	0	4	6
ENSCPOP00000016471	pep:novel scaffold:cavPor3:scaffold_80:5809338:5818944:-1 gene:ENSCPOG00000019609 transcript:ENSCPOT00000025445	K107	Acetylation	100% (91.66)	1	0	0	0	0	0	0	0	0	0	0	0	0	0	0	0	0	1	0	0	0	0	0	0	0
ENSCPOP00000016471	pep:novel scaffold:cavPor3:scaffold_80:5809338:5818944:-1 gene:ENSCPOG00000019609 transcript:ENSCPOT00000025445	K247	Acetylation	100% (1,000.00)	1	0	0	0	0	1	1	0	0	0	0	0	0	0	0	0	0	0	0	0	0	0	0	0	0
ENSCPOP00000016471	pep:novel scaffold:cavPor3:scaffold_80:5809338:5818944:-1 gene:ENSCPOG00000019609 transcript:ENSCPOT00000025445	K32	Acetylation	100% (93.00)	1	0	0	0	0	0	0	0	0	0	2	0	0	0	0	0	0	1	1	0	0	0	0	0	0
ENSCPOP00000016471	pep:novel scaffold:cavPor3:scaffold_80:5809338:5818944:-1 gene:ENSCPOG00000019609 transcript:ENSCPOT00000025445	K304	Acetylation	100% (55.25)	1	0	0	0	0	0	0	0	0	0	2	0	0	0	0	0	0	1	2	0	0	0	0	0	0
ENSCPOP00000016471	pep:novel scaffold:cavPor3:scaffold_80:5809338:5818944:-1 gene:ENSCPOG00000019609 transcript:ENSCPOT00000025445	K298	Acetylation	100% (98.58)	1	0	0	0	0	0	2	0	0	0	3	0	0	0	0	0	0	0	1	0	0	0	0	0	0
ENSCPOP00000016471	pep:novel scaffold:cavPor3:scaffold_80:5809338:5818944:-1 gene:ENSCPOG00000019609 transcript:ENSCPOT00000025445	K41	Acetylation	100% (1,000.00)	1	0	0	0	0	10	0	0	0	0	0	0	0	0	0	0	0	1	1	0	0	0	0	0	0
ENSCPOP00000016471	pep:novel scaffold:cavPor3:scaffold_80:5809338:5818944:-1 gene:ENSCPOG00000019609 transcript:ENSCPOT00000025445	K101	Acetylation	100% (48.99)	1	0	0	0	0	6	0	0	0	3	3	0	0	0	0	0	0	1	1	0	0	0	0	0	0
ENSCPOP00000016471	pep:novel scaffold:cavPor3:scaffold_80:5809338:5818944:-1 gene:ENSCPOG00000019609 transcript:ENSCPOT00000025445	K116	Acetylation	100% (1,000.00)	1	0	0	0	0	10	2	0	0	0	3	0	0	0	0	0	0	2	0	0	0	0	0	0	0
ENSCPOP00000016471	pep:novel scaffold:cavPor3:scaffold_80:5809338:5818944:-1 gene:ENSCPOG00000019609 transcript:ENSCPOT00000025445	K259	Acetylation	100% (145.06)	1	0	0	0	0	14	0	0	0	3	0	0	0	0	0	0	0	1	2	0	0	0	0	0	0
ENSCPOP00000016471	pep:novel scaffold:cavPor3:scaffold_80:5809338:5818944:-1 gene:ENSCPOG00000019609 transcript:ENSCPOT00000025445	K15	Acetylation	100% (213.31)	1	0	0	0	0	8	2	0	0	6	6	0	0	0	0	0	0	1	1	0	0	0	0	0	0
ENSCPOP00000016471	pep:novel scaffold:cavPor3:scaffold_80:5809338:5818944:-1 gene:ENSCPOG00000019609 transcript:ENSCPOT00000025445	K307	Acetylation	100% (1,000.00)	1	0	0	4	0	6	0	0	0	3	3	0	0	0	0	0	0	0	1	0	0	0	10	0	0
ENSCPOP00000016471	pep:novel scaffold:cavPor3:scaffold_80:5809338:5818944:-1 gene:ENSCPOG00000019609 transcript:ENSCPOT00000025445	K242	Acetylation	100% (108.88)	1	0	0	9	0	41	10	0	0	56	6	0	0	0	0	0	0	7	3	0	0	0	25	0	0
ENSCPOP00000016731	pep:novel scaffold:cavPor3:scaffold_2:10917407:10917787:-1 gene:ENSCPOG00000020265 transcript:ENSCPOT00000025200	K6	Acetylation	100% (42.62)	1	0	0	0	0	0	0	0	0	0	0	0	0	0	1	0	0	0	0	0	0	2	2	0	0
ENSCPOP00000016731	pep:novel scaffold:cavPor3:scaffold_2:10917407:10917787:-1 gene:ENSCPOG00000020265 transcript:ENSCPOT00000025200	K109	Acetylation	100% (133.50)	1	0	0	1	1	0	0	0	0	0	0	0	0	0	2	0	0	0	0	0	0	0	6	0	0
ENSCPOP00000016731	pep:novel scaffold:cavPor3:scaffold_2:10917407:10917787:-1 gene:ENSCPOG00000020265 transcript:ENSCPOT00000025200	K12	Acetylation	100% (178.98)	1	8	0	23	12	0	0	0	0	0	0	0	8	10	9	0	0	0	0	0	0	12	19	0	0
ENSCPOP00000016731	pep:novel scaffold:cavPor3:scaffold_2:10917407:10917787:-1 gene:ENSCPOG00000020265 transcript:ENSCPOT00000025200	K21	Acetylation	100% (79.13)	1	18	0	36	17	0	0	0	0	0	0	0	6	17	14	0	0	0	0	2	0	23	24	0	0
ENSCPOP00000016731	pep:novel scaffold:cavPor3:scaffold_2:10917407:10917787:-1 gene:ENSCPOG00000020265 transcript:ENSCPOT00000025200	K13	Acetylation	100% (223.96)	1	30	0	65	28	0	0	0	0	0	0	0	15	31	24	0	0	0	0	3	0	39	42	0	0
ENSCPOP00000016731	pep:novel scaffold:cavPor3:scaffold_2:10917407:10917787:-1 gene:ENSCPOG00000020265 transcript:ENSCPOT00000025200	K16	Acetylation	100% (174.38)	1	30	0	69	29	0	0	0	0	0	0	0	15	32	24	0	0	0	0	3	0	47	45	0	0
ENSCPOP00000016731	pep:novel scaffold:cavPor3:scaffold_2:10917407:10917787:-1 gene:ENSCPOG00000020265 transcript:ENSCPOT00000025200	K17	Acetylation	100% (192.04)	1	32	0	70	30	0	0	0	0	0	0	0	14	37	24	0	0	0	0	3	0	44	41	0	0
ENSCPOP00000016787	pep:novel scaffold:cavPor3:scaffold_4:3463966:3469793:1 gene:ENSCPOG00000024082 transcript:ENSCPOT00000019892	K22	Acetylation	100% (1,000.00)	1	0	0	0	0	10	0	0	0	0	0	0	0	0	0	0	0	1	0	0	0	0	0	0	0
ENSCPOP00000016987	pep:novel scaffold:cavPor3:scaffold_104:3179479:3187399:1 gene:ENSCPOG00000002588 transcript:ENSCPOT00000002622	K91	Acetylation	100% (66.60)	1	0	0	0	0	0	0	0	0	0	0	0	0	0	0	0	0	0	0	1	0	0	0	0	0
ENSCPOP00000016987	pep:novel scaffold:cavPor3:scaffold_104:3179479:3187399:1 gene:ENSCPOG00000002588 transcript:ENSCPOT00000002622	K468	Acetylation	100% (1,000.00)	1	0	1	0	0	0	0	0	0	0	0	0	0	0	0	0	0	0	0	0	0	0	0	0	0
ENSCPOP00000016987	pep:novel scaffold:cavPor3:scaffold_104:3179479:3187399:1 gene:ENSCPOG00000002588 transcript:ENSCPOT00000002622	K472	Acetylation	100% (70.53)	1	0	0	0	0	0	0	0	0	0	0	0	2	0	0	0	0	0	0	0	1	0	0	0	0
ENSCPOP00000016987	pep:novel scaffold:cavPor3:scaffold_104:3179479:3187399:1 gene:ENSCPOG00000002588 transcript:ENSCPOT00000002622	K359	Acetylation	100% (38.93)	1	2	0	0	0	0	0	0	0	0	0	0	3	0	0	0	0	0	0	0	1	0	0	0	0
ENSCPOP00000016987	pep:novel scaffold:cavPor3:scaffold_104:3179479:3187399:1 gene:ENSCPOG00000002588 transcript:ENSCPOT00000002622	K352	Acetylation	100% (95.60)	1	14	0	0	0	0	1	0	0	0	0	0	3	0	0	0	0	0	0	0	0	0	0	0	0
ENSCPOP00000016987	pep:novel scaffold:cavPor3:scaffold_104:3179479:3187399:1 gene:ENSCPOG00000002588 transcript:ENSCPOT00000002622	K125	Acetylation	100% (74.45)	1	12	0	0	0	1	1	0	0	0	2	0	5	0	0	0	0	0	0	0	3	0	0	0	0
ENSCPOP00000016987	pep:novel scaffold:cavPor3:scaffold_104:3179479:3187399:1 gene:ENSCPOG00000002588 transcript:ENSCPOT00000002622	K130	Acetylation	100% (74.74)	1	4	0	18	0	2	0	0	0	0	0	0	5	1	1	0	0	1	0	3	3	7	0	0	0
ENSCPOP00000017061	pep:novel scaffold:cavPor3:scaffold_27:3315212:3324490:1 gene:ENSCPOG00000026132 transcript:ENSCPOT00000021870	K268	Acetylation	100% (44.85)	1	0	0	1	0	0	0	0	0	0	0	0	0	0	0	0	0	0	0	0	0	0	0	0	0
ENSCPOP00000017061	pep:novel scaffold:cavPor3:scaffold_27:3315212:3324490:1 gene:ENSCPOG00000026132 transcript:ENSCPOT00000021870	K390	Acetylation	100% (68.50)	1	0	1	4	0	0	0	0	0	0	0	0	0	0	0	0	0	0	0	0	0	3	0	0	0
ENSCPOP00000017061	pep:novel scaffold:cavPor3:scaffold_27:3315212:3324490:1 gene:ENSCPOG00000026132 transcript:ENSCPOT00000021870	K281	Acetylation	100% (1,000.00)	1	15	3	8	0	0	0	0	1	0	0	0	0	0	0	0	0	0	0	2	2	5	5	0	0
ENSCPOP00000017061	pep:novel scaffold:cavPor3:scaffold_27:3315212:3324490:1 gene:ENSCPOG00000026132 transcript:ENSCPOT00000021870	K609	Acetylation	100% (1,000.00)	1	43	3	0	0	1	0	4	1	1	0	5	16	0	0	0	0	0	0	7	6	12	22	0	0
ENSCPOP00000017103	pep:known scaffold:cavPor3:scaffold_60:10525123:10534088:1 gene:ENSCPOG00000000378 transcript:ENSCPOT00000026680	K197	Acetylation	100% (1,000.00)	1	0	0	0	0	2	0	0	0	0	0	0	0	0	0	0	0	1	0	0	0	0	0	0	0
ENSCPOP00000017103	pep:known scaffold:cavPor3:scaffold_60:10525123:10534088:1 gene:ENSCPOG00000000378 transcript:ENSCPOT00000026680	K70	Acetylation	100% (129.24)	1	6	0	0	0	1	0	0	0	0	0	0	0	0	0	0	0	0	0	0	0	0	1	0	0
ENSCPOP00000017103	pep:known scaffold:cavPor3:scaffold_60:10525123:10534088:1 gene:ENSCPOG00000000378 transcript:ENSCPOT00000026680	K117	Acetylation	100% (1,000.00)	1	20	0	28	7	6	2	0	0	0	3	0	6	0	0	4	0	0	1	0	0	0	0	0	0
ENSCPOP00000017103	pep:known scaffold:cavPor3:scaffold_60:10525123:10534088:1 gene:ENSCPOG00000000378 transcript:ENSCPOT00000026680	K125	Acetylation	100% (53.88)	1	64	8	42	21	10	2	15	5	3	3	18	11	0	13	6	0	2	1	14	9	30	15	4	4
ENSCPOP00000017103	pep:known scaffold:cavPor3:scaffold_60:10525123:10534088:1 gene:ENSCPOG00000000378 transcript:ENSCPOT00000026680	K63	Acetylation	100% (136.27)	1	168	8	160	40	24	12	55	10	9	9	36	45	55	22	12	0	3	2	35	28	36	72	12	8
ENSCPOP00000017287	pep:novel scaffold:cavPor3:scaffold_7:51658761:51669793:1 gene:ENSCPOG00000025939 transcript:ENSCPOT00000020784	K44	Acetylation	100% (59.17)	1	0	0	0	0	3	0	0	0	0	0	0	0	0	0	0	0	0	0	0	0	0	0	0	0
ENSCPOP00000017287	pep:novel scaffold:cavPor3:scaffold_7:51658761:51669793:1 gene:ENSCPOG00000025939 transcript:ENSCPOT00000020784	K127	Acetylation	100% (38.03)	1	0	0	0	0	2	0	4	0	3	0	0	0	0	0	0	0	1	0	0	0	0	0	0	0
ENSCPOP00000017464	pep:novel scaffold:cavPor3:scaffold_38:20476612:20477174:1 gene:ENSCPOG00000020380 transcript:ENSCPOT00000027756	K46	Acetylation	100% (74.98)	1	0	0	1	1	0	0	0	0	0	0	0	0	0	0	0	0	0	0	0	0	0	0	0	0
ENSCPOP00000017464	pep:novel scaffold:cavPor3:scaffold_38:20476612:20477174:1 gene:ENSCPOG00000020380 transcript:ENSCPOT00000027756	K17	Acetylation	100% (47.71)	1	0	0	1	0	0	0	0	0	0	0	0	0	4	2	0	0	0	0	0	0	6	3	0	0
ENSCPOP00000017692	pep:known scaffold:cavPor3:scaffold_107:691824:695600:-1 gene:ENSCPOG00000026350 transcript:ENSCPOT00000027490	K140	Acetylation	100% (43.47)	1	0	0	0	0	0	0	0	0	0	0	0	0	0	0	0	0	1	0	0	0	0	0	0	0
ENSCPOP00000017692	pep:known scaffold:cavPor3:scaffold_107:691824:695600:-1 gene:ENSCPOG00000026350 transcript:ENSCPOT00000027490	K332	Acetylation	100% (1,000.00)	1	0	0	0	0	0	1	0	0	0	0	0	0	0	0	0	0	0	0	0	0	0	0	0	0
ENSCPOP00000017692	pep:known scaffold:cavPor3:scaffold_107:691824:695600:-1 gene:ENSCPOG00000026350 transcript:ENSCPOT00000027490	K192	Acetylation	100% (1,000.00)	1	0	0	0	0	2	0	0	0	2	0	0	0	4	0	0	0	0	0	0	0	0	0	3	0
ENSCPOP00000017704	pep:novel scaffold:cavPor3:scaffold_81:3026472:3041363:-1 gene:ENSCPOG00000023840 transcript:ENSCPOT00000025252	K28	Acetylation	100% (71.24)	1	3	0	0	0	0	0	0	0	0	0	0	0	0	0	0	0	0	0	0	0	0	0	0	0
ENSCPOP00000017704	pep:novel scaffold:cavPor3:scaffold_81:3026472:3041363:-1 gene:ENSCPOG00000023840 transcript:ENSCPOT00000025252	K61	Acetylation	100% (1,000.00)	1	4	0	0	0	0	0	0	0	0	0	0	0	0	0	0	1	0	0	0	0	3	0	0	0
ENSCPOP00000017704	pep:novel scaffold:cavPor3:scaffold_81:3026472:3041363:-1 gene:ENSCPOG00000023840 transcript:ENSCPOT00000025252	K20	Acetylation	100% (155.64)	1	10	2	6	3	0	0	0	0	0	0	0	0	0	0	0	0	0	0	0	0	0	0	0	1
ENSCPOP00000017704	pep:novel scaffold:cavPor3:scaffold_81:3026472:3041363:-1 gene:ENSCPOG00000023840 transcript:ENSCPOT00000025252	K224	Acetylation	100% (219.30)	1	20	0	21	0	0	0	14	0	0	0	12	0	8	0	6	0	0	0	4	4	0	9	2	0
ENSCPOP00000017707	pep:novel scaffold:cavPor3:scaffold_81:2011324:2012236:1 gene:ENSCPOG00000022324 transcript:ENSCPOT00000026976	K33	Acetylation	100% (1,000.00)	1	4	0	15	3	0	0	0	0	0	0	0	2	4	0	0	0	0	0	0	0	0	5	0	0
ENSCPOP00000017738	pep:novel scaffold:cavPor3:scaffold_44:4240293:4252180:-1 gene:ENSCPOG00000020159 transcript:ENSCPOT00000025371	K81	Acetylation	100% (51.96)	1	4	0	0	5	0	1	0	0	0	2	0	0	0	0	0	0	0	0	0	3	0	6	0	0
ENSCPOP00000017738	pep:novel scaffold:cavPor3:scaffold_44:4240293:4252180:-1 gene:ENSCPOG00000020159 transcript:ENSCPOT00000025371	K85	Acetylation	100% (1,000.00)	1	12	4	19	5	6	1	0	3	3	2	0	0	0	0	0	0	1	0	0	0	0	0	0	0
ENSCPOP00000018477	pep:novel scaffold:cavPor3:scaffold_10:26104234:26115917:1 gene:ENSCPOG00000021886 transcript:ENSCPOT00000026625	K155	Acetylation	100% (75.88)	1	1	0	2	0	0	0	0	0	0	0	0	0	0	0	0	0	0	0	0	0	0	0	0	0
ENSCPOP00000018477	pep:novel scaffold:cavPor3:scaffold_10:26104234:26115917:1 gene:ENSCPOG00000021886 transcript:ENSCPOT00000026625	K85	Acetylation	100% (42.92)	1	3	0	0	0	4	0	0	0	0	0	0	0	0	0	0	0	1	0	0	0	0	0	0	0
ENSCPOP00000018477	pep:novel scaffold:cavPor3:scaffold_10:26104234:26115917:1 gene:ENSCPOG00000021886 transcript:ENSCPOT00000026625	K67	Acetylation	100% (206.51)	1	8	0	0	0	0	4	0	0	3	3	0	0	0	0	0	0	0	2	0	0	0	0	0	0
ENSCPOP00000018477	pep:novel scaffold:cavPor3:scaffold_10:26104234:26115917:1 gene:ENSCPOG00000021886 transcript:ENSCPOT00000026625	K58	Acetylation	100% (156.90)	1	4	0	12	0	2	2	0	0	2	0	0	3	0	0	0	0	0	1	3	1	5	0	0	0
ENSCPOP00000018477	pep:novel scaffold:cavPor3:scaffold_10:26104234:26115917:1 gene:ENSCPOG00000021886 transcript:ENSCPOT00000026625	K262	Acetylation	100% (106.03)	1	5	0	21	0	10	0	0	0	3	0	6	0	0	0	0	0	1	0	4	0	16	0	0	0
ENSCPOP00000018477	pep:novel scaffold:cavPor3:scaffold_10:26104234:26115917:1 gene:ENSCPOG00000021886 transcript:ENSCPOT00000026625	K78	Acetylation	100% (1,000.00)	1	10	0	21	7	0	6	0	0	3	3	6	12	0	0	0	0	1	2	0	4	8	0	0	0
ENSCPOP00000018791	pep:novel scaffold:cavPor3:scaffold_309:283778:287163:1 gene:ENSCPOG00000022243 transcript:ENSCPOT00000019606	K63	Acetylation	100% (38.93)	1	6	0	0	0	0	0	0	0	0	0	3	3	0	0	0	0	0	0	2	1	4	4	0	0
ENSCPOP00000018791	pep:novel scaffold:cavPor3:scaffold_309:283778:287163:1 gene:ENSCPOG00000022243 transcript:ENSCPOT00000019606	K78	Acetylation	100% (1,000.00)	1	12	3	20	0	0	0	0	1	0	0	4	4	0	6	0	0	0	0	2	2	8	7	0	0
ENSCPOP00000018791	pep:novel scaffold:cavPor3:scaffold_309:283778:287163:1 gene:ENSCPOG00000022243 transcript:ENSCPOT00000019606	K87	Acetylation	100% (1,000.00)	1	22	0	27	1	0	0	0	1	0	0	13	4	7	10	0	0	0	0	1	3	17	25	0	0
ENSCPOP00000018880	pep:novel scaffold:cavPor3:scaffold_7:59059204:59078481:1 gene:ENSCPOG00000026990 transcript:ENSCPOT00000027372	K132	Acetylation	100% (70.86)	1	10	0	0	0	0	0	0	0	0	0	0	0	0	0	0	0	0	0	0	2	0	0	0	0
ENSCPOP00000018962	pep:known scaffold:cavPor3:scaffold_0:32608413:32612491:-1 gene:ENSCPOG00000025732 transcript:ENSCPOT00000024303	K17	Acetylation	100% (41.17)	1	0	0	0	0	0	0	0	0	0	0	0	0	0	0	0	0	0	1	0	0	0	0	0	0
ENSCPOP00000018962	pep:known scaffold:cavPor3:scaffold_0:32608413:32612491:-1 gene:ENSCPOG00000025732 transcript:ENSCPOT00000024303	K40	Acetylation	100% (90.59)	1	0	0	0	0	20	4	0	0	3	3	0	0	0	0	0	0	2	3	0	0	0	0	0	0
ENSCPOP00000019052	pep:novel scaffold:cavPor3:scaffold_30:1810086:1811303:1 gene:ENSCPOG00000023568 transcript:ENSCPOT00000023996	K193	Acetylation	100% (56.46)	1	0	0	0	0	0	4	0	0	0	0	0	0	0	0	0	0	0	1	0	0	0	0	0	0
ENSCPOP00000019052	pep:novel scaffold:cavPor3:scaffold_30:1810086:1811303:1 gene:ENSCPOG00000023568 transcript:ENSCPOT00000023996	K118	Acetylation	100% (1,000.00)	1	0	0	0	0	8	4	0	0	9	6	0	0	0	0	0	0	0	2	0	0	0	0	0	0
ENSCPOP00000019095	pep:known scaffold:cavPor3:scaffold_30:1707717:1720671:1 gene:ENSCPOG00000010145 transcript:ENSCPOT00000025759	K165	Acetylation	100% (1,000.00)	1	2	0	4	0	0	0	0	0	0	0	0	0	0	0	0	0	0	0	0	0	3	3	0	0
ENSCPOP00000019095	pep:known scaffold:cavPor3:scaffold_30:1707717:1720671:1 gene:ENSCPOG00000010145 transcript:ENSCPOT00000025759	K296	Acetylation	100% (39.02)	1	7	0	6	0	0	0	0	0	0	0	0	0	0	0	0	0	0	0	0	0	0	6	0	0
ENSCPOP00000019095	pep:known scaffold:cavPor3:scaffold_30:1707717:1720671:1 gene:ENSCPOG00000010145 transcript:ENSCPOT00000025759	K281	Acetylation	100% (134.86)	1	9	0	8	0	1	0	0	0	0	0	0	0	0	0	0	0	0	0	2	0	5	5	0	0
ENSCPOP00000019095	pep:known scaffold:cavPor3:scaffold_30:1707717:1720671:1 gene:ENSCPOG00000010145 transcript:ENSCPOT00000025759	K203	Acetylation	100% (109.25)	1	9	0	12	4	0	0	0	0	0	0	0	0	0	0	0	0	1	0	2	0	5	5	0	0
ENSCPOP00000019095	pep:known scaffold:cavPor3:scaffold_30:1707717:1720671:1 gene:ENSCPOG00000010145 transcript:ENSCPOT00000025759	K215	Acetylation	100% (1,000.00)	1	8	0	18	0	1	0	0	0	0	0	0	0	0	0	0	0	0	0	0	0	8	4	0	0
ENSCPOP00000019095	pep:known scaffold:cavPor3:scaffold_30:1707717:1720671:1 gene:ENSCPOG00000010145 transcript:ENSCPOT00000025759	K328	Acetylation	100% (132.38)	1	12	0	18	6	4	0	0	0	0	0	5	5	7	0	0	0	1	0	3	0	8	0	0	0
ENSCPOP00000019095	pep:known scaffold:cavPor3:scaffold_30:1707717:1720671:1 gene:ENSCPOG00000010145 transcript:ENSCPOT00000025759	K329	Acetylation	100% (188.75)	1	12	0	18	6	4	0	0	0	0	0	5	7	13	3	0	0	1	0	3	1	12	0	0	0
ENSCPOP00000019095	pep:known scaffold:cavPor3:scaffold_30:1707717:1720671:1 gene:ENSCPOG00000010145 transcript:ENSCPOT00000025759	K91	Acetylation	100% (1,000.00)	1	24	0	30	0	0	0	0	0	2	0	0	0	0	0	0	0	0	1	3	0	18	18	0	0
ENSCPOP00000019095	pep:known scaffold:cavPor3:scaffold_30:1707717:1720671:1 gene:ENSCPOG00000010145 transcript:ENSCPOT00000025759	K324	Acetylation	100% (92.31)	1	24	8	36	0	1	0	0	0	0	2	2	5	6	0	0	0	0	1	0	3	18	14	0	0
ENSCPOP00000019095	pep:known scaffold:cavPor3:scaffold_30:1707717:1720671:1 gene:ENSCPOG00000010145 transcript:ENSCPOT00000025759	K301	Acetylation	100% (114.07)	1	20	5	28	7	6	4	0	0	0	0	6	12	8	1	0	0	1	1	4	8	18	9	0	3
ENSCPOP00000019095	pep:known scaffold:cavPor3:scaffold_30:1707717:1720671:1 gene:ENSCPOG00000010145 transcript:ENSCPOT00000025759	K335	Acetylation	100% (67.08)	1	20	0	26	9	0	0	0	0	0	1	4	11	16	12	0	0	1	0	4	7	24	20	0	0
ENSCPOP00000019095	pep:known scaffold:cavPor3:scaffold_30:1707717:1720671:1 gene:ENSCPOG00000010145 transcript:ENSCPOT00000025759	K185	Acetylation	100% (1,000.00)	1	36	8	48	18	1	0	0	0	0	2	5	0	7	0	0	0	0	0	3	0	16	16	0	0
ENSCPOP00000019095	pep:known scaffold:cavPor3:scaffold_30:1707717:1720671:1 gene:ENSCPOG00000010145 transcript:ENSCPOT00000025759	K307	Acetylation	100% (95.60)	1	28	7	36	9	8	4	12	0	0	0	8	8	10	0	10	0	1	2	6	0	11	11	3	0
ENSCPOP00000019095	pep:known scaffold:cavPor3:scaffold_30:1707717:1720671:1 gene:ENSCPOG00000010145 transcript:ENSCPOT00000025759	K314	Acetylation	100% (241.71)	1	59	7	93	27	18	4	0	0	3	6	6	8	0	0	0	10	4	2	16	16	18	18	8	0
ENSCPOP00000019378	pep:novel scaffold:cavPor3:scaffold_53:9800480:9807357:1 gene:ENSCPOG00000025974 transcript:ENSCPOT00000022467	K77	Acetylation	100% (1,000.00)	1	0	0	0	0	0	2	0	0	0	3	0	0	0	0	0	0	0	1	0	0	0	0	0	0
ENSCPOP00000019510	pep:novel scaffold:cavPor3:scaffold_143:1005745:1006131:1 gene:ENSCPOG00000003879 transcript:ENSCPOT00000003923	K14	Acetylation	100% (53.88)	1	1	0	25	9	0	0	0	0	0	0	0	2	8	4	0	0	0	0	0	0	5	5	0	0
ENSCPOP00000019510	pep:novel scaffold:cavPor3:scaffold_143:1005745:1006131:1 gene:ENSCPOG00000003879 transcript:ENSCPOT00000003923	K5	Acetylation	100% (250.70)	1	9	0	44	17	0	0	0	0	0	0	0	5	13	19	0	0	0	0	1	0	17	17	0	0
ENSCPOP00000019510	pep:novel scaffold:cavPor3:scaffold_143:1005745:1006131:1 gene:ENSCPOG00000003879 transcript:ENSCPOT00000003923	K8	Acetylation	100% (179.07)	1	9	0	45	17	0	0	0	0	0	0	0	5	13	19	0	0	0	0	1	0	17	17	0	0
ENSCPOP00000019510	pep:novel scaffold:cavPor3:scaffold_143:1005745:1006131:1 gene:ENSCPOG00000003879 transcript:ENSCPOT00000003923	K12	Acetylation	100% (92.31)	1	9	0	45	17	0	0	0	0	0	0	0	5	13	19	0	0	0	0	1	0	17	17	0	0
ENSCPOP00000019902	pep:novel scaffold:cavPor3:scaffold_98:4333064:4340592:1 gene:ENSCPOG00000024832 transcript:ENSCPOT00000028027	K113	Acetylation	100% (40.71)	1	2	0	3	0	0	0	0	0	0	0	2	0	0	0	0	0	0	0	0	0	4	0	0	0
ENSCPOP00000019902	pep:novel scaffold:cavPor3:scaffold_98:4333064:4340592:1 gene:ENSCPOG00000024832 transcript:ENSCPOT00000028027	K87	Acetylation	100% (1,000.00)	1	3	0	8	0	0	0	0	0	0	0	0	0	0	0	0	0	0	0	0	0	3	3	0	0
ENSCPOP00000020345	pep:novel scaffold:cavPor3:scaffold_38:18957559:18973731:1 gene:ENSCPOG00000019753 transcript:ENSCPOT00000026554	K36	Acetylation	100% (121.66)	1	4	0	3	0	0	0	0	0	0	0	0	0	0	4	0	0	0	0	0	1	1	10	0	0
ENSCPOP00000020345	pep:novel scaffold:cavPor3:scaffold_38:18957559:18973731:1 gene:ENSCPOG00000019753 transcript:ENSCPOT00000026554	K42	Acetylation	100% (197.65)	1	12	0	8	0	0	0	0	0	0	2	0	15	0	7	0	0	1	1	0	9	3	19	0	0
ENSCPOP00000020345	pep:novel scaffold:cavPor3:scaffold_38:18957559:18973731:1 gene:ENSCPOG00000019753 transcript:ENSCPOT00000026554	K126	Acetylation	100% (1,000.00)	1	16	0	24	6	0	0	0	0	0	2	5	5	7	0	0	0	1	1	3	3	8	8	0	0
ENSCPOP00000020424	pep:novel scaffold:cavPor3:scaffold_44:15161369:15170025:1 gene:ENSCPOG00000025703 transcript:ENSCPOT00000028229	K434	Acetylation	100% (58.33)	1	0	0	0	0	6	0	0	0	0	0	0	0	0	0	0	0	1	0	0	0	0	0	0	0
ENSCPOP00000020451	pep:novel scaffold:cavPor3:scaffold_38:20382197:20382577:-1 gene:ENSCPOG00000027599 transcript:ENSCPOT00000024283	K109	Acetylation	100% (80.02)	1	0	0	1	1	0	0	0	0	0	0	0	0	0	0	0	0	0	0	0	0	0	6	0	0
ENSCPOP00000020451	pep:novel scaffold:cavPor3:scaffold_38:20382197:20382577:-1 gene:ENSCPOG00000027599 transcript:ENSCPOT00000024283	K12	Acetylation	100% (85.57)	1	2	0	3	4	0	0	0	0	0	0	0	0	0	0	0	0	0	0	0	0	0	7	0	0
ENSCPOP00000020451	pep:novel scaffold:cavPor3:scaffold_38:20382197:20382577:-1 gene:ENSCPOG00000027599 transcript:ENSCPOT00000024283	K21	Acetylation	100% (65.94)	1	6	0	7	0	0	0	0	0	0	0	0	0	0	0	0	0	0	0	0	0	5	3	0	0
ENSCPOP00000020451	pep:novel scaffold:cavPor3:scaffold_38:20382197:20382577:-1 gene:ENSCPOG00000027599 transcript:ENSCPOT00000024283	K17	Acetylation	100% (126.53)	1	7	0	15	3	0	0	0	0	0	0	0	0	0	0	0	0	0	0	0	0	5	5	0	0
ENSCPOP00000020451	pep:novel scaffold:cavPor3:scaffold_38:20382197:20382577:-1 gene:ENSCPOG00000027599 transcript:ENSCPOT00000024283	K16	Acetylation	100% (151.62)	1	9	0	17	5	0	0	0	0	0	0	0	0	0	0	0	0	0	0	0	0	3	8	0	0
ENSCPOP00000020451	pep:novel scaffold:cavPor3:scaffold_38:20382197:20382577:-1 gene:ENSCPOG00000027599 transcript:ENSCPOT00000024283	K13	Acetylation	100% (195.75)	1	9	0	17	6	0	0	0	0	0	0	0	0	0	0	0	0	0	0	0	0	3	10	0	0
ENSCPOP00000020666	pep:novel scaffold:cavPor3:scaffold_320:107532:109518:1 gene:ENSCPOG00000020167 transcript:ENSCPOT00000024641	K165	Acetylation	100% (1,000.00)	1	2	1	6	2	0	0	0	0	0	0	0	0	0	0	0	0	0	0	0	0	6	0	0	0
ENSCPOP00000020666	pep:novel scaffold:cavPor3:scaffold_320:107532:109518:1 gene:ENSCPOG00000020167 transcript:ENSCPOT00000024641	K136	Acetylation	100% (1,000.00)	1	27	9	40	10	0	0	1	2	0	0	4	0	12	12	0	0	0	0	2	6	21	14	0	0
ENSCPOP00000020800	pep:novel scaffold:cavPor3:scaffold_10:5237655:5241526:-1 gene:ENSCPOG00000023956 transcript:ENSCPOT00000022727	K68	Acetylation	100% (64.08)	1	0	0	0	0	0	0	0	0	0	0	0	0	0	0	0	0	0	0	0	0	0	2	0	0
ENSCPOP00000002782	pep:known scaffold:cavPor3:scaffold_47:631721:647024:-1 gene:ENSCPOG00000003072 transcript:ENSCPOT00000003114	K184	Acetylation	100% (37.25)	1	0	0	0	0	24	6	5	0	15	15	0	0	0	0	6	0	4	3	0	0	0	0	4	0
ENSCPOP00000004894	pep:novel scaffold:cavPor3:scaffold_28:24703957:24757470:1 gene:ENSCPOG00000005438 transcript:ENSCPOT00000005496	K1525	Acetylation	100% (60.76)	1	6	0	56	0	20	12	22	8	18	21	0	24	0	21	0	0	4	4	0	5	41	53	0	4
ENSCPOP00000006048	pep:novel scaffold:cavPor3:scaffold_0:56808126:56813926:-1 gene:ENSCPOG00000006713 transcript:ENSCPOT00000006781	K354	Acetylation	100% (35.92)	1	10	5	12	6	0	0	4	0	0	0	0	0	1	0	0	3	0	0	4	0	7	0	0	1
ENSCPOP00000009794	pep:novel scaffold:cavPor3:scaffold_98:1033898:1057934:1 gene:ENSCPOG00000010901 transcript:ENSCPOT00000011002	K248	Acetylation	100% (37.35)	1	0	0	0	0	0	0	0	0	0	0	0	0	0	0	0	0	1	0	0	0	0	0	0	0
ENSCPOP00000011330	pep:novel scaffold:cavPor3:scaffold_100:3337618:3347154:-1 gene:ENSCPOG00000012594 transcript:ENSCPOT00000012715	K46	Acetylation	100% (36.45)	1	0	0	0	0	6	0	0	0	3	0	0	0	0	0	0	0	1	0	0	0	0	0	0	0
ENSCPOP00000014862	pep:novel scaffold:cavPor3:scaffold_61:9395190:9400078:-1 gene:ENSCPOG00000020114 transcript:ENSCPOT00000020475	K275	Acetylation	100% (35.81)	1	6	0	0	0	0	0	6	0	0	0	4	8	0	0	0	0	0	1	0	0	5	0	0	0
ENSCPOP00000015130	pep:novel scaffold:cavPor3:scaffold_108:1665430:1665810:1 gene:ENSCPOG00000022212 transcript:ENSCPOT00000022288	K121	Acetylation	100% (37.25)	1	0	0	0	0	0	0	0	0	0	0	0	0	1	0	0	0	0	0	0	0	0	0	0	0
ENSCPOP00000015741	pep:novel scaffold:cavPor3:scaffold_11:49308715:49335199:1 gene:ENSCPOG00000001395 transcript:ENSCPOT00000001414	K735	Acetylation	100% (37.17)	1	0	0	0	0	1	0	0	0	2	0	0	0	0	0	0	0	0	0	0	0	0	0	0	0
ENSCPOP00000016731	pep:novel scaffold:cavPor3:scaffold_2:10917407:10917787:-1 gene:ENSCPOG00000020265 transcript:ENSCPOT00000025200	K121	Acetylation	100% (37.25)	1	0	0	0	0	0	0	0	0	0	0	0	0	1	0	0	0	0	0	0	0	0	0	0	0
ENSCPOP00000011373	pep:novel scaffold:cavPor3:scaffold_28:25045513:25081094:1 gene:ENSCPOG00000012642 transcript:ENSCPOT00000012763	K517	Acetylation	100% (35.06)	1	4	0	6	0	2	0	0	0	0	0	0	5	0	0	0	0	1	0	0	3	0	0	0	0
ENSCPOP00000012305	pep:novel scaffold:cavPor3:scaffold_15:27333037:27338216:1 gene:ENSCPOG00000013666 transcript:ENSCPOT00000013804	K179	Acetylation	100% (34.63)	1	0	0	0	0	0	0	0	0	0	0	0	2	0	0	0	0	0	0	0	0	0	0	0	0
ENSCPOP00000002798	pep:novel scaffold:cavPor3:scaffold_93:4442955:4503564:1 gene:ENSCPOG00000003091 transcript:ENSCPOT00000003134	K87	Acetylation	100% (33.63)	1	1	0	0	0	0	0	0	0	0	0	2	0	0	0	0	0	0	0	0	0	0	0	0	0
ENSCPOP00000005984	pep:novel scaffold:cavPor3:scaffold_42:8074962:8079844:1 gene:ENSCPOG00000006645 transcript:ENSCPOT00000006711	K64	Acetylation	100% (33.70)	1	0	0	0	0	0	0	0	0	0	0	1	0	0	0	0	0	0	0	0	0	0	0	0	0
ENSCPOP00000006718	pep:novel scaffold:cavPor3:scaffold_1:48814222:48823901:1 gene:ENSCPOG00000007447 transcript:ENSCPOT00000007519	K92	Acetylation	100% (33.70)	1	0	0	10	0	0	0	0	0	0	2	0	4	0	0	0	0	1	1	0	3	1	6	0	0
ENSCPOP00000011074	pep:novel scaffold:cavPor3:scaffold_107:589423:596421:1 gene:ENSCPOG00000012311 transcript:ENSCPOT00000012428	K127	Acetylation	100% (50.89)	1	0	0	8	0	0	0	0	0	0	0	0	0	5	2	0	0	0	0	0	0	6	9	0	0
ENSCPOP00000013906	pep:novel scaffold:cavPor3:scaffold_4:5796066:5808668:1 gene:ENSCPOG00000015423 transcript:ENSCPOT00000015574	K53	Acetylation	100% (33.96)	1	0	0	0	0	0	0	0	0	0	0	0	0	0	0	0	0	0	0	0	0	0	1	0	0
ENSCPOP00000009655	pep:novel scaffold:cavPor3:scaffold_48:1736056:1745695:-1 gene:ENSCPOG00000010755 transcript:ENSCPOT00000010853	K103	Acetylation	100% (65.02)	1	0	0	0	0	0	0	0	0	0	0	0	0	0	0	0	0	1	0	0	0	0	0	0	0
ENSCPOP00000017061	pep:novel scaffold:cavPor3:scaffold_27:3315212:3324490:1 gene:ENSCPOG00000026132 transcript:ENSCPOT00000021870	K480	Acetylation	100% (32.35)	1	6	0	16	2	0	0	0	0	0	0	0	0	0	0	0	0	0	0	2	0	0	0	0	0
ENSCPOP00000008856	pep:novel scaffold:cavPor3:scaffold_13:43106696:43133822:-1 gene:ENSCPOG00000009871 transcript:ENSCPOT00000009960	K215	Acetylation	100% (31.31)	0.999999	1	0	0	0	0	0	0	0	0	0	0	0	0	0	0	0	0	0	0	0	0	0	0	0
ENSCPOP00000010349	pep:novel scaffold:cavPor3:scaffold_321:65916:79243:-1 gene:ENSCPOG00000011506 transcript:ENSCPOT00000011614	K298	Acetylation	100% (31.24)	0.999999	0	0	0	0	0	0	0	0	0	0	0	0	0	0	0	0	0	0	1	0	0	0	0	0
ENSCPOP00000010729	pep:novel scaffold:cavPor3:scaffold_227:557790:566850:-1 gene:ENSCPOG00000011926 transcript:ENSCPOT00000012041	K230	Acetylation	100% (31.31)	0.999999	0	0	0	0	0	0	0	0	0	0	0	0	0	0	0	0	1	0	0	0	0	0	0	0
ENSCPOP00000010265	pep:novel scaffold:cavPor3:scaffold_90:789763:796018:1 gene:ENSCPOG00000011419 transcript:ENSCPOT00000011525	K238	Acetylation	100% (31.19)	0.999999	0	0	0	0	0	0	0	0	0	0	0	0	0	0	0	0	1	1	2	0	0	0	0	0
ENSCPOP00000016071	pep:known scaffold:cavPor3:scaffold_9:41594606:41602141:1 gene:ENSCPOG00000023092 transcript:ENSCPOT00000021512	K482	Acetylation	100% (30.96)	0.999999	2	0	0	0	0	0	0	0	0	0	0	0	0	0	0	0	0	0	0	0	0	1	0	0
ENSCPOP00000019095	pep:known scaffold:cavPor3:scaffold_30:1707717:1720671:1 gene:ENSCPOG00000010145 transcript:ENSCPOT00000025759	K239	Acetylation	100% (30.94)	0.999999	0	0	0	0	0	0	0	0	0	0	0	0	0	0	0	0	0	0	0	0	1	1	0	0
ENSCPOP00000012673	pep:novel scaffold:cavPor3:scaffold_2:35863251:35875058:1 gene:ENSCPOG00000014070 transcript:ENSCPOT00000014212	K221	Acetylation	100% (64.33)	0.999999	0	0	0	0	0	0	0	0	0	0	0	0	0	0	0	0	0	0	0	0	5	0	0	0
ENSCPOP00000002046	pep:novel scaffold:cavPor3:scaffold_29:13436911:13515990:-1 gene:ENSCPOG00000002255 transcript:ENSCPOT00000002287	K166	Acetylation	100% (30.21)	0.999999	4	0	4	0	0	0	0	0	0	0	0	0	0	0	0	0	0	0	0	0	3	0	0	0
ENSCPOP00000000235	pep:known scaffold:cavPor3:scaffold_4:20169103:20169845:1 gene:ENSCPOG00000000267 transcript:ENSCPOT00000000270	K57	Acetylation	100% (30.00)	0.999999	0	0	0	0	6	4	0	0	12	9	0	0	0	4	0	0	3	2	0	0	5	0	0	0
ENSCPOP00000004239	pep:novel scaffold:cavPor3:scaffold_193:313917:314517:-1 gene:ENSCPOG00000004707 transcript:ENSCPOT00000004757	K37	Acetylation	100% (30.01)	0.999999	0	0	0	0	0	0	0	0	0	0	0	0	0	0	0	0	1	0	0	0	2	4	0	0
ENSCPOP00000004877	pep:novel scaffold:cavPor3:scaffold_18:8160066:8185370:1 gene:ENSCPOG00000005418 transcript:ENSCPOT00000005476	K189	Acetylation	100% (39.56)	0.999999	16	0	9	12	0	0	0	2	0	0	0	10	8	20	0	2	0	0	0	4	10	18	0	0
ENSCPOP00000007630	pep:novel scaffold:cavPor3:scaffold_10:34101089:34115102:1 gene:ENSCPOG00000008488 transcript:ENSCPOT00000008565	K67	Acetylation	100% (30.01)	0.999999	0	0	0	0	0	0	0	0	0	0	0	0	0	0	0	0	0	0	1	0	2	0	0	0
ENSCPOP00000009440	pep:novel scaffold:cavPor3:scaffold_80:560729:570896:-1 gene:ENSCPOG00000010512 transcript:ENSCPOT00000010607	K61	Acetylation	100% (30.01)	0.999999	3	0	0	0	0	0	2	1	0	0	4	4	0	0	0	0	0	0	0	2	0	0	0	0
ENSCPOP00000010440	pep:novel scaffold:cavPor3:scaffold_9:3588155:3594238:-1 gene:ENSCPOG00000011606 transcript:ENSCPOT00000011718	K98	Acetylation	100% (30.01)	0.999999	0	0	0	0	0	0	0	0	0	0	0	2	0	0	0	0	0	0	0	1	0	0	0	0
ENSCPOP00000003669	pep:novel scaffold:cavPor3:scaffold_4:46683612:46685713:-1 gene:ENSCPOG00000004067 transcript:ENSCPOT00000004112	K179	Acetylation	100% (29.90)	0.999999	0	0	0	0	6	2	0	5	3	3	0	0	0	0	0	0	0	1	0	0	0	0	0	4
ENSCPOP00000007755	pep:novel scaffold:cavPor3:scaffold_1:33030942:33052447:-1 gene:ENSCPOG00000008633 transcript:ENSCPOT00000008711	K396	Acetylation	100% (29.84)	0.999999	0	0	0	0	1	0	0	0	0	0	0	0	0	0	0	0	0	0	0	0	0	0	0	0
ENSCPOP00000008228	pep:novel scaffold:cavPor3:scaffold_22:23562397:23583692:1 gene:ENSCPOG00000009164 transcript:ENSCPOT00000009247	K236	Acetylation	100% (29.90)	0.999999	9	0	0	0	1	0	0	0	0	0	0	4	0	0	0	0	0	0	2	0	0	0	0	0
ENSCPOP00000011954	pep:novel scaffold:cavPor3:scaffold_53:7298438:7312532:-1 gene:ENSCPOG00000013278 transcript:ENSCPOT00000013407	K128	Acetylation	100% (29.90)	0.999999	12	0	5	0	0	0	0	0	2	0	0	0	0	6	0	0	1	0	0	3	7	0	0	0
ENSCPOP00000017692	pep:known scaffold:cavPor3:scaffold_107:691824:695600:-1 gene:ENSCPOG00000026350 transcript:ENSCPOT00000027490	K105	Acetylation	100% (29.84)	0.999999	0	0	0	0	1	0	0	0	0	0	0	0	0	0	0	0	0	0	0	0	0	0	0	0
ENSCPOP00000018421	pep:novel scaffold:cavPor3:scaffold_119:842252:849252:1 gene:ENSCPOG00000022072 transcript:ENSCPOT00000015086	K179	Acetylation	100% (29.90)	0.999999	0	0	0	0	1	1	2	0	0	0	0	0	0	0	0	0	0	0	0	0	0	0	0	0
ENSCPOP00000011409	pep:novel scaffold:cavPor3:scaffold_43:5607266:5658730:-1 gene:ENSCPOG00000012683 transcript:ENSCPOT00000012804	K128	Acetylation	100% (29.13)	0.999999	0	0	0	0	0	0	0	0	0	0	0	0	0	0	0	0	1	0	0	0	2	0	0	0
ENSCPOP00000012232	pep:known scaffold:cavPor3:scaffold_13:41687356:41701856:-1 gene:ENSCPOG00000013587 transcript:ENSCPOT00000013722	K58	Acetylation	100% (58.20)	0.999999	0	0	0	0	0	0	0	0	0	1	0	0	0	0	0	0	0	0	0	0	0	0	0	0
ENSCPOP00000013564	pep:novel scaffold:cavPor3:scaffold_136:798095:818006:1 gene:ENSCPOG00000015048 transcript:ENSCPOT00000015195	K263	Acetylation	100% (28.64)	0.999998	0	0	0	0	0	0	0	0	0	0	0	0	0	0	0	0	0	0	1	0	0	0	0	0
ENSCPOP00000010440	pep:novel scaffold:cavPor3:scaffold_9:3588155:3594238:-1 gene:ENSCPOG00000011606 transcript:ENSCPOT00000011718	K213	Acetylation	100% (56.63)	0.999998	6	0	0	0	0	0	0	0	0	0	0	3	0	0	0	0	0	0	1	1	2	0	0	0
ENSCPOP00000004877	pep:novel scaffold:cavPor3:scaffold_18:8160066:8185370:1 gene:ENSCPOG00000005418 transcript:ENSCPOT00000005476	K333	Acetylation	100% (28.23)	0.999998	0	0	0	0	0	0	0	0	0	0	0	0	0	1	0	0	0	0	0	0	0	0	0	0
ENSCPOP00000016987	pep:novel scaffold:cavPor3:scaffold_104:3179479:3187399:1 gene:ENSCPOG00000002588 transcript:ENSCPOT00000002622	K389	Acetylation	100% (28.23)	0.999998	20	0	30	0	0	0	0	0	2	2	5	0	8	14	0	0	2	0	6	0	26	22	0	0
ENSCPOP00000004877	pep:novel scaffold:cavPor3:scaffold_18:8160066:8185370:1 gene:ENSCPOG00000005418 transcript:ENSCPOT00000005476	K349	Acetylation	100% (27.96)	0.999997	1	0	0	0	0	0	0	0	0	0	0	0	0	0	0	0	0	0	0	0	0	0	0	0
ENSCPOP00000016009	pep:novel scaffold:cavPor3:scaffold_42:5264816:5267777:1 gene:ENSCPOG00000021239 transcript:ENSCPOT00000027847	K86	Acetylation	100% (27.16)	0.999996	0	0	0	0	0	0	0	0	0	0	0	0	0	0	0	0	0	0	0	1	0	0	0	0
ENSCPOP00000016987	pep:novel scaffold:cavPor3:scaffold_104:3179479:3187399:1 gene:ENSCPOG00000002588 transcript:ENSCPOT00000002622	K202	Acetylation	100% (43.47)	0.999996	0	0	0	0	0	0	0	0	0	0	1	2	0	0	0	0	0	0	1	0	0	0	0	0
ENSCPOP00000018791	pep:novel scaffold:cavPor3:scaffold_309:283778:287163:1 gene:ENSCPOG00000022243 transcript:ENSCPOT00000019606	K65	Acetylation	100% (53.88)	0.999996	0	0	3	1	0	0	0	0	0	0	0	0	4	6	0	0	0	0	0	0	6	9	0	0
ENSCPOP00000008361	pep:novel scaffold:cavPor3:scaffold_20:18933903:18953714:1 gene:ENSCPOG00000009316 transcript:ENSCPOT00000009401	K273	Acetylation	100% (29.90)	0.999995	96	6	62	0	15	1	21	4	4	3	7	24	10	10	5	10	1	2	6	24	11	21	10	14
ENSCPOP00000008701	pep:novel scaffold:cavPor3:scaffold_2:47513596:47554798:1 gene:ENSCPOG00000009695 transcript:ENSCPOT00000009782	K434	Acetylation	100% (26.38)	0.999995	2	0	0	0	0	0	0	0	0	0	0	0	0	0	0	0	0	0	0	0	0	0	0	0
ENSCPOP00000009794	pep:novel scaffold:cavPor3:scaffold_98:1033898:1057934:1 gene:ENSCPOG00000010901 transcript:ENSCPOT00000011002	K220	Acetylation	100% (52.15)	0.999994	0	0	0	0	6	4	0	0	0	6	0	0	0	0	0	0	1	1	0	0	0	4	0	0
ENSCPOP00000013564	pep:novel scaffold:cavPor3:scaffold_136:798095:818006:1 gene:ENSCPOG00000015048 transcript:ENSCPOT00000015195	K190	Acetylation	100% (25.74)	0.999993	8	0	4	0	0	0	0	0	0	0	0	3	0	0	0	0	0	0	3	0	2	5	0	0
ENSCPOP00000001880	pep:known scaffold:cavPor3:scaffold_10:20672255:20676454:-1 gene:ENSCPOG00000002077 transcript:ENSCPOT00000002104	K328	Acetylation	100% (25.22)	0.999991	0	0	0	0	0	0	0	0	0	0	0	0	0	0	0	0	0	1	0	0	0	0	0	0
ENSCPOP00000010829	pep:novel scaffold:cavPor3:scaffold_4:40014146:40023545:-1 gene:ENSCPOG00000012038 transcript:ENSCPOT00000012154	K97	Acetylation	100% (50.01)	0.99999	2	0	8	0	0	0	0	0	0	0	0	0	0	0	0	0	0	0	0	0	4	6	0	0
ENSCPOP00000015876	pep:novel scaffold:cavPor3:scaffold_26:18357834:18375659:-1 gene:ENSCPOG00000023785 transcript:ENSCPOT00000019791	K132	Acetylation	100% (24.84)	0.999989	0	0	0	0	4	2	0	0	3	6	0	0	0	0	0	0	1	1	0	0	0	0	0	0
ENSCPOP00000002487	pep:novel scaffold:cavPor3:scaffold_115:1976162:2030121:1 gene:ENSCPOG00000002739 transcript:ENSCPOT00000002774	K510	Acetylation	100% (24.82)	0.999989	0	0	0	0	0	0	0	1	0	0	0	0	0	0	0	0	0	0	0	0	0	0	0	0
ENSCPOP00000013564	pep:novel scaffold:cavPor3:scaffold_136:798095:818006:1 gene:ENSCPOG00000015048 transcript:ENSCPOT00000015195	K251	Acetylation	100% (48.53)	0.999986	2	0	4	0	0	0	0	0	0	0	3	2	0	0	0	0	0	0	1	2	5	0	0	0
ENSCPOP00000009602	pep:novel scaffold:cavPor3:scaffold_23:16216334:16250910:-1 gene:ENSCPOG00000010700 transcript:ENSCPOT00000010797	K60	Acetylation	100% (23.92)	0.999984	12	0	0	0	0	0	0	0	0	0	0	3	0	0	0	0	0	0	0	2	8	0	0	0
ENSCPOP00000016471	pep:novel scaffold:cavPor3:scaffold_80:5809338:5818944:-1 gene:ENSCPOG00000019609 transcript:ENSCPOT00000025445	K265	Acetylation	100% (23.88)	0.999983	0	0	0	0	0	0	0	0	2	2	0	0	0	0	0	0	1	1	0	0	0	0	0	0
ENSCPOP00000017692	pep:known scaffold:cavPor3:scaffold_107:691824:695600:-1 gene:ENSCPOG00000026350 transcript:ENSCPOT00000027490	K257	Acetylation	100% (23.88)	0.999983	0	0	0	0	2	0	0	0	0	0	0	0	0	0	0	0	0	0	0	0	0	0	0	0
ENSCPOP00000001873	pep:novel scaffold:cavPor3:scaffold_56:4476537:4480571:1 gene:ENSCPOG00000002069 transcript:ENSCPOT00000002096	K101	Acetylation	100% (23.44)	0.99998	0	0	0	0	0	0	0	0	0	0	0	0	0	0	0	0	0	0	1	0	0	0	0	0
ENSCPOP00000009440	pep:novel scaffold:cavPor3:scaffold_80:560729:570896:-1 gene:ENSCPOG00000010512 transcript:ENSCPOT00000010607	K174	Acetylation	100% (23.31)	0.999978	0	0	0	0	0	0	0	0	0	0	0	0	0	0	0	0	0	0	0	0	0	0	2	0
ENSCPOP00000001717	pep:novel scaffold:cavPor3:scaffold_218:190762:197578:-1 gene:ENSCPOG00000001899 transcript:ENSCPOT00000001920	K292	Acetylation	100% (22.12)	0.999962	0	0	0	0	1	0	0	0	0	0	0	0	0	0	0	0	0	0	0	0	0	0	0	0
ENSCPOP00000013476	pep:novel scaffold:cavPor3:scaffold_18:26769680:26778031:-1 gene:ENSCPOG00000014953 transcript:ENSCPOT00000015099	K65	Acetylation	100% (47.14)	0.999961	0	0	0	0	0	0	0	0	0	0	0	2	0	0	0	0	0	0	0	1	0	0	0	0
ENSCPOP00000002148	pep:novel scaffold:cavPor3:scaffold_6:963339:978817:-1 gene:ENSCPOG00000002363 transcript:ENSCPOT00000002396	K137	Acetylation	100% (43.44)	0.999955	4	0	0	0	0	0	0	0	0	0	0	3	4	0	0	0	0	0	0	1	5	5	0	0
ENSCPOP00000003760	pep:novel scaffold:cavPor3:scaffold_19:25400692:25403895:1 gene:ENSCPOG00000004169 transcript:ENSCPOT00000004214	K597	Acetylation	100% (43.44)	0.999955	0	0	0	0	0	4	0	0	0	6	0	0	0	0	0	0	2	2	0	0	0	0	0	0
ENSCPOP00000011060	pep:novel scaffold:cavPor3:scaffold_25:5710930:5718340:1 gene:ENSCPOG00000012297 transcript:ENSCPOT00000012413	K53	Acetylation	100% (42.46)	0.999943	0	0	0	0	0	0	0	0	2	0	0	0	0	0	0	0	1	0	0	0	0	0	0	0
ENSCPOP00000016138	pep:novel scaffold:cavPor3:scaffold_70:264329:268759:1 gene:ENSCPOG00000020449 transcript:ENSCPOT00000021458	K175	Acetylation	100% (20.79)	0.999931	0	0	0	0	0	0	0	2	0	0	0	0	0	0	0	0	0	0	0	0	0	0	0	1
ENSCPOP00000004894	pep:novel scaffold:cavPor3:scaffold_28:24703957:24757470:1 gene:ENSCPOG00000005438 transcript:ENSCPOT00000005496	K1528	Acetylation	100% (29.88)	0.999918	0	0	7	0	18	4	10	4	12	9	0	6	0	0	0	0	3	4	0	5	4	19	0	4
ENSCPOP00000013483	pep:novel scaffold:cavPor3:scaffold_6:57908024:57954535:-1 gene:ENSCPOG00000014961 transcript:ENSCPOT00000015107	K338	Acetylation	100% (20.35)	0.999915	2	0	0	0	0	0	0	0	0	0	0	0	0	0	0	0	0	0	0	0	0	0	0	0
ENSCPOP00000013564	pep:novel scaffold:cavPor3:scaffold_136:798095:818006:1 gene:ENSCPOG00000015048 transcript:ENSCPOT00000015195	K257	Acetylation	100% (39.39)	0.999885	0	0	0	0	0	0	0	0	0	0	0	0	0	0	0	0	0	0	1	0	0	0	0	0
ENSCPOP00000016987	pep:novel scaffold:cavPor3:scaffold_104:3179479:3187399:1 gene:ENSCPOG00000002588 transcript:ENSCPOT00000002622	K364	Acetylation	100% (38.84)	0.999869	4	0	0	0	0	0	0	0	0	0	0	0	0	0	0	0	0	1	0	0	0	0	0	0
ENSCPOP00000002148	pep:novel scaffold:cavPor3:scaffold_6:963339:978817:-1 gene:ENSCPOG00000002363 transcript:ENSCPOT00000002396	K290	Acetylation	100% (19.20)	0.999856	0	0	0	0	0	0	0	0	0	0	0	0	1	0	0	0	0	0	0	0	0	0	0	0
ENSCPOP00000002972	pep:novel scaffold:cavPor3:scaffold_7:3441640:3460244:-1 gene:ENSCPOG00000003289 transcript:ENSCPOT00000003332	K78	Acetylation	100% (38.17)	0.999847	0	0	0	0	1	0	0	0	0	0	0	0	0	0	0	0	0	0	0	0	0	0	0	0
ENSCPOP00000011673	pep:novel scaffold:cavPor3:scaffold_29:14939013:15052270:1 gene:ENSCPOG00000012966 transcript:ENSCPOT00000013091	K480	Acetylation	100% (19.02)	0.999843	0	0	0	0	0	0	0	0	0	0	0	1	0	0	0	0	0	0	0	0	0	0	0	0
ENSCPOP00000006354	pep:known scaffold:cavPor3:scaffold_13:17431200:17450183:1 gene:ENSCPOG00000007045 transcript:ENSCPOT00000007114	K968	Acetylation	100% (40.10)	0.999805	0	0	1	0	0	0	0	0	0	0	0	0	0	2	0	0	0	0	0	0	3	3	0	0
ENSCPOP00000011828	pep:novel scaffold:cavPor3:scaffold_61:10028635:10033077:1 gene:ENSCPOG00000013139 transcript:ENSCPOT00000013266	K89	Acetylation	100% (36.27)	0.999764	0	0	0	0	0	1	0	0	0	0	0	0	0	0	0	0	0	0	0	0	0	0	0	0
ENSCPOP00000002485	pep:novel scaffold:cavPor3:scaffold_5:24468474:24685345:-1 gene:ENSCPOG00000002735 transcript:ENSCPOT00000002770	K56	Acetylation	100% (17.96)	0.999744	11	0	20	0	4	2	0	0	0	6	0	6	12	0	0	0	0	1	0	10	14	8	0	0
ENSCPOP00000002782	pep:known scaffold:cavPor3:scaffold_47:631721:647024:-1 gene:ENSCPOG00000003072 transcript:ENSCPOT00000003114	K580	Acetylation	100% (17.96)	0.999744	0	0	0	0	1	0	0	0	2	0	0	0	0	0	0	0	0	0	0	0	0	0	0	0
ENSCPOP00000003038	pep:novel scaffold:cavPor3:scaffold_66:2440059:2494038:-1 gene:ENSCPOG00000003361 transcript:ENSCPOT00000003404	K401	Acetylation	100% (17.96)	0.999744	0	0	0	0	0	0	0	0	0	0	3	3	0	0	0	0	0	1	0	2	0	0	0	0
ENSCPOP00000004119	pep:novel scaffold:cavPor3:scaffold_7:35044434:35064153:1 gene:ENSCPOG00000004569 transcript:ENSCPOT00000004618	K284	Acetylation	100% (17.96)	0.999744	0	0	0	0	0	0	0	0	0	0	0	0	0	0	0	0	0	0	0	0	1	0	0	0
ENSCPOP00000006354	pep:known scaffold:cavPor3:scaffold_13:17431200:17450183:1 gene:ENSCPOG00000007045 transcript:ENSCPOT00000007114	K1106	Acetylation	100% (17.96)	0.999744	0	0	0	0	0	0	0	0	0	0	0	0	1	0	0	0	0	0	0	0	2	2	0	0
ENSCPOP00000007975	pep:novel scaffold:cavPor3:scaffold_3:2177436:2208713:1 gene:ENSCPOG00000008879 transcript:ENSCPOT00000008959	K300	Acetylation	100% (17.96)	0.999744	2	0	2	0	0	0	0	0	0	0	0	0	0	0	0	0	0	0	0	0	0	0	0	0
ENSCPOP00000008332	pep:novel scaffold:cavPor3:scaffold_59:2045699:2060270:1 gene:ENSCPOG00000009280 transcript:ENSCPOT00000009365	K39	Acetylation	100% (17.96)	0.999744	3	0	0	2	0	0	0	0	0	0	0	0	3	0	0	0	0	0	0	0	0	4	0	0
ENSCPOP00000011810	pep:novel scaffold:cavPor3:scaffold_6:17231705:17263534:1 gene:ENSCPOG00000013120 transcript:ENSCPOT00000013247	K361	Acetylation	100% (17.96)	0.999744	0	0	0	0	0	0	0	0	0	0	1	0	0	0	0	0	0	0	0	0	0	2	0	0
ENSCPOP00000014862	pep:novel scaffold:cavPor3:scaffold_61:9395190:9400078:-1 gene:ENSCPOG00000020114 transcript:ENSCPOT00000020475	K297	Acetylation	100% (17.96)	0.999744	1	0	0	0	0	0	0	0	0	0	0	4	0	0	0	0	0	0	0	0	0	0	0	0
ENSCPOP00000015130	pep:novel scaffold:cavPor3:scaffold_108:1665430:1665810:1 gene:ENSCPOG00000022212 transcript:ENSCPOT00000022288	K24	Acetylation	100% (17.96)	0.999744	6	0	18	0	0	0	0	0	0	0	0	3	5	0	0	0	0	0	0	1	8	7	0	0
ENSCPOP00000016987	pep:novel scaffold:cavPor3:scaffold_104:3179479:3187399:1 gene:ENSCPOG00000002588 transcript:ENSCPOT00000002622	K191	Acetylation	100% (17.96)	0.999744	1	0	0	0	0	0	0	0	0	0	0	0	0	0	0	0	0	0	1	0	0	0	0	0
ENSCPOP00000016987	pep:novel scaffold:cavPor3:scaffold_104:3179479:3187399:1 gene:ENSCPOG00000002588 transcript:ENSCPOT00000002622	K249	Acetylation	100% (17.96)	0.999744	0	0	0	0	0	0	0	0	0	0	0	0	1	0	0	0	0	0	0	0	0	2	0	0
ENSCPOP00000011074	pep:novel scaffold:cavPor3:scaffold_107:589423:596421:1 gene:ENSCPOG00000012311 transcript:ENSCPOT00000012428	K129	Acetylation	100% (17.96)	0.999742	0	0	5	0	0	0	0	0	0	0	0	0	3	2	0	0	0	0	0	0	6	9	0	0
ENSCPOP00000017103	pep:known scaffold:cavPor3:scaffold_60:10525123:10534088:1 gene:ENSCPOG00000000378 transcript:ENSCPOT00000026680	K127	Acetylation	100% (35.81)	0.999738	0	0	6	0	0	1	0	0	0	0	0	0	3	0	0	0	0	0	0	0	4	0	0	0
ENSCPOP00000004266	pep:novel scaffold:cavPor3:scaffold_14:15735485:15768669:1 gene:ENSCPOG00000004734 transcript:ENSCPOT00000004784	K240	Acetylation	100% (17.86)	0.999732	0	0	0	0	0	0	0	0	0	0	0	1	0	0	0	0	0	0	0	0	0	0	0	0
ENSCPOP00000015130	pep:novel scaffold:cavPor3:scaffold_108:1665430:1665810:1 gene:ENSCPOG00000022212 transcript:ENSCPOT00000022288	K117	Acetylation	100% (26.96)	0.999724	0	0	0	0	0	0	0	0	0	0	0	0	1	0	0	0	0	0	0	0	0	0	0	0
ENSCPOP00000016731	pep:novel scaffold:cavPor3:scaffold_2:10917407:10917787:-1 gene:ENSCPOG00000020265 transcript:ENSCPOT00000025200	K117	Acetylation	100% (26.96)	0.999724	0	0	0	0	0	0	0	0	0	0	0	0	1	0	0	0	0	0	0	0	0	0	0	0
ENSCPOP00000003526	pep:novel scaffold:cavPor3:scaffold_3:11859161:11992100:1 gene:ENSCPOG00000003907 transcript:ENSCPOT00000003951	K1333	Acetylation	100% (35.08)	0.999689	0	0	0	0	0	0	0	0	0	0	0	0	1	0	0	0	0	0	0	0	0	2	0	0
ENSCPOP00000003628	pep:novel scaffold:cavPor3:scaffold_76:181419:184289:1 gene:ENSCPOG00000004022 transcript:ENSCPOT00000004066	K94	Acetylation	100% (35.03)	0.999686	2	0	0	0	0	0	0	0	0	0	2	0	0	0	0	0	0	0	0	0	0	1	0	0
ENSCPOP00000002733	pep:novel scaffold:cavPor3:scaffold_37:5976417:6004088:1 gene:ENSCPOG00000003017 transcript:ENSCPOT00000003056	K105	Acetylation	100% (34.49)	0.999644	6	0	12	0	0	1	0	0	0	0	0	3	0	0	0	0	0	0	0	0	10	0	0	0
ENSCPOP00000003559	pep:novel scaffold:cavPor3:scaffold_1:22436542:22446404:-1 gene:ENSCPOG00000003941 transcript:ENSCPOT00000003985	K403	Acetylation	100% (33.45)	0.999548	3	0	4	0	0	0	2	0	0	0	0	0	0	0	0	0	0	0	2	0	0	0	0	0
ENSCPOP00000006024	pep:novel scaffold:cavPor3:scaffold_4:38435711:38461669:1 gene:ENSCPOG00000006687 transcript:ENSCPOT00000006755	K250	Acetylation	100% (16.47)	0.999493	0	0	0	0	0	0	0	0	0	0	0	0	0	0	0	0	0	0	1	0	0	0	0	0
ENSCPOP00000006354	pep:known scaffold:cavPor3:scaffold_13:17431200:17450183:1 gene:ENSCPOG00000007045 transcript:ENSCPOT00000007114	K1324	Acetylation	100% (16.47)	0.999493	0	0	0	0	0	0	0	0	0	0	0	0	1	0	0	0	0	0	0	0	0	0	0	0
ENSCPOP00000014751	pep:novel scaffold:cavPor3:scaffold_3:11929130:11992796:1 gene:ENSCPOG00000003907 transcript:ENSCPOT00000022569	K14736	Acetylation	100% (32.36)	0.999419	0	0	2	0	0	0	0	0	0	0	0	0	0	2	0	0	0	0	0	0	3	3	0	0
ENSCPOP00000006188	pep:novel scaffold:cavPor3:scaffold_140:2258615:2264853:-1 gene:ENSCPOG00000006864 transcript:ENSCPOT00000006933	K63	Acetylation	100% (15.92)	0.999345	0	0	0	0	0	0	0	0	0	0	0	0	0	0	0	0	0	1	0	0	0	0	0	0
ENSCPOP00000004382	pep:known scaffold:cavPor3:scaffold_85:1756656:1785432:-1 gene:ENSCPOG00000004869 transcript:ENSCPOT00000004921	K251	Acetylation	100% (15.66)	0.999263	0	0	0	0	4	0	0	0	0	0	0	0	0	0	0	0	0	0	0	0	0	0	0	0
ENSCPOP00000009090	pep:novel scaffold:cavPor3:scaffold_13:23919831:23958033:1 gene:ENSCPOG00000010123 transcript:ENSCPOT00000010214	K228	Acetylation	100% (34.24)	0.999247	0	0	0	0	0	0	0	0	0	0	0	0	0	2	0	0	0	0	0	0	0	0	0	0
ENSCPOP00000010265	pep:novel scaffold:cavPor3:scaffold_90:789763:796018:1 gene:ENSCPOG00000011419 transcript:ENSCPOT00000011525	K169	Acetylation	100% (30.62)	0.999132	10	0	0	0	6	0	0	0	3	0	0	0	0	0	0	0	3	0	0	4	0	6	0	0
ENSCPOP00000003628	pep:novel scaffold:cavPor3:scaffold_76:181419:184289:1 gene:ENSCPOG00000004022 transcript:ENSCPOT00000004066	K67	Acetylation	100% (14.98)	0.998993	24	6	32	16	3	0	9	0	0	0	7	7	9	18	4	4	0	0	5	5	10	22	2	0
ENSCPOP00000005365	pep:novel scaffold:cavPor3:scaffold_18:8112613:8154587:-1 gene:ENSCPOG00000005945 transcript:ENSCPOT00000006008	K569	Acetylation	100% (14.98)	0.998993	4	0	0	0	0	0	0	0	0	0	3	0	0	0	0	1	0	0	0	0	0	0	0	0
ENSCPOP00000008101	pep:novel scaffold:cavPor3:scaffold_5:61120435:61133739:-1 gene:ENSCPOG00000009020 transcript:ENSCPOT00000009103	K135	Acetylation	100% (14.98)	0.998993	0	0	0	0	0	1	0	0	0	0	0	0	0	0	0	0	0	0	0	0	0	0	0	0
ENSCPOP00000008228	pep:novel scaffold:cavPor3:scaffold_22:23562397:23583692:1 gene:ENSCPOG00000009164 transcript:ENSCPOT00000009247	K365	Acetylation	100% (14.98)	0.998993	20	0	14	7	6	2	0	0	0	3	6	6	8	8	0	0	1	1	4	4	0	0	0	0
ENSCPOP00000011443	pep:novel scaffold:cavPor3:scaffold_14:19065414:19075174:1 gene:ENSCPOG00000012719 transcript:ENSCPOT00000012841	K237	Acetylation	100% (14.98)	0.998993	1	0	0	0	0	0	0	0	0	0	4	0	0	0	0	1	0	0	0	0	0	0	0	0
ENSCPOP00000011828	pep:novel scaffold:cavPor3:scaffold_61:10028635:10033077:1 gene:ENSCPOG00000013139 transcript:ENSCPOT00000013266	K80	Acetylation	100% (14.98)	0.998993	0	0	0	0	1	1	0	0	0	0	0	0	0	0	0	0	0	0	0	0	0	0	0	0
ENSCPOP00000012084	pep:novel scaffold:cavPor3:scaffold_16:19620624:19831690:-1 gene:ENSCPOG00000013421 transcript:ENSCPOT00000013553	K198	Acetylation	100% (14.98)	0.998993	6	0	0	0	4	0	0	0	0	0	0	0	0	0	0	0	1	1	0	0	0	0	0	0
ENSCPOP00000013483	pep:novel scaffold:cavPor3:scaffold_6:57908024:57954535:-1 gene:ENSCPOG00000014961 transcript:ENSCPOT00000015107	K58	Acetylation	100% (14.98)	0.998993	3	0	0	0	0	0	0	0	2	2	0	0	0	4	0	0	1	0	0	0	0	0	0	0
ENSCPOP00000016138	pep:novel scaffold:cavPor3:scaffold_70:264329:268759:1 gene:ENSCPOG00000020449 transcript:ENSCPOT00000021458	K37	Acetylation	100% (14.98)	0.998993	0	0	0	0	0	0	2	0	0	0	0	0	0	0	0	0	0	0	0	0	0	0	0	1
ENSCPOP00000006354	pep:known scaffold:cavPor3:scaffold_13:17431200:17450183:1 gene:ENSCPOG00000007045 transcript:ENSCPOT00000007114	K939	Acetylation	100% (14.95)	0.998977	0	0	0	0	0	0	0	0	0	0	0	0	0	2	0	0	0	0	0	1	0	3	0	0
ENSCPOP00000010730	pep:novel scaffold:cavPor3:scaffold_21:15123631:15146990:1 gene:ENSCPOG00000011927 transcript:ENSCPOT00000012042	K190	Acetylation	100% (14.95)	0.998977	0	0	0	0	0	2	0	0	0	0	0	0	0	0	0	0	1	0	3	0	4	0	0	0
ENSCPOP00000011828	pep:novel scaffold:cavPor3:scaffold_61:10028635:10033077:1 gene:ENSCPOG00000013139 transcript:ENSCPOT00000013266	K193	Acetylation	100% (14.87)	0.998938	0	0	0	0	1	1	0	0	0	0	0	0	0	0	0	0	0	0	0	0	0	0	0	0
ENSCPOP00000005809	pep:novel scaffold:cavPor3:scaffold_16:18485099:18539975:1 gene:ENSCPOG00000006449 transcript:ENSCPOT00000006514	K41	Acetylation	100% (14.44)	0.998708	0	0	0	0	0	0	0	0	1	0	0	0	0	0	0	0	0	0	0	0	0	0	0	0
ENSCPOP00000006354	pep:known scaffold:cavPor3:scaffold_13:17431200:17450183:1 gene:ENSCPOG00000007045 transcript:ENSCPOT00000007114	K744	Acetylation	100% (28.67)	0.998643	0	0	7	0	0	0	0	0	0	0	0	0	0	2	0	0	0	0	0	0	3	3	0	0
ENSCPOP00000001264	pep:novel scaffold:cavPor3:scaffold_115:2986760:3023270:1 gene:ENSCPOG00000001399 transcript:ENSCPOT00000001418	K1055	Acetylation	100% (14.29)	0.998613	0	1	0	0	0	0	0	0	0	0	0	0	0	0	0	0	0	0	0	0	0	0	0	0
ENSCPOP00000006558	pep:novel scaffold:cavPor3:scaffold_10:15096255:15116972:-1 gene:ENSCPOG00000007279 transcript:ENSCPOT00000007351	K218	Acetylation	100% (27.94)	0.998394	0	0	0	0	0	0	0	0	0	0	0	0	0	0	0	0	1	1	0	0	0	0	0	0
ENSCPOP00000009794	pep:novel scaffold:cavPor3:scaffold_98:1033898:1057934:1 gene:ENSCPOG00000010901 transcript:ENSCPOT00000011002	K217	Acetylation	100% (27.94)	0.998394	0	0	0	0	4	0	0	0	0	3	0	0	0	0	0	0	1	1	0	0	0	0	0	0
ENSCPOP00000002733	pep:novel scaffold:cavPor3:scaffold_37:5976417:6004088:1 gene:ENSCPOG00000003017 transcript:ENSCPOT00000003056	K192	Acetylation	100% (13.47)	0.997983	0	0	0	0	0	0	0	0	0	1	0	3	0	0	0	0	0	0	0	2	0	0	0	0
ENSCPOP00000008228	pep:novel scaffold:cavPor3:scaffold_22:23562397:23583692:1 gene:ENSCPOG00000009164 transcript:ENSCPOT00000009247	K107	Acetylation	100% (26.82)	0.99792	0	0	0	0	0	0	0	0	0	0	0	0	0	0	0	0	0	0	0	0	0	1	0	0
ENSCPOP00000008014	pep:novel scaffold:cavPor3:scaffold_150:1970861:1992859:-1 gene:ENSCPOG00000008921 transcript:ENSCPOT00000009001	K618	Acetylation	100% (26.40)	0.997708	9	0	0	0	0	0	3	0	0	0	0	4	0	0	0	0	0	0	2	0	0	0	0	0
ENSCPOP00000011810	pep:novel scaffold:cavPor3:scaffold_6:17231705:17263534:1 gene:ENSCPOG00000013120 transcript:ENSCPOT00000013247	K65	Acetylation	100% (13.19)	0.997701	28	0	24	12	8	2	0	0	0	0	5	0	0	0	0	0	1	1	3	0	7	7	0	0
ENSCPOP00000005365	pep:novel scaffold:cavPor3:scaffold_18:8112613:8154587:-1 gene:ENSCPOG00000005945 transcript:ENSCPOT00000006008	K570	Acetylation	100% (12.97)	0.997464	0	0	0	0	0	0	0	0	0	0	0	4	0	0	0	0	0	0	1	0	0	0	0	0
ENSCPOP00000006354	pep:known scaffold:cavPor3:scaffold_13:17431200:17450183:1 gene:ENSCPOG00000007045 transcript:ENSCPOT00000007114	K1531	Acetylation	100% (18.65)	0.99739	0	0	28	8	0	0	1	0	0	0	0	3	5	5	0	0	0	0	2	0	6	12	0	0
ENSCPOP00000013810	pep:known scaffold:cavPor3:scaffold_12:21062483:21074010:1 gene:ENSCPOG00000015324 transcript:ENSCPOT00000015473	K70	Acetylation	100% (12.09)	0.996195	0	0	0	0	6	2	0	0	0	3	0	0	0	0	0	0	1	1	0	0	0	0	0	0
ENSCPOP00000011443	pep:novel scaffold:cavPor3:scaffold_14:19065414:19075174:1 gene:ENSCPOG00000012719 transcript:ENSCPOT00000012841	K236	Acetylation	100% (18.41)	0.99605	22	0	27	0	1	0	2	0	0	0	6	0	8	0	3	4	0	0	4	1	0	0	0	0
ENSCPOP00000011674	pep:novel scaffold:cavPor3:scaffold_80:3647536:3647862:-1 gene:ENSCPOG00000012967 transcript:ENSCPOT00000013092	K104	Acetylation	100% (12.01)	0.99605	0	0	5	0	0	0	0	0	0	0	0	1	2	7	0	0	0	0	0	0	4	7	0	0
ENSCPOP00000004894	pep:novel scaffold:cavPor3:scaffold_28:24703957:24757470:1 gene:ENSCPOG00000005438 transcript:ENSCPOT00000005496	K1529	Acetylation	100% (12.01)	0.995496	0	0	2	0	12	2	0	0	3	3	0	0	0	0	0	0	1	1	0	0	5	10	0	0
ENSCPOP00000016138	pep:novel scaffold:cavPor3:scaffold_70:264329:268759:1 gene:ENSCPOG00000020449 transcript:ENSCPOT00000021458	K178	Acetylation	99% (22.30)	0.994115	0	0	0	0	0	0	3	0	0	0	0	0	0	0	0	0	0	0	0	0	0	0	0	0
ENSCPOP00000013280	pep:novel scaffold:cavPor3:scaffold_45:1187560:1200928:-1 gene:ENSCPOG00000014740 transcript:ENSCPOT00000014885	K43	Acetylation	99% (11.12)	0.994062	0	0	0	0	0	1	0	0	0	0	0	0	0	0	0	0	0	0	0	0	0	0	0	0
ENSCPOP00000012030	pep:novel scaffold:cavPor3:scaffold_115:3032722:3062306:1 gene:ENSCPOG00000013363 transcript:ENSCPOT00000013494	K372	Acetylation	99% (10.97)	0.993641	0	0	0	0	0	0	0	0	0	0	2	0	0	0	0	0	0	0	0	0	0	0	0	0
ENSCPOP00000009450	pep:novel scaffold:cavPor3:scaffold_16:15526444:15534756:-1 gene:ENSCPOG00000010523 transcript:ENSCPOT00000010618	K60	Acetylation	99% (20.68)	0.991444	0	0	0	0	0	0	0	0	0	0	0	0	0	0	0	0	0	0	0	0	0	1	0	0
ENSCPOP00000002239	pep:novel scaffold:cavPor3:scaffold_89:5793790:5800034:-1 gene:ENSCPOG00000002458 transcript:ENSCPOT00000002491	K242	Acetylation	99% (10.32)	0.991432	0	0	0	0	0	0	0	0	0	0	0	0	0	0	0	0	0	0	0	0	1	1	0	0
ENSCPOP00000006354	pep:known scaffold:cavPor3:scaffold_13:17431200:17450183:1 gene:ENSCPOG00000007045 transcript:ENSCPOT00000007114	K1444	Acetylation	99% (10.28)	0.991298	0	0	12	3	0	0	0	0	0	0	0	2	4	4	0	0	0	0	0	1	5	0	0	0
ENSCPOP00000000235	pep:known scaffold:cavPor3:scaffold_4:20169103:20169845:1 gene:ENSCPOG00000000267 transcript:ENSCPOT00000000270	K41	Acetylation	99% (10.05)	0.990309	0	0	0	0	1	0	0	0	0	0	0	0	0	0	0	0	0	0	0	0	0	0	0	0
ENSCPOP00000002782	pep:known scaffold:cavPor3:scaffold_47:631721:647024:-1 gene:ENSCPOG00000003072 transcript:ENSCPOT00000003114	K300	Acetylation	99% (9.72)	0.98873	0	0	0	0	0	0	0	0	0	1	0	0	0	0	0	0	0	0	0	0	0	0	0	0
ENSCPOP00000004877	pep:novel scaffold:cavPor3:scaffold_18:8160066:8185370:1 gene:ENSCPOG00000005418 transcript:ENSCPOT00000005476	K299	Acetylation	99% (18.85)	0.986984	4	0	0	0	0	0	0	0	0	0	0	0	0	0	0	0	0	0	0	0	0	0	0	0
ENSCPOP00000006354	pep:known scaffold:cavPor3:scaffold_13:17431200:17450183:1 gene:ENSCPOG00000007045 transcript:ENSCPOT00000007114	K1727	Acetylation	98% (9.07)	0.98488	0	0	0	0	0	0	0	0	0	0	0	0	0	0	0	0	0	0	0	0	2	0	0	0
ENSCPOP00000012084	pep:novel scaffold:cavPor3:scaffold_16:19620624:19831690:-1 gene:ENSCPOG00000013421 transcript:ENSCPOT00000013553	K251	Acetylation	98% (12.37)	0.975234	0	0	0	0	0	0	0	0	0	0	0	0	0	0	0	0	0	0	0	0	1	0	0	0
ENSCPOP00000009450	pep:novel scaffold:cavPor3:scaffold_16:15526444:15534756:-1 gene:ENSCPOG00000010523 transcript:ENSCPOT00000010618	K69	Acetylation	97% (18.88)	0.974585	0	0	0	0	0	0	2	1	0	0	3	0	0	0	0	0	0	0	2	0	0	0	0	0
ENSCPOP00000006603	pep:novel scaffold:cavPor3:scaffold_51:11246067:11253138:-1 gene:ENSCPOG00000007325 transcript:ENSCPOT00000007397	K150	Acetylation	97% (10.33)	0.973667	0	0	0	0	0	0	0	0	0	0	0	0	0	0	0	0	0	0	0	0	2	0	0	0
ENSCPOP00000010922	pep:novel scaffold:cavPor3:scaffold_0:19470918:19475074:1 gene:ENSCPOG00000012149 transcript:ENSCPOT00000012265	K83	Acetylation	97% (15.48)	0.971687	0	0	0	0	0	0	0	0	0	0	0	0	0	0	0	0	0	0	0	0	1	0	0	0
ENSCPOP00000013208	pep:novel scaffold:cavPor3:scaffold_25:8153707:8155747:-1 gene:ENSCPOG00000014658 transcript:ENSCPOT00000014803	K83	Acetylation	97% (7.51)	0.96953	0	0	0	0	0	0	0	0	0	0	0	0	0	0	0	0	0	0	0	0	1	1	0	0
ENSCPOP00000001378	pep:known scaffold:cavPor3:scaffold_71:5337899:5339176:1 gene:ENSCPOG00000001523 transcript:ENSCPOT00000001543	K62	Acetylation	97% (7.51)	0.969422	0	0	0	0	0	0	0	0	0	2	0	0	0	0	0	0	0	0	0	0	0	0	0	0
ENSCPOP00000004744	pep:novel scaffold:cavPor3:scaffold_36:9147038:9150518:-1 gene:ENSCPOG00000005275 transcript:ENSCPOT00000005332	K94	Acetylation	97% (7.45)	0.968626	1	0	0	3	0	0	0	0	0	0	0	4	0	0	0	0	0	0	0	0	4	0	0	0
ENSCPOP00000006354	pep:known scaffold:cavPor3:scaffold_13:17431200:17450183:1 gene:ENSCPOG00000007045 transcript:ENSCPOT00000007114	K1042	Acetylation	97% (14.98)	0.968287	0	0	5	0	0	0	0	0	0	0	0	0	3	4	0	0	0	0	0	0	6	0	0	0
ENSCPOP00000014751	pep:novel scaffold:cavPor3:scaffold_3:11929130:11992796:1 gene:ENSCPOG00000003907 transcript:ENSCPOT00000022569	K13934	Acetylation	96% (19.37)	0.963497	0	0	1	0	0	0	0	0	0	0	0	0	0	0	0	0	0	0	0	0	0	0	0	0
ENSCPOP00000002782	pep:known scaffold:cavPor3:scaffold_47:631721:647024:-1 gene:ENSCPOG00000003072 transcript:ENSCPOT00000003114	K298	Acetylation	93% (5.50)	0.926538	0	0	0	0	0	1	0	0	0	0	0	0	0	0	0	0	0	0	0	0	0	0	0	0
ENSCPOP00000011409	pep:novel scaffold:cavPor3:scaffold_43:5607266:5658730:-1 gene:ENSCPOG00000012683 transcript:ENSCPOT00000012804	K171	Acetylation	91% (10.52)	0.912015	0	0	0	0	0	0	0	0	0	0	0	0	0	0	0	0	1	0	0	0	0	0	0	0
ENSCPOP00000016987	pep:novel scaffold:cavPor3:scaffold_104:3179479:3187399:1 gene:ENSCPOG00000002588 transcript:ENSCPOT00000002622	K387	Acetylation	91% (6.40)	0.905458	1	0	2	0	0	0	0	0	0	0	0	0	0	0	0	0	0	0	0	0	3	0	0	0
ENSCPOP00000000366	pep:novel scaffold:cavPor3:scaffold_3:60137952:60141698:1 gene:ENSCPOG00000000415 transcript:ENSCPOT00000000418	K48	Acetylation	90% (4.67)	0.895876	0	0	0	0	0	2	0	0	3	0	0	0	0	0	0	0	1	1	0	0	0	0	0	0
ENSCPOP00000012030	pep:novel scaffold:cavPor3:scaffold_115:3032722:3062306:1 gene:ENSCPOG00000013363 transcript:ENSCPOT00000013494	K82	Acetylation	89% (9.89)	0.89349	0	0	1	0	0	0	0	0	0	0	0	0	0	0	0	0	0	0	0	0	0	0	0	0
ENSCPOP00000013280	pep:novel scaffold:cavPor3:scaffold_45:1187560:1200928:-1 gene:ENSCPOG00000014740 transcript:ENSCPOT00000014885	K170	Acetylation	89% (4.62)	0.88695	0	0	0	0	0	0	0	0	0	1	0	0	0	0	0	0	0	0	0	0	0	0	0	0
ENSCPOP00000014862	pep:novel scaffold:cavPor3:scaffold_61:9395190:9400078:-1 gene:ENSCPOG00000020114 transcript:ENSCPOT00000020475	K298	Acetylation	88% (4.29)	0.877991	1	0	0	0	0	0	0	0	0	0	0	0	0	0	0	0	0	0	0	0	0	0	0	0
ENSCPOP00000005002	pep:novel scaffold:cavPor3:scaffold_13:39857037:39884518:-1 gene:ENSCPOG00000005555 transcript:ENSCPOT00000005614	K468	Acetylation	88% (4.27)	0.877053	2	0	0	0	0	0	0	0	0	0	0	0	0	0	0	0	0	0	1	0	0	0	0	0
ENSCPOP00000013280	pep:novel scaffold:cavPor3:scaffold_45:1187560:1200928:-1 gene:ENSCPOG00000014740 transcript:ENSCPOT00000014885	K166	Acetylation	88% (4.25)	0.876253	0	0	0	0	0	2	0	0	0	0	0	0	0	0	0	0	0	1	0	0	0	0	0	0
ENSCPOP00000011409	pep:novel scaffold:cavPor3:scaffold_43:5607266:5658730:-1 gene:ENSCPOG00000012683 transcript:ENSCPOT00000012804	K173	Acetylation	84% (7.88)	0.840638	0	0	0	0	0	0	0	0	0	0	0	0	0	0	0	0	0	0	0	0	1	0	0	0
ENSCPOP00000003760	pep:novel scaffold:cavPor3:scaffold_19:25400692:25403895:1 gene:ENSCPOG00000004169 transcript:ENSCPOT00000004214	K583	Acetylation	84% (7.81)	0.838333	0	0	0	0	1	0	0	0	0	0	0	0	0	0	0	0	0	0	0	0	0	0	0	0
ENSCPOP00000009450	pep:novel scaffold:cavPor3:scaffold_16:15526444:15534756:-1 gene:ENSCPOG00000010523 transcript:ENSCPOT00000010618	K71	Acetylation	84% (10.32)	0.837126	2	0	6	3	0	0	1	0	0	0	0	0	0	4	0	0	0	0	0	0	5	5	0	0
ENSCPOP00000016987	pep:novel scaffold:cavPor3:scaffold_104:3179479:3187399:1 gene:ENSCPOG00000002588 transcript:ENSCPOT00000002622	K192	Acetylation	84% (10.32)	0.837126	2	0	4	0	0	0	0	0	0	0	0	0	0	0	0	0	0	0	0	0	1	0	0	0
ENSCPOP00000013152	pep:novel scaffold:cavPor3:scaffold_21:24549965:24560266:1 gene:ENSCPOG00000014597 transcript:ENSCPOT00000014742	K97	Acetylation	82% (7.45)	0.824834	0	0	0	0	1	0	0	0	0	0	0	0	0	0	0	0	0	0	0	0	0	0	0	0
ENSCPOP00000018791	pep:novel scaffold:cavPor3:scaffold_309:283778:287163:1 gene:ENSCPOG00000022243 transcript:ENSCPOT00000019606	K67	Acetylation	82% (7.28)	0.818255	1	0	4	0	0	0	0	0	0	0	0	0	0	0	0	0	0	0	0	0	0	0	0	0
ENSCPOP00000005365	pep:novel scaffold:cavPor3:scaffold_18:8112613:8154587:-1 gene:ENSCPOG00000005945 transcript:ENSCPOT00000006008	K309	Acetylation	81% (3.14)	0.809605	0	1	0	0	0	0	0	0	0	0	0	0	0	0	0	0	0	0	0	0	0	0	0	0
ENSCPOP00000016471	pep:novel scaffold:cavPor3:scaffold_80:5809338:5818944:-1 gene:ENSCPOG00000019609 transcript:ENSCPOT00000025445	K369	Acetylation	80% (6.92)	0.80354	0	0	0	0	0	0	0	0	0	2	0	0	0	0	0	0	0	1	0	0	0	0	0	0
ENSCPOP00000003628	pep:novel scaffold:cavPor3:scaffold_76:181419:184289:1 gene:ENSCPOG00000004022 transcript:ENSCPOT00000004066	K143	Acetylation	80% (6.75)	0.796071	0	0	0	0	0	0	0	0	0	0	0	0	0	0	0	0	0	0	0	0	1	1	0	0
ENSCPOP00000009450	pep:novel scaffold:cavPor3:scaffold_16:15526444:15534756:-1 gene:ENSCPOG00000010523 transcript:ENSCPOT00000010618	K70	Acetylation	79% (9.11)	0.793226	2	0	0	0	0	0	0	0	0	0	0	1	0	0	0	0	0	0	0	0	0	0	0	0
ENSCPOP00000006558	pep:novel scaffold:cavPor3:scaffold_10:15096255:15116972:-1 gene:ENSCPOG00000007279 transcript:ENSCPOT00000007351	K221	Acetylation	76% (6.04)	0.763053	0	0	0	0	0	0	0	0	0	0	0	0	0	0	0	0	1	1	0	0	0	0	0	0
ENSCPOP00000005002	pep:novel scaffold:cavPor3:scaffold_13:39857037:39884518:-1 gene:ENSCPOG00000005555 transcript:ENSCPOT00000005614	K471	Acetylation	73% (2.12)	0.726631	1	0	0	0	0	0	0	0	0	0	0	0	0	0	0	0	0	0	0	0	0	0	0	0
ENSCPOP00000007630	pep:novel scaffold:cavPor3:scaffold_10:34101089:34115102:1 gene:ENSCPOG00000008488 transcript:ENSCPOT00000008565	K205	Acetylation	70% (7.02)	0.69667	5	0	0	0	1	0	0	0	2	0	5	0	0	0	3	0	0	0	0	0	2	0	0	0
ENSCPOP00000011373	pep:novel scaffold:cavPor3:scaffold_28:25045513:25081094:1 gene:ENSCPOG00000012642 transcript:ENSCPOT00000012763	K57	Acetylation	63% (7.09)	0.626967	0	0	0	0	0	0	0	0	0	0	0	0	1	0	0	0	0	0	0	0	0	0	0	0
ENSCPOP00000018791	pep:novel scaffold:cavPor3:scaffold_309:283778:287163:1 gene:ENSCPOG00000022243 transcript:ENSCPOT00000019606	K85	Acetylation	58% (6.40)	0.575176	0	0	0	0	0	0	0	0	0	0	0	0	0	0	0	0	0	0	0	0	1	0	0	0
ENSCPOP00000000631	pep:novel scaffold:cavPor3:scaffold_146:2060215:2070177:1 gene:ENSCPOG00000000710 transcript:ENSCPOT00000000715	K73	Acetylation	54% (2.61)	0.541146	0	0	1	0	0	0	0	0	0	0	0	0	0	0	0	0	0	0	0	0	0	0	0	0
ENSCPOP00000002046	pep:novel scaffold:cavPor3:scaffold_29:13436911:13515990:-1 gene:ENSCPOG00000002255 transcript:ENSCPOT00000002287	K169	Acetylation	50% (0.00)	0.5	2	0	4	0	0	0	0	0	0	0	0	0	0	0	0	0	0	0	0	0	3	6	0	0
ENSCPOP00000002485	pep:novel scaffold:cavPor3:scaffold_5:24468474:24685345:-1 gene:ENSCPOG00000002735 transcript:ENSCPOT00000002770	K57	Acetylation	50% (0.00)	0.5	8	0	0	6	2	2	0	0	0	3	0	5	0	0	0	0	0	1	0	0	0	7	0	0
ENSCPOP00000005365	pep:novel scaffold:cavPor3:scaffold_18:8112613:8154587:-1 gene:ENSCPOG00000005945 transcript:ENSCPOT00000006008	K351	Acetylation	50% (0.00)	0.5	5	0	0	0	0	0	0	0	0	0	3	3	0	0	0	0	0	0	1	1	0	0	0	0
ENSCPOP00000005809	pep:novel scaffold:cavPor3:scaffold_16:18485099:18539975:1 gene:ENSCPOG00000006449 transcript:ENSCPOT00000006514	K44	Acetylation	50% (0.00)	0.5	0	0	0	0	6	0	0	0	0	0	0	0	0	0	0	0	1	0	0	0	0	0	0	0
ENSCPOP00000008361	pep:novel scaffold:cavPor3:scaffold_20:18933903:18953714:1 gene:ENSCPOG00000009316 transcript:ENSCPOT00000009401	K274	Acetylation	50% (11.10)	0.5	4	0	5	0	1	2	0	0	0	2	0	5	0	0	6	0	1	0	4	0	0	6	0	0
ENSCPOP00000016987	pep:novel scaffold:cavPor3:scaffold_104:3179479:3187399:1 gene:ENSCPOG00000002588 transcript:ENSCPOT00000002622	K417	Acetylation	50% (0.00)	0.5	0	0	0	0	0	0	0	0	0	0	0	0	0	0	0	0	0	0	0	0	0	1	0	0
ENSCPOP00000016987	pep:novel scaffold:cavPor3:scaffold_104:3179479:3187399:1 gene:ENSCPOG00000002588 transcript:ENSCPOT00000002622	K250	Acetylation	50% (0.00)	0.5	2	0	0	0	0	0	0	0	0	0	0	0	0	0	0	0	0	0	0	0	0	0	0	0
ENSCPOP00000002782	pep:known scaffold:cavPor3:scaffold_47:631721:647024:-1 gene:ENSCPOG00000003072 transcript:ENSCPOT00000003114	K117	Acetylation	47% (1.17)	0.465386	0	0	0	0	1	0	0	0	0	0	0	0	0	0	0	0	0	0	0	0	0	0	0	0
ENSCPOP00000002122	pep:novel scaffold:cavPor3:scaffold_90:3691366:3697389:1 gene:ENSCPOG00000002336 transcript:ENSCPOT00000002368	K32	Acetylation	44% (9.95)	0.436193	0	0	0	0	0	0	0	0	0	0	0	0	0	0	0	0	0	0	0	0	1	0	0	0
ENSCPOP00000012030	pep:novel scaffold:cavPor3:scaffold_115:3032722:3062306:1 gene:ENSCPOG00000013363 transcript:ENSCPOT00000013494	K77	Acetylation	43% (4.95)	0.432481	0	0	0	0	2	0	0	0	0	0	0	0	0	0	0	0	0	0	0	0	4	0	0	0
ENSCPOP00000000235	pep:known scaffold:cavPor3:scaffold_4:20169103:20169845:1 gene:ENSCPOG00000000267 transcript:ENSCPOT00000000270	K61	Acetylation	43% (0.00)	0.431672	0	0	0	0	1	0	0	0	0	0	0	0	2	0	0	0	0	0	0	0	0	0	0	0
ENSCPOP00000011954	pep:novel scaffold:cavPor3:scaffold_53:7298438:7312532:-1 gene:ENSCPOG00000013278 transcript:ENSCPOT00000013407	K129	Acetylation	41% (10.28)	0.406771	2	0	4	4	0	0	0	0	0	0	3	0	0	0	0	0	0	0	1	0	0	0	0	0
ENSCPOP00000003559	pep:novel scaffold:cavPor3:scaffold_1:22436542:22446404:-1 gene:ENSCPOG00000003941 transcript:ENSCPOT00000003985	K137	Acetylation	38% (8.61)	0.379306	0	0	0	0	0	0	0	0	0	0	0	0	0	1	0	0	0	0	0	0	0	0	0	0
ENSCPOP00000008228	pep:novel scaffold:cavPor3:scaffold_22:23562397:23583692:1 gene:ENSCPOG00000009164 transcript:ENSCPOT00000009247	K82	Acetylation	37% (2.93)	0.36911	0	0	0	0	0	0	0	0	0	0	1	0	0	0	0	0	0	0	0	0	2	0	0	0
ENSCPOP00000012765	pep:novel scaffold:cavPor3:scaffold_35:15209255:15212535:-1 gene:ENSCPOG00000014169 transcript:ENSCPOT00000014311	K47	Acetylation	33% (0.26)	0.333728	0	0	0	0	1	0	0	0	0	2	0	0	0	0	0	0	0	0	0	0	0	0	0	0
ENSCPOP00000011074	pep:novel scaffold:cavPor3:scaffold_107:589423:596421:1 gene:ENSCPOG00000012311 transcript:ENSCPOT00000012428	K161	Acetylation	33% (0.00)	0.333372	0	0	0	0	0	0	0	0	0	0	0	0	0	1	0	0	0	0	0	0	0	2	0	0
ENSCPOP00000011674	pep:novel scaffold:cavPor3:scaffold_80:3647536:3647862:-1 gene:ENSCPOG00000012967 transcript:ENSCPOT00000013092	K106	Acetylation	33% (0.00)	0.333333	0	0	0	0	0	0	0	0	0	0	0	0	1	1	0	0	0	0	0	0	0	0	0	0
ENSCPOP00000001717	pep:novel scaffold:cavPor3:scaffold_218:190762:197578:-1 gene:ENSCPOG00000001899 transcript:ENSCPOT00000001920	K286	Acetylation	32% (11.24)	0.322718	0	0	0	0	1	0	0	0	0	0	0	0	0	0	0	0	0	0	0	0	0	0	0	0
ENSCPOP00000006354	pep:known scaffold:cavPor3:scaffold_13:17431200:17450183:1 gene:ENSCPOG00000007045 transcript:ENSCPOT00000007114	K405	Acetylation	28% (0.00)	0.280249	0	0	0	0	0	0	0	0	0	0	0	0	0	0	0	0	0	0	0	0	0	1	0	0
ENSCPOP00000006354	pep:known scaffold:cavPor3:scaffold_13:17431200:17450183:1 gene:ENSCPOG00000007045 transcript:ENSCPOT00000007114	K757	Acetylation	23% (3.54)	0.227013	0	0	0	0	0	0	0	0	0	0	0	0	0	0	0	0	0	0	0	0	1	0	0	0
ENSCPOP00000004877	pep:novel scaffold:cavPor3:scaffold_18:8160066:8185370:1 gene:ENSCPOG00000005418 transcript:ENSCPOT00000005476	K294	Acetylation	20% (6.68)	0.200481	2	0	0	0	0	0	0	0	0	0	0	0	0	0	0	0	0	0	0	0	0	0	0	0
ENSCPOP00000005538	pep:novel scaffold:cavPor3:scaffold_72:6798826:6803599:1 gene:ENSCPOG00000006141 transcript:ENSCPOT00000006205	K263	Acetylation	19% (0.00)	0.186244	0	0	0	0	0	0	0	0	0	0	0	0	0	0	0	0	0	0	0	0	0	1	0	0
ENSCPOP00000016138	pep:novel scaffold:cavPor3:scaffold_70:264329:268759:1 gene:ENSCPOG00000020449 transcript:ENSCPOT00000021458	K38	Acetylation	14% (0.00)	0.142286	0	0	0	0	0	0	0	0	0	0	0	0	0	0	0	0	0	0	0	0	0	0	1	1
ENSCPOP00000012030	pep:novel scaffold:cavPor3:scaffold_115:3032722:3062306:1 gene:ENSCPOG00000013363 transcript:ENSCPOT00000013494	K85	Acetylation	14% (0.00)	0.139268	0	0	0	0	0	0	0	0	0	0	0	0	0	0	0	0	0	0	1	0	2	0	0	0
ENSCPOP00000000366	pep:novel scaffold:cavPor3:scaffold_3:60137952:60141698:1 gene:ENSCPOG00000000415 transcript:ENSCPOT00000000418	K50	Acetylation	14% (0.00)	0.135719	0	0	0	0	2	1	0	0	0	3	0	0	0	0	0	0	0	1	0	0	0	0	0	0
ENSCPOP00000013564	pep:novel scaffold:cavPor3:scaffold_136:798095:818006:1 gene:ENSCPOG00000015048 transcript:ENSCPOT00000015195	K87	Acetylation	11% (0.00)	0.109879	0	0	1	0	0	0	0	0	0	0	0	0	0	0	0	0	0	0	0	0	0	0	0	0
ENSCPOP00000011443	pep:novel scaffold:cavPor3:scaffold_14:19065414:19075174:1 gene:ENSCPOG00000012719 transcript:ENSCPOT00000012841	K238	Acetylation	9% (0.00)	0.0888814	0	0	1	0	0	0	0	0	0	0	0	0	0	0	0	0	0	0	0	0	0	0	0	0
ENSCPOP00000017860	pep:novel scaffold:cavPor3:scaffold_10:17131108:17133201:1 gene:ENSCPOG00000024878 transcript:ENSCPOT00000027660	K84	Acetylation	9% (-0.79)	0.0868345	0	0	0	0	0	0	0	0	0	0	0	0	0	0	0	0	2	0	0	0	0	0	0	0
ENSCPOP00000015742	pep:novel scaffold:cavPor3:scaffold_43:7663463:7696221:1 gene:ENSCPOG00000024229 transcript:ENSCPOT00000020193	K126	Acetylation	7% (0.00)	0.0744451	1	0	0	0	0	0	0	0	0	0	0	0	0	0	0	0	0	0	0	0	0	0	0	0
ENSCPOP00000011828	pep:novel scaffold:cavPor3:scaffold_61:10028635:10033077:1 gene:ENSCPOG00000013139 transcript:ENSCPOT00000013266	K197	Acetylation	6% (0.00)	0.0583353	0	0	0	0	0	0	0	0	0	0	0	0	0	0	0	0	1	0	0	0	0	0	0	0
ENSCPOP00000010543	pep:novel scaffold:cavPor3:scaffold_19:35747084:35775346:-1 gene:ENSCPOG00000011723 transcript:ENSCPOT00000011837	K454	Acetylation	5% (-3.22)	0.0466984	0	0	0	0	0	0	0	0	0	0	0	0	0	0	0	0	0	0	0	1	0	0	0	0
ENSCPOP00000010730	pep:novel scaffold:cavPor3:scaffold_21:15123631:15146990:1 gene:ENSCPOG00000011927 transcript:ENSCPOT00000012042	K191	Acetylation	5% (0.00)	0.046475	0	0	0	0	0	0	0	0	0	0	0	0	1	0	0	0	0	0	0	0	0	0	0	0
ENSCPOP00000008856	pep:novel scaffold:cavPor3:scaffold_13:43106696:43133822:-1 gene:ENSCPOG00000009871 transcript:ENSCPOT00000009960	K293	Acetylation	3% (0.00)	0.034097	0	0	0	0	0	0	0	0	1	0	0	0	0	0	0	0	0	0	0	0	0	0	0	0
ENSCPOP00000010265	pep:novel scaffold:cavPor3:scaffold_90:789763:796018:1 gene:ENSCPOG00000011419 transcript:ENSCPOT00000011525	K176	Acetylation	3% (-2.92)	0.0250853	0	0	0	0	0	0	0	0	0	0	0	1	0	0	0	0	0	0	0	0	0	0	0	0
ENSCPOP00000011074	pep:novel scaffold:cavPor3:scaffold_107:589423:596421:1 gene:ENSCPOG00000012311 transcript:ENSCPOT00000012428	K130	Acetylation	2% (-8.42)	0.0203296	0	0	3	0	0	0	0	0	0	0	0	0	2	0	0	0	0	0	0	0	0	0	0	0
ENSCPOP00000019902	pep:novel scaffold:cavPor3:scaffold_98:4333064:4340592:1 gene:ENSCPOG00000024832 transcript:ENSCPOT00000028027	K72	Acetylation	1% (0.00)	0.0147049	0	0	0	0	0	0	0	0	0	0	0	0	0	0	0	0	0	0	0	0	1	0	0	0
ENSCPOP00000014751	pep:novel scaffold:cavPor3:scaffold_3:11929130:11992796:1 gene:ENSCPOG00000003907 transcript:ENSCPOT00000022569	K14744	Acetylation	1% (-5.80)	0.00701499	0	0	0	0	0	0	0	0	0	0	0	0	0	1	0	0	0	0	0	0	0	0	0	0
ENSCPOP00000011810	pep:novel scaffold:cavPor3:scaffold_6:17231705:17263534:1 gene:ENSCPOG00000013120 transcript:ENSCPOT00000013247	K66	Acetylation	0% (0.00)	0.00407929	0	0	2	0	0	0	0	0	1	0	0	0	0	0	0	0	0	0	0	0	0	0	0	0
ENSCPOP00000002739	pep:novel scaffold:cavPor3:scaffold_79:6044181:6048145:-1 gene:ENSCPOG00000003025 transcript:ENSCPOT00000003064	K289	Acetylation	0% (0.00)	0.00395031	0	0	0	0	0	0	0	0	0	0	0	0	0	0	0	0	0	1	0	0	0	0	0	0
ENSCPOP00000006354	pep:known scaffold:cavPor3:scaffold_13:17431200:17450183:1 gene:ENSCPOG00000007045 transcript:ENSCPOT00000007114	K1445	Acetylation	0% (0.00)	0.00395031	0	0	1	0	0	0	0	0	0	0	0	0	0	0	0	0	0	0	0	0	0	0	0	0
ENSCPOP00000006354	pep:known scaffold:cavPor3:scaffold_13:17431200:17450183:1 gene:ENSCPOG00000007045 transcript:ENSCPOT00000007114	K940	Acetylation	0% (0.00)	0.0022987	0	0	0	0	0	0	0	0	0	0	0	1	0	0	0	0	0	0	0	0	0	0	0	0
ENSCPOP00000004119	pep:novel scaffold:cavPor3:scaffold_7:35044434:35064153:1 gene:ENSCPOG00000004569 transcript:ENSCPOT00000004618	K285	Acetylation	0% (-5.31)	0.00100667	0	0	0	0	0	0	0	0	0	0	0	0	0	0	0	0	0	0	1	0	0	0	0	0
ENSCPOP00000016071	pep:known scaffold:cavPor3:scaffold_9:41594606:41602141:1 gene:ENSCPOG00000023092 transcript:ENSCPOT00000021512	K266	Acetylation	0% (-8.15)	0.000654507	1	0	0	0	0	0	0	0	0	0	0	0	0	0	0	0	0	0	0	0	0	0	0	0
ENSCPOP00000011443	pep:novel scaffold:cavPor3:scaffold_14:19065414:19075174:1 gene:ENSCPOG00000012719 transcript:ENSCPOT00000012841	K538	Acetylation	0% (0.00)	0.000323094	0	0	0	2	0	0	0	1	0	0	0	0	0	0	0	0	0	0	0	0	0	0	0	0
ENSCPOP00000004877	pep:novel scaffold:cavPor3:scaffold_18:8160066:8185370:1 gene:ENSCPOG00000005418 transcript:ENSCPOT00000005476	K191	Acetylation	0% (0.00)	0.000207833	1	0	2	0	0	0	0	0	0	0	0	0	0	0	0	0	0	0	0	0	0	0	0	0
ENSCPOP00000013906	pep:novel scaffold:cavPor3:scaffold_4:5796066:5808668:1 gene:ENSCPOG00000015423 transcript:ENSCPOT00000015574	K139	Acetylation	0% (0.00)	4.09582e-05	1	0	0	0	0	0	0	0	0	0	0	0	0	0	0	0	0	0	0	0	0	0	0	0
ENSCPOP00000019052	pep:novel scaffold:cavPor3:scaffold_30:1810086:1811303:1 gene:ENSCPOG00000023568 transcript:ENSCPOT00000023996	K200	Acetylation	0% (0.00)	1.74308e-05	0	0	0	0	0	0	0	0	0	1	0	0	0	0	0	0	0	0	0	0	0	0	0	0
ENSCPOP00000016987	pep:novel scaffold:cavPor3:scaffold_104:3179479:3187399:1 gene:ENSCPOG00000002588 transcript:ENSCPOT00000002622	K416	Acetylation	0% (0.00)	1.67771e-05	0	0	0	0	0	0	0	0	0	0	0	0	0	0	0	0	0	0	0	0	0	1	0	0
ENSCPOP00000016471	pep:novel scaffold:cavPor3:scaffold_80:5809338:5818944:-1 gene:ENSCPOG00000019609 transcript:ENSCPOT00000025445	K266	Acetylation	0% (0.00)	5.30827e-06	0	0	0	0	0	1	0	0	0	0	0	0	0	0	0	0	0	0	0	0	0	0	0	0
ENSCPOP00000008332	pep:novel scaffold:cavPor3:scaffold_59:2045699:2060270:1 gene:ENSCPOG00000009280 transcript:ENSCPOT00000009365	K344	Acetylation	0% (-15.32)	7.72141e-07	0	0	0	0	0	0	0	0	0	0	0	0	1	0	0	0	0	0	0	0	0	0	0	0
ENSCPOP00000002392	pep:known scaffold:cavPor3:scaffold_66:2406002:2408736:-1 gene:ENSCPOG00000002632 transcript:ENSCPOT00000002666	K134	Acetylation	0% (0.00)	4.29539e-07	0	0	0	0	0	1	0	0	0	0	0	0	0	0	0	0	0	0	0	0	0	0	0	0
ENSCPOP00000000366	pep:novel scaffold:cavPor3:scaffold_3:60137952:60141698:1 gene:ENSCPOG00000000415 transcript:ENSCPOT00000000418	K14	Acetylation	0% (-11.00)	8.30194e-08	0	0	0	0	0	0	0	0	1	0	0	0	0	0	0	0	0	0	0	0	0	0	0	0

## Sheet: Spectrum Report Ac Peptides
Experiment: AllGPDataMerged
	Search Engine Set: 2 Search Engines
	Search Engine: Mascot
		Version: Mascot
		Samples: All Samples
		Fragment Tolerance: 0.80 Da (Monoisotopic)
		Parent Tolerance: 10.0 PPM (Monoisotopic)
		Fixed Modifications: +57 on C (Carbamidomethyl)
		Variable Modifications: -17 on n (Pyro-cmC), +16 on M (Oxidation), +42 on K (Acetyl)
		Database: Database: Cavia_porcellus.cavPor3.59.pep.fasta (19774 entries)
		Digestion Enzyme: Trypsin
		Max Missed Cleavages: 4
	Search Engine: X! Tandem
		Version: 2007.01.01.1
		Samples: All Samples
		Fragment Tolerance: 0.80 Da (Monoisotopic)
		Parent Tolerance: 10.0 PPM (Monoisotopic)
		Fixed Modifications: +57 on C (Carbamidomethyl)
		Variable Modifications: -17 on n (Pyro-cmC), +16 on M (Oxidation), +42 on K (Acetyl)
		Database: Cavia_porcellus.cavPor3.59.pep.fasta (19774 entries)
		Digestion Enzyme: Trypsin
		Max Missed Cleavages: 4
	Scaffold Version: Scaffold_3.1.2
		Peptide Thresholds: 90.0% minimum
		Protein Thresholds: 90.0% minimum and 1 peptides minimum
Spectrum name	Peptide sequence	Variable modifications identified by spectrum	Protein accession numbers	Subcellular Fraction	Biological Replicate #	Peptide identification probability	Mascot Ion score	Mascot Identity score	Mascot Delta Ion Score	X! Tandem -log(e) score	Number of enzymatic termini	Observed m/z	Actual peptide mass (AMU)	Calculated +1H Peptide Mass (AMU)	Spectrum charge	Actual minus calculated peptide mass (AMU)	Actual minus calculated peptide mass (PPM)	Peptide start index	Peptide stop index	Protein molecular weight (Da)	Protein identification probability	Number of unique peptides	Number of unique spectra	Number of total spectra	Percentage of total spectra	Percentage sequence coverage	Manual validation	Assigned	Previous amino acid	Next amino acid	Exclusive	Other Proteins	MS/MS sample name	Protein name	Database sources
Spectrum37364 scans:10412,	AQFEGIVTDLIkR	k12: Acetyl (+42.01)	ENSCPOP00000002148	Mito-rich	Mito_GP1	0.95	30	27.7	16.6	0	2	511.288	1530.84	1531.85	3	-0.0001347	-0.0879	348	360	73512.2	1	6	9	43	0.00309	0.0988	correct	TRUE	R	T	TRUE		File Name: S_2-1.raw (F057099)	pep:novel scaffold:cavPor3:scaffold_6:963339:978817:-1 gene:ENSCPOG00000002363 transcript:ENSCPOT00000002396	Cavia_porcellus.cavPor3.59.pep.fasta
Spectrum28594 scans:10532,	AQFEGIVTDLIkR	k12: Acetyl (+42.01)	ENSCPOP00000002148	Mito-rich	Mito_GP1	0.95	44.5	27.7	32.5	2.2	2	511.288	1530.84	1531.85	3	-0.0001347	-0.0879	348	360	73512.2	1	6	9	43	0.00309	0.0988	possibly correct	TRUE	R	T	TRUE		File Name: S_2-1.raw (F057099)	pep:novel scaffold:cavPor3:scaffold_6:963339:978817:-1 gene:ENSCPOG00000002363 transcript:ENSCPOT00000002396	Cavia_porcellus.cavPor3.59.pep.fasta
Spectrum6845 scans:9763,	AQFEGIVTDLIkR	k12: Acetyl (+42.01)	ENSCPOP00000002148	Mito-rich	Mito_GP1	0.95	79.1	27.7	67.7	4.15	2	766.428	1530.84	1531.85	2	0.0009313	0.608	348	360	73512.2	1	6	9	43	0.00309	0.0988	possibly correct	TRUE	R	T	TRUE		File Name: S_2-1.raw (F057099)	pep:novel scaffold:cavPor3:scaffold_6:963339:978817:-1 gene:ENSCPOG00000002363 transcript:ENSCPOT00000002396	Cavia_porcellus.cavPor3.59.pep.fasta
Spectrum6849 scans:9768,	AQFEGIVTDLIkR	k12: Acetyl (+42.01)	ENSCPOP00000002148	Mito-rich	Mito_GP1	0.95	79.4	27.7	65.5	4.54	2	766.428	1530.84	1531.85	2	0.0009313	0.608	348	360	73512.2	1	6	9	43	0.00309	0.0988	possibly correct	TRUE	R	T	TRUE		File Name: S_2-1.raw (F057099)	pep:novel scaffold:cavPor3:scaffold_6:963339:978817:-1 gene:ENSCPOG00000002363 transcript:ENSCPOT00000002396	Cavia_porcellus.cavPor3.59.pep.fasta
Spectrum37352 scans:10399,	AQFEGIVTDLIkR	k12: Acetyl (+42.01)	ENSCPOP00000002148	Mito-rich	Mito_GP1	0.95	79.2	27.4	70.7	4.24	2	766.429	1530.84	1531.85	2	0.001791	1.169	348	360	73512.2	1	6	9	43	0.00309	0.0988	possibly correct	TRUE	R	T	TRUE		File Name: S_2-1.raw (F057099)	pep:novel scaffold:cavPor3:scaffold_6:963339:978817:-1 gene:ENSCPOG00000002363 transcript:ENSCPOT00000002396	Cavia_porcellus.cavPor3.59.pep.fasta
Spectrum28593 scans:10531,	AQFEGIVTDLIkR	k12: Acetyl (+42.01)	ENSCPOP00000002148	Mito-rich	Mito_GP1	0.95	84.2	27.4	75.4	4.64	2	766.428	1530.84	1531.85	2	0.001291	0.843	348	360	73512.2	1	6	9	43	0.00309	0.0988	possibly correct	TRUE	R	T	TRUE		File Name: S_2-1.raw (F057099)	pep:novel scaffold:cavPor3:scaffold_6:963339:978817:-1 gene:ENSCPOG00000002363 transcript:ENSCPOT00000002396	Cavia_porcellus.cavPor3.59.pep.fasta
Spectrum23739 scans:5250,	ETGVDLTkDNmALQR	k8: Acetyl (+42.01), m11: Oxidation (+15.99)	ENSCPOP00000002148	Mito-rich	Mito_GP1	0.95	33.7	26.1	22.7	0	2	583.621	1747.84	1748.85	3	-8.966e-05	-0.05127	292	306	73512.2	1	6	9	43	0.00309	0.0988	possibly correct	TRUE	R	V	TRUE		File Name: S_2-1.raw (F057099)	pep:novel scaffold:cavPor3:scaffold_6:963339:978817:-1 gene:ENSCPOG00000002363 transcript:ENSCPOT00000002396	Cavia_porcellus.cavPor3.59.pep.fasta
Spectrum23745 scans:5258,	ETGVDLTkDNmALQR	k8: Acetyl (+42.01), m11: Oxidation (+15.99)	ENSCPOP00000002148	Mito-rich	Mito_GP1	0.95	47.7	26	41.1	0.77	2	583.621	1747.84	1748.85	3	0.0004803	0.2747	292	306	73512.2	1	6	9	43	0.00309	0.0988	possibly correct	TRUE	R	V	TRUE		File Name: S_2-1.raw (F057099)	pep:novel scaffold:cavPor3:scaffold_6:963339:978817:-1 gene:ENSCPOG00000002363 transcript:ENSCPOT00000002396	Cavia_porcellus.cavPor3.59.pep.fasta
Spectrum33820 scans:6568,	ETGVDLTkDNMALQR	k8: Acetyl (+42.01)	ENSCPOP00000002148	Mito-rich	Mito_GP1	0.95	50.3	27.1	44.5	2.72	2	866.93	1731.85	1732.85	2	-0.0001487	-0.08579	292	306	73512.2	1	6	9	43	0.00309	0.0988	possibly correct	TRUE	R	V	TRUE		File Name: S_2-1.raw (F057099)	pep:novel scaffold:cavPor3:scaffold_6:963339:978817:-1 gene:ENSCPOG00000002363 transcript:ENSCPOT00000002396	Cavia_porcellus.cavPor3.59.pep.fasta
Spectrum23791 scans:5314,	ETGVDLTkDNmALQR	k8: Acetyl (+42.01), m11: Oxidation (+15.99)	ENSCPOP00000002148	Mito-rich	Mito_GP1	0.95	50.3	26.1	47.6	3.16	2	874.928	1747.84	1748.85	2	-0.0001837	-0.105	292	306	73512.2	1	6	9	43	0.00309	0.0988	possibly correct	TRUE	R	V	TRUE		File Name: S_2-1.raw (F057099)	pep:novel scaffold:cavPor3:scaffold_6:963339:978817:-1 gene:ENSCPOG00000002363 transcript:ENSCPOT00000002396	Cavia_porcellus.cavPor3.59.pep.fasta
Spectrum32602 scans:5207,	ETGVDLTkDNmALQR	k8: Acetyl (+42.01), m11: Oxidation (+15.99)	ENSCPOP00000002148	Mito-rich	Mito_GP1	0.95	54.6	26.1	52.7	3.57	2	874.928	1747.84	1748.85	2	-0.0005637	-0.3223	292	306	73512.2	1	6	9	43	0.00309	0.0988	possibly correct	TRUE	R	V	TRUE		File Name: S_2-1.raw (F057099)	pep:novel scaffold:cavPor3:scaffold_6:963339:978817:-1 gene:ENSCPOG00000002363 transcript:ENSCPOT00000002396	Cavia_porcellus.cavPor3.59.pep.fasta
Spectrum32522 scans:5112,	ETGVDLTkDNmALQR	k8: Acetyl (+42.01), m11: Oxidation (+15.99)	ENSCPOP00000002148	Mito-rich	Mito_GP1	0.95	63.4	26.5	61	3.48	2	874.929	1747.84	1748.85	2	0.002496	1.427	292	306	73512.2	1	6	9	43	0.00309	0.0988	possibly correct	TRUE	R	V	TRUE		File Name: S_2-1.raw (F057099)	pep:novel scaffold:cavPor3:scaffold_6:963339:978817:-1 gene:ENSCPOG00000002363 transcript:ENSCPOT00000002396	Cavia_porcellus.cavPor3.59.pep.fasta
Spectrum23720 scans:5227,	ETGVDLTkDNmALQR	k8: Acetyl (+42.01), m11: Oxidation (+15.99)	ENSCPOP00000002148	Mito-rich	Mito_GP1	0.95	63.9	26	63.9	3.66	2	874.928	1747.84	1748.85	2	0.0005363	0.3067	292	306	73512.2	1	6	9	43	0.00309	0.0988	possibly correct	TRUE	R	V	TRUE		File Name: S_2-1.raw (F057099)	pep:novel scaffold:cavPor3:scaffold_6:963339:978817:-1 gene:ENSCPOG00000002363 transcript:ENSCPOT00000002396	Cavia_porcellus.cavPor3.59.pep.fasta
Spectrum32526 scans:5117,	ETGVDLTkDNmALQR	k8: Acetyl (+42.01), m11: Oxidation (+15.99)	ENSCPOP00000002148	Mito-rich	Mito_GP1	0.95	64.1	26.1	60.9	4.72	2	874.928	1747.84	1748.85	2	5.634e-05	0.03221	292	306	73512.2	1	6	9	43	0.00309	0.0988	possibly correct	TRUE	R	V	TRUE		File Name: S_2-1.raw (F057099)	pep:novel scaffold:cavPor3:scaffold_6:963339:978817:-1 gene:ENSCPOG00000002363 transcript:ENSCPOT00000002396	Cavia_porcellus.cavPor3.59.pep.fasta
Spectrum2230 scans:4791,	ETGVDLTkDNmALQR	k8: Acetyl (+42.01), m11: Oxidation (+15.99)	ENSCPOP00000002148	Mito-rich	Mito_GP1	0.95	66.1	26.4	62.2	2.38	2	874.929	1747.84	1748.85	2	0.001636	0.9357	292	306	73512.2	1	6	9	43	0.00309	0.0988	possibly correct	TRUE	R	V	TRUE		File Name: S_2-1.raw (F057099)	pep:novel scaffold:cavPor3:scaffold_6:963339:978817:-1 gene:ENSCPOG00000002363 transcript:ENSCPOT00000002396	Cavia_porcellus.cavPor3.59.pep.fasta
Spectrum12230 scans:6181,	ETGVDLTkDNmALQR	k8: Acetyl (+42.01), m11: Oxidation (+15.99)	ENSCPOP00000002148	Mito-rich	Mito_GP1	0.95	74.1	26.2	71.5	4.33	2	874.927	1747.84	1748.85	2	-0.001404	-0.8026	292	306	73512.2	1	6	9	43	0.00309	0.0988	possibly correct	TRUE	R	V	TRUE		File Name: S_2-1.raw (F057099)	pep:novel scaffold:cavPor3:scaffold_6:963339:978817:-1 gene:ENSCPOG00000002363 transcript:ENSCPOT00000002396	Cavia_porcellus.cavPor3.59.pep.fasta
Spectrum773 scans:2879,	HIVkEFK	k4: Acetyl (+42.01)	ENSCPOP00000002148	Mito-rich	Mito_GP1	0.95	24.2	26.7	12.3	2.47	2	471.774	941.534	942.541	2	-4.865e-05	-0.05162	284	290	73512.2	1	6	9	43	0.00309	0.0988	possibly correct	TRUE	R	R	TRUE		File Name: S_2-1.raw (F057099)	pep:novel scaffold:cavPor3:scaffold_6:963339:978817:-1 gene:ENSCPOG00000002363 transcript:ENSCPOT00000002396	Cavia_porcellus.cavPor3.59.pep.fasta
Spectrum709 scans:2778,	HIVkEFK	k4: Acetyl (+42.01)	ENSCPOP00000002148	Mito-rich	Mito_GP1	0.95	25.6	26.7	12.7	1.52	2	471.774	941.533	942.541	2	-0.0003087	-0.3275	284	290	73512.2	1	6	9	43	0.00309	0.0988	possibly correct	TRUE	R	R	TRUE		File Name: S_2-1.raw (F057099)	pep:novel scaffold:cavPor3:scaffold_6:963339:978817:-1 gene:ENSCPOG00000002363 transcript:ENSCPOT00000002396	Cavia_porcellus.cavPor3.59.pep.fasta
Spectrum21783 scans:2662,	HIVkEFK	k4: Acetyl (+42.01)	ENSCPOP00000002148	Mito-rich	Mito_GP1	0.95	28.9	26.7	16.7	1.47	2	471.774	941.533	942.541	2	-0.0002287	-0.2426	284	290	73512.2	1	6	9	43	0.00309	0.0988	possibly correct	TRUE	R	R	TRUE		File Name: S_2-1.raw (F057099)	pep:novel scaffold:cavPor3:scaffold_6:963339:978817:-1 gene:ENSCPOG00000002363 transcript:ENSCPOT00000002396	Cavia_porcellus.cavPor3.59.pep.fasta
Spectrum30679 scans:2612,	HIVkEFK	k4: Acetyl (+42.01)	ENSCPOP00000002148	Mito-rich	Mito_GP1	0.95	29.3	26.7	14.8	1.7	2	471.774	941.533	942.541	2	-0.0001687	-0.1789	284	290	73512.2	1	6	9	43	0.00309	0.0988	possibly correct	TRUE	R	R	TRUE		File Name: S_2-1.raw (F057099)	pep:novel scaffold:cavPor3:scaffold_6:963339:978817:-1 gene:ENSCPOG00000002363 transcript:ENSCPOT00000002396	Cavia_porcellus.cavPor3.59.pep.fasta
Spectrum830 scans:2973,	HIVkEFK	k4: Acetyl (+42.01)	ENSCPOP00000002148	Mito-rich	Mito_GP1	0.95	30.1	26.7	13.7	1.41	2	471.774	941.533	942.541	2	-0.0001687	-0.1789	284	290	73512.2	1	6	9	43	0.00309	0.0988	possibly correct	TRUE	R	R	TRUE		File Name: S_2-1.raw (F057099)	pep:novel scaffold:cavPor3:scaffold_6:963339:978817:-1 gene:ENSCPOG00000002363 transcript:ENSCPOT00000002396	Cavia_porcellus.cavPor3.59.pep.fasta
Spectrum30721 scans:2686,	HIVkEFK	k4: Acetyl (+42.01)	ENSCPOP00000002148	Mito-rich	Mito_GP1	0.95	30.7	26.7	11.8	2.15	2	471.774	941.533	942.541	2	-0.0004287	-0.4548	284	290	73512.2	1	6	9	43	0.00309	0.0988	possibly correct	TRUE	R	R	TRUE		File Name: S_2-1.raw (F057099)	pep:novel scaffold:cavPor3:scaffold_6:963339:978817:-1 gene:ENSCPOG00000002363 transcript:ENSCPOT00000002396	Cavia_porcellus.cavPor3.59.pep.fasta
Spectrum21842 scans:2751,	HIVkEFK	k4: Acetyl (+42.01)	ENSCPOP00000002148	Mito-rich	Mito_GP1	0.95	30.9	26.7	19.8	1.77	2	471.774	941.533	942.541	2	-0.0003087	-0.3275	284	290	73512.2	1	6	9	43	0.00309	0.0988	possibly correct	TRUE	R	R	TRUE		File Name: S_2-1.raw (F057099)	pep:novel scaffold:cavPor3:scaffold_6:963339:978817:-1 gene:ENSCPOG00000002363 transcript:ENSCPOT00000002396	Cavia_porcellus.cavPor3.59.pep.fasta
Spectrum32625 scans:5235,	mEEFkDQLPADEcNK	m1: Oxidation (+15.99), k5: Acetyl (+42.01), c13: Carbamidomethyl (+57.02)	ENSCPOP00000002148	Mito-rich	Mito_GP1	0.95	51.7	25	51.2	3.85	2	956.41	1910.81	1911.81	2	0.003091	1.617	595	609	73512.2	1	6	9	43	0.00309	0.0988	possibly correct	TRUE	K	L	TRUE		File Name: S_2-1.raw (F057099)	pep:novel scaffold:cavPor3:scaffold_6:963339:978817:-1 gene:ENSCPOG00000002363 transcript:ENSCPOT00000002396	Cavia_porcellus.cavPor3.59.pep.fasta
Spectrum23813 scans:5340,	mEEFkDQLPADEcNK	m1: Oxidation (+15.99), k5: Acetyl (+42.01), c13: Carbamidomethyl (+57.02)	ENSCPOP00000002148	Mito-rich	Mito_GP1	0.95	55.7	25	55.7	4.74	2	956.409	1910.8	1911.81	2	0.001011	0.5288	595	609	73512.2	1	6	9	43	0.00309	0.0988	possibly correct	TRUE	K	L	TRUE		File Name: S_2-1.raw (F057099)	pep:novel scaffold:cavPor3:scaffold_6:963339:978817:-1 gene:ENSCPOG00000002363 transcript:ENSCPOT00000002396	Cavia_porcellus.cavPor3.59.pep.fasta
Spectrum32621 scans:5230,	mEEFkDQLPADEcNK	m1: Oxidation (+15.99), k5: Acetyl (+42.01), c13: Carbamidomethyl (+57.02)	ENSCPOP00000002148	Mito-rich	Mito_GP1	0.95	61.1	25	61.1	3.85	2	956.41	1910.81	1911.81	2	0.002111	1.104	595	609	73512.2	1	6	9	43	0.00309	0.0988	possibly correct	TRUE	K	L	TRUE		File Name: S_2-1.raw (F057099)	pep:novel scaffold:cavPor3:scaffold_6:963339:978817:-1 gene:ENSCPOG00000002363 transcript:ENSCPOT00000002396	Cavia_porcellus.cavPor3.59.pep.fasta
Spectrum23868 scans:5405,	mEEFkDQLPADEcNK	m1: Oxidation (+15.99), k5: Acetyl (+42.01), c13: Carbamidomethyl (+57.02)	ENSCPOP00000002148	Mito-rich	Mito_GP1	0.95	64.2	25	64.2	5.77	2	956.41	1910.8	1911.81	2	0.001751	0.9159	595	609	73512.2	1	6	9	43	0.00309	0.0988	possibly correct	TRUE	K	L	TRUE		File Name: S_2-1.raw (F057099)	pep:novel scaffold:cavPor3:scaffold_6:963339:978817:-1 gene:ENSCPOG00000002363 transcript:ENSCPOT00000002396	Cavia_porcellus.cavPor3.59.pep.fasta
Spectrum32629 scans:5240,	mEEFkDQLPADEcNK	m1: Oxidation (+15.99), k5: Acetyl (+42.01), c13: Carbamidomethyl (+57.02)	ENSCPOP00000002148	Mito-rich	Mito_GP1	0.95	70.6	25	70.6	4.59	2	956.409	1910.8	1911.81	2	0.000531	0.2778	595	609	73512.2	1	6	9	43	0.00309	0.0988	possibly correct	TRUE	K	L	TRUE		File Name: S_2-1.raw (F057099)	pep:novel scaffold:cavPor3:scaffold_6:963339:978817:-1 gene:ENSCPOG00000002363 transcript:ENSCPOT00000002396	Cavia_porcellus.cavPor3.59.pep.fasta
Spectrum23822 scans:5350,	mEEFkDQLPADEcNK	m1: Oxidation (+15.99), k5: Acetyl (+42.01), c13: Carbamidomethyl (+57.02)	ENSCPOP00000002148	Mito-rich	Mito_GP1	0.95	71.3	25	71.3	5.43	2	956.409	1910.8	1911.81	2	-0.000569	-0.2976	595	609	73512.2	1	6	9	43	0.00309	0.0988	possibly correct	TRUE	K	L	TRUE		File Name: S_2-1.raw (F057099)	pep:novel scaffold:cavPor3:scaffold_6:963339:978817:-1 gene:ENSCPOG00000002363 transcript:ENSCPOT00000002396	Cavia_porcellus.cavPor3.59.pep.fasta
Spectrum2352 scans:4933,	mEEFkDQLPADEcNK	m1: Oxidation (+15.99), k5: Acetyl (+42.01), c13: Carbamidomethyl (+57.02)	ENSCPOP00000002148	Mito-rich	Mito_GP1	0.95	71.4	25	70.2	3.44	2	956.409	1910.8	1911.81	2	0.000771	0.4033	595	609	73512.2	1	6	9	43	0.00309	0.0988	possibly correct	TRUE	K	L	TRUE		File Name: S_2-1.raw (F057099)	pep:novel scaffold:cavPor3:scaffold_6:963339:978817:-1 gene:ENSCPOG00000002363 transcript:ENSCPOT00000002396	Cavia_porcellus.cavPor3.59.pep.fasta
Spectrum12350 scans:6308,	mEEFkDQLPADEcNK	m1: Oxidation (+15.99), k5: Acetyl (+42.01), c13: Carbamidomethyl (+57.02)	ENSCPOP00000002148	Mito-rich	Mito_GP1	0.95	71.6	25	70.6	6.7	2	956.408	1910.8	1911.81	2	-0.000829	-0.4336	595	609	73512.2	1	6	9	43	0.00309	0.0988	possibly correct	TRUE	K	L	TRUE		File Name: S_2-1.raw (F057099)	pep:novel scaffold:cavPor3:scaffold_6:963339:978817:-1 gene:ENSCPOG00000002363 transcript:ENSCPOT00000002396	Cavia_porcellus.cavPor3.59.pep.fasta
Spectrum1099 scans:3393,	RYDDPEVQkDIK	k9: Acetyl (+42.01)	ENSCPOP00000002148	Mito-rich	Mito_GP1	0.95	31.1	27.5	20.9	0.0458	2	516.595	1546.76	1547.77	3	0.0002253	0.1456	126	137	73512.2	1	6	9	43	0.00309	0.0988	possibly correct	TRUE	R	N	TRUE		File Name: S_2-1.raw (F057099)	pep:novel scaffold:cavPor3:scaffold_6:963339:978817:-1 gene:ENSCPOG00000002363 transcript:ENSCPOT00000002396	Cavia_porcellus.cavPor3.59.pep.fasta
Spectrum22448 scans:3642,	RYDDPEVQkDIK	k9: Acetyl (+42.01)	ENSCPOP00000002148	Mito-rich	Mito_GP1	0.95	34	27.5	19.5	1.64	2	774.389	1546.76	1547.77	2	0.0006113	0.395	126	137	73512.2	1	6	9	43	0.00309	0.0988	possibly correct	TRUE	R	N	TRUE		File Name: S_2-1.raw (F057099)	pep:novel scaffold:cavPor3:scaffold_6:963339:978817:-1 gene:ENSCPOG00000002363 transcript:ENSCPOT00000002396	Cavia_porcellus.cavPor3.59.pep.fasta
Spectrum22425 scans:3611,	RYDDPEVQkDIK	k9: Acetyl (+42.01)	ENSCPOP00000002148	Mito-rich	Mito_GP1	0.95	35.3	27.5	14.8	0.131	2	516.595	1546.76	1547.77	3	-0.0004947	-0.3196	126	137	73512.2	1	6	9	43	0.00309	0.0988	possibly correct	TRUE	R	N	TRUE		File Name: S_2-1.raw (F057099)	pep:novel scaffold:cavPor3:scaffold_6:963339:978817:-1 gene:ENSCPOG00000002363 transcript:ENSCPOT00000002396	Cavia_porcellus.cavPor3.59.pep.fasta
Spectrum31267 scans:3519,	RYDDPEVQkDIK	k9: Acetyl (+42.01)	ENSCPOP00000002148	Mito-rich	Mito_GP1	0.95	36.3	27.5	15	0.921	2	516.595	1546.76	1547.77	3	-0.0003147	-0.2033	126	137	73512.2	1	6	9	43	0.00309	0.0988	possibly correct	TRUE	R	N	TRUE		File Name: S_2-1.raw (F057099)	pep:novel scaffold:cavPor3:scaffold_6:963339:978817:-1 gene:ENSCPOG00000002363 transcript:ENSCPOT00000002396	Cavia_porcellus.cavPor3.59.pep.fasta
Spectrum22383 scans:3556,	RYDDPEVQkDIK	k9: Acetyl (+42.01)	ENSCPOP00000002148	Mito-rich	Mito_GP1	0.95	39	26.9	24.7	1.36	2	774.388	1546.76	1547.77	2	-0.001349	-0.8714	126	137	73512.2	1	6	9	43	0.00309	0.0988	possibly correct	TRUE	R	N	TRUE		File Name: S_2-1.raw (F057099)	pep:novel scaffold:cavPor3:scaffold_6:963339:978817:-1 gene:ENSCPOG00000002363 transcript:ENSCPOT00000002396	Cavia_porcellus.cavPor3.59.pep.fasta
Spectrum10635 scans:4447,	RYDDPEVQkDIK	k9: Acetyl (+42.01)	ENSCPOP00000002148	Mito-rich	Mito_GP1	0.95	41.9	27.5	20.3	0.444	2	516.595	1546.76	1547.77	3	-0.0004947	-0.3196	126	137	73512.2	1	6	9	43	0.00309	0.0988	possibly correct	TRUE	R	N	TRUE		File Name: S_2-1.raw (F057099)	pep:novel scaffold:cavPor3:scaffold_6:963339:978817:-1 gene:ENSCPOG00000002363 transcript:ENSCPOT00000002396	Cavia_porcellus.cavPor3.59.pep.fasta
Spectrum31244 scans:3486,	RYDDPEVQkDIK	k9: Acetyl (+42.01)	ENSCPOP00000002148	Mito-rich	Mito_GP1	0.95	42.3	27.5	27.9	1.74	2	774.389	1546.76	1547.77	2	-0.0001287	-0.08312	126	137	73512.2	1	6	9	43	0.00309	0.0988	possibly correct	TRUE	R	N	TRUE		File Name: S_2-1.raw (F057099)	pep:novel scaffold:cavPor3:scaffold_6:963339:978817:-1 gene:ENSCPOG00000002363 transcript:ENSCPOT00000002396	Cavia_porcellus.cavPor3.59.pep.fasta
Spectrum1132 scans:3441,	RYDDPEVQkDIK	k9: Acetyl (+42.01)	ENSCPOP00000002148	Mito-rich	Mito_GP1	0.95	44.6	27.5	24	0.569	2	516.595	1546.76	1547.77	3	-0.0004947	-0.3196	126	137	73512.2	1	6	9	43	0.00309	0.0988	possibly correct	TRUE	R	N	TRUE		File Name: S_2-1.raw (F057099)	pep:novel scaffold:cavPor3:scaffold_6:963339:978817:-1 gene:ENSCPOG00000002363 transcript:ENSCPOT00000002396	Cavia_porcellus.cavPor3.59.pep.fasta
Spectrum1115 scans:3417,	RYDDPEVQkDIK	k9: Acetyl (+42.01)	ENSCPOP00000002148	Mito-rich	Mito_GP1	0.95	44.8	27.5	30	1.62	2	774.389	1546.76	1547.77	2	0.0004913	0.3175	126	137	73512.2	1	6	9	43	0.00309	0.0988	possibly correct	TRUE	R	N	TRUE		File Name: S_2-1.raw (F057099)	pep:novel scaffold:cavPor3:scaffold_6:963339:978817:-1 gene:ENSCPOG00000002363 transcript:ENSCPOT00000002396	Cavia_porcellus.cavPor3.59.pep.fasta
Spectrum31238 scans:3477,	RYDDPEVQkDIK	k9: Acetyl (+42.01)	ENSCPOP00000002148	Mito-rich	Mito_GP1	0.95	47.2	27.2	33.4	1.34	2	774.39	1546.76	1547.77	2	0.001831	1.183	126	137	73512.2	1	6	9	43	0.00309	0.0988	possibly correct	TRUE	R	N	TRUE		File Name: S_2-1.raw (F057099)	pep:novel scaffold:cavPor3:scaffold_6:963339:978817:-1 gene:ENSCPOG00000002363 transcript:ENSCPOT00000002396	Cavia_porcellus.cavPor3.59.pep.fasta
Spectrum33575 scans:6298,	RYDDPEVQKDIkNVPFK	k12: Acetyl (+42.01)	ENSCPOP00000002148	Mito-rich	Mito_GP1	0.95	29.1	28.9	6.58	0	2	711.705	2132.09	2133.1	3	0.002305	1.081	126	142	73512.2	1	6	9	43	0.00309	0.0988	possibly correct	TRUE	R	I	TRUE		File Name: S_2-1.raw (F057099)	pep:novel scaffold:cavPor3:scaffold_6:963339:978817:-1 gene:ENSCPOG00000002363 transcript:ENSCPOT00000002396	Cavia_porcellus.cavPor3.59.pep.fasta
Spectrum24745 scans:6386,	RYDDPEVQKDIkNVPFK	k12: Acetyl (+42.01)	ENSCPOP00000002148	Mito-rich	Mito_GP1	0.95	31	28.9	11.2	0	2	711.704	2132.09	2133.1	3	-0.0004247	-0.1991	126	142	73512.2	1	6	9	43	0.00309	0.0988	possibly correct	TRUE	R	I	TRUE		File Name: S_2-1.raw (F057099)	pep:novel scaffold:cavPor3:scaffold_6:963339:978817:-1 gene:ENSCPOG00000002363 transcript:ENSCPOT00000002396	Cavia_porcellus.cavPor3.59.pep.fasta
Spectrum33738 scans:6476,	AQEIDQSNEFkDLR	k11: Acetyl (+42.01)	ENSCPOP00000018477	Mito-rich	Mito_GP1	0.95	85	25.5	83	3.89	2	867.919	1733.82	1734.83	2	0.0008513	0.4907	68	81	46615	1	6	6	9	0.000647	0.211	possibly correct	TRUE	K	E	TRUE		File Name: S_2-1.raw (F057099)	pep:novel scaffold:cavPor3:scaffold_10:26104234:26115917:1 gene:ENSCPOG00000021886 transcript:ENSCPOT00000026625	Cavia_porcellus.cavPor3.59.pep.fasta
Spectrum33661 scans:6391,	AQEIDQSNEFkDLR	k11: Acetyl (+42.01)	ENSCPOP00000018477	Mito-rich	Mito_GP1	0.95	86.9	25.5	81.4	7.12	2	867.918	1733.82	1734.83	2	-0.0001287	-0.07416	68	81	46615	1	6	6	9	0.000647	0.211	possibly correct	TRUE	K	E	TRUE		File Name: S_2-1.raw (F057099)	pep:novel scaffold:cavPor3:scaffold_10:26104234:26115917:1 gene:ENSCPOG00000021886 transcript:ENSCPOT00000026625	Cavia_porcellus.cavPor3.59.pep.fasta
Spectrum25850 scans:7596,	EFWkQLGK	k4: Acetyl (+42.01)	ENSCPOP00000018477	Mito-rich	Mito_GP1	0.95	33.5	25.9	23.1	-0.146	2	539.29	1076.56	1077.57	2	-0.001089	-1.01	82	89	46615	1	6	6	9	0.000647	0.211	possibly correct	TRUE	R	L	TRUE		File Name: S_2-1.raw (F057099)	pep:novel scaffold:cavPor3:scaffold_10:26104234:26115917:1 gene:ENSCPOG00000021886 transcript:ENSCPOT00000026625	Cavia_porcellus.cavPor3.59.pep.fasta
Spectrum34570 scans:7395,	FLQEHLAPkAQEIDQSNEFK	k9: Acetyl (+42.01)	ENSCPOP00000018477	Mito-rich	Mito_GP1	0.95	0	0	0	2.7	2	805.739	2414.2	2414.2	3	1.004	0.421	59	78	46615	1	6	6	9	0.000647	0.211	possibly correct	TRUE	K	D	TRUE		File Name: S_2-1.raw (F057099)	pep:novel scaffold:cavPor3:scaffold_10:26104234:26115917:1 gene:ENSCPOG00000021886 transcript:ENSCPOT00000026625	Cavia_porcellus.cavPor3.59.pep.fasta
Spectrum25745 scans:7484,	FLQEHLAPkAQEIDQSNEFK	k9: Acetyl (+42.01)	ENSCPOP00000018477	Mito-rich	Mito_GP1	0.95	38.2	28.9	30.4	2.52	2	805.404	2413.19	2414.2	3	-0.002395	-0.9919	59	78	46615	1	6	6	9	0.000647	0.211	possibly correct	TRUE	K	D	TRUE		File Name: S_2-1.raw (F057099)	pep:novel scaffold:cavPor3:scaffold_10:26104234:26115917:1 gene:ENSCPOG00000021886 transcript:ENSCPOT00000026625	Cavia_porcellus.cavPor3.59.pep.fasta
Spectrum5799 scans:8662,	GSNTcELIFEDckVPAANTLGQESK	c5: Carbamidomethyl (+57.02), c12: Carbamidomethyl (+57.02), k13: Acetyl (+42.01)	ENSCPOP00000018477	Mito-rich	Mito_GP1	0.95	23.3	25.2	17.1	1.07	2	937.439	2809.29	2810.3	3	0.003805	1.354	250	274	46615	1	6	6	9	0.000647	0.211	possibly correct	TRUE	R	G	TRUE		File Name: S_2-1.raw (F057099)	pep:novel scaffold:cavPor3:scaffold_10:26104234:26115917:1 gene:ENSCPOG00000021886 transcript:ENSCPOT00000026625	Cavia_porcellus.cavPor3.59.pep.fasta
Spectrum24331 scans:5929,	QTmAkFLQEHLAPK	m3: Oxidation (+15.99), k5: Acetyl (+42.01)	ENSCPOP00000018477	Mito-rich	Mito_GP1	0.943	23.2	27.7	15.5	-0.415	2	567.299	1698.88	1699.88	3	-0.0008097	-0.4763	54	67	46615	1	6	6	9	0.000647	0.211	possibly correct	TRUE	R	A	TRUE		File Name: S_2-1.raw (F057099)	pep:novel scaffold:cavPor3:scaffold_10:26104234:26115917:1 gene:ENSCPOG00000021886 transcript:ENSCPOT00000026625	Cavia_porcellus.cavPor3.59.pep.fasta
Spectrum33132 scans:5814,	QTmAkFLQEHLAPK	m3: Oxidation (+15.99), k5: Acetyl (+42.01)	ENSCPOP00000018477	Mito-rich	Mito_GP1	0.95	28.7	27.7	21.3	0	2	567.3	1698.88	1699.88	3	0.0003003	0.1767	54	67	46615	1	6	6	9	0.000647	0.211	possibly correct	TRUE	R	A	TRUE		File Name: S_2-1.raw (F057099)	pep:novel scaffold:cavPor3:scaffold_10:26104234:26115917:1 gene:ENSCPOG00000021886 transcript:ENSCPOT00000026625	Cavia_porcellus.cavPor3.59.pep.fasta
Spectrum28987 scans:10952,	YLPkLITGEYIGALAmSEPNAGSDVVSmK	k4: Acetyl (+42.01), m16: Oxidation (+15.99), m28: Oxidation (+15.99)	ENSCPOP00000018477	Mito-rich	Mito_GP1	0.95	47.5	29.4	41.7	1.92	2	1043.52	3127.54	3128.55	3	-0.002345	-0.7494	152	180	46615	1	6	6	9	0.000647	0.211	possibly correct	TRUE	K	L	TRUE		File Name: S_2-1.raw (F057099)	pep:novel scaffold:cavPor3:scaffold_10:26104234:26115917:1 gene:ENSCPOG00000021886 transcript:ENSCPOT00000026625	Cavia_porcellus.cavPor3.59.pep.fasta
Spectrum34064 scans:6840,	ASAELALGENNEVLkSGR	k15: Acetyl (+42.01)	ENSCPOP00000008228	Mito-rich	Mito_GP1	0.95	0	0	0	4.48	2	950.992	1899.97	1899.98	2	1	-1.377	108	125	47773.7	1	18	21	92	0.00661	0.572	possibly correct	TRUE	K	F	TRUE		File Name: S_2-1.raw (F057099)	pep:novel scaffold:cavPor3:scaffold_22:23562397:23583692:1 gene:ENSCPOG00000009164 transcript:ENSCPOT00000009247	Cavia_porcellus.cavPor3.59.pep.fasta
Spectrum25147 scans:6832,	ASAELALGENNEVLkSGR	k15: Acetyl (+42.01)	ENSCPOP00000008228	Mito-rich	Mito_GP1	0.95	69	28.4	61	6.23	2	950.493	1898.97	1899.98	2	0.001211	0.6376	108	125	47773.7	1	18	21	92	0.00661	0.572	possibly correct	TRUE	K	F	TRUE		File Name: S_2-1.raw (F057099)	pep:novel scaffold:cavPor3:scaffold_22:23562397:23583692:1 gene:ENSCPOG00000009164 transcript:ENSCPOT00000009247	Cavia_porcellus.cavPor3.59.pep.fasta
Spectrum3624 scans:6334,	ASAELALGENNEVLkSGR	k15: Acetyl (+42.01)	ENSCPOP00000008228	Mito-rich	Mito_GP1	0.95	69.8	28.5	66.1	5.82	2	950.493	1898.97	1899.98	2	0.001091	0.5744	108	125	47773.7	1	18	21	92	0.00661	0.572	possibly correct	TRUE	K	F	TRUE		File Name: S_2-1.raw (F057099)	pep:novel scaffold:cavPor3:scaffold_22:23562397:23583692:1 gene:ENSCPOG00000009164 transcript:ENSCPOT00000009247	Cavia_porcellus.cavPor3.59.pep.fasta
Spectrum3628 scans:6339,	ASAELALGENNEVLkSGR	k15: Acetyl (+42.01)	ENSCPOP00000008228	Mito-rich	Mito_GP1	0.95	85	28.5	76.5	6.41	2	950.492	1898.97	1899.98	2	0.0004713	0.2481	108	125	47773.7	1	18	21	92	0.00661	0.572	possibly correct	TRUE	K	F	TRUE		File Name: S_2-1.raw (F057099)	pep:novel scaffold:cavPor3:scaffold_22:23562397:23583692:1 gene:ENSCPOG00000009164 transcript:ENSCPOT00000009247	Cavia_porcellus.cavPor3.59.pep.fasta
Spectrum33982 scans:6750,	ASAELALGENNEVLkSGR	k15: Acetyl (+42.01)	ENSCPOP00000008228	Mito-rich	Mito_GP1	0.95	86.5	28.3	79.1	6.59	2	950.494	1898.97	1899.98	2	0.002551	1.343	108	125	47773.7	1	18	21	92	0.00661	0.572	possibly correct	TRUE	K	F	TRUE		File Name: S_2-1.raw (F057099)	pep:novel scaffold:cavPor3:scaffold_22:23562397:23583692:1 gene:ENSCPOG00000009164 transcript:ENSCPOT00000009247	Cavia_porcellus.cavPor3.59.pep.fasta
Spectrum14102 scans:8163,	DDNGkPYVLPSVR	k5: Acetyl (+42.01)	ENSCPOP00000008228	Mito-rich	Mito_GP1	0.95	31.9	27.4	23.1	1.14	2	751.386	1500.76	1501.76	2	0.0004713	0.3139	69	81	47773.7	1	18	21	92	0.00661	0.572	possibly correct	TRUE	R	K	TRUE		File Name: S_2-1.raw (F057099)	pep:novel scaffold:cavPor3:scaffold_22:23562397:23583692:1 gene:ENSCPOG00000009164 transcript:ENSCPOT00000009247	Cavia_porcellus.cavPor3.59.pep.fasta
Spectrum14247 scans:8316,	DDNGkPYVLPSVR	k5: Acetyl (+42.01)	ENSCPOP00000008228	Mito-rich	Mito_GP1	0.95	34.7	27.4	18.9	1.3	2	751.386	1500.76	1501.76	2	0.0004713	0.3139	69	81	47773.7	1	18	21	92	0.00661	0.572	possibly correct	TRUE	R	K	TRUE		File Name: S_2-1.raw (F057099)	pep:novel scaffold:cavPor3:scaffold_22:23562397:23583692:1 gene:ENSCPOG00000009164 transcript:ENSCPOT00000009247	Cavia_porcellus.cavPor3.59.pep.fasta
Spectrum3809 scans:6534,	DDNGkPYVLPSVR	k5: Acetyl (+42.01)	ENSCPOP00000008228	Mito-rich	Mito_GP1	0.95	40.7	27.5	30.1	1.34	2	751.386	1500.76	1501.76	2	0.0002313	0.154	69	81	47773.7	1	18	21	92	0.00661	0.572	possibly correct	TRUE	R	K	TRUE		File Name: S_2-1.raw (F057099)	pep:novel scaffold:cavPor3:scaffold_22:23562397:23583692:1 gene:ENSCPOG00000009164 transcript:ENSCPOT00000009247	Cavia_porcellus.cavPor3.59.pep.fasta
Spectrum25357 scans:7063,	DDNGkPYVLPSVR	k5: Acetyl (+42.01)	ENSCPOP00000008228	Mito-rich	Mito_GP1	0.95	48.2	27.3	39.3	0.959	2	751.386	1500.76	1501.76	2	-8.653e-06	-0.005762	69	81	47773.7	1	18	21	92	0.00661	0.572	possibly correct	TRUE	R	K	TRUE		File Name: S_2-1.raw (F057099)	pep:novel scaffold:cavPor3:scaffold_22:23562397:23583692:1 gene:ENSCPOG00000009164 transcript:ENSCPOT00000009247	Cavia_porcellus.cavPor3.59.pep.fasta
Spectrum34194 scans:6983,	DDNGkPYVLPSVR	k5: Acetyl (+42.01)	ENSCPOP00000008228	Mito-rich	Mito_GP1	0.95	52.3	27.5	43.2	1.72	2	751.386	1500.76	1501.76	2	0.0001113	0.07414	69	81	47773.7	1	18	21	92	0.00661	0.572	possibly correct	TRUE	R	K	TRUE		File Name: S_2-1.raw (F057099)	pep:novel scaffold:cavPor3:scaffold_22:23562397:23583692:1 gene:ENSCPOG00000009164 transcript:ENSCPOT00000009247	Cavia_porcellus.cavPor3.59.pep.fasta
Spectrum14767 scans:8865,	EFSIYMTkDGR	k8: Acetyl (+42.01)	ENSCPOP00000008228	Mito-rich	Mito_GP1	0.95	42.5	25	34.3	0.854	2	694.83	1387.64	1388.65	2	0.0001713	0.1234	399	409	47773.7	1	18	21	92	0.00661	0.572	possibly correct	TRUE	K	I	TRUE		File Name: S_2-1.raw (F057099)	pep:novel scaffold:cavPor3:scaffold_22:23562397:23583692:1 gene:ENSCPOG00000009164 transcript:ENSCPOT00000009247	Cavia_porcellus.cavPor3.59.pep.fasta
Spectrum3025 scans:5690,	EFSIYmTkDGR	m6: Oxidation (+15.99), k8: Acetyl (+42.01)	ENSCPOP00000008228	Mito-rich	Mito_GP1	0.95	47.4	25	45.1	2.35	2	702.827	1403.64	1404.65	2	0.0003763	0.2679	399	409	47773.7	1	18	21	92	0.00661	0.572	possibly correct	TRUE	K	I	TRUE		File Name: S_2-1.raw (F057099)	pep:novel scaffold:cavPor3:scaffold_22:23562397:23583692:1 gene:ENSCPOG00000009164 transcript:ENSCPOT00000009247	Cavia_porcellus.cavPor3.59.pep.fasta
Spectrum25882 scans:7631,	EFSIYMTkDGR	k8: Acetyl (+42.01)	ENSCPOP00000008228	Mito-rich	Mito_GP1	0.95	48.7	25	45	2.2	2	694.83	1387.64	1388.65	2	0.0005313	0.3826	399	409	47773.7	1	18	21	92	0.00661	0.572	possibly correct	TRUE	K	I	TRUE		File Name: S_2-1.raw (F057099)	pep:novel scaffold:cavPor3:scaffold_22:23562397:23583692:1 gene:ENSCPOG00000009164 transcript:ENSCPOT00000009247	Cavia_porcellus.cavPor3.59.pep.fasta
Spectrum33325 scans:6028,	EFSIYmTkDGR	m6: Oxidation (+15.99), k8: Acetyl (+42.01)	ENSCPOP00000008228	Mito-rich	Mito_GP1	0.95	51.5	25	45.8	1.15	2	702.827	1403.64	1404.65	2	0.0009763	0.6951	399	409	47773.7	1	18	21	92	0.00661	0.572	possibly correct	TRUE	K	I	TRUE		File Name: S_2-1.raw (F057099)	pep:novel scaffold:cavPor3:scaffold_22:23562397:23583692:1 gene:ENSCPOG00000009164 transcript:ENSCPOT00000009247	Cavia_porcellus.cavPor3.59.pep.fasta
Spectrum24618 scans:6249,	EFSIYmTkDGR	m6: Oxidation (+15.99), k8: Acetyl (+42.01)	ENSCPOP00000008228	Mito-rich	Mito_GP1	0.95	51.7	25	49.8	3.21	2	702.827	1403.64	1404.65	2	0.0002563	0.1825	399	409	47773.7	1	18	21	92	0.00661	0.572	possibly correct	TRUE	K	I	TRUE		File Name: S_2-1.raw (F057099)	pep:novel scaffold:cavPor3:scaffold_22:23562397:23583692:1 gene:ENSCPOG00000009164 transcript:ENSCPOT00000009247	Cavia_porcellus.cavPor3.59.pep.fasta
Spectrum3136 scans:5813,	EFSIYmTkDGR	m6: Oxidation (+15.99), k8: Acetyl (+42.01)	ENSCPOP00000008228	Mito-rich	Mito_GP1	0.95	52.2	25	48	2.92	2	702.827	1403.64	1404.65	2	0.0008563	0.6096	399	409	47773.7	1	18	21	92	0.00661	0.572	possibly correct	TRUE	K	I	TRUE		File Name: S_2-1.raw (F057099)	pep:novel scaffold:cavPor3:scaffold_22:23562397:23583692:1 gene:ENSCPOG00000009164 transcript:ENSCPOT00000009247	Cavia_porcellus.cavPor3.59.pep.fasta
Spectrum34700 scans:7536,	EFSIYMTkDGR	k8: Acetyl (+42.01)	ENSCPOP00000008228	Mito-rich	Mito_GP1	0.95	52.7	25	46.9	4.19	2	694.83	1387.64	1388.65	2	0.0005313	0.3826	399	409	47773.7	1	18	21	92	0.00661	0.572	possibly correct	TRUE	K	I	TRUE		File Name: S_2-1.raw (F057099)	pep:novel scaffold:cavPor3:scaffold_22:23562397:23583692:1 gene:ENSCPOG00000009164 transcript:ENSCPOT00000009247	Cavia_porcellus.cavPor3.59.pep.fasta
Spectrum13327 scans:7345,	EFSIYmTkDGR	m6: Oxidation (+15.99), k8: Acetyl (+42.01)	ENSCPOP00000008228	Mito-rich	Mito_GP1	0.95	52.8	25	48.8	2.6	2	702.827	1403.64	1404.65	2	0.0007363	0.5242	399	409	47773.7	1	18	21	92	0.00661	0.572	possibly correct	TRUE	K	I	TRUE		File Name: S_2-1.raw (F057099)	pep:novel scaffold:cavPor3:scaffold_22:23562397:23583692:1 gene:ENSCPOG00000009164 transcript:ENSCPOT00000009247	Cavia_porcellus.cavPor3.59.pep.fasta
Spectrum24504 scans:6124,	EFSIYmTkDGR	m6: Oxidation (+15.99), k8: Acetyl (+42.01)	ENSCPOP00000008228	Mito-rich	Mito_GP1	0.95	56	25	52.5	2.39	2	702.827	1403.64	1404.65	2	0.001096	0.7805	399	409	47773.7	1	18	21	92	0.00661	0.572	possibly correct	TRUE	K	I	TRUE		File Name: S_2-1.raw (F057099)	pep:novel scaffold:cavPor3:scaffold_22:23562397:23583692:1 gene:ENSCPOG00000009164 transcript:ENSCPOT00000009247	Cavia_porcellus.cavPor3.59.pep.fasta
Spectrum4362 scans:7124,	EFSIYMTkDGR	k8: Acetyl (+42.01)	ENSCPOP00000008228	Mito-rich	Mito_GP1	0.95	56.2	25	53.6	4.04	2	694.83	1387.64	1388.65	2	0.0002913	0.2098	399	409	47773.7	1	18	21	92	0.00661	0.572	possibly correct	TRUE	K	I	TRUE		File Name: S_2-1.raw (F057099)	pep:novel scaffold:cavPor3:scaffold_22:23562397:23583692:1 gene:ENSCPOG00000009164 transcript:ENSCPOT00000009247	Cavia_porcellus.cavPor3.59.pep.fasta
Spectrum33438 scans:6151,	EFSIYmTkDGR	m6: Oxidation (+15.99), k8: Acetyl (+42.01)	ENSCPOP00000008228	Mito-rich	Mito_GP1	0.95	56.7	25	54.2	3.55	2	702.827	1403.64	1404.65	2	0.0006163	0.4388	399	409	47773.7	1	18	21	92	0.00661	0.572	possibly correct	TRUE	K	I	TRUE		File Name: S_2-1.raw (F057099)	pep:novel scaffold:cavPor3:scaffold_22:23562397:23583692:1 gene:ENSCPOG00000009164 transcript:ENSCPOT00000009247	Cavia_porcellus.cavPor3.59.pep.fasta
Spectrum13174 scans:7182,	EFSIYmTkDGR	m6: Oxidation (+15.99), k8: Acetyl (+42.01)	ENSCPOP00000008228	Mito-rich	Mito_GP1	0.95	63.7	25	60.2	2.6	2	702.827	1403.64	1404.65	2	0.0002563	0.1825	399	409	47773.7	1	18	21	92	0.00661	0.572	possibly correct	TRUE	K	I	TRUE		File Name: S_2-1.raw (F057099)	pep:novel scaffold:cavPor3:scaffold_22:23562397:23583692:1 gene:ENSCPOG00000009164 transcript:ENSCPOT00000009247	Cavia_porcellus.cavPor3.59.pep.fasta
Spectrum28294 scans:10215,	EGSSHNWQHITDQIGmFcFTGLkPEQVER	m16: Oxidation (+15.99), c18: Carbamidomethyl (+57.02), k23: Acetyl (+42.01)	ENSCPOP00000008228	Mito-rich	Mito_GP1	0.95	0	0	0	3.66	2	873.406	3489.59	3489.6	4	1.007	1.172	367	395	47773.7	1	18	21	92	0.00661	0.572	possibly correct	TRUE	K	L	TRUE		File Name: S_2-1.raw (F057099)	pep:novel scaffold:cavPor3:scaffold_22:23562397:23583692:1 gene:ENSCPOG00000009164 transcript:ENSCPOT00000009247	Cavia_porcellus.cavPor3.59.pep.fasta
Spectrum708 scans:2776,	EIASVVkK	k7: Acetyl (+42.01)	ENSCPOP00000008228	Mito-rich	Mito_GP1	0.95	28	25.2	9.88	0.319	2	458.279	914.544	915.551	2	0.0004313	0.4711	230	237	47773.7	1	18	21	92	0.00661	0.572	possibly correct	TRUE	K	K	TRUE		File Name: S_2-1.raw (F057099)	pep:novel scaffold:cavPor3:scaffold_22:23562397:23583692:1 gene:ENSCPOG00000009164 transcript:ENSCPOT00000009247	Cavia_porcellus.cavPor3.59.pep.fasta
Spectrum21910 scans:2870,	EIASVVkK	k7: Acetyl (+42.01)	ENSCPOP00000008228	Mito-rich	Mito_GP1	0.95	31	25.2	4.61	-0.0792	2	458.279	914.544	915.551	2	0.0002513	0.2745	230	237	47773.7	1	18	21	92	0.00661	0.572	possibly correct	TRUE	K	K	TRUE		File Name: S_2-1.raw (F057099)	pep:novel scaffold:cavPor3:scaffold_22:23562397:23583692:1 gene:ENSCPOG00000009164 transcript:ENSCPOT00000009247	Cavia_porcellus.cavPor3.59.pep.fasta
Spectrum30790 scans:2808,	EIASVVkK	k7: Acetyl (+42.01)	ENSCPOP00000008228	Mito-rich	Mito_GP1	0.95	42.6	25.2	15.3	-0.114	2	458.279	914.544	915.551	2	0.0001313	0.1435	230	237	47773.7	1	18	21	92	0.00661	0.572	possibly correct	TRUE	K	K	TRUE		File Name: S_2-1.raw (F057099)	pep:novel scaffold:cavPor3:scaffold_22:23562397:23583692:1 gene:ENSCPOG00000009164 transcript:ENSCPOT00000009247	Cavia_porcellus.cavPor3.59.pep.fasta
Spectrum37158 scans:10187,	ISVAGVTSGNVGYLAHAIHQVTk	k23: Acetyl (+42.01)	ENSCPOP00000008228	Mito-rich	Mito_GP1	0.95	31	28.2	24.8	0.638	2	788.761	2363.26	2364.27	3	0.002385	1.009	410	432	47773.7	1	18	21	92	0.00661	0.572	possibly correct	TRUE	R	-	TRUE		File Name: S_2-1.raw (F057099)	pep:novel scaffold:cavPor3:scaffold_22:23562397:23583692:1 gene:ENSCPOG00000009164 transcript:ENSCPOT00000009247	Cavia_porcellus.cavPor3.59.pep.fasta
Spectrum6648 scans:9556,	ISVAGVTSGNVGYLAHAIHQVTk	k23: Acetyl (+42.01)	ENSCPOP00000008228	Mito-rich	Mito_GP1	0.95	35.8	28.2	35.5	-0.176	2	788.761	2363.26	2364.27	3	0.002205	0.9328	410	432	47773.7	1	18	21	92	0.00661	0.572	possibly correct	TRUE	R	-	TRUE		File Name: S_2-1.raw (F057099)	pep:novel scaffold:cavPor3:scaffold_22:23562397:23583692:1 gene:ENSCPOG00000009164 transcript:ENSCPOT00000009247	Cavia_porcellus.cavPor3.59.pep.fasta
Spectrum30533 scans:2365,	KAEAQLAAkNVDK	k9: Acetyl (+42.01)	ENSCPOP00000008228	Mito-rich	Mito_GP1	0.95	16.8	27.7	5.63	1.52	2	476.6	1426.78	1427.79	3	0.0003353	0.2349	82	94	47773.7	1	18	21	92	0.00661	0.572	possibly correct	TRUE	R	E	TRUE		File Name: S_2-1.raw (F057099)	pep:novel scaffold:cavPor3:scaffold_22:23562397:23583692:1 gene:ENSCPOG00000009164 transcript:ENSCPOT00000009247	Cavia_porcellus.cavPor3.59.pep.fasta
Spectrum531 scans:2449,	KAEAQLAAkNVDK	k9: Acetyl (+42.01)	ENSCPOP00000008228	Mito-rich	Mito_GP1	0.95	26.8	28	14.9	0.745	2	476.6	1426.78	1427.79	3	-0.0004147	-0.2904	82	94	47773.7	1	18	21	92	0.00661	0.572	possibly correct	TRUE	R	E	TRUE		File Name: S_2-1.raw (F057099)	pep:novel scaffold:cavPor3:scaffold_22:23562397:23583692:1 gene:ENSCPOG00000009164 transcript:ENSCPOT00000009247	Cavia_porcellus.cavPor3.59.pep.fasta
Spectrum30548 scans:2389,	KAEAQLAAkNVDK	k9: Acetyl (+42.01)	ENSCPOP00000008228	Mito-rich	Mito_GP1	0.95	30.1	27.6	11.3	1.09	2	476.6	1426.78	1427.79	3	0.0004253	0.2979	82	94	47773.7	1	18	21	92	0.00661	0.572	possibly correct	TRUE	R	E	TRUE		File Name: S_2-1.raw (F057099)	pep:novel scaffold:cavPor3:scaffold_22:23562397:23583692:1 gene:ENSCPOG00000009164 transcript:ENSCPOT00000009247	Cavia_porcellus.cavPor3.59.pep.fasta
Spectrum9434 scans:3026,	KAEAQLAAkNVDK	k9: Acetyl (+42.01)	ENSCPOP00000008228	Mito-rich	Mito_GP1	0.95	42	27.9	22	2.89	2	714.395	1426.78	1427.79	2	-0.002049	-1.435	82	94	47773.7	1	18	21	92	0.00661	0.572	possibly correct	TRUE	R	E	TRUE		File Name: S_2-1.raw (F057099)	pep:novel scaffold:cavPor3:scaffold_22:23562397:23583692:1 gene:ENSCPOG00000009164 transcript:ENSCPOT00000009247	Cavia_porcellus.cavPor3.59.pep.fasta
Spectrum6328 scans:9219,	KAEAQLAAkNVDKEYLPIAGLAEFcK	k9: Acetyl (+42.01), c25: Carbamidomethyl (+57.02)	ENSCPOP00000008228	Mito-rich	Mito_GP1	0.914	28.5	29.5	0.9	0	2	730.638	2918.52	2919.53	4	0.002874	0.9844	82	107	47773.7	1	18	21	92	0.00661	0.572	possibly correct	TRUE	R	A	TRUE		File Name: S_2-1.raw (F057099)	pep:novel scaffold:cavPor3:scaffold_22:23562397:23583692:1 gene:ENSCPOG00000009164 transcript:ENSCPOT00000009247	Cavia_porcellus.cavPor3.59.pep.fasta
Spectrum28025 scans:9932,	KAEAQLAAkNVDKEYLPIAGLAEFcK	k9: Acetyl (+42.01), c25: Carbamidomethyl (+57.02)	ENSCPOP00000008228	Mito-rich	Mito_GP1	0.95	33	29.4	6.51	0	2	730.638	2918.52	2919.53	4	0.001394	0.4775	82	107	47773.7	1	18	21	92	0.00661	0.572	possibly correct	TRUE	R	A	TRUE		File Name: S_2-1.raw (F057099)	pep:novel scaffold:cavPor3:scaffold_22:23562397:23583692:1 gene:ENSCPOG00000009164 transcript:ENSCPOT00000009247	Cavia_porcellus.cavPor3.59.pep.fasta
Spectrum36815 scans:9822,	KAEAQLAAkNVDKEYLPIAGLAEFcK	k9: Acetyl (+42.01), c25: Carbamidomethyl (+57.02)	ENSCPOP00000008228	Mito-rich	Mito_GP1	0.95	41.8	29.5	5.04	0	2	730.638	2918.52	2919.53	4	0.000914	0.3131	82	107	47773.7	1	18	21	92	0.00661	0.572	possibly correct	TRUE	R	A	TRUE		File Name: S_2-1.raw (F057099)	pep:novel scaffold:cavPor3:scaffold_22:23562397:23583692:1 gene:ENSCPOG00000009164 transcript:ENSCPOT00000009247	Cavia_porcellus.cavPor3.59.pep.fasta
Spectrum26723 scans:8550,	KQWLQEVkGMADR	k8: Acetyl (+42.01)	ENSCPOP00000008228	Mito-rich	Mito_GP1	0.95	25.9	28	19.3	1.32	2	544.284	1629.83	1630.84	3	-0.001055	-0.6467	340	352	47773.7	1	18	21	92	0.00661	0.572	possibly correct	TRUE	R	I	TRUE		File Name: S_2-1.raw (F057099)	pep:novel scaffold:cavPor3:scaffold_22:23562397:23583692:1 gene:ENSCPOG00000009164 transcript:ENSCPOT00000009247	Cavia_porcellus.cavPor3.59.pep.fasta
Spectrum35513 scans:8438,	KQWLQEVkGMADR	k8: Acetyl (+42.01)	ENSCPOP00000008228	Mito-rich	Mito_GP1	0.95	37.5	28	36.4	0.745	2	544.284	1629.83	1630.84	3	0.001675	1.027	340	352	47773.7	1	18	21	92	0.00661	0.572	possibly correct	TRUE	R	I	TRUE		File Name: S_2-1.raw (F057099)	pep:novel scaffold:cavPor3:scaffold_22:23562397:23583692:1 gene:ENSCPOG00000009164 transcript:ENSCPOT00000009247	Cavia_porcellus.cavPor3.59.pep.fasta
Spectrum34198 scans:6987,	LTkEFSIYmTK	k3: Acetyl (+42.01), m9: Oxidation (+15.99)	ENSCPOP00000008228	Mito-rich	Mito_GP1	0.95	43.4	27.5	39.6	3.31	2	709.866	1417.72	1418.72	2	0.0006763	0.4767	396	406	47773.7	1	18	21	92	0.00661	0.572	possibly correct	TRUE	R	D	TRUE		File Name: S_2-1.raw (F057099)	pep:novel scaffold:cavPor3:scaffold_22:23562397:23583692:1 gene:ENSCPOG00000009164 transcript:ENSCPOT00000009247	Cavia_porcellus.cavPor3.59.pep.fasta
Spectrum25365 scans:7071,	LTkEFSIYmTK	k3: Acetyl (+42.01), m9: Oxidation (+15.99)	ENSCPOP00000008228	Mito-rich	Mito_GP1	0.95	44.4	27.5	41.2	2.44	2	709.866	1417.72	1418.72	2	0.0004363	0.3076	396	406	47773.7	1	18	21	92	0.00661	0.572	possibly correct	TRUE	R	D	TRUE		File Name: S_2-1.raw (F057099)	pep:novel scaffold:cavPor3:scaffold_22:23562397:23583692:1 gene:ENSCPOG00000009164 transcript:ENSCPOT00000009247	Cavia_porcellus.cavPor3.59.pep.fasta
Spectrum3870 scans:6599,	LTkEFSIYmTK	k3: Acetyl (+42.01), m9: Oxidation (+15.99)	ENSCPOP00000008228	Mito-rich	Mito_GP1	0.95	59.5	27.7	54.8	3.59	2	709.865	1417.72	1418.72	2	-0.0004037	-0.2845	396	406	47773.7	1	18	21	92	0.00661	0.572	possibly correct	TRUE	R	D	TRUE		File Name: S_2-1.raw (F057099)	pep:novel scaffold:cavPor3:scaffold_22:23562397:23583692:1 gene:ENSCPOG00000009164 transcript:ENSCPOT00000009247	Cavia_porcellus.cavPor3.59.pep.fasta
Spectrum14225 scans:8292,	LTkEFSIYmTK	k3: Acetyl (+42.01), m9: Oxidation (+15.99)	ENSCPOP00000008228	Mito-rich	Mito_GP1	0.95	63.1	27.6	53.2	2.19	2	709.865	1417.72	1418.72	2	-0.001024	-0.7215	396	406	47773.7	1	18	21	92	0.00661	0.572	possibly correct	TRUE	R	D	TRUE		File Name: S_2-1.raw (F057099)	pep:novel scaffold:cavPor3:scaffold_22:23562397:23583692:1 gene:ENSCPOG00000009164 transcript:ENSCPOT00000009247	Cavia_porcellus.cavPor3.59.pep.fasta
Spectrum5296 scans:8129,	MNLGVGAYRDDNGkPYVLPSVR	k14: Acetyl (+42.01)	ENSCPOP00000008228	Mito-rich	Mito_GP1	0.95	23.7	28.9	18.3	1.68	2	821.754	2462.24	2463.25	3	0.003505	1.423	60	81	47773.7	1	18	21	92	0.00661	0.572	possibly correct	TRUE	K	K	TRUE		File Name: S_2-1.raw (F057099)	pep:novel scaffold:cavPor3:scaffold_22:23562397:23583692:1 gene:ENSCPOG00000009164 transcript:ENSCPOT00000009247	Cavia_porcellus.cavPor3.59.pep.fasta
Spectrum4468 scans:7238,	mNLGVGAYRDDNGkPYVLPSVR	m1: Oxidation (+15.99), k14: Acetyl (+42.01)	ENSCPOP00000008228	Mito-rich	Mito_GP1	0.95	30.3	28.6	21.2	0.469	2	827.085	2478.23	2479.24	3	0.00102	0.4116	60	81	47773.7	1	18	21	92	0.00661	0.572	possibly correct	TRUE	K	K	TRUE		File Name: S_2-1.raw (F057099)	pep:novel scaffold:cavPor3:scaffold_22:23562397:23583692:1 gene:ENSCPOG00000009164 transcript:ENSCPOT00000009247	Cavia_porcellus.cavPor3.59.pep.fasta
Spectrum26003 scans:7764,	mNLGVGAYRDDNGkPYVLPSVR	m1: Oxidation (+15.99), k14: Acetyl (+42.01)	ENSCPOP00000008228	Mito-rich	Mito_GP1	0.95	33.7	28.6	19	0.538	2	827.086	2478.24	2479.24	3	0.0036	1.452	60	81	47773.7	1	18	21	92	0.00661	0.572	possibly correct	TRUE	K	K	TRUE		File Name: S_2-1.raw (F057099)	pep:novel scaffold:cavPor3:scaffold_22:23562397:23583692:1 gene:ENSCPOG00000009164 transcript:ENSCPOT00000009247	Cavia_porcellus.cavPor3.59.pep.fasta
Spectrum34822 scans:7674,	mNLGVGAYRDDNGkPYVLPSVR	m1: Oxidation (+15.99), k14: Acetyl (+42.01)	ENSCPOP00000008228	Mito-rich	Mito_GP1	0.95	42.6	28.5	30.4	1.74	2	827.086	2478.24	2479.24	3	0.00231	0.9319	60	81	47773.7	1	18	21	92	0.00661	0.572	possibly correct	TRUE	K	K	TRUE		File Name: S_2-1.raw (F057099)	pep:novel scaffold:cavPor3:scaffold_22:23562397:23583692:1 gene:ENSCPOG00000009164 transcript:ENSCPOT00000009247	Cavia_porcellus.cavPor3.59.pep.fasta
Spectrum14972 scans:9082,	mNLGVGAYRDDNGkPYVLPSVR	m1: Oxidation (+15.99), k14: Acetyl (+42.01)	ENSCPOP00000008228	Mito-rich	Mito_GP1	0.95	48.4	28.6	37.2	2.49	2	827.085	2478.23	2479.24	3	0.00102	0.4116	60	81	47773.7	1	18	21	92	0.00661	0.572	possibly correct	TRUE	K	K	TRUE		File Name: S_2-1.raw (F057099)	pep:novel scaffold:cavPor3:scaffold_22:23562397:23583692:1 gene:ENSCPOG00000009164 transcript:ENSCPOT00000009247	Cavia_porcellus.cavPor3.59.pep.fasta
Spectrum26110 scans:7883,	mNLGVGAYRDDNGkPYVLPSVR	m1: Oxidation (+15.99), k14: Acetyl (+42.01)	ENSCPOP00000008228	Mito-rich	Mito_GP1	0.95	53.1	28.5	45.5	1.59	2	827.086	2478.24	2479.24	3	0.00249	1.004	60	81	47773.7	1	18	21	92	0.00661	0.572	possibly correct	TRUE	K	K	TRUE		File Name: S_2-1.raw (F057099)	pep:novel scaffold:cavPor3:scaffold_22:23562397:23583692:1 gene:ENSCPOG00000009164 transcript:ENSCPOT00000009247	Cavia_porcellus.cavPor3.59.pep.fasta
Spectrum34827 scans:7680,	mNLGVGAYRDDNGkPYVLPSVR	m1: Oxidation (+15.99), k14: Acetyl (+42.01)	ENSCPOP00000008228	Mito-rich	Mito_GP1	0.95	57.2	28.5	49.2	1.37	2	827.086	2478.24	2479.24	3	0.00249	1.004	60	81	47773.7	1	18	21	92	0.00661	0.572	possibly correct	TRUE	K	K	TRUE		File Name: S_2-1.raw (F057099)	pep:novel scaffold:cavPor3:scaffold_22:23562397:23583692:1 gene:ENSCPOG00000009164 transcript:ENSCPOT00000009247	Cavia_porcellus.cavPor3.59.pep.fasta
Spectrum35981 scans:8942,	QEQWkEIASVVK	k5: Acetyl (+42.01)	ENSCPOP00000008228	Mito-rich	Mito_GP1	0.95	57.7	27.8	47.1	2.42	2	743.899	1485.78	1486.79	2	0.001431	0.9627	225	236	47773.7	1	18	21	92	0.00661	0.572	possibly correct	TRUE	R	K	TRUE		File Name: S_2-1.raw (F057099)	pep:novel scaffold:cavPor3:scaffold_22:23562397:23583692:1 gene:ENSCPOG00000009164 transcript:ENSCPOT00000009247	Cavia_porcellus.cavPor3.59.pep.fasta
Spectrum27190 scans:9051,	QEQWkEIASVVK	k5: Acetyl (+42.01)	ENSCPOP00000008228	Mito-rich	Mito_GP1	0.95	63.2	27.8	51.5	2.37	2	743.9	1485.78	1486.79	2	0.002051	1.38	225	236	47773.7	1	18	21	92	0.00661	0.572	possibly correct	TRUE	R	K	TRUE		File Name: S_2-1.raw (F057099)	pep:novel scaffold:cavPor3:scaffold_22:23562397:23583692:1 gene:ENSCPOG00000009164 transcript:ENSCPOT00000009247	Cavia_porcellus.cavPor3.59.pep.fasta
Spectrum5589 scans:8441,	QEQWkEIASVVK	k5: Acetyl (+42.01)	ENSCPOP00000008228	Mito-rich	Mito_GP1	0.95	65	27.8	57.1	2.26	2	743.899	1485.78	1486.79	2	0.001311	0.882	225	236	47773.7	1	18	21	92	0.00661	0.572	possibly correct	TRUE	R	K	TRUE		File Name: S_2-1.raw (F057099)	pep:novel scaffold:cavPor3:scaffold_22:23562397:23583692:1 gene:ENSCPOG00000009164 transcript:ENSCPOT00000009247	Cavia_porcellus.cavPor3.59.pep.fasta
Spectrum34891 scans:7751,	RVESQLkILIRPmYSNPPINGAR	k7: Acetyl (+42.01), m13: Oxidation (+15.99)	ENSCPOP00000008228	Mito-rich	Mito_GP1	0.95	28.9	27.1	18.8	0.585	2	678.376	2709.48	2710.48	4	0.0004843	0.1787	305	327	47773.7	1	18	21	92	0.00661	0.572	possibly correct	TRUE	K	I	TRUE		File Name: S_2-1.raw (F057099)	pep:novel scaffold:cavPor3:scaffold_22:23562397:23583692:1 gene:ENSCPOG00000009164 transcript:ENSCPOT00000009247	Cavia_porcellus.cavPor3.59.pep.fasta
Spectrum15006 scans:9118,	RVESQLkILIRPmYSNPPINGAR	k7: Acetyl (+42.01), m13: Oxidation (+15.99)	ENSCPOP00000008228	Mito-rich	Mito_GP1	0.95	31	27.1	18.8	0.276	2	678.376	2709.48	2710.48	4	4.338e-06	0.001601	305	327	47773.7	1	18	21	92	0.00661	0.572	possibly correct	TRUE	K	I	TRUE		File Name: S_2-1.raw (F057099)	pep:novel scaffold:cavPor3:scaffold_22:23562397:23583692:1 gene:ENSCPOG00000009164 transcript:ENSCPOT00000009247	Cavia_porcellus.cavPor3.59.pep.fasta
Spectrum26075 scans:7844,	RVESQLkILIRPmYSNPPINGAR	k7: Acetyl (+42.01), m13: Oxidation (+15.99)	ENSCPOP00000008228	Mito-rich	Mito_GP1	0.95	33.3	27.1	31.3	0.585	2	678.376	2709.47	2710.48	4	-0.0004757	-0.1755	305	327	47773.7	1	18	21	92	0.00661	0.572	possibly correct	TRUE	K	I	TRUE		File Name: S_2-1.raw (F057099)	pep:novel scaffold:cavPor3:scaffold_22:23562397:23583692:1 gene:ENSCPOG00000009164 transcript:ENSCPOT00000009247	Cavia_porcellus.cavPor3.59.pep.fasta
Spectrum34867 scans:7724,	RVESQLkILIRPmYSNPPINGAR	k7: Acetyl (+42.01), m13: Oxidation (+15.99)	ENSCPOP00000008228	Mito-rich	Mito_GP1	0.95	38.6	27	26.8	0.62	2	678.377	2709.48	2710.48	4	0.002204	0.8133	305	327	47773.7	1	18	21	92	0.00661	0.572	possibly correct	TRUE	K	I	TRUE		File Name: S_2-1.raw (F057099)	pep:novel scaffold:cavPor3:scaffold_22:23562397:23583692:1 gene:ENSCPOG00000009164 transcript:ENSCPOT00000009247	Cavia_porcellus.cavPor3.59.pep.fasta
Spectrum29012 scans:10978,	TcGFDFTGAmEDISkIPEQSIILLHAcAHNPTGVDPR	c2: Carbamidomethyl (+57.02), m10: Oxidation (+15.99), k15: Acetyl (+42.01), c27: Carbamidomethyl (+57.02)	ENSCPOP00000008228	Mito-rich	Mito_GP1	0.943	27.4	27	24.1	0	2	1039.74	4154.95	4155.96	4	-0.0006863	-0.1651	188	224	47773.7	1	18	21	92	0.00661	0.572	possibly correct	TRUE	K	Q	TRUE		File Name: S_2-1.raw (F057099)	pep:novel scaffold:cavPor3:scaffold_22:23562397:23583692:1 gene:ENSCPOG00000009164 transcript:ENSCPOT00000009247	Cavia_porcellus.cavPor3.59.pep.fasta
Spectrum22721 scans:4009,	TQLVSNLkK	k8: Acetyl (+42.01)	ENSCPOP00000008228	Mito-rich	Mito_GP1	0.95	24.1	25.4	7.09	0.444	2	536.822	1071.63	1072.64	2	-0.0001887	-0.1759	358	366	47773.7	1	18	21	92	0.00661	0.572	possibly correct	TRUE	R	E	TRUE		File Name: S_2-1.raw (F057099)	pep:novel scaffold:cavPor3:scaffold_22:23562397:23583692:1 gene:ENSCPOG00000009164 transcript:ENSCPOT00000009247	Cavia_porcellus.cavPor3.59.pep.fasta
Spectrum11207 scans:5086,	TQLVSNLkK	k8: Acetyl (+42.01)	ENSCPOP00000008228	Mito-rich	Mito_GP1	0.95	24.1	25.4	7.09	0.854	2	536.822	1071.63	1072.64	2	-0.0001887	-0.1759	358	366	47773.7	1	18	21	92	0.00661	0.572	possibly correct	TRUE	R	E	TRUE		File Name: S_2-1.raw (F057099)	pep:novel scaffold:cavPor3:scaffold_22:23562397:23583692:1 gene:ENSCPOG00000009164 transcript:ENSCPOT00000009247	Cavia_porcellus.cavPor3.59.pep.fasta
Spectrum1440 scans:3872,	TQLVSNLkK	k8: Acetyl (+42.01)	ENSCPOP00000008228	Mito-rich	Mito_GP1	0.95	24.3	25.4	3.49	0.387	2	536.822	1071.63	1072.64	2	-0.0005487	-0.5115	358	366	47773.7	1	18	21	92	0.00661	0.572	possibly correct	TRUE	R	E	TRUE		File Name: S_2-1.raw (F057099)	pep:novel scaffold:cavPor3:scaffold_22:23562397:23583692:1 gene:ENSCPOG00000009164 transcript:ENSCPOT00000009247	Cavia_porcellus.cavPor3.59.pep.fasta
Spectrum31548 scans:3912,	TQLVSNLkK	k8: Acetyl (+42.01)	ENSCPOP00000008228	Mito-rich	Mito_GP1	0.95	24.5	25.4	7.86	1.22	2	536.822	1071.63	1072.64	2	7.135e-05	0.06652	358	366	47773.7	1	18	21	92	0.00661	0.572	possibly correct	TRUE	R	E	TRUE		File Name: S_2-1.raw (F057099)	pep:novel scaffold:cavPor3:scaffold_22:23562397:23583692:1 gene:ENSCPOG00000009164 transcript:ENSCPOT00000009247	Cavia_porcellus.cavPor3.59.pep.fasta
Spectrum5360 scans:8197,	VESQLkILIRPmYSNPPINGAR	k6: Acetyl (+42.01), m12: Oxidation (+15.99)	ENSCPOP00000008228	Mito-rich	Mito_GP1	0.95	29.3	28.1	26.9	1.15	2	852.133	2553.38	2554.38	3	0.00175	0.6852	306	327	47773.7	1	18	21	92	0.00661	0.572	possibly correct	TRUE	R	I	TRUE		File Name: S_2-1.raw (F057099)	pep:novel scaffold:cavPor3:scaffold_22:23562397:23583692:1 gene:ENSCPOG00000009164 transcript:ENSCPOT00000009247	Cavia_porcellus.cavPor3.59.pep.fasta
Spectrum6320 scans:9210,	VESQLkILIRPMYSNPPINGAR	k6: Acetyl (+42.01)	ENSCPOP00000008228	Mito-rich	Mito_GP1	0.95	30	27.5	27.5	1.55	2	846.8	2537.38	2538.39	3	-0.001255	-0.4943	306	327	47773.7	1	18	21	92	0.00661	0.572	possibly correct	TRUE	R	I	TRUE		File Name: S_2-1.raw (F057099)	pep:novel scaffold:cavPor3:scaffold_22:23562397:23583692:1 gene:ENSCPOG00000009164 transcript:ENSCPOT00000009247	Cavia_porcellus.cavPor3.59.pep.fasta
Spectrum26884 scans:8723,	VESQLkILIRPmYSNPPINGAR	k6: Acetyl (+42.01), m12: Oxidation (+15.99)	ENSCPOP00000008228	Mito-rich	Mito_GP1	0.95	31.5	28.1	22.1	2.1	2	852.132	2553.37	2554.38	3	-0.00101	-0.3953	306	327	47773.7	1	18	21	92	0.00661	0.572	possibly correct	TRUE	R	I	TRUE		File Name: S_2-1.raw (F057099)	pep:novel scaffold:cavPor3:scaffold_22:23562397:23583692:1 gene:ENSCPOG00000009164 transcript:ENSCPOT00000009247	Cavia_porcellus.cavPor3.59.pep.fasta
Spectrum5165 scans:7989,	VESQLkILIRPmYSNPPINGAR	k6: Acetyl (+42.01), m12: Oxidation (+15.99)	ENSCPOP00000008228	Mito-rich	Mito_GP1	0.95	32.2	28.1	26.9	0.268	2	852.132	2553.38	2554.38	3	0.00136	0.5326	306	327	47773.7	1	18	21	92	0.00661	0.572	possibly correct	TRUE	R	I	TRUE		File Name: S_2-1.raw (F057099)	pep:novel scaffold:cavPor3:scaffold_22:23562397:23583692:1 gene:ENSCPOG00000009164 transcript:ENSCPOT00000009247	Cavia_porcellus.cavPor3.59.pep.fasta
Spectrum15764 scans:9917,	VESQLkILIRPmYSNPPINGAR	k6: Acetyl (+42.01), m12: Oxidation (+15.99)	ENSCPOP00000008228	Mito-rich	Mito_GP1	0.95	32.3	28.2	23.7	2.7	2	852.133	2553.38	2554.38	3	0.00247	0.9671	306	327	47773.7	1	18	21	92	0.00661	0.572	possibly correct	TRUE	R	I	TRUE		File Name: S_2-1.raw (F057099)	pep:novel scaffold:cavPor3:scaffold_22:23562397:23583692:1 gene:ENSCPOG00000009164 transcript:ENSCPOT00000009247	Cavia_porcellus.cavPor3.59.pep.fasta
Spectrum26847 scans:8683,	VESQLkILIRPmYSNPPINGAR	k6: Acetyl (+42.01), m12: Oxidation (+15.99)	ENSCPOP00000008228	Mito-rich	Mito_GP1	0.95	37	28.1	26	2.43	2	852.132	2553.38	2554.38	3	0.00118	0.4621	306	327	47773.7	1	18	21	92	0.00661	0.572	possibly correct	TRUE	R	I	TRUE		File Name: S_2-1.raw (F057099)	pep:novel scaffold:cavPor3:scaffold_22:23562397:23583692:1 gene:ENSCPOG00000009164 transcript:ENSCPOT00000009247	Cavia_porcellus.cavPor3.59.pep.fasta
Spectrum26732 scans:8560,	VESQLkILIRPmYSNPPINGAR	k6: Acetyl (+42.01), m12: Oxidation (+15.99)	ENSCPOP00000008228	Mito-rich	Mito_GP1	0.95	37.1	28.2	31	1.59	2	852.132	2553.37	2554.38	3	0.0001003	0.03928	306	327	47773.7	1	18	21	92	0.00661	0.572	possibly correct	TRUE	R	I	TRUE		File Name: S_2-1.raw (F057099)	pep:novel scaffold:cavPor3:scaffold_22:23562397:23583692:1 gene:ENSCPOG00000009164 transcript:ENSCPOT00000009247	Cavia_porcellus.cavPor3.59.pep.fasta
Spectrum35522 scans:8448,	VESQLkILIRPmYSNPPINGAR	k6: Acetyl (+42.01), m12: Oxidation (+15.99)	ENSCPOP00000008228	Mito-rich	Mito_GP1	0.95	39.1	27.9	28.1	1.23	2	852.134	2553.38	2554.38	3	0.00613	2.4	306	327	47773.7	1	18	21	92	0.00661	0.572	possibly correct	TRUE	R	I	TRUE		File Name: S_2-1.raw (F057099)	pep:novel scaffold:cavPor3:scaffold_22:23562397:23583692:1 gene:ENSCPOG00000009164 transcript:ENSCPOT00000009247	Cavia_porcellus.cavPor3.59.pep.fasta
Spectrum5170 scans:7995,	VESQLkILIRPmYSNPPINGAR	k6: Acetyl (+42.01), m12: Oxidation (+15.99)	ENSCPOP00000008228	Mito-rich	Mito_GP1	0.95	40.5	28.1	31.3	1.92	2	852.133	2553.38	2554.38	3	0.00322	1.261	306	327	47773.7	1	18	21	92	0.00661	0.572	possibly correct	TRUE	R	I	TRUE		File Name: S_2-1.raw (F057099)	pep:novel scaffold:cavPor3:scaffold_22:23562397:23583692:1 gene:ENSCPOG00000009164 transcript:ENSCPOT00000009247	Cavia_porcellus.cavPor3.59.pep.fasta
Spectrum5290 scans:8123,	VESQLkILIRPmYSNPPINGAR	k6: Acetyl (+42.01), m12: Oxidation (+15.99)	ENSCPOP00000008228	Mito-rich	Mito_GP1	0.95	42	28.1	32.8	2.42	2	852.132	2553.38	2554.38	3	0.00136	0.5326	306	327	47773.7	1	18	21	92	0.00661	0.572	possibly correct	TRUE	R	I	TRUE		File Name: S_2-1.raw (F057099)	pep:novel scaffold:cavPor3:scaffold_22:23562397:23583692:1 gene:ENSCPOG00000009164 transcript:ENSCPOT00000009247	Cavia_porcellus.cavPor3.59.pep.fasta
Spectrum15897 scans:10057,	VESQLkILIRPmYSNPPINGAR	k6: Acetyl (+42.01), m12: Oxidation (+15.99)	ENSCPOP00000008228	Mito-rich	Mito_GP1	0.95	42.2	28.1	35	1.85	2	852.133	2553.38	2554.38	3	0.00157	0.6148	306	327	47773.7	1	18	21	92	0.00661	0.572	possibly correct	TRUE	R	I	TRUE		File Name: S_2-1.raw (F057099)	pep:novel scaffold:cavPor3:scaffold_22:23562397:23583692:1 gene:ENSCPOG00000009164 transcript:ENSCPOT00000009247	Cavia_porcellus.cavPor3.59.pep.fasta
Spectrum35538 scans:8466,	VESQLkILIRPmYSNPPINGAR	k6: Acetyl (+42.01), m12: Oxidation (+15.99)	ENSCPOP00000008228	Mito-rich	Mito_GP1	0.95	47.4	28.1	32	1.43	2	852.132	2553.37	2554.38	3	0.0008203	0.3211	306	327	47773.7	1	18	21	92	0.00661	0.572	possibly correct	TRUE	R	I	TRUE		File Name: S_2-1.raw (F057099)	pep:novel scaffold:cavPor3:scaffold_22:23562397:23583692:1 gene:ENSCPOG00000009164 transcript:ENSCPOT00000009247	Cavia_porcellus.cavPor3.59.pep.fasta
Spectrum35666 scans:8602,	VESQLkILIRPmYSNPPINGAR	k6: Acetyl (+42.01), m12: Oxidation (+15.99)	ENSCPOP00000008228	Mito-rich	Mito_GP1	0.95	48.1	28.1	40.1	3.68	2	852.132	2553.38	2554.38	3	0.00118	0.4621	306	327	47773.7	1	18	21	92	0.00661	0.572	possibly correct	TRUE	R	I	TRUE		File Name: S_2-1.raw (F057099)	pep:novel scaffold:cavPor3:scaffold_22:23562397:23583692:1 gene:ENSCPOG00000009164 transcript:ENSCPOT00000009247	Cavia_porcellus.cavPor3.59.pep.fasta
Spectrum4480 scans:7251,	VGAFTVIckDADEAK	c8: Carbamidomethyl (+57.02), k9: Acetyl (+42.01)	ENSCPOP00000008228	Mito-rich	Mito_GP1	0.95	29.4	26.6	16.1	0.602	2	833.412	1664.81	1665.82	2	0.000966	0.5799	290	304	47773.7	1	18	21	92	0.00661	0.572	possibly correct	TRUE	R	R	TRUE		File Name: S_2-1.raw (F057099)	pep:novel scaffold:cavPor3:scaffold_22:23562397:23583692:1 gene:ENSCPOG00000009164 transcript:ENSCPOT00000009247	Cavia_porcellus.cavPor3.59.pep.fasta
Spectrum34719 scans:7557,	VGAFTVIckDADEAK	c8: Carbamidomethyl (+57.02), k9: Acetyl (+42.01)	ENSCPOP00000008228	Mito-rich	Mito_GP1	0.95	36.5	26.4	21.4	0.469	2	555.943	1664.81	1665.82	3	0.00041	0.2462	290	304	47773.7	1	18	21	92	0.00661	0.572	possibly correct	TRUE	R	R	TRUE		File Name: S_2-1.raw (F057099)	pep:novel scaffold:cavPor3:scaffold_22:23562397:23583692:1 gene:ENSCPOG00000009164 transcript:ENSCPOT00000009247	Cavia_porcellus.cavPor3.59.pep.fasta
Spectrum4378 scans:7140,	VGAFTVIckDADEAK	c8: Carbamidomethyl (+57.02), k9: Acetyl (+42.01)	ENSCPOP00000008228	Mito-rich	Mito_GP1	0.95	43	26.4	17.4	1.41	2	555.943	1664.81	1665.82	3	0.00059	0.3542	290	304	47773.7	1	18	21	92	0.00661	0.572	possibly correct	TRUE	R	R	TRUE		File Name: S_2-1.raw (F057099)	pep:novel scaffold:cavPor3:scaffold_22:23562397:23583692:1 gene:ENSCPOG00000009164 transcript:ENSCPOT00000009247	Cavia_porcellus.cavPor3.59.pep.fasta
Spectrum25906 scans:7657,	VGAFTVIckDADEAK	c8: Carbamidomethyl (+57.02), k9: Acetyl (+42.01)	ENSCPOP00000008228	Mito-rich	Mito_GP1	0.95	46	26.4	12.1	0.824	2	555.943	1664.81	1665.82	3	-0.00031	-0.1861	290	304	47773.7	1	18	21	92	0.00661	0.572	possibly correct	TRUE	R	R	TRUE		File Name: S_2-1.raw (F057099)	pep:novel scaffold:cavPor3:scaffold_22:23562397:23583692:1 gene:ENSCPOG00000009164 transcript:ENSCPOT00000009247	Cavia_porcellus.cavPor3.59.pep.fasta
Spectrum14789 scans:8888,	VGAFTVIckDADEAK	c8: Carbamidomethyl (+57.02), k9: Acetyl (+42.01)	ENSCPOP00000008228	Mito-rich	Mito_GP1	0.95	46.9	26.4	25.2	0.854	2	555.943	1664.81	1665.82	3	5.005e-05	0.03004	290	304	47773.7	1	18	21	92	0.00661	0.572	possibly correct	TRUE	R	R	TRUE		File Name: S_2-1.raw (F057099)	pep:novel scaffold:cavPor3:scaffold_22:23562397:23583692:1 gene:ENSCPOG00000009164 transcript:ENSCPOT00000009247	Cavia_porcellus.cavPor3.59.pep.fasta
Spectrum34817 scans:7669,	VGAFTVIckDADEAK	c8: Carbamidomethyl (+57.02), k9: Acetyl (+42.01)	ENSCPOP00000008228	Mito-rich	Mito_GP1	0.95	47.7	26.5	31.9	1.74	2	833.413	1664.81	1665.82	2	0.002926	1.757	290	304	47773.7	1	18	21	92	0.00661	0.572	possibly correct	TRUE	R	R	TRUE		File Name: S_2-1.raw (F057099)	pep:novel scaffold:cavPor3:scaffold_22:23562397:23583692:1 gene:ENSCPOG00000009164 transcript:ENSCPOT00000009247	Cavia_porcellus.cavPor3.59.pep.fasta
Spectrum4364 scans:7126,	VGAFTVIckDADEAK	c8: Carbamidomethyl (+57.02), k9: Acetyl (+42.01)	ENSCPOP00000008228	Mito-rich	Mito_GP1	0.95	50.7	26.6	35.2	3.27	2	833.412	1664.81	1665.82	2	0.000846	0.5079	290	304	47773.7	1	18	21	92	0.00661	0.572	possibly correct	TRUE	R	R	TRUE		File Name: S_2-1.raw (F057099)	pep:novel scaffold:cavPor3:scaffold_22:23562397:23583692:1 gene:ENSCPOG00000009164 transcript:ENSCPOT00000009247	Cavia_porcellus.cavPor3.59.pep.fasta
Spectrum34701 scans:7537,	VGAFTVIckDADEAK	c8: Carbamidomethyl (+57.02), k9: Acetyl (+42.01)	ENSCPOP00000008228	Mito-rich	Mito_GP1	0.95	58.6	26.6	37.5	3.62	2	833.412	1664.81	1665.82	2	0.001706	1.024	290	304	47773.7	1	18	21	92	0.00661	0.572	possibly correct	TRUE	R	R	TRUE		File Name: S_2-1.raw (F057099)	pep:novel scaffold:cavPor3:scaffold_22:23562397:23583692:1 gene:ENSCPOG00000009164 transcript:ENSCPOT00000009247	Cavia_porcellus.cavPor3.59.pep.fasta
Spectrum14758 scans:8855,	VGAFTVIckDADEAK	c8: Carbamidomethyl (+57.02), k9: Acetyl (+42.01)	ENSCPOP00000008228	Mito-rich	Mito_GP1	0.95	60.8	26.4	40.7	1.59	2	833.412	1664.81	1665.82	2	0.000366	0.2197	290	304	47773.7	1	18	21	92	0.00661	0.572	possibly correct	TRUE	R	R	TRUE		File Name: S_2-1.raw (F057099)	pep:novel scaffold:cavPor3:scaffold_22:23562397:23583692:1 gene:ENSCPOG00000009164 transcript:ENSCPOT00000009247	Cavia_porcellus.cavPor3.59.pep.fasta
Spectrum25889 scans:7639,	VGAFTVIckDADEAK	c8: Carbamidomethyl (+57.02), k9: Acetyl (+42.01)	ENSCPOP00000008228	Mito-rich	Mito_GP1	0.95	75.2	26.4	45.4	4.8	2	833.412	1664.81	1665.82	2	0.000246	0.1477	290	304	47773.7	1	18	21	92	0.00661	0.572	possibly correct	TRUE	R	R	TRUE		File Name: S_2-1.raw (F057099)	pep:novel scaffold:cavPor3:scaffold_22:23562397:23583692:1 gene:ENSCPOG00000009164 transcript:ENSCPOT00000009247	Cavia_porcellus.cavPor3.59.pep.fasta
Spectrum28756 scans:10704,	YYDPkTcGFDFTGAMEDISK	k5: Acetyl (+42.01), c7: Carbamidomethyl (+57.02)	ENSCPOP00000008228	Mito-rich	Mito_GP1	0.95	0	0	0	2.62	2	796.68	2387.02	2387.02	3	1.003	0.189	183	202	47773.7	1	18	21	92	0.00661	0.572	possibly correct	TRUE	R	I	TRUE		File Name: S_2-1.raw (F057099)	pep:novel scaffold:cavPor3:scaffold_22:23562397:23583692:1 gene:ENSCPOG00000009164 transcript:ENSCPOT00000009247	Cavia_porcellus.cavPor3.59.pep.fasta
Spectrum36457 scans:9444,	YYDPkTcGFDFTGAmEDISK	k5: Acetyl (+42.01), c7: Carbamidomethyl (+57.02), m15: Oxidation (+15.99)	ENSCPOP00000008228	Mito-rich	Mito_GP1	0.95	58.8	25	58.8	5.92	2	1202.01	2402.01	2403.02	2	-0.001449	-0.603	183	202	47773.7	1	18	21	92	0.00661	0.572	possibly correct	TRUE	R	I	TRUE		File Name: S_2-1.raw (F057099)	pep:novel scaffold:cavPor3:scaffold_22:23562397:23583692:1 gene:ENSCPOG00000009164 transcript:ENSCPOT00000009247	Cavia_porcellus.cavPor3.59.pep.fasta
Spectrum28746 scans:10693,	YYDPkTcGFDFTGAMEDISK	k5: Acetyl (+42.01), c7: Carbamidomethyl (+57.02)	ENSCPOP00000008228	Mito-rich	Mito_GP1	0.95	62.9	25	62.9	5.49	2	1194.01	2386.01	2387.02	2	0.000306	0.1282	183	202	47773.7	1	18	21	92	0.00661	0.572	possibly correct	TRUE	R	I	TRUE		File Name: S_2-1.raw (F057099)	pep:novel scaffold:cavPor3:scaffold_22:23562397:23583692:1 gene:ENSCPOG00000009164 transcript:ENSCPOT00000009247	Cavia_porcellus.cavPor3.59.pep.fasta
Spectrum28754 scans:10702,	YYDPkTcGFDFTGAMEDISK	k5: Acetyl (+42.01), c7: Carbamidomethyl (+57.02)	ENSCPOP00000008228	Mito-rich	Mito_GP1	0.95	63.4	25	63.4	7.25	2	1194.02	2386.02	2387.02	2	0.004226	1.77	183	202	47773.7	1	18	21	92	0.00661	0.572	possibly correct	TRUE	R	I	TRUE		File Name: S_2-1.raw (F057099)	pep:novel scaffold:cavPor3:scaffold_22:23562397:23583692:1 gene:ENSCPOG00000009164 transcript:ENSCPOT00000009247	Cavia_porcellus.cavPor3.59.pep.fasta
Spectrum6988 scans:9914,	YYDPkTcGFDFTGAMEDISK	k5: Acetyl (+42.01), c7: Carbamidomethyl (+57.02)	ENSCPOP00000008228	Mito-rich	Mito_GP1	0.95	73.4	25	73.4	6.89	2	1194.01	2386.01	2387.02	2	-0.001894	-0.7934	183	202	47773.7	1	18	21	92	0.00661	0.572	possibly correct	TRUE	R	I	TRUE		File Name: S_2-1.raw (F057099)	pep:novel scaffold:cavPor3:scaffold_22:23562397:23583692:1 gene:ENSCPOG00000009164 transcript:ENSCPOT00000009247	Cavia_porcellus.cavPor3.59.pep.fasta
Spectrum27633 scans:9519,	YYDPkTcGFDFTGAmEDISK	k5: Acetyl (+42.01), c7: Carbamidomethyl (+57.02), m15: Oxidation (+15.99)	ENSCPOP00000008228	Mito-rich	Mito_GP1	0.95	75.7	25	75.7	8.07	2	1202.01	2402.01	2403.02	2	3.104e-05	0.01292	183	202	47773.7	1	18	21	92	0.00661	0.572	possibly correct	TRUE	R	I	TRUE		File Name: S_2-1.raw (F057099)	pep:novel scaffold:cavPor3:scaffold_22:23562397:23583692:1 gene:ENSCPOG00000009164 transcript:ENSCPOT00000009247	Cavia_porcellus.cavPor3.59.pep.fasta
Spectrum36399 scans:9383,	YYDPkTcGFDFTGAmEDISK	k5: Acetyl (+42.01), c7: Carbamidomethyl (+57.02), m15: Oxidation (+15.99)	ENSCPOP00000008228	Mito-rich	Mito_GP1	0.95	78.7	25	77.8	6.29	2	1202.01	2402.01	2403.02	2	3.104e-05	0.01292	183	202	47773.7	1	18	21	92	0.00661	0.572	possibly correct	TRUE	R	I	TRUE		File Name: S_2-1.raw (F057099)	pep:novel scaffold:cavPor3:scaffold_22:23562397:23583692:1 gene:ENSCPOG00000009164 transcript:ENSCPOT00000009247	Cavia_porcellus.cavPor3.59.pep.fasta
Spectrum5932 scans:8802,	YYDPkTcGFDFTGAmEDISK	k5: Acetyl (+42.01), c7: Carbamidomethyl (+57.02), m15: Oxidation (+15.99)	ENSCPOP00000008228	Mito-rich	Mito_GP1	0.95	81.4	25	79.2	8.34	2	1202.01	2402.01	2403.02	2	-0.000949	-0.3949	183	202	47773.7	1	18	21	92	0.00661	0.572	possibly correct	TRUE	R	I	TRUE		File Name: S_2-1.raw (F057099)	pep:novel scaffold:cavPor3:scaffold_22:23562397:23583692:1 gene:ENSCPOG00000009164 transcript:ENSCPOT00000009247	Cavia_porcellus.cavPor3.59.pep.fasta
Spectrum27616 scans:9501,	YYDPkTcGFDFTGAmEDISK	k5: Acetyl (+42.01), c7: Carbamidomethyl (+57.02), m15: Oxidation (+15.99)	ENSCPOP00000008228	Mito-rich	Mito_GP1	0.95	87	25	87	10.1	2	1202.01	2402.01	2403.02	2	-0.003149	-1.31	183	202	47773.7	1	18	21	92	0.00661	0.572	possibly correct	TRUE	R	I	TRUE		File Name: S_2-1.raw (F057099)	pep:novel scaffold:cavPor3:scaffold_22:23562397:23583692:1 gene:ENSCPOG00000009164 transcript:ENSCPOT00000009247	Cavia_porcellus.cavPor3.59.pep.fasta
Spectrum15090 scans:9206,	IITEkAVFDVDK	k5: Acetyl (+42.01)	ENSCPOP00000011673	Mito-rich	Mito_GP1	0.95	34.8	27.2	29.6	0.854	2	710.39	1418.77	1419.77	2	0.0005113	0.3602	469	480	55917.5	1	5	5	23	0.00165	0.0962	possibly correct	TRUE	R	K	TRUE		File Name: S_2-1.raw (F057099)	pep:novel scaffold:cavPor3:scaffold_29:14939013:15052270:1 gene:ENSCPOG00000012966 transcript:ENSCPOT00000013091	Cavia_porcellus.cavPor3.59.pep.fasta
Spectrum34985 scans:7856,	IITEkAVFDVDK	k5: Acetyl (+42.01)	ENSCPOP00000011673	Mito-rich	Mito_GP1	0.95	35.5	27.7	21.2	0.215	2	710.39	1418.77	1419.77	2	-0.0005887	-0.4146	469	480	55917.5	1	5	5	23	0.00165	0.0962	possibly correct	TRUE	R	K	TRUE		File Name: S_2-1.raw (F057099)	pep:novel scaffold:cavPor3:scaffold_29:14939013:15052270:1 gene:ENSCPOG00000012966 transcript:ENSCPOT00000013091	Cavia_porcellus.cavPor3.59.pep.fasta
Spectrum4627 scans:7410,	IITEkAVFDVDK	k5: Acetyl (+42.01)	ENSCPOP00000011673	Mito-rich	Mito_GP1	0.95	62.7	27.1	48.4	1.8	2	710.391	1418.77	1419.77	2	0.0007513	0.5292	469	480	55917.5	1	5	5	23	0.00165	0.0962	possibly correct	TRUE	R	K	TRUE		File Name: S_2-1.raw (F057099)	pep:novel scaffold:cavPor3:scaffold_29:14939013:15052270:1 gene:ENSCPOG00000012966 transcript:ENSCPOT00000013091	Cavia_porcellus.cavPor3.59.pep.fasta
Spectrum24916 scans:6575,	IITEkAVFDVDKK	k5: Acetyl (+42.01)	ENSCPOP00000011673	Mito-rich	Mito_GP1	0.95	24.1	26.3	21.2	-0.0792	2	516.627	1546.86	1547.87	3	-0.0009847	-0.6361	469	481	55917.5	1	5	5	23	0.00165	0.0962	possibly correct	TRUE	R	K	TRUE		File Name: S_2-1.raw (F057099)	pep:novel scaffold:cavPor3:scaffold_29:14939013:15052270:1 gene:ENSCPOG00000012966 transcript:ENSCPOT00000013091	Cavia_porcellus.cavPor3.59.pep.fasta
Spectrum2383 scans:4967,	ImEkcTLPLTGK	m2: Oxidation (+15.99), k4: Acetyl (+42.01), c5: Carbamidomethyl (+57.02)	ENSCPOP00000011673	Mito-rich	Mito_GP1	0.95	31.9	27.4	31.9	2.55	2	724.878	1447.74	1448.75	2	0.000471	0.3251	452	463	55917.5	1	5	5	23	0.00165	0.0962	possibly correct	TRUE	K	Q	TRUE		File Name: S_2-1.raw (F057099)	pep:novel scaffold:cavPor3:scaffold_29:14939013:15052270:1 gene:ENSCPOG00000012966 transcript:ENSCPOT00000013091	Cavia_porcellus.cavPor3.59.pep.fasta
Spectrum2394 scans:4980,	ImEkcTLPLTGK	m2: Oxidation (+15.99), k4: Acetyl (+42.01), c5: Carbamidomethyl (+57.02)	ENSCPOP00000011673	Mito-rich	Mito_GP1	0.95	36.4	27.4	31.5	2.23	2	724.879	1447.74	1448.75	2	0.000831	0.5736	452	463	55917.5	1	5	5	23	0.00165	0.0962	possibly correct	TRUE	K	Q	TRUE		File Name: S_2-1.raw (F057099)	pep:novel scaffold:cavPor3:scaffold_29:14939013:15052270:1 gene:ENSCPOG00000012966 transcript:ENSCPOT00000013091	Cavia_porcellus.cavPor3.59.pep.fasta
Spectrum12452 scans:6416,	ImEkcTLPLTGK	m2: Oxidation (+15.99), k4: Acetyl (+42.01), c5: Carbamidomethyl (+57.02)	ENSCPOP00000011673	Mito-rich	Mito_GP1	0.95	45.5	27.4	37	2.52	2	724.879	1447.74	1448.75	2	0.000591	0.408	452	463	55917.5	1	5	5	23	0.00165	0.0962	possibly correct	TRUE	K	Q	TRUE		File Name: S_2-1.raw (F057099)	pep:novel scaffold:cavPor3:scaffold_29:14939013:15052270:1 gene:ENSCPOG00000012966 transcript:ENSCPOT00000013091	Cavia_porcellus.cavPor3.59.pep.fasta
Spectrum22513 scans:3728,	mVkGmGGAmDLVSSAK	m1: Oxidation (+15.99), k3: Acetyl (+42.01), m5: Oxidation (+15.99), m9: Oxidation (+15.99)	ENSCPOP00000011673	Mito-rich	Mito_GP1	0.95	40.4	25	30.8	4.82	2	836.391	1670.77	1671.78	2	0.0001863	0.1115	419	434	55917.5	1	5	5	23	0.00165	0.0962	possibly correct	TRUE	K	T	TRUE		File Name: S_2-1.raw (F057099)	pep:novel scaffold:cavPor3:scaffold_29:14939013:15052270:1 gene:ENSCPOG00000012966 transcript:ENSCPOT00000013091	Cavia_porcellus.cavPor3.59.pep.fasta
Spectrum31354 scans:3642,	mVkGmGGAmDLVSSAK	m1: Oxidation (+15.99), k3: Acetyl (+42.01), m5: Oxidation (+15.99), m9: Oxidation (+15.99)	ENSCPOP00000011673	Mito-rich	Mito_GP1	0.95	47.9	25	47.9	2.85	2	836.392	1670.77	1671.78	2	0.001026	0.6139	419	434	55917.5	1	5	5	23	0.00165	0.0962	possibly correct	TRUE	K	T	TRUE		File Name: S_2-1.raw (F057099)	pep:novel scaffold:cavPor3:scaffold_29:14939013:15052270:1 gene:ENSCPOG00000012966 transcript:ENSCPOT00000013091	Cavia_porcellus.cavPor3.59.pep.fasta
Spectrum1173 scans:3500,	mVkGmGGAmDLVSSAK	m1: Oxidation (+15.99), k3: Acetyl (+42.01), m5: Oxidation (+15.99), m9: Oxidation (+15.99)	ENSCPOP00000011673	Mito-rich	Mito_GP1	0.95	69.4	25	69.4	7.7	2	836.391	1670.77	1671.78	2	-0.001034	-0.6183	419	434	55917.5	1	5	5	23	0.00165	0.0962	possibly correct	TRUE	K	T	TRUE		File Name: S_2-1.raw (F057099)	pep:novel scaffold:cavPor3:scaffold_29:14939013:15052270:1 gene:ENSCPOG00000012966 transcript:ENSCPOT00000013091	Cavia_porcellus.cavPor3.59.pep.fasta
Spectrum31425 scans:3747,	mVkGmGGAmDLVSSAK	m1: Oxidation (+15.99), k3: Acetyl (+42.01), m5: Oxidation (+15.99), m9: Oxidation (+15.99)	ENSCPOP00000011673	Mito-rich	Mito_GP1	0.95	70.5	25	70.5	7.64	2	836.392	1670.77	1671.78	2	0.0006663	0.3986	419	434	55917.5	1	5	5	23	0.00165	0.0962	possibly correct	TRUE	K	T	TRUE		File Name: S_2-1.raw (F057099)	pep:novel scaffold:cavPor3:scaffold_29:14939013:15052270:1 gene:ENSCPOG00000012966 transcript:ENSCPOT00000013091	Cavia_porcellus.cavPor3.59.pep.fasta
Spectrum31441 scans:3766,	mVkGmGGAmDLVSSAK	m1: Oxidation (+15.99), k3: Acetyl (+42.01), m5: Oxidation (+15.99), m9: Oxidation (+15.99)	ENSCPOP00000011673	Mito-rich	Mito_GP1	0.95	75.6	25	72.6	4.82	2	836.392	1670.77	1671.78	2	0.002006	1.2	419	434	55917.5	1	5	5	23	0.00165	0.0962	possibly correct	TRUE	K	T	TRUE		File Name: S_2-1.raw (F057099)	pep:novel scaffold:cavPor3:scaffold_29:14939013:15052270:1 gene:ENSCPOG00000012966 transcript:ENSCPOT00000013091	Cavia_porcellus.cavPor3.59.pep.fasta
Spectrum1240 scans:3595,	mVkGmGGAmDLVSSAK	m1: Oxidation (+15.99), k3: Acetyl (+42.01), m5: Oxidation (+15.99), m9: Oxidation (+15.99)	ENSCPOP00000011673	Mito-rich	Mito_GP1	0.95	79.2	25	75.9	6.44	2	836.391	1670.77	1671.78	2	-0.0007937	-0.4748	419	434	55917.5	1	5	5	23	0.00165	0.0962	possibly correct	TRUE	K	T	TRUE		File Name: S_2-1.raw (F057099)	pep:novel scaffold:cavPor3:scaffold_29:14939013:15052270:1 gene:ENSCPOG00000012966 transcript:ENSCPOT00000013091	Cavia_porcellus.cavPor3.59.pep.fasta
Spectrum22584 scans:3827,	mVkGmGGAmDLVSSAK	m1: Oxidation (+15.99), k3: Acetyl (+42.01), m5: Oxidation (+15.99), m9: Oxidation (+15.99)	ENSCPOP00000011673	Mito-rich	Mito_GP1	0.95	80	25	79.7	8.07	2	836.391	1670.77	1671.78	2	0.0004263	0.255	419	434	55917.5	1	5	5	23	0.00165	0.0962	possibly correct	TRUE	K	T	TRUE		File Name: S_2-1.raw (F057099)	pep:novel scaffold:cavPor3:scaffold_29:14939013:15052270:1 gene:ENSCPOG00000012966 transcript:ENSCPOT00000013091	Cavia_porcellus.cavPor3.59.pep.fasta
Spectrum10852 scans:4697,	mVkGmGGAmDLVSSAK	m1: Oxidation (+15.99), k3: Acetyl (+42.01), m5: Oxidation (+15.99), m9: Oxidation (+15.99)	ENSCPOP00000011673	Mito-rich	Mito_GP1	0.95	81.7	25	78.4	8.02	2	836.391	1670.77	1671.78	2	-0.0001937	-0.1159	419	434	55917.5	1	5	5	23	0.00165	0.0962	possibly correct	TRUE	K	T	TRUE		File Name: S_2-1.raw (F057099)	pep:novel scaffold:cavPor3:scaffold_29:14939013:15052270:1 gene:ENSCPOG00000012966 transcript:ENSCPOT00000013091	Cavia_porcellus.cavPor3.59.pep.fasta
Spectrum1246 scans:3605,	mVkGmGGAmDLVSSAK	m1: Oxidation (+15.99), k3: Acetyl (+42.01), m5: Oxidation (+15.99), m9: Oxidation (+15.99)	ENSCPOP00000011673	Mito-rich	Mito_GP1	0.95	83.9	25	79.5	5.96	2	836.393	1670.77	1671.78	2	0.002626	1.571	419	434	55917.5	1	5	5	23	0.00165	0.0962	possibly correct	TRUE	K	T	TRUE		File Name: S_2-1.raw (F057099)	pep:novel scaffold:cavPor3:scaffold_29:14939013:15052270:1 gene:ENSCPOG00000012966 transcript:ENSCPOT00000013091	Cavia_porcellus.cavPor3.59.pep.fasta
Spectrum1170 scans:3496,	mVkGmGGAmDLVSSAK	m1: Oxidation (+15.99), k3: Acetyl (+42.01), m5: Oxidation (+15.99), m9: Oxidation (+15.99)	ENSCPOP00000011673	Mito-rich	Mito_GP1	0.95	87.2	25	85.1	6.82	2	836.391	1670.77	1671.78	2	-5.368e-05	-0.03211	419	434	55917.5	1	5	5	23	0.00165	0.0962	possibly correct	TRUE	K	T	TRUE		File Name: S_2-1.raw (F057099)	pep:novel scaffold:cavPor3:scaffold_29:14939013:15052270:1 gene:ENSCPOG00000012966 transcript:ENSCPOT00000013091	Cavia_porcellus.cavPor3.59.pep.fasta
Spectrum31361 scans:3652,	mVkGmGGAmDLVSSAK	m1: Oxidation (+15.99), k3: Acetyl (+42.01), m5: Oxidation (+15.99), m9: Oxidation (+15.99)	ENSCPOP00000011673	Mito-rich	Mito_GP1	0.95	87.8	25	82	6.05	2	836.391	1670.77	1671.78	2	0.0003063	0.1832	419	434	55917.5	1	5	5	23	0.00165	0.0962	possibly correct	TRUE	K	T	TRUE		File Name: S_2-1.raw (F057099)	pep:novel scaffold:cavPor3:scaffold_29:14939013:15052270:1 gene:ENSCPOG00000012966 transcript:ENSCPOT00000013091	Cavia_porcellus.cavPor3.59.pep.fasta
Spectrum10746 scans:4573,	mVkGmGGAmDLVSSAK	m1: Oxidation (+15.99), k3: Acetyl (+42.01), m5: Oxidation (+15.99), m9: Oxidation (+15.99)	ENSCPOP00000011673	Mito-rich	Mito_GP1	0.95	93.2	25	93.1	7.12	2	836.391	1670.77	1671.78	2	-0.0001937	-0.1159	419	434	55917.5	1	5	5	23	0.00165	0.0962	possibly correct	TRUE	K	T	TRUE		File Name: S_2-1.raw (F057099)	pep:novel scaffold:cavPor3:scaffold_29:14939013:15052270:1 gene:ENSCPOG00000012966 transcript:ENSCPOT00000013091	Cavia_porcellus.cavPor3.59.pep.fasta
Spectrum8574 scans:1819,	SAkPADNVR	k3: Acetyl (+42.01)	ENSCPOP00000011673	Mito-rich	Mito_GP1	0.95	26	25	17.1	0.398	2	500.265	998.515	999.522	2	9.135e-05	0.09139	294	302	55917.5	1	5	5	23	0.00165	0.0962	possibly correct	TRUE	K	E	TRUE		File Name: S_2-1.raw (F057099)	pep:novel scaffold:cavPor3:scaffold_29:14939013:15052270:1 gene:ENSCPOG00000012966 transcript:ENSCPOT00000013091	Cavia_porcellus.cavPor3.59.pep.fasta
Spectrum21225 scans:1662,	SAkPADNVR	k3: Acetyl (+42.01)	ENSCPOP00000011673	Mito-rich	Mito_GP1	0.95	32.7	25	20.8	0.959	2	500.265	998.515	999.522	2	0.0001513	0.1514	294	302	55917.5	1	5	5	23	0.00165	0.0962	possibly correct	TRUE	K	E	TRUE		File Name: S_2-1.raw (F057099)	pep:novel scaffold:cavPor3:scaffold_29:14939013:15052270:1 gene:ENSCPOG00000012966 transcript:ENSCPOT00000013091	Cavia_porcellus.cavPor3.59.pep.fasta
Spectrum30160 scans:1648,	SAkPADNVR	k3: Acetyl (+42.01)	ENSCPOP00000011673	Mito-rich	Mito_GP1	0.95	34	25	21.2	0.886	2	500.265	998.515	999.522	2	0.0001513	0.1514	294	302	55917.5	1	5	5	23	0.00165	0.0962	possibly correct	TRUE	K	E	TRUE		File Name: S_2-1.raw (F057099)	pep:novel scaffold:cavPor3:scaffold_29:14939013:15052270:1 gene:ENSCPOG00000012966 transcript:ENSCPOT00000013091	Cavia_porcellus.cavPor3.59.pep.fasta
Spectrum191 scans:1685,	SAkPADNVR	k3: Acetyl (+42.01)	ENSCPOP00000011673	Mito-rich	Mito_GP1	0.95	37.9	25	17	0	2	500.265	998.515	999.522	2	0.0003313	0.3315	294	302	55917.5	1	5	5	23	0.00165	0.0962	possibly correct	TRUE	K	E	TRUE		File Name: S_2-1.raw (F057099)	pep:novel scaffold:cavPor3:scaffold_29:14939013:15052270:1 gene:ENSCPOG00000012966 transcript:ENSCPOT00000013091	Cavia_porcellus.cavPor3.59.pep.fasta
Spectrum33626 scans:6353,	DNPkVVHAFDmEDLGDK	k4: Acetyl (+42.01), m11: Oxidation (+15.99)	ENSCPOP00000011674	Mito-rich	Mito_GP1	0.95	41.5	25	40.6	0	2	663.308	1986.9	1987.91	3	0.0012	0.6038	52	68	12178.2	0.999	1	1	1	7.19e-05	0.157	possibly correct	TRUE	K	A	TRUE		File Name: S_2-1.raw (F057099)	pep:novel scaffold:cavPor3:scaffold_80:3647536:3647862:-1 gene:ENSCPOG00000012967 transcript:ENSCPOT00000013092	Cavia_porcellus.cavPor3.59.pep.fasta
Spectrum37556 scans:10622,	DIFQEIFDkHYK	k9: Acetyl (+42.01)	ENSCPOP00000007630	Mito-rich	Mito_GP1	0.946	22.4	26.6	5.51	0.509	2	542.272	1623.79	1624.8	3	0.0005453	0.3356	264	275	50765.3	1	22	30	169	0.0121	0.476	correct	TRUE	K	T	TRUE		File Name: S_2-1.raw (F057099)	pep:novel scaffold:cavPor3:scaffold_10:34101089:34115102:1 gene:ENSCPOG00000008488 transcript:ENSCPOT00000008565	Cavia_porcellus.cavPor3.59.pep.fasta
Spectrum7057 scans:9988,	DIFQEIFDkHYK	k9: Acetyl (+42.01)	ENSCPOP00000007630	Mito-rich	Mito_GP1	0.95	25.1	26.7	8.35	0.745	2	542.272	1623.79	1624.8	3	5.347e-06	0.003291	264	275	50765.3	1	22	30	169	0.0121	0.476	possibly correct	TRUE	K	T	TRUE		File Name: S_2-1.raw (F057099)	pep:novel scaffold:cavPor3:scaffold_10:34101089:34115102:1 gene:ENSCPOG00000008488 transcript:ENSCPOT00000008565	Cavia_porcellus.cavPor3.59.pep.fasta
Spectrum28800 scans:10751,	DIFQEIFDkHYK	k9: Acetyl (+42.01)	ENSCPOP00000007630	Mito-rich	Mito_GP1	0.95	25.2	26.7	3.63	-0.146	2	542.272	1623.79	1624.8	3	-0.0001747	-0.1075	264	275	50765.3	1	22	30	169	0.0121	0.476	possibly correct	TRUE	K	T	TRUE		File Name: S_2-1.raw (F057099)	pep:novel scaffold:cavPor3:scaffold_10:34101089:34115102:1 gene:ENSCPOG00000008488 transcript:ENSCPOT00000008565	Cavia_porcellus.cavPor3.59.pep.fasta
Spectrum37570 scans:10637,	DIFQEIFDkHYK	k9: Acetyl (+42.01)	ENSCPOP00000007630	Mito-rich	Mito_GP1	0.95	61	26.8	30.6	3.09	2	812.905	1623.8	1624.8	2	0.001471	0.9056	264	275	50765.3	1	22	30	169	0.0121	0.476	possibly correct	TRUE	K	T	TRUE		File Name: S_2-1.raw (F057099)	pep:novel scaffold:cavPor3:scaffold_10:34101089:34115102:1 gene:ENSCPOG00000008488 transcript:ENSCPOT00000008565	Cavia_porcellus.cavPor3.59.pep.fasta
Spectrum28816 scans:10767,	DIFQEIFDkHYK	k9: Acetyl (+42.01)	ENSCPOP00000007630	Mito-rich	Mito_GP1	0.95	65.4	26.6	35.2	2.64	2	812.903	1623.79	1624.8	2	-0.001689	-1.039	264	275	50765.3	1	22	30	169	0.0121	0.476	possibly correct	TRUE	K	T	TRUE		File Name: S_2-1.raw (F057099)	pep:novel scaffold:cavPor3:scaffold_10:34101089:34115102:1 gene:ENSCPOG00000008488 transcript:ENSCPOT00000008565	Cavia_porcellus.cavPor3.59.pep.fasta
Spectrum36419 scans:9404,	DQTNDQVTIDSALATQkYSVAVK	k17: Acetyl (+42.01)	ENSCPOP00000007630	Mito-rich	Mito_GP1	0.95	0	0	0	8.07	2	1269.64	2537.26	2537.27	2	0.9978	-1.929	90	112	50765.3	1	22	30	169	0.0121	0.476	possibly correct	TRUE	R	C	TRUE		File Name: S_2-1.raw (F057099)	pep:novel scaffold:cavPor3:scaffold_10:34101089:34115102:1 gene:ENSCPOG00000008488 transcript:ENSCPOT00000008565	Cavia_porcellus.cavPor3.59.pep.fasta
Spectrum27592 scans:9476,	DQTNDQVTIDSALATQkYSVAVK	k17: Acetyl (+42.01)	ENSCPOP00000007630	Mito-rich	Mito_GP1	0.95	54.5	29.1	18.2	3.64	2	846.429	2536.27	2537.27	3	0.0003753	0.1479	90	112	50765.3	1	22	30	169	0.0121	0.476	possibly correct	TRUE	R	C	TRUE		File Name: S_2-1.raw (F057099)	pep:novel scaffold:cavPor3:scaffold_10:34101089:34115102:1 gene:ENSCPOG00000008488 transcript:ENSCPOT00000008565	Cavia_porcellus.cavPor3.59.pep.fasta
Spectrum5904 scans:8773,	DQTNDQVTIDSALATQkYSVAVK	k17: Acetyl (+42.01)	ENSCPOP00000007630	Mito-rich	Mito_GP1	0.95	57.8	29.1	25	3.17	2	846.43	2536.27	2537.27	3	0.001305	0.5145	90	112	50765.3	1	22	30	169	0.0121	0.476	possibly correct	TRUE	R	C	TRUE		File Name: S_2-1.raw (F057099)	pep:novel scaffold:cavPor3:scaffold_10:34101089:34115102:1 gene:ENSCPOG00000008488 transcript:ENSCPOT00000008565	Cavia_porcellus.cavPor3.59.pep.fasta
Spectrum16659 scans:10859,	DQTNDQVTIDSALATQkYSVAVK	k17: Acetyl (+42.01)	ENSCPOP00000007630	Mito-rich	Mito_GP1	0.95	66.1	29.2	24.7	4.41	2	846.43	2536.27	2537.27	3	0.002775	1.094	90	112	50765.3	1	22	30	169	0.0121	0.476	possibly correct	TRUE	R	C	TRUE		File Name: S_2-1.raw (F057099)	pep:novel scaffold:cavPor3:scaffold_10:34101089:34115102:1 gene:ENSCPOG00000008488 transcript:ENSCPOT00000008565	Cavia_porcellus.cavPor3.59.pep.fasta
Spectrum36389 scans:9373,	DQTNDQVTIDSALATQkYSVAVK	k17: Acetyl (+42.01)	ENSCPOP00000007630	Mito-rich	Mito_GP1	0.95	73	29.1	25.6	2.2	2	846.43	2536.27	2537.27	3	0.001305	0.5145	90	112	50765.3	1	22	30	169	0.0121	0.476	possibly correct	TRUE	R	C	TRUE		File Name: S_2-1.raw (F057099)	pep:novel scaffold:cavPor3:scaffold_10:34101089:34115102:1 gene:ENSCPOG00000008488 transcript:ENSCPOT00000008565	Cavia_porcellus.cavPor3.59.pep.fasta
Spectrum27650 scans:9537,	DQTNDQVTIDSALATQkYSVAVK	k17: Acetyl (+42.01)	ENSCPOP00000007630	Mito-rich	Mito_GP1	0.95	103	29.2	38.6	7.96	2	1269.14	2536.27	2537.27	2	-0.0002087	-0.08224	90	112	50765.3	1	22	30	169	0.0121	0.476	possibly correct	TRUE	R	C	TRUE		File Name: S_2-1.raw (F057099)	pep:novel scaffold:cavPor3:scaffold_10:34101089:34115102:1 gene:ENSCPOG00000008488 transcript:ENSCPOT00000008565	Cavia_porcellus.cavPor3.59.pep.fasta
Spectrum27635 scans:9521,	DQTNDQVTIDSALATQkYSVAVK	k17: Acetyl (+42.01)	ENSCPOP00000007630	Mito-rich	Mito_GP1	0.95	110	29.1	43.2	6.89	2	1269.14	2536.27	2537.27	2	0.0007513	0.2961	90	112	50765.3	1	22	30	169	0.0121	0.476	possibly correct	TRUE	R	C	TRUE		File Name: S_2-1.raw (F057099)	pep:novel scaffold:cavPor3:scaffold_10:34101089:34115102:1 gene:ENSCPOG00000008488 transcript:ENSCPOT00000008565	Cavia_porcellus.cavPor3.59.pep.fasta
Spectrum36453 scans:9440,	DQTNDQVTIDSALATQkYSVAVK	k17: Acetyl (+42.01)	ENSCPOP00000007630	Mito-rich	Mito_GP1	0.95	110	29.2	30.7	7.06	2	1269.14	2536.27	2537.27	2	0.002471	0.974	90	112	50765.3	1	22	30	169	0.0121	0.476	possibly correct	TRUE	R	C	TRUE		File Name: S_2-1.raw (F057099)	pep:novel scaffold:cavPor3:scaffold_10:34101089:34115102:1 gene:ENSCPOG00000008488 transcript:ENSCPOT00000008565	Cavia_porcellus.cavPor3.59.pep.fasta
Spectrum24354 scans:5954,	EPIIckNIPR	c5: Carbamidomethyl (+57.02), k6: Acetyl (+42.01)	ENSCPOP00000007630	Mito-rich	Mito_GP1	0.95	26.5	26	18.6	1.85	2	641.353	1280.69	1281.7	2	0.000326	0.2544	150	159	50765.3	1	22	30	169	0.0121	0.476	possibly correct	TRUE	R	L	TRUE		File Name: S_2-1.raw (F057099)	pep:novel scaffold:cavPor3:scaffold_10:34101089:34115102:1 gene:ENSCPOG00000008488 transcript:ENSCPOT00000008565	Cavia_porcellus.cavPor3.59.pep.fasta
Spectrum13074 scans:7075,	EPIIckNIPR	c5: Carbamidomethyl (+57.02), k6: Acetyl (+42.01)	ENSCPOP00000007630	Mito-rich	Mito_GP1	0.95	28.1	26	23.1	1.27	2	641.353	1280.69	1281.7	2	0.000806	0.6289	150	159	50765.3	1	22	30	169	0.0121	0.476	possibly correct	TRUE	R	L	TRUE		File Name: S_2-1.raw (F057099)	pep:novel scaffold:cavPor3:scaffold_10:34101089:34115102:1 gene:ENSCPOG00000008488 transcript:ENSCPOT00000008565	Cavia_porcellus.cavPor3.59.pep.fasta
Spectrum33167 scans:5853,	EPIIckNIPR	c5: Carbamidomethyl (+57.02), k6: Acetyl (+42.01)	ENSCPOP00000007630	Mito-rich	Mito_GP1	0.95	36.7	26	28	1.46	2	641.353	1280.69	1281.7	2	0.000206	0.1608	150	159	50765.3	1	22	30	169	0.0121	0.476	possibly correct	TRUE	R	L	TRUE		File Name: S_2-1.raw (F057099)	pep:novel scaffold:cavPor3:scaffold_10:34101089:34115102:1 gene:ENSCPOG00000008488 transcript:ENSCPOT00000008565	Cavia_porcellus.cavPor3.59.pep.fasta
Spectrum2901 scans:5552,	EPIIckNIPR	c5: Carbamidomethyl (+57.02), k6: Acetyl (+42.01)	ENSCPOP00000007630	Mito-rich	Mito_GP1	0.95	61	26	32.4	0.523	2	641.353	1280.69	1281.7	2	0.000566	0.4416	150	159	50765.3	1	22	30	169	0.0121	0.476	possibly correct	TRUE	R	L	TRUE		File Name: S_2-1.raw (F057099)	pep:novel scaffold:cavPor3:scaffold_10:34101089:34115102:1 gene:ENSCPOG00000008488 transcript:ENSCPOT00000008565	Cavia_porcellus.cavPor3.59.pep.fasta
Spectrum4950 scans:7756,	FAQTLEkVcVETVESGAmTK	k7: Acetyl (+42.01), c9: Carbamidomethyl (+57.02), m18: Oxidation (+15.99)	ENSCPOP00000007630	Mito-rich	Mito_GP1	0.95	0	0	0	5.85	2	763.04	2286.1	2286.1	3	1.006	1.507	394	413	50765.3	1	22	30	169	0.0121	0.476	possibly correct	TRUE	R	D	TRUE		File Name: S_2-1.raw (F057099)	pep:novel scaffold:cavPor3:scaffold_10:34101089:34115102:1 gene:ENSCPOG00000008488 transcript:ENSCPOT00000008565	Cavia_porcellus.cavPor3.59.pep.fasta
Spectrum35338 scans:8245,	FAQTLEkVcVETVESGAmTK	k7: Acetyl (+42.01), c9: Carbamidomethyl (+57.02), m18: Oxidation (+15.99)	ENSCPOP00000007630	Mito-rich	Mito_GP1	0.95	44.2	26.9	44.2	3.08	2	762.705	2285.09	2286.1	3	0.001295	0.5665	394	413	50765.3	1	22	30	169	0.0121	0.476	possibly correct	TRUE	R	D	TRUE		File Name: S_2-1.raw (F057099)	pep:novel scaffold:cavPor3:scaffold_10:34101089:34115102:1 gene:ENSCPOG00000008488 transcript:ENSCPOT00000008565	Cavia_porcellus.cavPor3.59.pep.fasta
Spectrum36300 scans:9279,	FAQTLEkVcVETVESGAMTK	k7: Acetyl (+42.01), c9: Carbamidomethyl (+57.02)	ENSCPOP00000007630	Mito-rich	Mito_GP1	0.95	57.7	27.5	53.2	2.6	2	757.374	2269.1	2270.1	3	0.00321	1.414	394	413	50765.3	1	22	30	169	0.0121	0.476	possibly correct	TRUE	R	D	TRUE		File Name: S_2-1.raw (F057099)	pep:novel scaffold:cavPor3:scaffold_10:34101089:34115102:1 gene:ENSCPOG00000008488 transcript:ENSCPOT00000008565	Cavia_porcellus.cavPor3.59.pep.fasta
Spectrum26536 scans:8347,	FAQTLEkVcVETVESGAmTK	k7: Acetyl (+42.01), c9: Carbamidomethyl (+57.02), m18: Oxidation (+15.99)	ENSCPOP00000007630	Mito-rich	Mito_GP1	0.95	60.7	26.6	55.9	5.24	2	762.705	2285.09	2286.1	3	5.037e-06	0.002203	394	413	50765.3	1	22	30	169	0.0121	0.476	possibly correct	TRUE	R	D	TRUE		File Name: S_2-1.raw (F057099)	pep:novel scaffold:cavPor3:scaffold_10:34101089:34115102:1 gene:ENSCPOG00000008488 transcript:ENSCPOT00000008565	Cavia_porcellus.cavPor3.59.pep.fasta
Spectrum26579 scans:8394,	FAQTLEkVcVETVESGAmTK	k7: Acetyl (+42.01), c9: Carbamidomethyl (+57.02), m18: Oxidation (+15.99)	ENSCPOP00000007630	Mito-rich	Mito_GP1	0.95	63.3	26.9	63.3	4.57	2	1143.55	2285.09	2286.1	2	0.000991	0.4335	394	413	50765.3	1	22	30	169	0.0121	0.476	possibly correct	TRUE	R	D	TRUE		File Name: S_2-1.raw (F057099)	pep:novel scaffold:cavPor3:scaffold_10:34101089:34115102:1 gene:ENSCPOG00000008488 transcript:ENSCPOT00000008565	Cavia_porcellus.cavPor3.59.pep.fasta
Spectrum4953 scans:7760,	FAQTLEkVcVETVESGAmTK	k7: Acetyl (+42.01), c9: Carbamidomethyl (+57.02), m18: Oxidation (+15.99)	ENSCPOP00000007630	Mito-rich	Mito_GP1	0.95	64.5	26.8	60.5	4.82	2	762.705	2285.09	2286.1	3	0.000545	0.2384	394	413	50765.3	1	22	30	169	0.0121	0.476	possibly correct	TRUE	R	D	TRUE		File Name: S_2-1.raw (F057099)	pep:novel scaffold:cavPor3:scaffold_10:34101089:34115102:1 gene:ENSCPOG00000008488 transcript:ENSCPOT00000008565	Cavia_porcellus.cavPor3.59.pep.fasta
Spectrum5066 scans:7881,	FAQTLEkVcVETVESGAmTK	k7: Acetyl (+42.01), c9: Carbamidomethyl (+57.02), m18: Oxidation (+15.99)	ENSCPOP00000007630	Mito-rich	Mito_GP1	0.95	66.4	26.4	66.4	3.4	2	1143.55	2285.09	2286.1	2	-0.001689	-0.7388	394	413	50765.3	1	22	30	169	0.0121	0.476	possibly correct	TRUE	R	D	TRUE		File Name: S_2-1.raw (F057099)	pep:novel scaffold:cavPor3:scaffold_10:34101089:34115102:1 gene:ENSCPOG00000008488 transcript:ENSCPOT00000008565	Cavia_porcellus.cavPor3.59.pep.fasta
Spectrum5868 scans:8735,	FAQTLEkVcVETVESGAMTK	k7: Acetyl (+42.01), c9: Carbamidomethyl (+57.02)	ENSCPOP00000007630	Mito-rich	Mito_GP1	0.95	71.5	27.5	69.4	4.32	2	757.374	2269.1	2270.1	3	0.00285	1.255	394	413	50765.3	1	22	30	169	0.0121	0.476	possibly correct	TRUE	R	D	TRUE		File Name: S_2-1.raw (F057099)	pep:novel scaffold:cavPor3:scaffold_10:34101089:34115102:1 gene:ENSCPOG00000008488 transcript:ENSCPOT00000008565	Cavia_porcellus.cavPor3.59.pep.fasta
Spectrum35341 scans:8249,	FAQTLEkVcVETVESGAmTK	k7: Acetyl (+42.01), c9: Carbamidomethyl (+57.02), m18: Oxidation (+15.99)	ENSCPOP00000007630	Mito-rich	Mito_GP1	0.95	73.2	26.9	67.5	3.89	2	762.706	2285.1	2286.1	3	0.003305	1.446	394	413	50765.3	1	22	30	169	0.0121	0.476	possibly correct	TRUE	R	D	TRUE		File Name: S_2-1.raw (F057099)	pep:novel scaffold:cavPor3:scaffold_10:34101089:34115102:1 gene:ENSCPOG00000008488 transcript:ENSCPOT00000008565	Cavia_porcellus.cavPor3.59.pep.fasta
Spectrum15466 scans:9602,	FAQTLEkVcVETVESGAmTK	k7: Acetyl (+42.01), c9: Carbamidomethyl (+57.02), m18: Oxidation (+15.99)	ENSCPOP00000007630	Mito-rich	Mito_GP1	0.95	86.9	26.8	84.9	5.44	2	762.705	2285.09	2286.1	3	0.002375	1.039	394	413	50765.3	1	22	30	169	0.0121	0.476	possibly correct	TRUE	R	D	TRUE		File Name: S_2-1.raw (F057099)	pep:novel scaffold:cavPor3:scaffold_10:34101089:34115102:1 gene:ENSCPOG00000008488 transcript:ENSCPOT00000008565	Cavia_porcellus.cavPor3.59.pep.fasta
Spectrum15567 scans:9709,	FAQTLEkVcVETVESGAmTK	k7: Acetyl (+42.01), c9: Carbamidomethyl (+57.02), m18: Oxidation (+15.99)	ENSCPOP00000007630	Mito-rich	Mito_GP1	0.95	96	26.8	96	5.72	2	1143.55	2285.09	2286.1	2	0.000511	0.2235	394	413	50765.3	1	22	30	169	0.0121	0.476	possibly correct	TRUE	R	D	TRUE		File Name: S_2-1.raw (F057099)	pep:novel scaffold:cavPor3:scaffold_10:34101089:34115102:1 gene:ENSCPOG00000008488 transcript:ENSCPOT00000008565	Cavia_porcellus.cavPor3.59.pep.fasta
Spectrum35439 scans:8356,	FAQTLEkVcVETVESGAmTK	k7: Acetyl (+42.01), c9: Carbamidomethyl (+57.02), m18: Oxidation (+15.99)	ENSCPOP00000007630	Mito-rich	Mito_GP1	0.95	103	26.6	103	5.66	2	1143.55	2285.09	2286.1	2	-0.000229	-0.1002	394	413	50765.3	1	22	30	169	0.0121	0.476	possibly correct	TRUE	R	D	TRUE		File Name: S_2-1.raw (F057099)	pep:novel scaffold:cavPor3:scaffold_10:34101089:34115102:1 gene:ENSCPOG00000008488 transcript:ENSCPOT00000008565	Cavia_porcellus.cavPor3.59.pep.fasta
Spectrum15485 scans:9622,	FAQTLEkVcVETVESGAmTK	k7: Acetyl (+42.01), c9: Carbamidomethyl (+57.02), m18: Oxidation (+15.99)	ENSCPOP00000007630	Mito-rich	Mito_GP1	0.95	106	26.6	106	6.68	2	1143.55	2285.09	2286.1	2	-0.000229	-0.1002	394	413	50765.3	1	22	30	169	0.0121	0.476	possibly correct	TRUE	R	D	TRUE		File Name: S_2-1.raw (F057099)	pep:novel scaffold:cavPor3:scaffold_10:34101089:34115102:1 gene:ENSCPOG00000008488 transcript:ENSCPOT00000008565	Cavia_porcellus.cavPor3.59.pep.fasta
Spectrum4989 scans:7798,	FAQTLEkVcVETVESGAmTK	k7: Acetyl (+42.01), c9: Carbamidomethyl (+57.02), m18: Oxidation (+15.99)	ENSCPOP00000007630	Mito-rich	Mito_GP1	0.95	118	26.6	118	6.62	2	1143.55	2285.09	2286.1	2	-0.000229	-0.1002	394	413	50765.3	1	22	30	169	0.0121	0.476	possibly correct	TRUE	R	D	TRUE		File Name: S_2-1.raw (F057099)	pep:novel scaffold:cavPor3:scaffold_10:34101089:34115102:1 gene:ENSCPOG00000008488 transcript:ENSCPOT00000008565	Cavia_porcellus.cavPor3.59.pep.fasta
Spectrum35376 scans:8287,	FAQTLEkVcVETVESGAmTK	k7: Acetyl (+42.01), c9: Carbamidomethyl (+57.02), m18: Oxidation (+15.99)	ENSCPOP00000007630	Mito-rich	Mito_GP1	0.95	137	26.5	137	8.85	2	1143.55	2285.09	2286.1	2	-0.000709	-0.3101	394	413	50765.3	1	22	30	169	0.0121	0.476	possibly correct	TRUE	R	D	TRUE		File Name: S_2-1.raw (F057099)	pep:novel scaffold:cavPor3:scaffold_10:34101089:34115102:1 gene:ENSCPOG00000008488 transcript:ENSCPOT00000008565	Cavia_porcellus.cavPor3.59.pep.fasta
Spectrum7761 scans:10776,	FkDIFQEIFDK	k2: Acetyl (+42.01)	ENSCPOP00000007630	Mito-rich	Mito_GP1	0.95	0	0	0	3.27	2	736.879	1471.74	1471.75	2	1.004	0.871	262	272	50765.3	1	22	30	169	0.0121	0.476	possibly correct	TRUE	R	H	TRUE		File Name: S_2-1.raw (F057099)	pep:novel scaffold:cavPor3:scaffold_10:34101089:34115102:1 gene:ENSCPOG00000008488 transcript:ENSCPOT00000008565	Cavia_porcellus.cavPor3.59.pep.fasta
Spectrum38192 scans:11375,	FkDIFQEIFDK	k2: Acetyl (+42.01)	ENSCPOP00000007630	Mito-rich	Mito_GP1	0.95	0	0	0	3.33	2	736.879	1471.74	1471.75	2	1.004	0.545	262	272	50765.3	1	22	30	169	0.0121	0.476	possibly correct	TRUE	R	H	TRUE		File Name: S_2-1.raw (F057099)	pep:novel scaffold:cavPor3:scaffold_10:34101089:34115102:1 gene:ENSCPOG00000008488 transcript:ENSCPOT00000008565	Cavia_porcellus.cavPor3.59.pep.fasta
Spectrum29466 scans:11524,	FkDIFQEIFDK	k2: Acetyl (+42.01)	ENSCPOP00000007630	Mito-rich	Mito_GP1	0.95	0	0	0	3.85	2	736.879	1471.74	1471.75	2	1.004	0.7895	262	272	50765.3	1	22	30	169	0.0121	0.476	possibly correct	TRUE	R	H	TRUE		File Name: S_2-1.raw (F057099)	pep:novel scaffold:cavPor3:scaffold_10:34101089:34115102:1 gene:ENSCPOG00000008488 transcript:ENSCPOT00000008565	Cavia_porcellus.cavPor3.59.pep.fasta
Spectrum29489 scans:11557,	FkDIFQEIFDK	k2: Acetyl (+42.01)	ENSCPOP00000007630	Mito-rich	Mito_GP1	0.95	39.6	26.1	32.6	3.7	2	736.378	1470.74	1471.75	2	0.0009513	0.6464	262	272	50765.3	1	22	30	169	0.0121	0.476	possibly correct	TRUE	R	H	TRUE		File Name: S_2-1.raw (F057099)	pep:novel scaffold:cavPor3:scaffold_10:34101089:34115102:1 gene:ENSCPOG00000008488 transcript:ENSCPOT00000008565	Cavia_porcellus.cavPor3.59.pep.fasta
Spectrum7685 scans:10676,	FkDIFQEIFDK	k2: Acetyl (+42.01)	ENSCPOP00000007630	Mito-rich	Mito_GP1	0.95	59.6	26.1	42.3	4.82	2	736.378	1470.74	1471.75	2	0.0008313	0.5649	262	272	50765.3	1	22	30	169	0.0121	0.476	possibly correct	TRUE	R	H	TRUE		File Name: S_2-1.raw (F057099)	pep:novel scaffold:cavPor3:scaffold_10:34101089:34115102:1 gene:ENSCPOG00000008488 transcript:ENSCPOT00000008565	Cavia_porcellus.cavPor3.59.pep.fasta
Spectrum38143 scans:11307,	FkDIFQEIFDK	k2: Acetyl (+42.01)	ENSCPOP00000007630	Mito-rich	Mito_GP1	0.95	64.1	26.1	50.7	4.68	2	736.378	1470.74	1471.75	2	0.001451	0.9861	262	272	50765.3	1	22	30	169	0.0121	0.476	possibly correct	TRUE	R	H	TRUE		File Name: S_2-1.raw (F057099)	pep:novel scaffold:cavPor3:scaffold_10:34101089:34115102:1 gene:ENSCPOG00000008488 transcript:ENSCPOT00000008565	Cavia_porcellus.cavPor3.59.pep.fasta
Spectrum18460 scans:12846,	FkDIFQEIFDK	k2: Acetyl (+42.01)	ENSCPOP00000007630	Mito-rich	Mito_GP1	0.95	65.9	26.4	53.3	3.66	2	736.378	1470.74	1471.75	2	0.002311	1.57	262	272	50765.3	1	22	30	169	0.0121	0.476	possibly correct	TRUE	R	H	TRUE		File Name: S_2-1.raw (F057099)	pep:novel scaffold:cavPor3:scaffold_10:34101089:34115102:1 gene:ENSCPOG00000008488 transcript:ENSCPOT00000008565	Cavia_porcellus.cavPor3.59.pep.fasta
Spectrum29414 scans:11451,	FkDIFQEIFDK	k2: Acetyl (+42.01)	ENSCPOP00000007630	Mito-rich	Mito_GP1	0.95	66.8	26.1	57.4	4.19	2	736.377	1470.74	1471.75	2	0.0005913	0.4018	262	272	50765.3	1	22	30	169	0.0121	0.476	possibly correct	TRUE	R	H	TRUE		File Name: S_2-1.raw (F057099)	pep:novel scaffold:cavPor3:scaffold_10:34101089:34115102:1 gene:ENSCPOG00000008488 transcript:ENSCPOT00000008565	Cavia_porcellus.cavPor3.59.pep.fasta
Spectrum28576 scans:10513,	FKDIFQEIFDKHYk	k14: Acetyl (+42.01)	ENSCPOP00000007630	Mito-rich	Mito_GP1	0.903	26.3	27.9	0.77	0	2	475.747	1898.96	1899.96	4	0.0005193	0.2733	262	275	50765.3	1	22	30	169	0.0121	0.476	possibly correct	TRUE	R	T	TRUE		File Name: S_2-1.raw (F057099)	pep:novel scaffold:cavPor3:scaffold_10:34101089:34115102:1 gene:ENSCPOG00000008488 transcript:ENSCPOT00000008565	Cavia_porcellus.cavPor3.59.pep.fasta
Spectrum17523 scans:11798,	FKDIFQEIFDkHYK	k11: Acetyl (+42.01)	ENSCPOP00000007630	Mito-rich	Mito_GP1	0.95	26	28	0.1	0.745	2	475.747	1898.96	1899.96	4	0.0001593	0.08387	262	275	50765.3	1	22	30	169	0.0121	0.476	possibly correct	TRUE	R	T	TRUE		File Name: S_2-1.raw (F057099)	pep:novel scaffold:cavPor3:scaffold_10:34101089:34115102:1 gene:ENSCPOG00000008488 transcript:ENSCPOT00000008565	Cavia_porcellus.cavPor3.59.pep.fasta
Spectrum7426 scans:10380,	FkDIFQEIFDkHYK	k2: Acetyl (+42.01), k11: Acetyl (+42.01)	ENSCPOP00000007630	Mito-rich	Mito_GP1	0.95	28.1	27.9	8.09	0.495	2	647.996	1940.97	1941.97	3	-0.0003114	-0.1603	262	275	50765.3	1	22	30	169	0.0121	0.476	possibly correct	TRUE	R	T	TRUE		File Name: S_2-1.raw (F057099)	pep:novel scaffold:cavPor3:scaffold_10:34101089:34115102:1 gene:ENSCPOG00000008488 transcript:ENSCPOT00000008565	Cavia_porcellus.cavPor3.59.pep.fasta
Spectrum37322 scans:10366,	FKDIFQEIFDkHYK	k11: Acetyl (+42.01)	ENSCPOP00000007630	Mito-rich	Mito_GP1	0.95	30.3	28.1	2.15	-0.204	2	475.746	1898.96	1899.96	4	-0.0009207	-0.4846	262	275	50765.3	1	22	30	169	0.0121	0.476	possibly correct	TRUE	R	T	TRUE		File Name: S_2-1.raw (F057099)	pep:novel scaffold:cavPor3:scaffold_10:34101089:34115102:1 gene:ENSCPOG00000008488 transcript:ENSCPOT00000008565	Cavia_porcellus.cavPor3.59.pep.fasta
Spectrum37321 scans:10365,	FKDIFQEIFDkHYK	k11: Acetyl (+42.01)	ENSCPOP00000007630	Mito-rich	Mito_GP1	0.95	45.1	27.9	9.28	2	2	633.993	1898.96	1899.96	3	0.0007153	0.3765	262	275	50765.3	1	22	30	169	0.0121	0.476	possibly correct	TRUE	R	T	TRUE		File Name: S_2-1.raw (F057099)	pep:novel scaffold:cavPor3:scaffold_10:34101089:34115102:1 gene:ENSCPOG00000008488 transcript:ENSCPOT00000008565	Cavia_porcellus.cavPor3.59.pep.fasta
Spectrum6837 scans:9755,	FKDIFQEIFDkHYK	k11: Acetyl (+42.01)	ENSCPOP00000007630	Mito-rich	Mito_GP1	0.95	49.6	27.8	4.86	2.82	2	633.993	1898.96	1899.96	3	0.0008953	0.4712	262	275	50765.3	1	22	30	169	0.0121	0.476	possibly correct	TRUE	R	T	TRUE		File Name: S_2-1.raw (F057099)	pep:novel scaffold:cavPor3:scaffold_10:34101089:34115102:1 gene:ENSCPOG00000008488 transcript:ENSCPOT00000008565	Cavia_porcellus.cavPor3.59.pep.fasta
Spectrum6848 scans:9767,	FKDIFQEIFDkHYK	k11: Acetyl (+42.01)	ENSCPOP00000007630	Mito-rich	Mito_GP1	0.95	50	27.9	15.7	3.03	2	633.993	1898.96	1899.96	3	0.0003553	0.187	262	275	50765.3	1	22	30	169	0.0121	0.476	possibly correct	TRUE	R	T	TRUE		File Name: S_2-1.raw (F057099)	pep:novel scaffold:cavPor3:scaffold_10:34101089:34115102:1 gene:ENSCPOG00000008488 transcript:ENSCPOT00000008565	Cavia_porcellus.cavPor3.59.pep.fasta
Spectrum2369 scans:4952,	GkLDGNQDLIR	k2: Acetyl (+42.01)	ENSCPOP00000007630	Mito-rich	Mito_GP1	0.95	57.5	26.5	38.4	2.7	2	635.841	1269.67	1270.68	2	0.0001513	0.1191	383	393	50765.3	1	22	30	169	0.0121	0.476	possibly correct	TRUE	R	F	TRUE		File Name: S_2-1.raw (F057099)	pep:novel scaffold:cavPor3:scaffold_10:34101089:34115102:1 gene:ENSCPOG00000008488 transcript:ENSCPOT00000008565	Cavia_porcellus.cavPor3.59.pep.fasta
Spectrum12359 scans:6318,	GkLDGNQDLIR	k2: Acetyl (+42.01)	ENSCPOP00000007630	Mito-rich	Mito_GP1	0.95	60.4	26.5	45.9	2.85	2	635.841	1269.67	1270.68	2	-8.865e-05	-0.06977	383	393	50765.3	1	22	30	169	0.0121	0.476	possibly correct	TRUE	R	F	TRUE		File Name: S_2-1.raw (F057099)	pep:novel scaffold:cavPor3:scaffold_10:34101089:34115102:1 gene:ENSCPOG00000008488 transcript:ENSCPOT00000008565	Cavia_porcellus.cavPor3.59.pep.fasta
Spectrum32690 scans:5311,	GkLDGNQDLIR	k2: Acetyl (+42.01)	ENSCPOP00000007630	Mito-rich	Mito_GP1	0.95	60.9	26.5	44.7	2.49	2	635.841	1269.67	1270.68	2	0.0001513	0.1191	383	393	50765.3	1	22	30	169	0.0121	0.476	possibly correct	TRUE	R	F	TRUE		File Name: S_2-1.raw (F057099)	pep:novel scaffold:cavPor3:scaffold_10:34101089:34115102:1 gene:ENSCPOG00000008488 transcript:ENSCPOT00000008565	Cavia_porcellus.cavPor3.59.pep.fasta
Spectrum2467 scans:5067,	GkLDGNQDLIR	k2: Acetyl (+42.01)	ENSCPOP00000007630	Mito-rich	Mito_GP1	0.95	65.4	26.5	49.5	2.44	2	635.841	1269.67	1270.68	2	3.135e-05	0.02467	383	393	50765.3	1	22	30	169	0.0121	0.476	possibly correct	TRUE	R	F	TRUE		File Name: S_2-1.raw (F057099)	pep:novel scaffold:cavPor3:scaffold_10:34101089:34115102:1 gene:ENSCPOG00000008488 transcript:ENSCPOT00000008565	Cavia_porcellus.cavPor3.59.pep.fasta
Spectrum23882 scans:5422,	GkLDGNQDLIR	k2: Acetyl (+42.01)	ENSCPOP00000007630	Mito-rich	Mito_GP1	0.95	75.7	26.5	59.1	2.92	2	635.841	1269.67	1270.68	2	3.135e-05	0.02467	383	393	50765.3	1	22	30	169	0.0121	0.476	possibly correct	TRUE	R	F	TRUE		File Name: S_2-1.raw (F057099)	pep:novel scaffold:cavPor3:scaffold_10:34101089:34115102:1 gene:ENSCPOG00000008488 transcript:ENSCPOT00000008565	Cavia_porcellus.cavPor3.59.pep.fasta
Spectrum23371 scans:4816,	HAHGDQYkATDFVVDR	k8: Acetyl (+42.01)	ENSCPOP00000007630	Mito-rich	Mito_GP1	0.95	26.6	25	20.7	0.0132	2	475.979	1899.89	1900.89	4	-0.0003607	-0.1897	173	188	50765.3	1	22	30	169	0.0121	0.476	possibly correct	TRUE	R	A	TRUE		File Name: S_2-1.raw (F057099)	pep:novel scaffold:cavPor3:scaffold_10:34101089:34115102:1 gene:ENSCPOG00000008488 transcript:ENSCPOT00000008565	Cavia_porcellus.cavPor3.59.pep.fasta
Spectrum2495 scans:5098,	HAHGDQYkATDFVVDR	k8: Acetyl (+42.01)	ENSCPOP00000007630	Mito-rich	Mito_GP1	0.95	28	25	18.9	0.678	2	634.303	1899.89	1900.89	3	0.0002153	0.1133	173	188	50765.3	1	22	30	169	0.0121	0.476	possibly correct	TRUE	R	A	TRUE		File Name: S_2-1.raw (F057099)	pep:novel scaffold:cavPor3:scaffold_10:34101089:34115102:1 gene:ENSCPOG00000008488 transcript:ENSCPOT00000008565	Cavia_porcellus.cavPor3.59.pep.fasta
Spectrum32281 scans:4822,	HAHGDQYkATDFVVDR	k8: Acetyl (+42.01)	ENSCPOP00000007630	Mito-rich	Mito_GP1	0.95	28.8	25	25.8	5	2	950.95	1899.89	1900.89	2	-0.0007087	-0.3728	173	188	50765.3	1	22	30	169	0.0121	0.476	possibly correct	TRUE	R	A	TRUE		File Name: S_2-1.raw (F057099)	pep:novel scaffold:cavPor3:scaffold_10:34101089:34115102:1 gene:ENSCPOG00000008488 transcript:ENSCPOT00000008565	Cavia_porcellus.cavPor3.59.pep.fasta
Spectrum2148 scans:4699,	HAHGDQYkATDFVVDR	k8: Acetyl (+42.01)	ENSCPOP00000007630	Mito-rich	Mito_GP1	0.95	0	0	0	3.8	2	951.453	1900.89	1900.89	2	1.004	0.706	173	188	50765.3	1	22	30	169	0.0121	0.476	possibly correct	TRUE	R	A	TRUE		File Name: S_2-1.raw (F057099)	pep:novel scaffold:cavPor3:scaffold_10:34101089:34115102:1 gene:ENSCPOG00000008488 transcript:ENSCPOT00000008565	Cavia_porcellus.cavPor3.59.pep.fasta
Spectrum2105 scans:4653,	HAHGDQYkATDFVVDR	k8: Acetyl (+42.01)	ENSCPOP00000007630	Mito-rich	Mito_GP1	0.95	30	25	22.3	0	2	475.979	1899.89	1900.89	4	-0.001081	-0.5685	173	188	50765.3	1	22	30	169	0.0121	0.476	possibly correct	TRUE	R	A	TRUE		File Name: S_2-1.raw (F057099)	pep:novel scaffold:cavPor3:scaffold_10:34101089:34115102:1 gene:ENSCPOG00000008488 transcript:ENSCPOT00000008565	Cavia_porcellus.cavPor3.59.pep.fasta
Spectrum23389 scans:4838,	HAHGDQYkATDFVVDR	k8: Acetyl (+42.01)	ENSCPOP00000007630	Mito-rich	Mito_GP1	0.95	0	0	0	5.26	2	951.453	1900.89	1900.89	2	1.004	0.706	173	188	50765.3	1	22	30	169	0.0121	0.476	possibly correct	TRUE	R	A	TRUE		File Name: S_2-1.raw (F057099)	pep:novel scaffold:cavPor3:scaffold_10:34101089:34115102:1 gene:ENSCPOG00000008488 transcript:ENSCPOT00000008565	Cavia_porcellus.cavPor3.59.pep.fasta
Spectrum12023 scans:5961,	HAHGDQYkATDFVVDR	k8: Acetyl (+42.01)	ENSCPOP00000007630	Mito-rich	Mito_GP1	0.95	30.5	25	22.8	1.08	2	475.979	1899.89	1900.89	4	-0.0003607	-0.1897	173	188	50765.3	1	22	30	169	0.0121	0.476	possibly correct	TRUE	R	A	TRUE		File Name: S_2-1.raw (F057099)	pep:novel scaffold:cavPor3:scaffold_10:34101089:34115102:1 gene:ENSCPOG00000008488 transcript:ENSCPOT00000008565	Cavia_porcellus.cavPor3.59.pep.fasta
Spectrum2485 scans:5087,	HAHGDQYkATDFVVDR	k8: Acetyl (+42.01)	ENSCPOP00000007630	Mito-rich	Mito_GP1	0.95	31.9	25	25.5	0.796	2	634.303	1899.89	1900.89	3	-0.0003547	-0.1866	173	188	50765.3	1	22	30	169	0.0121	0.476	possibly correct	TRUE	R	A	TRUE		File Name: S_2-1.raw (F057099)	pep:novel scaffold:cavPor3:scaffold_10:34101089:34115102:1 gene:ENSCPOG00000008488 transcript:ENSCPOT00000008565	Cavia_porcellus.cavPor3.59.pep.fasta
Spectrum12149 scans:6096,	HAHGDQYkATDFVVDR	k8: Acetyl (+42.01)	ENSCPOP00000007630	Mito-rich	Mito_GP1	0.95	32.6	25	22.7	1.57	2	634.303	1899.89	1900.89	3	-0.0001747	-0.09188	173	188	50765.3	1	22	30	169	0.0121	0.476	possibly correct	TRUE	R	A	TRUE		File Name: S_2-1.raw (F057099)	pep:novel scaffold:cavPor3:scaffold_10:34101089:34115102:1 gene:ENSCPOG00000008488 transcript:ENSCPOT00000008565	Cavia_porcellus.cavPor3.59.pep.fasta
Spectrum2216 scans:4775,	HAHGDQYkATDFVVDR	k8: Acetyl (+42.01)	ENSCPOP00000007630	Mito-rich	Mito_GP1	0.95	32.8	25	25.7	0	2	475.979	1899.89	1900.89	4	-0.0003607	-0.1897	173	188	50765.3	1	22	30	169	0.0121	0.476	possibly correct	TRUE	R	A	TRUE		File Name: S_2-1.raw (F057099)	pep:novel scaffold:cavPor3:scaffold_10:34101089:34115102:1 gene:ENSCPOG00000008488 transcript:ENSCPOT00000008565	Cavia_porcellus.cavPor3.59.pep.fasta
Spectrum23552 scans:5031,	HAHGDQYkATDFVVDR	k8: Acetyl (+42.01)	ENSCPOP00000007630	Mito-rich	Mito_GP1	0.95	33.9	25	31	0.276	2	634.303	1899.89	1900.89	3	0.0002153	0.1133	173	188	50765.3	1	22	30	169	0.0121	0.476	possibly correct	TRUE	R	A	TRUE		File Name: S_2-1.raw (F057099)	pep:novel scaffold:cavPor3:scaffold_10:34101089:34115102:1 gene:ENSCPOG00000008488 transcript:ENSCPOT00000008565	Cavia_porcellus.cavPor3.59.pep.fasta
Spectrum23452 scans:4911,	HAHGDQYkATDFVVDR	k8: Acetyl (+42.01)	ENSCPOP00000007630	Mito-rich	Mito_GP1	0.95	37.4	25	27	2.19	2	634.303	1899.89	1900.89	3	0.001475	0.7761	173	188	50765.3	1	22	30	169	0.0121	0.476	possibly correct	TRUE	R	A	TRUE		File Name: S_2-1.raw (F057099)	pep:novel scaffold:cavPor3:scaffold_10:34101089:34115102:1 gene:ENSCPOG00000008488 transcript:ENSCPOT00000008565	Cavia_porcellus.cavPor3.59.pep.fasta
Spectrum2301 scans:4875,	HAHGDQYkATDFVVDR	k8: Acetyl (+42.01)	ENSCPOP00000007630	Mito-rich	Mito_GP1	0.95	39.3	25	35.7	1.59	2	634.303	1899.89	1900.89	3	0.0005753	0.3027	173	188	50765.3	1	22	30	169	0.0121	0.476	possibly correct	TRUE	R	A	TRUE		File Name: S_2-1.raw (F057099)	pep:novel scaffold:cavPor3:scaffold_10:34101089:34115102:1 gene:ENSCPOG00000008488 transcript:ENSCPOT00000008565	Cavia_porcellus.cavPor3.59.pep.fasta
Spectrum12109 scans:6053,	HAHGDQYkATDFVVDR	k8: Acetyl (+42.01)	ENSCPOP00000007630	Mito-rich	Mito_GP1	0.95	42.4	25	36.5	5.24	2	950.947	1899.88	1900.89	2	-0.007289	-3.834	173	188	50765.3	1	22	30	169	0.0121	0.476	possibly correct	TRUE	R	A	TRUE		File Name: S_2-1.raw (F057099)	pep:novel scaffold:cavPor3:scaffold_10:34101089:34115102:1 gene:ENSCPOG00000008488 transcript:ENSCPOT00000008565	Cavia_porcellus.cavPor3.59.pep.fasta
Spectrum32264 scans:4801,	HAHGDQYkATDFVVDR	k8: Acetyl (+42.01)	ENSCPOP00000007630	Mito-rich	Mito_GP1	0.95	44.5	25	31.4	3.17	2	634.303	1899.89	1900.89	3	0.001475	0.7761	173	188	50765.3	1	22	30	169	0.0121	0.476	possibly correct	TRUE	R	A	TRUE		File Name: S_2-1.raw (F057099)	pep:novel scaffold:cavPor3:scaffold_10:34101089:34115102:1 gene:ENSCPOG00000008488 transcript:ENSCPOT00000008565	Cavia_porcellus.cavPor3.59.pep.fasta
Spectrum12004 scans:5941,	HAHGDQYkATDFVVDR	k8: Acetyl (+42.01)	ENSCPOP00000007630	Mito-rich	Mito_GP1	0.95	45.1	25	36.2	1.77	2	634.303	1899.89	1900.89	3	0.0002153	0.1133	173	188	50765.3	1	22	30	169	0.0121	0.476	possibly correct	TRUE	R	A	TRUE		File Name: S_2-1.raw (F057099)	pep:novel scaffold:cavPor3:scaffold_10:34101089:34115102:1 gene:ENSCPOG00000008488 transcript:ENSCPOT00000008565	Cavia_porcellus.cavPor3.59.pep.fasta
Spectrum2197 scans:4754,	HAHGDQYkATDFVVDR	k8: Acetyl (+42.01)	ENSCPOP00000007630	Mito-rich	Mito_GP1	0.95	45.2	25	30.8	2.03	2	634.303	1899.89	1900.89	3	0.0005753	0.3027	173	188	50765.3	1	22	30	169	0.0121	0.476	possibly correct	TRUE	R	A	TRUE		File Name: S_2-1.raw (F057099)	pep:novel scaffold:cavPor3:scaffold_10:34101089:34115102:1 gene:ENSCPOG00000008488 transcript:ENSCPOT00000008565	Cavia_porcellus.cavPor3.59.pep.fasta
Spectrum2085 scans:4630,	HAHGDQYkATDFVVDR	k8: Acetyl (+42.01)	ENSCPOP00000007630	Mito-rich	Mito_GP1	0.95	47.5	25	41.1	1.72	2	634.303	1899.89	1900.89	3	-0.0005347	-0.2813	173	188	50765.3	1	22	30	169	0.0121	0.476	possibly correct	TRUE	R	A	TRUE		File Name: S_2-1.raw (F057099)	pep:novel scaffold:cavPor3:scaffold_10:34101089:34115102:1 gene:ENSCPOG00000008488 transcript:ENSCPOT00000008565	Cavia_porcellus.cavPor3.59.pep.fasta
Spectrum32214 scans:4741,	HAHGDQYkATDFVVDR	k8: Acetyl (+42.01)	ENSCPOP00000007630	Mito-rich	Mito_GP1	0.95	55.5	25	55.5	5.68	2	950.952	1899.89	1900.89	2	0.001871	0.9845	173	188	50765.3	1	22	30	169	0.0121	0.476	possibly correct	TRUE	R	A	TRUE		File Name: S_2-1.raw (F057099)	pep:novel scaffold:cavPor3:scaffold_10:34101089:34115102:1 gene:ENSCPOG00000008488 transcript:ENSCPOT00000008565	Cavia_porcellus.cavPor3.59.pep.fasta
Spectrum12048 scans:5987,	HAHGDQYkATDFVVDR	k8: Acetyl (+42.01)	ENSCPOP00000007630	Mito-rich	Mito_GP1	0.95	59	25	53.6	5.72	2	950.951	1899.89	1900.89	2	-8.865e-05	-0.04664	173	188	50765.3	1	22	30	169	0.0121	0.476	possibly correct	TRUE	R	A	TRUE		File Name: S_2-1.raw (F057099)	pep:novel scaffold:cavPor3:scaffold_10:34101089:34115102:1 gene:ENSCPOG00000008488 transcript:ENSCPOT00000008565	Cavia_porcellus.cavPor3.59.pep.fasta
Spectrum23399 scans:4850,	HAHGDQYkATDFVVDR	k8: Acetyl (+42.01)	ENSCPOP00000007630	Mito-rich	Mito_GP1	0.95	75.7	25	73.8	6.33	2	950.951	1899.89	1900.89	2	0.0003913	0.2059	173	188	50765.3	1	22	30	169	0.0121	0.476	possibly correct	TRUE	R	A	TRUE		File Name: S_2-1.raw (F057099)	pep:novel scaffold:cavPor3:scaffold_10:34101089:34115102:1 gene:ENSCPOG00000008488 transcript:ENSCPOT00000008565	Cavia_porcellus.cavPor3.59.pep.fasta
Spectrum30811 scans:2849,	HkIWYEHR	k2: Acetyl (+42.01)	ENSCPOP00000007630	Mito-rich	Mito_GP1	0.914	20.1	25.8	12.3	0.0706	2	404.208	1209.6	1210.61	3	-0.0009647	-0.7968	281	288	50765.3	1	22	30	169	0.0121	0.476	possibly correct	TRUE	K	L	TRUE		File Name: S_2-1.raw (F057099)	pep:novel scaffold:cavPor3:scaffold_10:34101089:34115102:1 gene:ENSCPOG00000008488 transcript:ENSCPOT00000008565	Cavia_porcellus.cavPor3.59.pep.fasta
Spectrum1166 scans:3492,	HkIWYEHR	k2: Acetyl (+42.01)	ENSCPOP00000007630	Mito-rich	Mito_GP1	0.932	24.5	25.8	16.7	-0.568	2	404.208	1209.6	1210.61	3	-0.0009647	-0.7968	281	288	50765.3	1	22	30	169	0.0121	0.476	possibly correct	TRUE	K	L	TRUE		File Name: S_2-1.raw (F057099)	pep:novel scaffold:cavPor3:scaffold_10:34101089:34115102:1 gene:ENSCPOG00000008488 transcript:ENSCPOT00000008565	Cavia_porcellus.cavPor3.59.pep.fasta
Spectrum922 scans:3125,	HkIWYEHR	k2: Acetyl (+42.01)	ENSCPOP00000007630	Mito-rich	Mito_GP1	0.95	22.4	25.7	19.3	0.481	2	404.209	1209.6	1210.61	3	-0.0001247	-0.103	281	288	50765.3	1	22	30	169	0.0121	0.476	possibly correct	TRUE	K	L	TRUE		File Name: S_2-1.raw (F057099)	pep:novel scaffold:cavPor3:scaffold_10:34101089:34115102:1 gene:ENSCPOG00000008488 transcript:ENSCPOT00000008565	Cavia_porcellus.cavPor3.59.pep.fasta
Spectrum978 scans:3213,	HkIWYEHR	k2: Acetyl (+42.01)	ENSCPOP00000007630	Mito-rich	Mito_GP1	0.95	23.3	25.8	19.1	-0.279	2	404.209	1209.6	1210.61	3	-0.0005747	-0.4747	281	288	50765.3	1	22	30	169	0.0121	0.476	possibly correct	TRUE	K	L	TRUE		File Name: S_2-1.raw (F057099)	pep:novel scaffold:cavPor3:scaffold_10:34101089:34115102:1 gene:ENSCPOG00000008488 transcript:ENSCPOT00000008565	Cavia_porcellus.cavPor3.59.pep.fasta
Spectrum1036 scans:3303,	HkIWYEHR	k2: Acetyl (+42.01)	ENSCPOP00000007630	Mito-rich	Mito_GP1	0.95	23.8	25.8	16.7	0	2	404.209	1209.6	1210.61	3	-0.0006647	-0.549	281	288	50765.3	1	22	30	169	0.0121	0.476	possibly correct	TRUE	K	L	TRUE		File Name: S_2-1.raw (F057099)	pep:novel scaffold:cavPor3:scaffold_10:34101089:34115102:1 gene:ENSCPOG00000008488 transcript:ENSCPOT00000008565	Cavia_porcellus.cavPor3.59.pep.fasta
Spectrum30911 scans:3013,	HkIWYEHR	k2: Acetyl (+42.01)	ENSCPOP00000007630	Mito-rich	Mito_GP1	0.95	24.3	25.7	12	-0.342	2	404.209	1209.6	1210.61	3	-0.0002147	-0.1773	281	288	50765.3	1	22	30	169	0.0121	0.476	possibly correct	TRUE	K	L	TRUE		File Name: S_2-1.raw (F057099)	pep:novel scaffold:cavPor3:scaffold_10:34101089:34115102:1 gene:ENSCPOG00000008488 transcript:ENSCPOT00000008565	Cavia_porcellus.cavPor3.59.pep.fasta
Spectrum1103 scans:3399,	HkIWYEHR	k2: Acetyl (+42.01)	ENSCPOP00000007630	Mito-rich	Mito_GP1	0.95	24.6	25.8	19.7	-0.0414	2	404.209	1209.6	1210.61	3	-0.0003047	-0.2517	281	288	50765.3	1	22	30	169	0.0121	0.476	possibly correct	TRUE	K	L	TRUE		File Name: S_2-1.raw (F057099)	pep:novel scaffold:cavPor3:scaffold_10:34101089:34115102:1 gene:ENSCPOG00000008488 transcript:ENSCPOT00000008565	Cavia_porcellus.cavPor3.59.pep.fasta
Spectrum22065 scans:3110,	HkIWYEHR	k2: Acetyl (+42.01)	ENSCPOP00000007630	Mito-rich	Mito_GP1	0.95	25.9	25.7	18.7	0.347	2	404.209	1209.6	1210.61	3	-0.0002147	-0.1773	281	288	50765.3	1	22	30	169	0.0121	0.476	possibly correct	TRUE	K	L	TRUE		File Name: S_2-1.raw (F057099)	pep:novel scaffold:cavPor3:scaffold_10:34101089:34115102:1 gene:ENSCPOG00000008488 transcript:ENSCPOT00000008565	Cavia_porcellus.cavPor3.59.pep.fasta
Spectrum10352 scans:4131,	HkIWYEHR	k2: Acetyl (+42.01)	ENSCPOP00000007630	Mito-rich	Mito_GP1	0.95	26.5	25.4	21.5	0	2	404.209	1209.6	1210.61	3	0.0004153	0.3431	281	288	50765.3	1	22	30	169	0.0121	0.476	possibly correct	TRUE	K	L	TRUE		File Name: S_2-1.raw (F057099)	pep:novel scaffold:cavPor3:scaffold_10:34101089:34115102:1 gene:ENSCPOG00000008488 transcript:ENSCPOT00000008565	Cavia_porcellus.cavPor3.59.pep.fasta
Spectrum30857 scans:2928,	HkIWYEHR	k2: Acetyl (+42.01)	ENSCPOP00000007630	Mito-rich	Mito_GP1	0.95	27.3	25.7	22.4	0.62	2	404.209	1209.6	1210.61	3	-0.0002147	-0.1773	281	288	50765.3	1	22	30	169	0.0121	0.476	possibly correct	TRUE	K	L	TRUE		File Name: S_2-1.raw (F057099)	pep:novel scaffold:cavPor3:scaffold_10:34101089:34115102:1 gene:ENSCPOG00000008488 transcript:ENSCPOT00000008565	Cavia_porcellus.cavPor3.59.pep.fasta
Spectrum22002 scans:3018,	HkIWYEHR	k2: Acetyl (+42.01)	ENSCPOP00000007630	Mito-rich	Mito_GP1	0.95	29	25.7	20	0.699	2	404.209	1209.6	1210.61	3	-0.0002147	-0.1773	281	288	50765.3	1	22	30	169	0.0121	0.476	possibly correct	TRUE	K	L	TRUE		File Name: S_2-1.raw (F057099)	pep:novel scaffold:cavPor3:scaffold_10:34101089:34115102:1 gene:ENSCPOG00000008488 transcript:ENSCPOT00000008565	Cavia_porcellus.cavPor3.59.pep.fasta
Spectrum10201 scans:3956,	HkIWYEHR	k2: Acetyl (+42.01)	ENSCPOP00000007630	Mito-rich	Mito_GP1	0.95	34.4	25.8	30.4	-0.362	2	404.209	1209.6	1210.61	3	-0.0005747	-0.4747	281	288	50765.3	1	22	30	169	0.0121	0.476	possibly correct	TRUE	K	L	TRUE		File Name: S_2-1.raw (F057099)	pep:novel scaffold:cavPor3:scaffold_10:34101089:34115102:1 gene:ENSCPOG00000008488 transcript:ENSCPOT00000008565	Cavia_porcellus.cavPor3.59.pep.fasta
Spectrum21667 scans:2474,	HYkTDFDK	k3: Acetyl (+42.01)	ENSCPOP00000007630	Mito-rich	Mito_GP1	0.95	22	25	12	1.08	2	548.259	1094.5	1095.51	2	-0.0005287	-0.4826	273	280	50765.3	1	22	30	169	0.0121	0.476	possibly correct	TRUE	K	H	TRUE		File Name: S_2-1.raw (F057099)	pep:novel scaffold:cavPor3:scaffold_10:34101089:34115102:1 gene:ENSCPOG00000008488 transcript:ENSCPOT00000008565	Cavia_porcellus.cavPor3.59.pep.fasta
Spectrum9463 scans:3064,	HYkTDFDK	k3: Acetyl (+42.01)	ENSCPOP00000007630	Mito-rich	Mito_GP1	0.95	30	25	14.4	2.05	2	548.259	1094.5	1095.51	2	7.135e-05	0.06513	273	280	50765.3	1	22	30	169	0.0121	0.476	possibly correct	TRUE	K	H	TRUE		File Name: S_2-1.raw (F057099)	pep:novel scaffold:cavPor3:scaffold_10:34101089:34115102:1 gene:ENSCPOG00000008488 transcript:ENSCPOT00000008565	Cavia_porcellus.cavPor3.59.pep.fasta
Spectrum635 scans:2635,	HYkTDFDK	k3: Acetyl (+42.01)	ENSCPOP00000007630	Mito-rich	Mito_GP1	0.95	30.1	25	13.1	1.01	2	548.259	1094.5	1095.51	2	7.135e-05	0.06513	273	280	50765.3	1	22	30	169	0.0121	0.476	possibly correct	TRUE	K	H	TRUE		File Name: S_2-1.raw (F057099)	pep:novel scaffold:cavPor3:scaffold_10:34101089:34115102:1 gene:ENSCPOG00000008488 transcript:ENSCPOT00000008565	Cavia_porcellus.cavPor3.59.pep.fasta
Spectrum677 scans:2711,	HYkTDFDK	k3: Acetyl (+42.01)	ENSCPOP00000007630	Mito-rich	Mito_GP1	0.95	33.4	25	23.7	0.0915	2	548.259	1094.5	1095.51	2	-0.0002887	-0.2635	273	280	50765.3	1	22	30	169	0.0121	0.476	possibly correct	TRUE	K	H	TRUE		File Name: S_2-1.raw (F057099)	pep:novel scaffold:cavPor3:scaffold_10:34101089:34115102:1 gene:ENSCPOG00000008488 transcript:ENSCPOT00000008565	Cavia_porcellus.cavPor3.59.pep.fasta
Spectrum21721 scans:2560,	HYkTDFDK	k3: Acetyl (+42.01)	ENSCPOP00000007630	Mito-rich	Mito_GP1	0.95	39.2	25	29.3	1.23	2	548.259	1094.5	1095.51	2	0.0001913	0.1747	273	280	50765.3	1	22	30	169	0.0121	0.476	possibly correct	TRUE	K	H	TRUE		File Name: S_2-1.raw (F057099)	pep:novel scaffold:cavPor3:scaffold_10:34101089:34115102:1 gene:ENSCPOG00000008488 transcript:ENSCPOT00000008565	Cavia_porcellus.cavPor3.59.pep.fasta
Spectrum561 scans:2505,	HYkTDFDK	k3: Acetyl (+42.01)	ENSCPOP00000007630	Mito-rich	Mito_GP1	0.95	43.7	25	30.1	1.08	2	548.259	1094.5	1095.51	2	-0.0002887	-0.2635	273	280	50765.3	1	22	30	169	0.0121	0.476	possibly correct	TRUE	K	H	TRUE		File Name: S_2-1.raw (F057099)	pep:novel scaffold:cavPor3:scaffold_10:34101089:34115102:1 gene:ENSCPOG00000008488 transcript:ENSCPOT00000008565	Cavia_porcellus.cavPor3.59.pep.fasta
Spectrum8788 scans:2131,	HYkTDFDKHK	k3: Acetyl (+42.01)	ENSCPOP00000007630	Mito-rich	Mito_GP1	0.95	25	26	19.8	-0.23	2	454.226	1359.66	1360.66	3	-0.0004747	-0.3488	273	282	50765.3	1	22	30	169	0.0121	0.476	possibly correct	TRUE	K	I	TRUE		File Name: S_2-1.raw (F057099)	pep:novel scaffold:cavPor3:scaffold_10:34101089:34115102:1 gene:ENSCPOG00000008488 transcript:ENSCPOT00000008565	Cavia_porcellus.cavPor3.59.pep.fasta
Spectrum9636 scans:3273,	HYkTDFDkHK	k3: Acetyl (+42.01), k8: Acetyl (+42.01)	ENSCPOP00000007630	Mito-rich	Mito_GP1	0.95	28	25	6.11	-0.342	2	468.23	1401.67	1402.68	3	-0.0003314	-0.2362	273	282	50765.3	1	22	30	169	0.0121	0.476	possibly correct	TRUE	K	I	TRUE		File Name: S_2-1.raw (F057099)	pep:novel scaffold:cavPor3:scaffold_10:34101089:34115102:1 gene:ENSCPOG00000008488 transcript:ENSCPOT00000008565	Cavia_porcellus.cavPor3.59.pep.fasta
Spectrum29352 scans:11370,	LNEHFLNTTDFLDTIkSNLDK	k16: Acetyl (+42.01)	ENSCPOP00000007630	Mito-rich	Mito_GP1	0.95	30.6	29	16.7	-0.0792	2	840.759	2519.26	2520.26	3	0.001455	0.5775	427	447	50765.3	1	22	30	169	0.0121	0.476	possibly correct	TRUE	K	A	TRUE		File Name: S_2-1.raw (F057099)	pep:novel scaffold:cavPor3:scaffold_10:34101089:34115102:1 gene:ENSCPOG00000008488 transcript:ENSCPOT00000008565	Cavia_porcellus.cavPor3.59.pep.fasta
Spectrum38074 scans:11215,	LNEHFLNTTDFLDTIkSNLDK	k16: Acetyl (+42.01)	ENSCPOP00000007630	Mito-rich	Mito_GP1	0.95	34.9	29	26.1	0.678	2	840.759	2519.26	2520.26	3	0.001635	0.6489	427	447	50765.3	1	22	30	169	0.0121	0.476	possibly correct	TRUE	K	A	TRUE		File Name: S_2-1.raw (F057099)	pep:novel scaffold:cavPor3:scaffold_10:34101089:34115102:1 gene:ENSCPOG00000008488 transcript:ENSCPOT00000008565	Cavia_porcellus.cavPor3.59.pep.fasta
Spectrum7545 scans:10514,	LNEHFLNTTDFLDTIkSNLDK	k16: Acetyl (+42.01)	ENSCPOP00000007630	Mito-rich	Mito_GP1	0.95	43.6	28.9	24.6	1.52	2	840.759	2519.25	2520.26	3	-0.0003747	-0.1487	427	447	50765.3	1	22	30	169	0.0121	0.476	possibly correct	TRUE	K	A	TRUE		File Name: S_2-1.raw (F057099)	pep:novel scaffold:cavPor3:scaffold_10:34101089:34115102:1 gene:ENSCPOG00000008488 transcript:ENSCPOT00000008565	Cavia_porcellus.cavPor3.59.pep.fasta
Spectrum38020 scans:11151,	LNEHFLNTTDFLDTIkSNLDK	k16: Acetyl (+42.01)	ENSCPOP00000007630	Mito-rich	Mito_GP1	0.95	44.3	29	29.8	0.602	2	840.759	2519.26	2520.26	3	0.0003453	0.137	427	447	50765.3	1	22	30	169	0.0121	0.476	possibly correct	TRUE	K	A	TRUE		File Name: S_2-1.raw (F057099)	pep:novel scaffold:cavPor3:scaffold_10:34101089:34115102:1 gene:ENSCPOG00000008488 transcript:ENSCPOT00000008565	Cavia_porcellus.cavPor3.59.pep.fasta
Spectrum38018 scans:11148,	LNEHFLNTTDFLDTIkSNLDK	k16: Acetyl (+42.01)	ENSCPOP00000007630	Mito-rich	Mito_GP1	0.95	44.4	29	31.6	0.824	2	840.76	2519.26	2520.26	3	0.002535	1.006	427	447	50765.3	1	22	30	169	0.0121	0.476	possibly correct	TRUE	K	A	TRUE		File Name: S_2-1.raw (F057099)	pep:novel scaffold:cavPor3:scaffold_10:34101089:34115102:1 gene:ENSCPOG00000008488 transcript:ENSCPOT00000008565	Cavia_porcellus.cavPor3.59.pep.fasta
Spectrum29288 scans:11295,	LNEHFLNTTDFLDTIkSNLDK	k16: Acetyl (+42.01)	ENSCPOP00000007630	Mito-rich	Mito_GP1	0.95	53	28.9	37.1	1.52	2	840.759	2519.25	2520.26	3	0.0001653	0.06561	427	447	50765.3	1	22	30	169	0.0121	0.476	possibly correct	TRUE	K	A	TRUE		File Name: S_2-1.raw (F057099)	pep:novel scaffold:cavPor3:scaffold_10:34101089:34115102:1 gene:ENSCPOG00000008488 transcript:ENSCPOT00000008565	Cavia_porcellus.cavPor3.59.pep.fasta
Spectrum36245 scans:9221,	LVPGWTkPITIGR	k7: Acetyl (+42.01)	ENSCPOP00000007630	Mito-rich	Mito_GP1	0.95	38.9	25	36	-0.398	2	740.438	1478.86	1479.87	2	0.001171	0.7915	160	172	50765.3	1	22	30	169	0.0121	0.476	possibly correct	TRUE	R	H	TRUE		File Name: S_2-1.raw (F057099)	pep:novel scaffold:cavPor3:scaffold_10:34101089:34115102:1 gene:ENSCPOG00000008488 transcript:ENSCPOT00000008565	Cavia_porcellus.cavPor3.59.pep.fasta
Spectrum5840 scans:8705,	LVPGWTkPITIGR	k7: Acetyl (+42.01)	ENSCPOP00000007630	Mito-rich	Mito_GP1	0.95	52.9	25	48.6	0.921	2	740.438	1478.86	1479.87	2	0.0009113	0.6158	160	172	50765.3	1	22	30	169	0.0121	0.476	possibly correct	TRUE	R	H	TRUE		File Name: S_2-1.raw (F057099)	pep:novel scaffold:cavPor3:scaffold_10:34101089:34115102:1 gene:ENSCPOG00000008488 transcript:ENSCPOT00000008565	Cavia_porcellus.cavPor3.59.pep.fasta
Spectrum10385 scans:4168,	mVFTPkDGSGPK	m1: Oxidation (+15.99), k6: Acetyl (+42.01)	ENSCPOP00000007630	Mito-rich	Mito_GP1	0.904	22	25.9	12	0.824	2	661.329	1320.64	1321.65	2	0.004396	3.326	194	205	50765.3	1	22	30	169	0.0121	0.476	possibly correct	TRUE	R	E	TRUE		File Name: S_2-1.raw (F057099)	pep:novel scaffold:cavPor3:scaffold_10:34101089:34115102:1 gene:ENSCPOG00000008488 transcript:ENSCPOT00000008565	Cavia_porcellus.cavPor3.59.pep.fasta
Spectrum10641 scans:4453,	mVFTPkDGSGPK	m1: Oxidation (+15.99), k6: Acetyl (+42.01)	ENSCPOP00000007630	Mito-rich	Mito_GP1	0.95	25.9	25	7.73	1.11	2	661.327	1320.64	1321.65	2	0.0002363	0.1788	194	205	50765.3	1	22	30	169	0.0121	0.476	possibly correct	TRUE	R	E	TRUE		File Name: S_2-1.raw (F057099)	pep:novel scaffold:cavPor3:scaffold_10:34101089:34115102:1 gene:ENSCPOG00000008488 transcript:ENSCPOT00000008565	Cavia_porcellus.cavPor3.59.pep.fasta
Spectrum31115 scans:3303,	mVFTPkDGSGPK	m1: Oxidation (+15.99), k6: Acetyl (+42.01)	ENSCPOP00000007630	Mito-rich	Mito_GP1	0.95	25.9	25	10.5	1.25	2	661.327	1320.64	1321.65	2	0.0002363	0.1788	194	205	50765.3	1	22	30	169	0.0121	0.476	possibly correct	TRUE	R	E	TRUE		File Name: S_2-1.raw (F057099)	pep:novel scaffold:cavPor3:scaffold_10:34101089:34115102:1 gene:ENSCPOG00000008488 transcript:ENSCPOT00000008565	Cavia_porcellus.cavPor3.59.pep.fasta
Spectrum1088 scans:3378,	mVFTPkDGSGPK	m1: Oxidation (+15.99), k6: Acetyl (+42.01)	ENSCPOP00000007630	Mito-rich	Mito_GP1	0.95	30.3	25	13.6	2.12	2	661.327	1320.64	1321.65	2	0.0003563	0.2696	194	205	50765.3	1	22	30	169	0.0121	0.476	possibly correct	TRUE	R	E	TRUE		File Name: S_2-1.raw (F057099)	pep:novel scaffold:cavPor3:scaffold_10:34101089:34115102:1 gene:ENSCPOG00000008488 transcript:ENSCPOT00000008565	Cavia_porcellus.cavPor3.59.pep.fasta
Spectrum982 scans:3218,	mVFTPkDGSGPK	m1: Oxidation (+15.99), k6: Acetyl (+42.01)	ENSCPOP00000007630	Mito-rich	Mito_GP1	0.95	30.7	25.1	9.51	1.7	2	661.326	1320.64	1321.65	2	-0.001104	-0.8351	194	205	50765.3	1	22	30	169	0.0121	0.476	possibly correct	TRUE	R	E	TRUE		File Name: S_2-1.raw (F057099)	pep:novel scaffold:cavPor3:scaffold_10:34101089:34115102:1 gene:ENSCPOG00000008488 transcript:ENSCPOT00000008565	Cavia_porcellus.cavPor3.59.pep.fasta
Spectrum10631 scans:4442,	mVFTPKDGSGPk	m1: Oxidation (+15.99), k12: Acetyl (+42.01)	ENSCPOP00000007630	Mito-rich	Mito_GP1	0.95	35	25.4	0	1.37	2	661.327	1320.64	1321.65	2	0.001216	0.9203	194	205	50765.3	1	22	30	169	0.0121	0.476	possibly correct	TRUE	R	E	TRUE		File Name: S_2-1.raw (F057099)	pep:novel scaffold:cavPor3:scaffold_10:34101089:34115102:1 gene:ENSCPOG00000008488 transcript:ENSCPOT00000008565	Cavia_porcellus.cavPor3.59.pep.fasta
Spectrum31113 scans:3300,	mVFTPkDGSGPK	m1: Oxidation (+15.99), k6: Acetyl (+42.01)	ENSCPOP00000007630	Mito-rich	Mito_GP1	0.95	38.5	25	16.3	2.96	2	661.327	1320.64	1321.65	2	0.0003563	0.2696	194	205	50765.3	1	22	30	169	0.0121	0.476	possibly correct	TRUE	R	E	TRUE		File Name: S_2-1.raw (F057099)	pep:novel scaffold:cavPor3:scaffold_10:34101089:34115102:1 gene:ENSCPOG00000008488 transcript:ENSCPOT00000008565	Cavia_porcellus.cavPor3.59.pep.fasta
Spectrum11881 scans:5808,	MVFTPkDGSGPK	k6: Acetyl (+42.01)	ENSCPOP00000007630	Mito-rich	Mito_GP1	0.95	40.5	26	11.6	1.6	2	653.329	1304.64	1305.65	2	0.0001513	0.1159	194	205	50765.3	1	22	30	169	0.0121	0.476	possibly correct	TRUE	R	E	TRUE		File Name: S_2-1.raw (F057099)	pep:novel scaffold:cavPor3:scaffold_10:34101089:34115102:1 gene:ENSCPOG00000008488 transcript:ENSCPOT00000008565	Cavia_porcellus.cavPor3.59.pep.fasta
Spectrum23232 scans:4649,	MVFTPKDGSGPk	k12: Acetyl (+42.01)	ENSCPOP00000007630	Mito-rich	Mito_GP1	0.95	43.2	26.2	0	2.34	2	653.33	1304.64	1305.65	2	0.0006513	0.4989	194	205	50765.3	1	22	30	169	0.0121	0.476	possibly correct	TRUE	R	E	TRUE		File Name: S_2-1.raw (F057099)	pep:novel scaffold:cavPor3:scaffold_10:34101089:34115102:1 gene:ENSCPOG00000008488 transcript:ENSCPOT00000008565	Cavia_porcellus.cavPor3.59.pep.fasta
Spectrum10499 scans:4298,	mVFTPkDGSGPK	m1: Oxidation (+15.99), k6: Acetyl (+42.01)	ENSCPOP00000007630	Mito-rich	Mito_GP1	0.95	45	25	15.2	4.25	2	661.327	1320.64	1321.65	2	0.0004763	0.3604	194	205	50765.3	1	22	30	169	0.0121	0.476	possibly correct	TRUE	R	E	TRUE		File Name: S_2-1.raw (F057099)	pep:novel scaffold:cavPor3:scaffold_10:34101089:34115102:1 gene:ENSCPOG00000008488 transcript:ENSCPOT00000008565	Cavia_porcellus.cavPor3.59.pep.fasta
Spectrum22258 scans:3379,	mVFTPkDGSGPK	m1: Oxidation (+15.99), k6: Acetyl (+42.01)	ENSCPOP00000007630	Mito-rich	Mito_GP1	0.95	49.2	25	33	1.7	2	661.326	1320.64	1321.65	2	-0.0006237	-0.4719	194	205	50765.3	1	22	30	169	0.0121	0.476	possibly correct	TRUE	R	E	TRUE		File Name: S_2-1.raw (F057099)	pep:novel scaffold:cavPor3:scaffold_10:34101089:34115102:1 gene:ENSCPOG00000008488 transcript:ENSCPOT00000008565	Cavia_porcellus.cavPor3.59.pep.fasta
Spectrum1894 scans:4412,	MVFTPkDGSGPK	k6: Acetyl (+42.01)	ENSCPOP00000007630	Mito-rich	Mito_GP1	0.95	50.5	26	19	1.27	2	653.329	1304.64	1305.65	2	0.0001513	0.1159	194	205	50765.3	1	22	30	169	0.0121	0.476	possibly correct	TRUE	R	E	TRUE		File Name: S_2-1.raw (F057099)	pep:novel scaffold:cavPor3:scaffold_10:34101089:34115102:1 gene:ENSCPOG00000008488 transcript:ENSCPOT00000008565	Cavia_porcellus.cavPor3.59.pep.fasta
Spectrum22330 scans:3480,	mVFTPkDGSGPK	m1: Oxidation (+15.99), k6: Acetyl (+42.01)	ENSCPOP00000007630	Mito-rich	Mito_GP1	0.95	57.9	25	25.2	4.36	2	661.327	1320.64	1321.65	2	0.0001163	0.08803	194	205	50765.3	1	22	30	169	0.0121	0.476	possibly correct	TRUE	R	E	TRUE		File Name: S_2-1.raw (F057099)	pep:novel scaffold:cavPor3:scaffold_10:34101089:34115102:1 gene:ENSCPOG00000008488 transcript:ENSCPOT00000008565	Cavia_porcellus.cavPor3.59.pep.fasta
Spectrum31187 scans:3403,	mVFTPkDGSGPK	m1: Oxidation (+15.99), k6: Acetyl (+42.01)	ENSCPOP00000007630	Mito-rich	Mito_GP1	0.95	61.2	25	18	5.68	2	661.327	1320.64	1321.65	2	0.0001163	0.08803	194	205	50765.3	1	22	30	169	0.0121	0.476	possibly correct	TRUE	R	E	TRUE		File Name: S_2-1.raw (F057099)	pep:novel scaffold:cavPor3:scaffold_10:34101089:34115102:1 gene:ENSCPOG00000008488 transcript:ENSCPOT00000008565	Cavia_porcellus.cavPor3.59.pep.fasta
Spectrum1037 scans:3305,	mVFTPkDGSGPK	m1: Oxidation (+15.99), k6: Acetyl (+42.01)	ENSCPOP00000007630	Mito-rich	Mito_GP1	0.95	64.4	25	31.5	4.1	2	661.327	1320.64	1321.65	2	0.0001163	0.08803	194	205	50765.3	1	22	30	169	0.0121	0.476	possibly correct	TRUE	R	E	TRUE		File Name: S_2-1.raw (F057099)	pep:novel scaffold:cavPor3:scaffold_10:34101089:34115102:1 gene:ENSCPOG00000008488 transcript:ENSCPOT00000008565	Cavia_porcellus.cavPor3.59.pep.fasta
Spectrum11296 scans:5185,	mWkSPNGTIR	m1: Oxidation (+15.99), k3: Acetyl (+42.01)	ENSCPOP00000007630	Mito-rich	Mito_GP1	0.95	33.8	26	27.8	2.25	2	624.314	1246.61	1247.62	2	-6.366e-05	-0.05103	131	140	50765.3	1	22	30	169	0.0121	0.476	possibly correct	TRUE	K	N	TRUE		File Name: S_2-1.raw (F057099)	pep:novel scaffold:cavPor3:scaffold_10:34101089:34115102:1 gene:ENSCPOG00000008488 transcript:ENSCPOT00000008565	Cavia_porcellus.cavPor3.59.pep.fasta
Spectrum1506 scans:3953,	mWkSPNGTIR	m1: Oxidation (+15.99), k3: Acetyl (+42.01)	ENSCPOP00000007630	Mito-rich	Mito_GP1	0.95	36.3	26	23	1.24	2	624.314	1246.61	1247.62	2	0.0001763	0.1413	131	140	50765.3	1	22	30	169	0.0121	0.476	possibly correct	TRUE	K	N	TRUE		File Name: S_2-1.raw (F057099)	pep:novel scaffold:cavPor3:scaffold_10:34101089:34115102:1 gene:ENSCPOG00000008488 transcript:ENSCPOT00000008565	Cavia_porcellus.cavPor3.59.pep.fasta
Spectrum27939 scans:9842,	NILGGTVFREPIIckNIPR	c14: Carbamidomethyl (+57.02), k15: Acetyl (+42.01)	ENSCPOP00000007630	Mito-rich	Mito_GP1	0.95	40.8	27.2	34.3	1.22	2	747.085	2238.23	2239.24	3	0.00277	1.237	141	159	50765.3	1	22	30	169	0.0121	0.476	possibly correct	TRUE	R	L	TRUE		File Name: S_2-1.raw (F057099)	pep:novel scaffold:cavPor3:scaffold_10:34101089:34115102:1 gene:ENSCPOG00000008488 transcript:ENSCPOT00000008565	Cavia_porcellus.cavPor3.59.pep.fasta
Spectrum16956 scans:11177,	NILGGTVFREPIIckNIPR	c14: Carbamidomethyl (+57.02), k15: Acetyl (+42.01)	ENSCPOP00000007630	Mito-rich	Mito_GP1	0.95	41.5	26.8	30.7	1.07	2	747.086	2238.24	2239.24	3	0.00442	1.974	141	159	50765.3	1	22	30	169	0.0121	0.476	possibly correct	TRUE	R	L	TRUE		File Name: S_2-1.raw (F057099)	pep:novel scaffold:cavPor3:scaffold_10:34101089:34115102:1 gene:ENSCPOG00000008488 transcript:ENSCPOT00000008565	Cavia_porcellus.cavPor3.59.pep.fasta
Spectrum6237 scans:9123,	NILGGTVFREPIIckNIPR	c14: Carbamidomethyl (+57.02), k15: Acetyl (+42.01)	ENSCPOP00000007630	Mito-rich	Mito_GP1	0.95	48.4	27.1	40.1	2.39	2	747.085	2238.23	2239.24	3	0.00187	0.8351	141	159	50765.3	1	22	30	169	0.0121	0.476	possibly correct	TRUE	R	L	TRUE		File Name: S_2-1.raw (F057099)	pep:novel scaffold:cavPor3:scaffold_10:34101089:34115102:1 gene:ENSCPOG00000008488 transcript:ENSCPOT00000008565	Cavia_porcellus.cavPor3.59.pep.fasta
Spectrum36737 scans:9740,	NILGGTVFREPIIckNIPR	c14: Carbamidomethyl (+57.02), k15: Acetyl (+42.01)	ENSCPOP00000007630	Mito-rich	Mito_GP1	0.95	49.5	27	39.8	2.89	2	747.085	2238.23	2239.24	3	0.00223	0.9959	141	159	50765.3	1	22	30	169	0.0121	0.476	possibly correct	TRUE	R	L	TRUE		File Name: S_2-1.raw (F057099)	pep:novel scaffold:cavPor3:scaffold_10:34101089:34115102:1 gene:ENSCPOG00000008488 transcript:ENSCPOT00000008565	Cavia_porcellus.cavPor3.59.pep.fasta
Spectrum12258 scans:6211,	NTILkAYDGR	k5: Acetyl (+42.01)	ENSCPOP00000007630	Mito-rich	Mito_GP1	0.95	41.5	26.4	37.5	2.37	2	596.82	1191.63	1192.63	2	0.0005313	0.4455	252	261	50765.3	1	22	30	169	0.0121	0.476	possibly correct	TRUE	K	F	TRUE		File Name: S_2-1.raw (F057099)	pep:novel scaffold:cavPor3:scaffold_10:34101089:34115102:1 gene:ENSCPOG00000008488 transcript:ENSCPOT00000008565	Cavia_porcellus.cavPor3.59.pep.fasta
Spectrum31178 scans:3387,	SNLDkALGK	k5: Acetyl (+42.01)	ENSCPOP00000007630	Mito-rich	Mito_GP1	0.95	41.7	26.5	27.8	1.47	2	494.277	986.54	987.547	2	-0.0001287	-0.1303	443	451	50765.3	1	22	30	169	0.0121	0.476	possibly correct	TRUE	K	-	TRUE		File Name: S_2-1.raw (F057099)	pep:novel scaffold:cavPor3:scaffold_10:34101089:34115102:1 gene:ENSCPOG00000008488 transcript:ENSCPOT00000008565	Cavia_porcellus.cavPor3.59.pep.fasta
Spectrum31239 scans:3479,	SNLDkALGK	k5: Acetyl (+42.01)	ENSCPOP00000007630	Mito-rich	Mito_GP1	0.95	45	26.5	28.4	1.72	2	494.277	986.54	987.547	2	-6.865e-05	-0.06952	443	451	50765.3	1	22	30	169	0.0121	0.476	possibly correct	TRUE	K	-	TRUE		File Name: S_2-1.raw (F057099)	pep:novel scaffold:cavPor3:scaffold_10:34101089:34115102:1 gene:ENSCPOG00000008488 transcript:ENSCPOT00000008565	Cavia_porcellus.cavPor3.59.pep.fasta
Spectrum1112 scans:3412,	SNLDkALGK	k5: Acetyl (+42.01)	ENSCPOP00000007630	Mito-rich	Mito_GP1	0.95	49	27	30	1.07	2	494.277	986.539	987.547	2	-0.0003087	-0.3125	443	451	50765.3	1	22	30	169	0.0121	0.476	possibly correct	TRUE	K	-	TRUE		File Name: S_2-1.raw (F057099)	pep:novel scaffold:cavPor3:scaffold_10:34101089:34115102:1 gene:ENSCPOG00000008488 transcript:ENSCPOT00000008565	Cavia_porcellus.cavPor3.59.pep.fasta
Spectrum22315 scans:3458,	SNLDkALGK	k5: Acetyl (+42.01)	ENSCPOP00000007630	Mito-rich	Mito_GP1	0.95	51.7	26.5	35.4	1.42	2	494.277	986.54	987.547	2	-0.0001887	-0.191	443	451	50765.3	1	22	30	169	0.0121	0.476	possibly correct	TRUE	K	-	TRUE		File Name: S_2-1.raw (F057099)	pep:novel scaffold:cavPor3:scaffold_10:34101089:34115102:1 gene:ENSCPOG00000008488 transcript:ENSCPOT00000008565	Cavia_porcellus.cavPor3.59.pep.fasta
Spectrum10596 scans:4404,	SNLDkALGK	k5: Acetyl (+42.01)	ENSCPOP00000007630	Mito-rich	Mito_GP1	0.95	52.6	27	35.2	1.46	2	494.277	986.54	987.547	2	-0.0002487	-0.2518	443	451	50765.3	1	22	30	169	0.0121	0.476	possibly correct	TRUE	K	-	TRUE		File Name: S_2-1.raw (F057099)	pep:novel scaffold:cavPor3:scaffold_10:34101089:34115102:1 gene:ENSCPOG00000008488 transcript:ENSCPOT00000008565	Cavia_porcellus.cavPor3.59.pep.fasta
Spectrum1051 scans:3322,	SNLDkALGK	k5: Acetyl (+42.01)	ENSCPOP00000007630	Mito-rich	Mito_GP1	0.95	56.4	27	32	1.05	2	494.277	986.539	987.547	2	-0.0003087	-0.3125	443	451	50765.3	1	22	30	169	0.0121	0.476	possibly correct	TRUE	K	-	TRUE		File Name: S_2-1.raw (F057099)	pep:novel scaffold:cavPor3:scaffold_10:34101089:34115102:1 gene:ENSCPOG00000008488 transcript:ENSCPOT00000008565	Cavia_porcellus.cavPor3.59.pep.fasta
Spectrum22382 scans:3555,	SNLDkALGK	k5: Acetyl (+42.01)	ENSCPOP00000007630	Mito-rich	Mito_GP1	0.95	56.3	26.5	34.7	1.96	2	494.277	986.54	987.547	2	-0.0001287	-0.1303	443	451	50765.3	1	22	30	169	0.0121	0.476	possibly correct	TRUE	K	-	TRUE		File Name: S_2-1.raw (F057099)	pep:novel scaffold:cavPor3:scaffold_10:34101089:34115102:1 gene:ENSCPOG00000008488 transcript:ENSCPOT00000008565	Cavia_porcellus.cavPor3.59.pep.fasta
Spectrum1104 scans:3400,	SNLDkALGKQ	k5: Acetyl (+42.01)	ENSCPOP00000007630	Mito-rich	Mito_GP1	0.95	43.7	27.8	20.5	2.68	2	558.307	1114.6	1115.61	2	0.0007713	0.6914	443	452	50765.3	1	22	30	169	0.0121	0.476	possibly correct	TRUE	K	-	TRUE		File Name: S_2-1.raw (F057099)	pep:novel scaffold:cavPor3:scaffold_10:34101089:34115102:1 gene:ENSCPOG00000008488 transcript:ENSCPOT00000008565	Cavia_porcellus.cavPor3.59.pep.fasta
Spectrum31241 scans:3481,	SNLDkALGKQ	k5: Acetyl (+42.01)	ENSCPOP00000007630	Mito-rich	Mito_GP1	0.95	49.4	27.8	29.6	2.37	2	558.307	1114.6	1115.61	2	0.0002913	0.2612	443	452	50765.3	1	22	30	169	0.0121	0.476	possibly correct	TRUE	K	-	TRUE		File Name: S_2-1.raw (F057099)	pep:novel scaffold:cavPor3:scaffold_10:34101089:34115102:1 gene:ENSCPOG00000008488 transcript:ENSCPOT00000008565	Cavia_porcellus.cavPor3.59.pep.fasta
Spectrum22371 scans:3538,	SNLDkALGKQ	k5: Acetyl (+42.01)	ENSCPOP00000007630	Mito-rich	Mito_GP1	0.95	57.8	27.8	41.4	2.51	2	558.307	1114.6	1115.61	2	0.0001713	0.1536	443	452	50765.3	1	22	30	169	0.0121	0.476	possibly correct	TRUE	K	-	TRUE		File Name: S_2-1.raw (F057099)	pep:novel scaffold:cavPor3:scaffold_10:34101089:34115102:1 gene:ENSCPOG00000008488 transcript:ENSCPOT00000008565	Cavia_porcellus.cavPor3.59.pep.fasta
Spectrum21144 scans:1470,	TDFDKHk	k7: Acetyl (+42.01)	ENSCPOP00000007630	Mito-rich	Mito_GP1	0.95	30.3	25	3.06	0.495	2	466.727	931.44	932.447	2	-0.0004687	-0.5026	276	282	50765.3	1	22	30	169	0.0121	0.476	possibly correct	TRUE	K	I	TRUE		File Name: S_2-1.raw (F057099)	pep:novel scaffold:cavPor3:scaffold_10:34101089:34115102:1 gene:ENSCPOG00000008488 transcript:ENSCPOT00000008565	Cavia_porcellus.cavPor3.59.pep.fasta
Spectrum21131 scans:1423,	TDFDkHK	k5: Acetyl (+42.01)	ENSCPOP00000007630	Mito-rich	Mito_GP1	0.95	30.5	25	13.8	0.284	2	466.727	931.439	932.447	2	-0.0008287	-0.8887	276	282	50765.3	1	22	30	169	0.0121	0.476	possibly correct	TRUE	K	I	TRUE		File Name: S_2-1.raw (F057099)	pep:novel scaffold:cavPor3:scaffold_10:34101089:34115102:1 gene:ENSCPOG00000008488 transcript:ENSCPOT00000008565	Cavia_porcellus.cavPor3.59.pep.fasta
Spectrum21169 scans:1533,	TDFDkHK	k5: Acetyl (+42.01)	ENSCPOP00000007630	Mito-rich	Mito_GP1	0.95	32.9	25	18.6	0.367	2	466.727	931.44	932.447	2	-0.0004087	-0.4383	276	282	50765.3	1	22	30	169	0.0121	0.476	possibly correct	TRUE	K	I	TRUE		File Name: S_2-1.raw (F057099)	pep:novel scaffold:cavPor3:scaffold_10:34101089:34115102:1 gene:ENSCPOG00000008488 transcript:ENSCPOT00000008565	Cavia_porcellus.cavPor3.59.pep.fasta
Spectrum30076 scans:1449,	TDFDkHK	k5: Acetyl (+42.01)	ENSCPOP00000007630	Mito-rich	Mito_GP1	0.95	34.1	25	8.04	0	2	466.727	931.44	932.447	2	-0.0004087	-0.4383	276	282	50765.3	1	22	30	169	0.0121	0.476	possibly correct	TRUE	K	I	TRUE		File Name: S_2-1.raw (F057099)	pep:novel scaffold:cavPor3:scaffold_10:34101089:34115102:1 gene:ENSCPOG00000008488 transcript:ENSCPOT00000008565	Cavia_porcellus.cavPor3.59.pep.fasta
Spectrum10511 scans:4311,	VAkPVVEmDGDEmTR	k3: Acetyl (+42.01), m8: Oxidation (+15.99), m13: Oxidation (+15.99)	ENSCPOP00000007630	Mito-rich	Mito_GP1	0.95	0	0	0	2.92	2	876.405	1750.8	1750.8	2	1.004	0.9663	46	60	50765.3	1	22	30	169	0.0121	0.476	possibly correct	TRUE	K	I	TRUE		File Name: S_2-1.raw (F057099)	pep:novel scaffold:cavPor3:scaffold_10:34101089:34115102:1 gene:ENSCPOG00000008488 transcript:ENSCPOT00000008565	Cavia_porcellus.cavPor3.59.pep.fasta
Spectrum10425 scans:4214,	VAkPVVEmDGDEmTR	k3: Acetyl (+42.01), m8: Oxidation (+15.99), m13: Oxidation (+15.99)	ENSCPOP00000007630	Mito-rich	Mito_GP1	0.95	33.2	25	33.2	1.77	2	584.271	1749.79	1750.8	3	0.0001453	0.08301	46	60	50765.3	1	22	30	169	0.0121	0.476	possibly correct	TRUE	K	I	TRUE		File Name: S_2-1.raw (F057099)	pep:novel scaffold:cavPor3:scaffold_10:34101089:34115102:1 gene:ENSCPOG00000008488 transcript:ENSCPOT00000008565	Cavia_porcellus.cavPor3.59.pep.fasta
Spectrum22292 scans:3425,	VAkPVVEmDGDEmTR	k3: Acetyl (+42.01), m8: Oxidation (+15.99), m13: Oxidation (+15.99)	ENSCPOP00000007630	Mito-rich	Mito_GP1	0.95	37.9	25	32.3	3.68	2	875.903	1749.79	1750.8	2	0.0005213	0.2978	46	60	50765.3	1	22	30	169	0.0121	0.476	possibly correct	TRUE	K	I	TRUE		File Name: S_2-1.raw (F057099)	pep:novel scaffold:cavPor3:scaffold_10:34101089:34115102:1 gene:ENSCPOG00000008488 transcript:ENSCPOT00000008565	Cavia_porcellus.cavPor3.59.pep.fasta
Spectrum22374 scans:3542,	VAkPVVEmDGDEmTR	k3: Acetyl (+42.01), m8: Oxidation (+15.99), m13: Oxidation (+15.99)	ENSCPOP00000007630	Mito-rich	Mito_GP1	0.95	40	25	33.9	5.32	2	875.903	1749.79	1750.8	2	-0.0006987	-0.3991	46	60	50765.3	1	22	30	169	0.0121	0.476	possibly correct	TRUE	K	I	TRUE		File Name: S_2-1.raw (F057099)	pep:novel scaffold:cavPor3:scaffold_10:34101089:34115102:1 gene:ENSCPOG00000008488 transcript:ENSCPOT00000008565	Cavia_porcellus.cavPor3.59.pep.fasta
Spectrum949 scans:3165,	VAkPVVEmDGDEmTR	k3: Acetyl (+42.01), m8: Oxidation (+15.99), m13: Oxidation (+15.99)	ENSCPOP00000007630	Mito-rich	Mito_GP1	0.95	43	25	37.1	4.96	2	875.903	1749.79	1750.8	2	0.0001613	0.09215	46	60	50765.3	1	22	30	169	0.0121	0.476	possibly correct	TRUE	K	I	TRUE		File Name: S_2-1.raw (F057099)	pep:novel scaffold:cavPor3:scaffold_10:34101089:34115102:1 gene:ENSCPOG00000008488 transcript:ENSCPOT00000008565	Cavia_porcellus.cavPor3.59.pep.fasta
Spectrum22287 scans:3418,	VAkPVVEmDGDEmTR	k3: Acetyl (+42.01), m8: Oxidation (+15.99), m13: Oxidation (+15.99)	ENSCPOP00000007630	Mito-rich	Mito_GP1	0.95	45.5	25	43.1	2.89	2	875.903	1749.79	1750.8	2	0.0007613	0.4348	46	60	50765.3	1	22	30	169	0.0121	0.476	possibly correct	TRUE	K	I	TRUE		File Name: S_2-1.raw (F057099)	pep:novel scaffold:cavPor3:scaffold_10:34101089:34115102:1 gene:ENSCPOG00000008488 transcript:ENSCPOT00000008565	Cavia_porcellus.cavPor3.59.pep.fasta
Spectrum31219 scans:3452,	VAkPVVEmDGDEmTR	k3: Acetyl (+42.01), m8: Oxidation (+15.99), m13: Oxidation (+15.99)	ENSCPOP00000007630	Mito-rich	Mito_GP1	0.95	48.7	25	45.3	6.74	2	875.903	1749.79	1750.8	2	-0.0004587	-0.262	46	60	50765.3	1	22	30	169	0.0121	0.476	possibly correct	TRUE	K	I	TRUE		File Name: S_2-1.raw (F057099)	pep:novel scaffold:cavPor3:scaffold_10:34101089:34115102:1 gene:ENSCPOG00000008488 transcript:ENSCPOT00000008565	Cavia_porcellus.cavPor3.59.pep.fasta
Spectrum31159 scans:3362,	VAkPVVEmDGDEmTR	k3: Acetyl (+42.01), m8: Oxidation (+15.99), m13: Oxidation (+15.99)	ENSCPOP00000007630	Mito-rich	Mito_GP1	0.95	49.1	25	46.5	4.96	2	875.902	1749.79	1750.8	2	-0.002539	-1.45	46	60	50765.3	1	22	30	169	0.0121	0.476	possibly correct	TRUE	K	I	TRUE		File Name: S_2-1.raw (F057099)	pep:novel scaffold:cavPor3:scaffold_10:34101089:34115102:1 gene:ENSCPOG00000008488 transcript:ENSCPOT00000008565	Cavia_porcellus.cavPor3.59.pep.fasta
Spectrum31231 scans:3468,	VAkPVVEmDGDEmTR	k3: Acetyl (+42.01), m8: Oxidation (+15.99), m13: Oxidation (+15.99)	ENSCPOP00000007630	Mito-rich	Mito_GP1	0.95	49.7	25	49.7	6.05	2	875.903	1749.79	1750.8	2	-0.0004587	-0.262	46	60	50765.3	1	22	30	169	0.0121	0.476	possibly correct	TRUE	K	I	TRUE		File Name: S_2-1.raw (F057099)	pep:novel scaffold:cavPor3:scaffold_10:34101089:34115102:1 gene:ENSCPOG00000008488 transcript:ENSCPOT00000008565	Cavia_porcellus.cavPor3.59.pep.fasta
Spectrum31155 scans:3357,	VAkPVVEmDGDEmTR	k3: Acetyl (+42.01), m8: Oxidation (+15.99), m13: Oxidation (+15.99)	ENSCPOP00000007630	Mito-rich	Mito_GP1	0.95	51.3	25	45.4	5.74	2	875.903	1749.79	1750.8	2	0.0001613	0.09215	46	60	50765.3	1	22	30	169	0.0121	0.476	possibly correct	TRUE	K	I	TRUE		File Name: S_2-1.raw (F057099)	pep:novel scaffold:cavPor3:scaffold_10:34101089:34115102:1 gene:ENSCPOG00000008488 transcript:ENSCPOT00000008565	Cavia_porcellus.cavPor3.59.pep.fasta
Spectrum22354 scans:3516,	VAkPVVEmDGDEmTR	k3: Acetyl (+42.01), m8: Oxidation (+15.99), m13: Oxidation (+15.99)	ENSCPOP00000007630	Mito-rich	Mito_GP1	0.95	65.2	25	52.5	6.92	2	875.903	1749.79	1750.8	2	0.0002813	0.1607	46	60	50765.3	1	22	30	169	0.0121	0.476	possibly correct	TRUE	K	I	TRUE		File Name: S_2-1.raw (F057099)	pep:novel scaffold:cavPor3:scaffold_10:34101089:34115102:1 gene:ENSCPOG00000008488 transcript:ENSCPOT00000008565	Cavia_porcellus.cavPor3.59.pep.fasta
Spectrum10344 scans:4122,	VAkPVVEmDGDEmTR	k3: Acetyl (+42.01), m8: Oxidation (+15.99), m13: Oxidation (+15.99)	ENSCPOP00000007630	Mito-rich	Mito_GP1	0.95	66.7	25	61	3.22	2	875.903	1749.79	1750.8	2	-0.001179	-0.6732	46	60	50765.3	1	22	30	169	0.0121	0.476	possibly correct	TRUE	K	I	TRUE		File Name: S_2-1.raw (F057099)	pep:novel scaffold:cavPor3:scaffold_10:34101089:34115102:1 gene:ENSCPOG00000008488 transcript:ENSCPOT00000008565	Cavia_porcellus.cavPor3.59.pep.fasta
Spectrum10461 scans:4255,	VAkPVVEmDGDEmTR	k3: Acetyl (+42.01), m8: Oxidation (+15.99), m13: Oxidation (+15.99)	ENSCPOP00000007630	Mito-rich	Mito_GP1	0.95	66.9	25	59.4	7.74	2	875.903	1749.79	1750.8	2	0.0002813	0.1607	46	60	50765.3	1	22	30	169	0.0121	0.476	possibly correct	TRUE	K	I	TRUE		File Name: S_2-1.raw (F057099)	pep:novel scaffold:cavPor3:scaffold_10:34101089:34115102:1 gene:ENSCPOG00000008488 transcript:ENSCPOT00000008565	Cavia_porcellus.cavPor3.59.pep.fasta
Spectrum1002 scans:3250,	VAkPVVEmDGDEmTR	k3: Acetyl (+42.01), m8: Oxidation (+15.99), m13: Oxidation (+15.99)	ENSCPOP00000007630	Mito-rich	Mito_GP1	0.95	80	25	73.8	7.8	2	875.903	1749.79	1750.8	2	0.0004013	0.2292	46	60	50765.3	1	22	30	169	0.0121	0.476	possibly correct	TRUE	K	I	TRUE		File Name: S_2-1.raw (F057099)	pep:novel scaffold:cavPor3:scaffold_10:34101089:34115102:1 gene:ENSCPOG00000008488 transcript:ENSCPOT00000008565	Cavia_porcellus.cavPor3.59.pep.fasta
Spectrum35559 scans:8488,	VcVETVESGAmTkDLAGcIHGLSNVK	c2: Carbamidomethyl (+57.02), m11: Oxidation (+15.99), k13: Acetyl (+42.01), c18: Carbamidomethyl (+57.02)	ENSCPOP00000007630	Mito-rich	Mito_GP1	0.95	30.8	27.6	5.01	-0.301	2	945.124	2832.35	2833.35	3	0.00309	1.09	401	426	50765.3	1	22	30	169	0.0121	0.476	possibly correct	TRUE	K	L	TRUE		File Name: S_2-1.raw (F057099)	pep:novel scaffold:cavPor3:scaffold_10:34101089:34115102:1 gene:ENSCPOG00000008488 transcript:ENSCPOT00000008565	Cavia_porcellus.cavPor3.59.pep.fasta
Spectrum15597 scans:9741,	VcVETVESGAmTkDLAGcIHGLSNVK	c2: Carbamidomethyl (+57.02), m11: Oxidation (+15.99), k13: Acetyl (+42.01), c18: Carbamidomethyl (+57.02)	ENSCPOP00000007630	Mito-rich	Mito_GP1	0.95	32.4	27.5	24.6	0.0809	2	709.094	2832.35	2833.35	4	0.001214	0.4284	401	426	50765.3	1	22	30	169	0.0121	0.476	possibly correct	TRUE	K	L	TRUE		File Name: S_2-1.raw (F057099)	pep:novel scaffold:cavPor3:scaffold_10:34101089:34115102:1 gene:ENSCPOG00000008488 transcript:ENSCPOT00000008565	Cavia_porcellus.cavPor3.59.pep.fasta
Spectrum35448 scans:8366,	VcVETVESGAmTkDLAGcIHGLSNVK	c2: Carbamidomethyl (+57.02), m11: Oxidation (+15.99), k13: Acetyl (+42.01), c18: Carbamidomethyl (+57.02)	ENSCPOP00000007630	Mito-rich	Mito_GP1	0.95	32.8	27.4	17.7	0.886	2	709.093	2832.34	2833.35	4	-0.001706	-0.6022	401	426	50765.3	1	22	30	169	0.0121	0.476	possibly correct	TRUE	K	L	TRUE		File Name: S_2-1.raw (F057099)	pep:novel scaffold:cavPor3:scaffold_10:34101089:34115102:1 gene:ENSCPOG00000008488 transcript:ENSCPOT00000008565	Cavia_porcellus.cavPor3.59.pep.fasta
Spectrum36821 scans:9828,	VcVETVESGAMTkDLAGcIHGLSNVK	c2: Carbamidomethyl (+57.02), k13: Acetyl (+42.01), c18: Carbamidomethyl (+57.02)	ENSCPOP00000007630	Mito-rich	Mito_GP1	0.95	37.2	28.2	15.1	0	2	939.791	2816.35	2817.36	3	0.0006247	0.2217	401	426	50765.3	1	22	30	169	0.0121	0.476	possibly correct	TRUE	K	L	TRUE		File Name: S_2-1.raw (F057099)	pep:novel scaffold:cavPor3:scaffold_10:34101089:34115102:1 gene:ENSCPOG00000008488 transcript:ENSCPOT00000008565	Cavia_porcellus.cavPor3.59.pep.fasta
Spectrum26642 scans:8462,	VcVETVESGAmTkDLAGcIHGLSNVK	c2: Carbamidomethyl (+57.02), m11: Oxidation (+15.99), k13: Acetyl (+42.01), c18: Carbamidomethyl (+57.02)	ENSCPOP00000007630	Mito-rich	Mito_GP1	0.95	38.8	27.5	25.1	1.24	2	709.094	2832.35	2833.35	4	0.001494	0.5272	401	426	50765.3	1	22	30	169	0.0121	0.476	possibly correct	TRUE	K	L	TRUE		File Name: S_2-1.raw (F057099)	pep:novel scaffold:cavPor3:scaffold_10:34101089:34115102:1 gene:ENSCPOG00000008488 transcript:ENSCPOT00000008565	Cavia_porcellus.cavPor3.59.pep.fasta
Spectrum5158 scans:7982,	VcVETVESGAmTkDLAGcIHGLSNVK	c2: Carbamidomethyl (+57.02), m11: Oxidation (+15.99), k13: Acetyl (+42.01), c18: Carbamidomethyl (+57.02)	ENSCPOP00000007630	Mito-rich	Mito_GP1	0.95	42	27.6	28.1	1.31	2	945.123	2832.35	2833.35	3	0.00216	0.7623	401	426	50765.3	1	22	30	169	0.0121	0.476	possibly correct	TRUE	K	L	TRUE		File Name: S_2-1.raw (F057099)	pep:novel scaffold:cavPor3:scaffold_10:34101089:34115102:1 gene:ENSCPOG00000008488 transcript:ENSCPOT00000008565	Cavia_porcellus.cavPor3.59.pep.fasta
Spectrum5060 scans:7875,	VcVETVESGAmTkDLAGcIHGLSNVK	c2: Carbamidomethyl (+57.02), m11: Oxidation (+15.99), k13: Acetyl (+42.01), c18: Carbamidomethyl (+57.02)	ENSCPOP00000007630	Mito-rich	Mito_GP1	0.95	49.8	27.4	25.2	0.638	2	709.094	2832.35	2833.35	4	0.0004937	0.1743	401	426	50765.3	1	22	30	169	0.0121	0.476	possibly correct	TRUE	K	L	TRUE		File Name: S_2-1.raw (F057099)	pep:novel scaffold:cavPor3:scaffold_10:34101089:34115102:1 gene:ENSCPOG00000008488 transcript:ENSCPOT00000008565	Cavia_porcellus.cavPor3.59.pep.fasta
Spectrum26757 scans:8587,	VcVETVESGAmTkDLAGcIHGLSNVK	c2: Carbamidomethyl (+57.02), m11: Oxidation (+15.99), k13: Acetyl (+42.01), c18: Carbamidomethyl (+57.02)	ENSCPOP00000007630	Mito-rich	Mito_GP1	0.95	50.5	27.5	30.9	1.01	2	945.123	2832.35	2833.35	3	0.00144	0.5081	401	426	50765.3	1	22	30	169	0.0121	0.476	possibly correct	TRUE	K	L	TRUE		File Name: S_2-1.raw (F057099)	pep:novel scaffold:cavPor3:scaffold_10:34101089:34115102:1 gene:ENSCPOG00000008488 transcript:ENSCPOT00000008565	Cavia_porcellus.cavPor3.59.pep.fasta
Spectrum26650 scans:8471,	VcVETVESGAmTkDLAGcIHGLSNVK	c2: Carbamidomethyl (+57.02), m11: Oxidation (+15.99), k13: Acetyl (+42.01), c18: Carbamidomethyl (+57.02)	ENSCPOP00000007630	Mito-rich	Mito_GP1	0.95	50.7	27.5	34	1.19	2	709.094	2832.35	2833.35	4	0.001494	0.5272	401	426	50765.3	1	22	30	169	0.0121	0.476	possibly correct	TRUE	K	L	TRUE		File Name: S_2-1.raw (F057099)	pep:novel scaffold:cavPor3:scaffold_10:34101089:34115102:1 gene:ENSCPOG00000008488 transcript:ENSCPOT00000008565	Cavia_porcellus.cavPor3.59.pep.fasta
Spectrum35427 scans:8343,	VcVETVESGAmTkDLAGcIHGLSNVK	c2: Carbamidomethyl (+57.02), m11: Oxidation (+15.99), k13: Acetyl (+42.01), c18: Carbamidomethyl (+57.02)	ENSCPOP00000007630	Mito-rich	Mito_GP1	0.95	51.8	27.6	28.5	3	2	945.123	2832.35	2833.35	3	0.00198	0.6987	401	426	50765.3	1	22	30	169	0.0121	0.476	possibly correct	TRUE	K	L	TRUE		File Name: S_2-1.raw (F057099)	pep:novel scaffold:cavPor3:scaffold_10:34101089:34115102:1 gene:ENSCPOG00000008488 transcript:ENSCPOT00000008565	Cavia_porcellus.cavPor3.59.pep.fasta
Spectrum26622 scans:8440,	VcVETVESGAmTkDLAGcIHGLSNVK	c2: Carbamidomethyl (+57.02), m11: Oxidation (+15.99), k13: Acetyl (+42.01), c18: Carbamidomethyl (+57.02)	ENSCPOP00000007630	Mito-rich	Mito_GP1	0.95	57.5	27.4	36.2	2.11	2	945.122	2832.34	2833.35	3	-0.0015	-0.5295	401	426	50765.3	1	22	30	169	0.0121	0.476	possibly correct	TRUE	K	L	TRUE		File Name: S_2-1.raw (F057099)	pep:novel scaffold:cavPor3:scaffold_10:34101089:34115102:1 gene:ENSCPOG00000008488 transcript:ENSCPOT00000008565	Cavia_porcellus.cavPor3.59.pep.fasta
Spectrum6305 scans:9195,	VcVETVESGAMTkDLAGcIHGLSNVK	c2: Carbamidomethyl (+57.02), k13: Acetyl (+42.01), c18: Carbamidomethyl (+57.02)	ENSCPOP00000007630	Mito-rich	Mito_GP1	0.95	58.8	28.3	32.2	0.886	2	939.791	2816.35	2817.36	3	0.001345	0.4773	401	426	50765.3	1	22	30	169	0.0121	0.476	possibly correct	TRUE	K	L	TRUE		File Name: S_2-1.raw (F057099)	pep:novel scaffold:cavPor3:scaffold_10:34101089:34115102:1 gene:ENSCPOG00000008488 transcript:ENSCPOT00000008565	Cavia_porcellus.cavPor3.59.pep.fasta
Spectrum26637 scans:8457,	VcVETVESGAmTkDLAGcIHGLSNVK	c2: Carbamidomethyl (+57.02), m11: Oxidation (+15.99), k13: Acetyl (+42.01), c18: Carbamidomethyl (+57.02)	ENSCPOP00000007630	Mito-rich	Mito_GP1	0.95	58.5	27.5	46	3.38	2	945.123	2832.35	2833.35	3	0.00126	0.4446	401	426	50765.3	1	22	30	169	0.0121	0.476	possibly correct	TRUE	K	L	TRUE		File Name: S_2-1.raw (F057099)	pep:novel scaffold:cavPor3:scaffold_10:34101089:34115102:1 gene:ENSCPOG00000008488 transcript:ENSCPOT00000008565	Cavia_porcellus.cavPor3.59.pep.fasta
Spectrum5040 scans:7853,	VcVETVESGAmTkDLAGcIHGLSNVK	c2: Carbamidomethyl (+57.02), m11: Oxidation (+15.99), k13: Acetyl (+42.01), c18: Carbamidomethyl (+57.02)	ENSCPOP00000007630	Mito-rich	Mito_GP1	0.95	62.5	27.4	41.7	2.92	2	945.122	2832.34	2833.35	3	-0.00186	-0.6566	401	426	50765.3	1	22	30	169	0.0121	0.476	possibly correct	TRUE	K	L	TRUE		File Name: S_2-1.raw (F057099)	pep:novel scaffold:cavPor3:scaffold_10:34101089:34115102:1 gene:ENSCPOG00000008488 transcript:ENSCPOT00000008565	Cavia_porcellus.cavPor3.59.pep.fasta
Spectrum5049 scans:7863,	VcVETVESGAmTkDLAGcIHGLSNVK	c2: Carbamidomethyl (+57.02), m11: Oxidation (+15.99), k13: Acetyl (+42.01), c18: Carbamidomethyl (+57.02)	ENSCPOP00000007630	Mito-rich	Mito_GP1	0.95	66.1	27.6	37.5	1.59	2	709.094	2832.35	2833.35	4	0.002214	0.7813	401	426	50765.3	1	22	30	169	0.0121	0.476	possibly correct	TRUE	K	L	TRUE		File Name: S_2-1.raw (F057099)	pep:novel scaffold:cavPor3:scaffold_10:34101089:34115102:1 gene:ENSCPOG00000008488 transcript:ENSCPOT00000008565	Cavia_porcellus.cavPor3.59.pep.fasta
Spectrum15579 scans:9722,	VcVETVESGAmTkDLAGcIHGLSNVK	c2: Carbamidomethyl (+57.02), m11: Oxidation (+15.99), k13: Acetyl (+42.01), c18: Carbamidomethyl (+57.02)	ENSCPOP00000007630	Mito-rich	Mito_GP1	0.95	68.3	27.4	46.8	2.68	2	945.123	2832.35	2833.35	3	0.0006897	0.2434	401	426	50765.3	1	22	30	169	0.0121	0.476	possibly correct	TRUE	K	L	TRUE		File Name: S_2-1.raw (F057099)	pep:novel scaffold:cavPor3:scaffold_10:34101089:34115102:1 gene:ENSCPOG00000008488 transcript:ENSCPOT00000008565	Cavia_porcellus.cavPor3.59.pep.fasta
Spectrum35537 scans:8465,	VcVETVESGAmTkDLAGcIHGLSNVK	c2: Carbamidomethyl (+57.02), m11: Oxidation (+15.99), k13: Acetyl (+42.01), c18: Carbamidomethyl (+57.02)	ENSCPOP00000007630	Mito-rich	Mito_GP1	0.95	77	27.5	53.9	2.28	2	945.123	2832.35	2833.35	3	0.00162	0.5717	401	426	50765.3	1	22	30	169	0.0121	0.476	possibly correct	TRUE	K	L	TRUE		File Name: S_2-1.raw (F057099)	pep:novel scaffold:cavPor3:scaffold_10:34101089:34115102:1 gene:ENSCPOG00000008488 transcript:ENSCPOT00000008565	Cavia_porcellus.cavPor3.59.pep.fasta
Spectrum28034 scans:9942,	VcVETVESGAMTkDLAGcIHGLSNVK	c2: Carbamidomethyl (+57.02), k13: Acetyl (+42.01), c18: Carbamidomethyl (+57.02)	ENSCPOP00000007630	Mito-rich	Mito_GP1	0.95	85.2	28.2	56.2	3.11	2	939.791	2816.35	2817.36	3	0.0008047	0.2856	401	426	50765.3	1	22	30	169	0.0121	0.476	possibly correct	TRUE	K	L	TRUE		File Name: S_2-1.raw (F057099)	pep:novel scaffold:cavPor3:scaffold_10:34101089:34115102:1 gene:ENSCPOG00000008488 transcript:ENSCPOT00000008565	Cavia_porcellus.cavPor3.59.pep.fasta
Spectrum10104 scans:3842,	mIDGkPEYK	m1: Oxidation (+15.99), k5: Acetyl (+42.01)	ENSCPOP00000004508	Mito-rich	Mito_GP1	0.95	33.8	25	15.7	1.36	2	569.776	1137.54	1138.55	2	-0.0002837	-0.2491	252	260	34002	1	1	1	2	0.000144	0.0287	possibly correct	TRUE	R	N	TRUE		File Name: S_2-1.raw (F057099)	pep:novel scaffold:cavPor3:scaffold_61:10015177:10017367:-1 gene:ENSCPOG00000005008 transcript:ENSCPOT00000005062	Cavia_porcellus.cavPor3.59.pep.fasta
Spectrum848 scans:3001,	mIDGkPEYK	m1: Oxidation (+15.99), k5: Acetyl (+42.01)	ENSCPOP00000004508	Mito-rich	Mito_GP1	0.95	35.7	25	21.5	1.96	2	569.777	1137.54	1138.55	2	0.0006963	0.6116	252	260	34002	1	1	1	2	0.000144	0.0287	possibly correct	TRUE	R	N	TRUE		File Name: S_2-1.raw (F057099)	pep:novel scaffold:cavPor3:scaffold_61:10015177:10017367:-1 gene:ENSCPOG00000005008 transcript:ENSCPOT00000005062	Cavia_porcellus.cavPor3.59.pep.fasta
Spectrum22087 scans:3143,	AIcEEkIR	c3: Carbamidomethyl (+57.02), k6: Acetyl (+42.01)	ENSCPOP00000011654	Mito-rich	Mito_GP1	0.95	30.4	26.4	12.6	0.553	2	530.776	1059.54	1060.55	2	-0.000714	-0.6732	320	327	64766.9	1	2	2	5	0.000359	0.0392	possibly correct	TRUE	R	L	TRUE		File Name: S_2-1.raw (F057099)	pep:novel scaffold:cavPor3:scaffold_232:23528:45611:1 gene:ENSCPOG00000012945 transcript:ENSCPOT00000013070	Cavia_porcellus.cavPor3.59.pep.fasta
Spectrum4315 scans:7074,	LPGSVGTPLPkVEVR	k11: Acetyl (+42.01)	ENSCPOP00000011654	Mito-rich	Mito_GP1	0.95	29.3	25	29.3	-0.146	2	795.963	1589.91	1590.92	2	-0.001889	-1.187	374	388	64766.9	1	2	2	5	0.000359	0.0392	possibly correct	TRUE	R	I	TRUE		File Name: S_2-1.raw (F057099)	pep:novel scaffold:cavPor3:scaffold_232:23528:45611:1 gene:ENSCPOG00000012945 transcript:ENSCPOT00000013070	Cavia_porcellus.cavPor3.59.pep.fasta
Spectrum25829 scans:7574,	LPGSVGTPLPkVEVR	k11: Acetyl (+42.01)	ENSCPOP00000011654	Mito-rich	Mito_GP1	0.95	35.1	25	35.1	0.569	2	795.963	1589.91	1590.92	2	-0.002629	-1.652	374	388	64766.9	1	2	2	5	0.000359	0.0392	possibly correct	TRUE	R	I	TRUE		File Name: S_2-1.raw (F057099)	pep:novel scaffold:cavPor3:scaffold_232:23528:45611:1 gene:ENSCPOG00000012945 transcript:ENSCPOT00000013070	Cavia_porcellus.cavPor3.59.pep.fasta
Spectrum34617 scans:7446,	LPGSVGTPLPkVEVR	k11: Acetyl (+42.01)	ENSCPOP00000011654	Mito-rich	Mito_GP1	0.95	38.2	25	38.2	0.229	2	795.965	1589.92	1590.92	2	0.001051	0.6608	374	388	64766.9	1	2	2	5	0.000359	0.0392	possibly correct	TRUE	R	I	TRUE		File Name: S_2-1.raw (F057099)	pep:novel scaffold:cavPor3:scaffold_232:23528:45611:1 gene:ENSCPOG00000012945 transcript:ENSCPOT00000013070	Cavia_porcellus.cavPor3.59.pep.fasta
Spectrum14829 scans:8930,	LPGSVGTPLPkVEVR	k11: Acetyl (+42.01)	ENSCPOP00000011654	Mito-rich	Mito_GP1	0.95	41.8	25	41.8	2.96	2	795.964	1589.91	1590.92	2	-0.0003087	-0.194	374	388	64766.9	1	2	2	5	0.000359	0.0392	possibly correct	TRUE	R	I	TRUE		File Name: S_2-1.raw (F057099)	pep:novel scaffold:cavPor3:scaffold_232:23528:45611:1 gene:ENSCPOG00000012945 transcript:ENSCPOT00000013070	Cavia_porcellus.cavPor3.59.pep.fasta
Spectrum12166 scans:6113,	mYDkGLVYR	m1: Oxidation (+15.99), k4: Acetyl (+42.01)	ENSCPOP00000011651	Mito-rich	Mito_GP1	0.95	32.5	25	29	-0.279	2	601.797	1201.58	1202.59	2	3.634e-05	0.03022	230	238	111240	1	3	4	18	0.00129	0.0337	possibly correct	TRUE	K	S	TRUE		File Name: S_2-1.raw (F057099)	pep:novel scaffold:cavPor3:scaffold_13:2504462:2538385:-1 gene:ENSCPOG00000012942 transcript:ENSCPOT00000013067	Cavia_porcellus.cavPor3.59.pep.fasta
Spectrum2198 scans:4755,	mYDkGLVYR	m1: Oxidation (+15.99), k4: Acetyl (+42.01)	ENSCPOP00000011651	Mito-rich	Mito_GP1	0.95	42.4	25	36.8	1.1	2	601.797	1201.58	1202.59	2	-0.0003237	-0.2691	230	238	111240	1	3	4	18	0.00129	0.0337	possibly correct	TRUE	K	S	TRUE		File Name: S_2-1.raw (F057099)	pep:novel scaffold:cavPor3:scaffold_13:2504462:2538385:-1 gene:ENSCPOG00000012942 transcript:ENSCPOT00000013067	Cavia_porcellus.cavPor3.59.pep.fasta
Spectrum12173 scans:6121,	mYDkGLVYR	m1: Oxidation (+15.99), k4: Acetyl (+42.01)	ENSCPOP00000011651	Mito-rich	Mito_GP1	0.95	50.4	25	40.2	3.57	2	601.797	1201.58	1202.59	2	-0.0004437	-0.3689	230	238	111240	1	3	4	18	0.00129	0.0337	possibly correct	TRUE	K	S	TRUE		File Name: S_2-1.raw (F057099)	pep:novel scaffold:cavPor3:scaffold_13:2504462:2538385:-1 gene:ENSCPOG00000012942 transcript:ENSCPOT00000013067	Cavia_porcellus.cavPor3.59.pep.fasta
Spectrum35514 scans:8439,	SYkPVFWSPSSR	k3: Acetyl (+42.01)	ENSCPOP00000011651	Mito-rich	Mito_GP1	0.95	22.4	26.4	21.5	1.11	2	741.873	1481.73	1482.74	2	0.001051	0.7091	239	250	111240	1	3	4	18	0.00129	0.0337	possibly correct	TRUE	R	T	TRUE		File Name: S_2-1.raw (F057099)	pep:novel scaffold:cavPor3:scaffold_13:2504462:2538385:-1 gene:ENSCPOG00000012942 transcript:ENSCPOT00000013067	Cavia_porcellus.cavPor3.59.pep.fasta
Spectrum5092 scans:7909,	SYkPVFWSPSSR	k3: Acetyl (+42.01)	ENSCPOP00000011651	Mito-rich	Mito_GP1	0.95	22.9	26.5	18.2	1.07	2	741.872	1481.73	1482.74	2	-0.0004087	-0.2756	239	250	111240	1	3	4	18	0.00129	0.0337	possibly correct	TRUE	R	T	TRUE		File Name: S_2-1.raw (F057099)	pep:novel scaffold:cavPor3:scaffold_13:2504462:2538385:-1 gene:ENSCPOG00000012942 transcript:ENSCPOT00000013067	Cavia_porcellus.cavPor3.59.pep.fasta
Spectrum35450 scans:8368,	SYkPVFWSPSSR	k3: Acetyl (+42.01)	ENSCPOP00000011651	Mito-rich	Mito_GP1	0.95	24.6	26.4	18.3	1.44	2	741.873	1481.73	1482.74	2	0.001551	1.046	239	250	111240	1	3	4	18	0.00129	0.0337	possibly correct	TRUE	R	T	TRUE		File Name: S_2-1.raw (F057099)	pep:novel scaffold:cavPor3:scaffold_13:2504462:2538385:-1 gene:ENSCPOG00000012942 transcript:ENSCPOT00000013067	Cavia_porcellus.cavPor3.59.pep.fasta
Spectrum35490 scans:8413,	SYkPVFWSPSSR	k3: Acetyl (+42.01)	ENSCPOP00000011651	Mito-rich	Mito_GP1	0.95	30.6	26.4	24.3	0.357	2	741.873	1481.73	1482.74	2	0.001671	1.127	239	250	111240	1	3	4	18	0.00129	0.0337	possibly correct	TRUE	R	T	TRUE		File Name: S_2-1.raw (F057099)	pep:novel scaffold:cavPor3:scaffold_13:2504462:2538385:-1 gene:ENSCPOG00000012942 transcript:ENSCPOT00000013067	Cavia_porcellus.cavPor3.59.pep.fasta
Spectrum22666 scans:3935,	VLVTPATQEkcPR	k10: Acetyl (+42.01), c11: Carbamidomethyl (+57.02)	ENSCPOP00000011651	Mito-rich	Mito_GP1	0.944	22.4	26.8	20.9	0.161	2	514.277	1539.81	1540.82	3	0.00173	1.123	974	986	111240	1	3	4	18	0.00129	0.0337	possibly correct	TRUE	K	C	TRUE		File Name: S_2-1.raw (F057099)	pep:novel scaffold:cavPor3:scaffold_13:2504462:2538385:-1 gene:ENSCPOG00000012942 transcript:ENSCPOT00000013067	Cavia_porcellus.cavPor3.59.pep.fasta
Spectrum22654 scans:3919,	VLVTPATQEkcPR	k10: Acetyl (+42.01), c11: Carbamidomethyl (+57.02)	ENSCPOP00000011651	Mito-rich	Mito_GP1	0.95	25.8	26.9	21.2	0.481	2	514.276	1539.81	1540.82	3	-0.00139	-0.9021	974	986	111240	1	3	4	18	0.00129	0.0337	possibly correct	TRUE	K	C	TRUE		File Name: S_2-1.raw (F057099)	pep:novel scaffold:cavPor3:scaffold_13:2504462:2538385:-1 gene:ENSCPOG00000012942 transcript:ENSCPOT00000013067	Cavia_porcellus.cavPor3.59.pep.fasta
Spectrum22593 scans:3839,	VLVTPATQEkcPR	k10: Acetyl (+42.01), c11: Carbamidomethyl (+57.02)	ENSCPOP00000011651	Mito-rich	Mito_GP1	0.95	26.7	27.2	21.2	2.43	2	770.911	1539.81	1540.82	2	-0.000154	-0.09992	974	986	111240	1	3	4	18	0.00129	0.0337	possibly correct	TRUE	K	C	TRUE		File Name: S_2-1.raw (F057099)	pep:novel scaffold:cavPor3:scaffold_13:2504462:2538385:-1 gene:ENSCPOG00000012942 transcript:ENSCPOT00000013067	Cavia_porcellus.cavPor3.59.pep.fasta
Spectrum31431 scans:3753,	VLVTPATQEkcPR	k10: Acetyl (+42.01), c11: Carbamidomethyl (+57.02)	ENSCPOP00000011651	Mito-rich	Mito_GP1	0.95	0	0	0	3.7	2	771.414	1540.81	1540.82	2	1.005	1.308	974	986	111240	1	3	4	18	0.00129	0.0337	possibly correct	TRUE	K	C	TRUE		File Name: S_2-1.raw (F057099)	pep:novel scaffold:cavPor3:scaffold_13:2504462:2538385:-1 gene:ENSCPOG00000012942 transcript:ENSCPOT00000013067	Cavia_porcellus.cavPor3.59.pep.fasta
Spectrum22699 scans:3980,	VLVTPATQEkcPR	k10: Acetyl (+42.01), c11: Carbamidomethyl (+57.02)	ENSCPOP00000011651	Mito-rich	Mito_GP1	0.95	54.2	27.2	44.1	4.05	2	770.91	1539.8	1540.82	2	-0.003434	-2.229	974	986	111240	1	3	4	18	0.00129	0.0337	possibly correct	TRUE	K	C	TRUE		File Name: S_2-1.raw (F057099)	pep:novel scaffold:cavPor3:scaffold_13:2504462:2538385:-1 gene:ENSCPOG00000012942 transcript:ENSCPOT00000013067	Cavia_porcellus.cavPor3.59.pep.fasta
Spectrum31437 scans:3760,	VLVTPATQEkcPR	k10: Acetyl (+42.01), c11: Carbamidomethyl (+57.02)	ENSCPOP00000011651	Mito-rich	Mito_GP1	0.95	54.1	26.9	48.5	4.34	2	770.911	1539.81	1540.82	2	-0.000754	-0.4893	974	986	111240	1	3	4	18	0.00129	0.0337	possibly correct	TRUE	K	C	TRUE		File Name: S_2-1.raw (F057099)	pep:novel scaffold:cavPor3:scaffold_13:2504462:2538385:-1 gene:ENSCPOG00000012942 transcript:ENSCPOT00000013067	Cavia_porcellus.cavPor3.59.pep.fasta
Spectrum1276 scans:3644,	VLVTPATQEkcPR	k10: Acetyl (+42.01), c11: Carbamidomethyl (+57.02)	ENSCPOP00000011651	Mito-rich	Mito_GP1	0.95	55.5	27.2	47.4	4.28	2	770.911	1539.81	1540.82	2	-0.000154	-0.09992	974	986	111240	1	3	4	18	0.00129	0.0337	possibly correct	TRUE	K	C	TRUE		File Name: S_2-1.raw (F057099)	pep:novel scaffold:cavPor3:scaffold_13:2504462:2538385:-1 gene:ENSCPOG00000012942 transcript:ENSCPOT00000013067	Cavia_porcellus.cavPor3.59.pep.fasta
Spectrum10987 scans:4847,	VLVTPATQEkcPR	k10: Acetyl (+42.01), c11: Carbamidomethyl (+57.02)	ENSCPOP00000011651	Mito-rich	Mito_GP1	0.95	58.7	27.2	53.1	7.21	2	770.912	1539.81	1540.82	2	0.000346	0.2246	974	986	111240	1	3	4	18	0.00129	0.0337	possibly correct	TRUE	K	C	TRUE		File Name: S_2-1.raw (F057099)	pep:novel scaffold:cavPor3:scaffold_13:2504462:2538385:-1 gene:ENSCPOG00000012942 transcript:ENSCPOT00000013067	Cavia_porcellus.cavPor3.59.pep.fasta
Spectrum31495 scans:3845,	VLVTPATQEkcPR	k10: Acetyl (+42.01), c11: Carbamidomethyl (+57.02)	ENSCPOP00000011651	Mito-rich	Mito_GP1	0.95	69.1	27.2	61.4	6.48	2	770.912	1539.81	1540.82	2	0.000346	0.2246	974	986	111240	1	3	4	18	0.00129	0.0337	possibly correct	TRUE	K	C	TRUE		File Name: S_2-1.raw (F057099)	pep:novel scaffold:cavPor3:scaffold_13:2504462:2538385:-1 gene:ENSCPOG00000012942 transcript:ENSCPOT00000013067	Cavia_porcellus.cavPor3.59.pep.fasta
Spectrum1333 scans:3730,	VLVTPATQEkcPR	k10: Acetyl (+42.01), c11: Carbamidomethyl (+57.02)	ENSCPOP00000011651	Mito-rich	Mito_GP1	0.95	69.3	27.1	59.9	6.41	2	770.911	1539.81	1540.82	2	-1.395e-05	-0.009057	974	986	111240	1	3	4	18	0.00129	0.0337	possibly correct	TRUE	K	C	TRUE		File Name: S_2-1.raw (F057099)	pep:novel scaffold:cavPor3:scaffold_13:2504462:2538385:-1 gene:ENSCPOG00000012942 transcript:ENSCPOT00000013067	Cavia_porcellus.cavPor3.59.pep.fasta
Spectrum22674 scans:3946,	VLVTPATQEkcPR	k10: Acetyl (+42.01), c11: Carbamidomethyl (+57.02)	ENSCPOP00000011651	Mito-rich	Mito_GP1	0.95	71.9	27.1	63.9	7.17	2	770.911	1539.81	1540.82	2	0.000226	0.1467	974	986	111240	1	3	4	18	0.00129	0.0337	possibly correct	TRUE	K	C	TRUE		File Name: S_2-1.raw (F057099)	pep:novel scaffold:cavPor3:scaffold_13:2504462:2538385:-1 gene:ENSCPOG00000012942 transcript:ENSCPOT00000013067	Cavia_porcellus.cavPor3.59.pep.fasta
Spectrum14796 scans:8895,	GPLkTPIAAGHPSmNLLLR	k4: Acetyl (+42.01), m14: Oxidation (+15.99)	ENSCPOP00000001412	Mito-rich	Mito_GP1	0.95	22.1	26.8	20.6	1.38	2	682.051	2043.13	2044.14	3	-0.0002797	-0.1368	97	115	39612.6	1	1	1	1	7.19e-05	0.0519	possibly correct	TRUE	K	K	TRUE		File Name: S_2-1.raw (F057099)	pep:novel scaffold:cavPor3:scaffold_98:1875067:1888666:1 gene:ENSCPOG00000001563 transcript:ENSCPOT00000001583	Cavia_porcellus.cavPor3.59.pep.fasta
Spectrum35259 scans:8157,	LGLDPkLLAK	k6: Acetyl (+42.01)	ENSCPOP00000017738	Mito-rich	Mito_GP1	0.95	24.3	25	12.4	1.22	2	555.35	1108.69	1109.69	2	-4.865e-05	-0.04384	76	85	18795.2	1	2	2	4	0.000287	0.101	possibly correct	TRUE	R	I	TRUE		File Name: S_2-1.raw (F057099)	pep:novel scaffold:cavPor3:scaffold_44:4240293:4252180:-1 gene:ENSCPOG00000020159 transcript:ENSCPOT00000025371	Cavia_porcellus.cavPor3.59.pep.fasta
Spectrum3702 scans:6419,	LLAkILNmSSGR	k4: Acetyl (+42.01), m8: Oxidation (+15.99)	ENSCPOP00000017738	Mito-rich	Mito_GP1	0.95	57.7	26.6	49.7	2.96	2	680.885	1359.75	1360.76	2	5.634e-05	0.0414	82	93	18795.2	1	2	2	4	0.000287	0.101	possibly correct	TRUE	K	C	TRUE		File Name: S_2-1.raw (F057099)	pep:novel scaffold:cavPor3:scaffold_44:4240293:4252180:-1 gene:ENSCPOG00000020159 transcript:ENSCPOT00000025371	Cavia_porcellus.cavPor3.59.pep.fasta
Spectrum25185 scans:6872,	LLAkILNmSSGR	k4: Acetyl (+42.01), m8: Oxidation (+15.99)	ENSCPOP00000017738	Mito-rich	Mito_GP1	0.95	59.3	26.6	50.7	3.51	2	680.885	1359.75	1360.76	2	-6.366e-05	-0.04678	82	93	18795.2	1	2	2	4	0.000287	0.101	possibly correct	TRUE	K	C	TRUE		File Name: S_2-1.raw (F057099)	pep:novel scaffold:cavPor3:scaffold_44:4240293:4252180:-1 gene:ENSCPOG00000020159 transcript:ENSCPOT00000025371	Cavia_porcellus.cavPor3.59.pep.fasta
Spectrum34008 scans:6778,	LLAkILNmSSGR	k4: Acetyl (+42.01), m8: Oxidation (+15.99)	ENSCPOP00000017738	Mito-rich	Mito_GP1	0.95	62.9	26.6	55.2	3.01	2	680.885	1359.75	1360.76	2	5.634e-05	0.0414	82	93	18795.2	1	2	2	4	0.000287	0.101	possibly correct	TRUE	K	C	TRUE		File Name: S_2-1.raw (F057099)	pep:novel scaffold:cavPor3:scaffold_44:4240293:4252180:-1 gene:ENSCPOG00000020159 transcript:ENSCPOT00000025371	Cavia_porcellus.cavPor3.59.pep.fasta
Spectrum17798 scans:12102,	AFPNYFSkGIPNVLR	k8: Acetyl (+42.01)	ENSCPOP00000017707	Mito-rich	Mito_GP1	0.95	42.4	27.7	25.7	3.08	2	882.976	1763.94	1764.94	2	0.002151	1.219	26	40	9625.4	0.99	1	1	4	0.000287	0.183	possibly correct	TRUE	R	R	TRUE		File Name: S_2-1.raw (F057099)	pep:novel scaffold:cavPor3:scaffold_81:2011324:2012236:1 gene:ENSCPOG00000022324 transcript:ENSCPOT00000026976	Cavia_porcellus.cavPor3.59.pep.fasta
Spectrum28771 scans:10720,	AFPNYFSkGIPNVLR	k8: Acetyl (+42.01)	ENSCPOP00000017707	Mito-rich	Mito_GP1	0.95	58.8	27.8	46.9	3.85	2	882.976	1763.94	1764.94	2	0.001291	0.7317	26	40	9625.4	0.99	1	1	4	0.000287	0.183	possibly correct	TRUE	R	R	TRUE		File Name: S_2-1.raw (F057099)	pep:novel scaffold:cavPor3:scaffold_81:2011324:2012236:1 gene:ENSCPOG00000022324 transcript:ENSCPOT00000026976	Cavia_porcellus.cavPor3.59.pep.fasta
Spectrum37516 scans:10579,	AFPNYFSkGIPNVLR	k8: Acetyl (+42.01)	ENSCPOP00000017707	Mito-rich	Mito_GP1	0.95	71.9	27.7	67	2.68	2	882.976	1763.94	1764.94	2	0.002151	1.219	26	40	9625.4	0.99	1	1	4	0.000287	0.183	possibly correct	TRUE	R	R	TRUE		File Name: S_2-1.raw (F057099)	pep:novel scaffold:cavPor3:scaffold_81:2011324:2012236:1 gene:ENSCPOG00000022324 transcript:ENSCPOT00000026976	Cavia_porcellus.cavPor3.59.pep.fasta
Spectrum7021 scans:9950,	AFPNYFSkGIPNVLR	k8: Acetyl (+42.01)	ENSCPOP00000017707	Mito-rich	Mito_GP1	0.95	73.3	27.7	69.8	4.72	2	882.976	1763.94	1764.94	2	0.001651	0.9356	26	40	9625.4	0.99	1	1	4	0.000287	0.183	possibly correct	TRUE	R	R	TRUE		File Name: S_2-1.raw (F057099)	pep:novel scaffold:cavPor3:scaffold_81:2011324:2012236:1 gene:ENSCPOG00000022324 transcript:ENSCPOT00000026976	Cavia_porcellus.cavPor3.59.pep.fasta
Spectrum17692 scans:11986,	DVFTkGYGFGLIK	k5: Acetyl (+42.01)	ENSCPOP00000017704	Mito-rich	Mito_GP1	0.95	26.4	27.6	21.5	1.41	2	743.901	1485.79	1486.79	2	0.0008913	0.5995	16	28	30690.7	1	4	4	14	0.00101	0.159	possibly correct	TRUE	R	L	TRUE		File Name: S_2-1.raw (F057099)	pep:novel scaffold:cavPor3:scaffold_81:3026472:3041363:-1 gene:ENSCPOG00000023840 transcript:ENSCPOT00000025252	Cavia_porcellus.cavPor3.59.pep.fasta
Spectrum6935 scans:9859,	DVFTkGYGFGLIK	k5: Acetyl (+42.01)	ENSCPOP00000017704	Mito-rich	Mito_GP1	0.95	68	27.7	60	3.39	2	743.901	1485.79	1486.79	2	0.0005313	0.3574	16	28	30690.7	1	4	4	14	0.00101	0.159	possibly correct	TRUE	R	L	TRUE		File Name: S_2-1.raw (F057099)	pep:novel scaffold:cavPor3:scaffold_81:3026472:3041363:-1 gene:ENSCPOG00000023840 transcript:ENSCPOT00000025252	Cavia_porcellus.cavPor3.59.pep.fasta
Spectrum37452 scans:10507,	DVFTkGYGFGLIK	k5: Acetyl (+42.01)	ENSCPOP00000017704	Mito-rich	Mito_GP1	0.95	74	27.7	66.2	5.68	2	743.901	1485.79	1486.79	2	0.0002913	0.196	16	28	30690.7	1	4	4	14	0.00101	0.159	possibly correct	TRUE	R	L	TRUE		File Name: S_2-1.raw (F057099)	pep:novel scaffold:cavPor3:scaffold_81:3026472:3041363:-1 gene:ENSCPOG00000023840 transcript:ENSCPOT00000025252	Cavia_porcellus.cavPor3.59.pep.fasta
Spectrum37457 scans:10513,	DVFTkGYGFGLIK	k5: Acetyl (+42.01)	ENSCPOP00000017704	Mito-rich	Mito_GP1	0.95	78.6	27.6	69.4	5.59	2	743.901	1485.79	1486.79	2	0.0006513	0.4381	16	28	30690.7	1	4	4	14	0.00101	0.159	possibly correct	TRUE	R	L	TRUE		File Name: S_2-1.raw (F057099)	pep:novel scaffold:cavPor3:scaffold_81:3026472:3041363:-1 gene:ENSCPOG00000023840 transcript:ENSCPOT00000025252	Cavia_porcellus.cavPor3.59.pep.fasta
Spectrum28694 scans:10638,	DVFTkGYGFGLIK	k5: Acetyl (+42.01)	ENSCPOP00000017704	Mito-rich	Mito_GP1	0.95	83.6	27.6	72.6	5.35	2	743.901	1485.79	1486.79	2	0.001271	0.8551	16	28	30690.7	1	4	4	14	0.00101	0.159	possibly correct	TRUE	R	L	TRUE		File Name: S_2-1.raw (F057099)	pep:novel scaffold:cavPor3:scaffold_81:3026472:3041363:-1 gene:ENSCPOG00000023840 transcript:ENSCPOT00000025252	Cavia_porcellus.cavPor3.59.pep.fasta
Spectrum36656 scans:9654,	FGIAAkYQIDPDAcFSAK	k6: Acetyl (+42.01), c14: Carbamidomethyl (+57.02)	ENSCPOP00000017704	Mito-rich	Mito_GP1	0.95	55.2	26.2	49.1	2.96	2	1022.5	2042.98	2043.98	2	0.000346	0.1693	219	236	30690.7	1	4	4	14	0.00101	0.159	possibly correct	TRUE	R	V	TRUE		File Name: S_2-1.raw (F057099)	pep:novel scaffold:cavPor3:scaffold_81:3026472:3041363:-1 gene:ENSCPOG00000023840 transcript:ENSCPOT00000025252	Cavia_porcellus.cavPor3.59.pep.fasta
Spectrum27866 scans:9765,	FGIAAkYQIDPDAcFSAK	k6: Acetyl (+42.01), c14: Carbamidomethyl (+57.02)	ENSCPOP00000017704	Mito-rich	Mito_GP1	0.95	55.5	26.2	54.7	6.1	2	1022.5	2042.98	2043.98	2	-0.001474	-0.7211	219	236	30690.7	1	4	4	14	0.00101	0.159	possibly correct	TRUE	R	V	TRUE		File Name: S_2-1.raw (F057099)	pep:novel scaffold:cavPor3:scaffold_81:3026472:3041363:-1 gene:ENSCPOG00000023840 transcript:ENSCPOT00000025252	Cavia_porcellus.cavPor3.59.pep.fasta
Spectrum6165 scans:9047,	FGIAAkYQIDPDAcFSAK	k6: Acetyl (+42.01), c14: Carbamidomethyl (+57.02)	ENSCPOP00000017704	Mito-rich	Mito_GP1	0.95	71.6	26.5	66	6.23	2	1022.5	2042.98	2043.98	2	0.000726	0.3552	219	236	30690.7	1	4	4	14	0.00101	0.159	possibly correct	TRUE	R	V	TRUE		File Name: S_2-1.raw (F057099)	pep:novel scaffold:cavPor3:scaffold_81:3026472:3041363:-1 gene:ENSCPOG00000023840 transcript:ENSCPOT00000025252	Cavia_porcellus.cavPor3.59.pep.fasta
Spectrum27854 scans:9752,	FGIAAkYQIDPDAcFSAK	k6: Acetyl (+42.01), c14: Carbamidomethyl (+57.02)	ENSCPOP00000017704	Mito-rich	Mito_GP1	0.95	81.2	26.2	72.3	5.16	2	1022.5	2042.98	2043.98	2	-0.001234	-0.6037	219	236	30690.7	1	4	4	14	0.00101	0.159	possibly correct	TRUE	R	V	TRUE		File Name: S_2-1.raw (F057099)	pep:novel scaffold:cavPor3:scaffold_81:3026472:3041363:-1 gene:ENSCPOG00000023840 transcript:ENSCPOT00000025252	Cavia_porcellus.cavPor3.59.pep.fasta
Spectrum28910 scans:10868,	GYGFGLIkLDLK	k8: Acetyl (+42.01)	ENSCPOP00000017704	Mito-rich	Mito_GP1	0.95	38.1	25	31.2	3.89	2	683.393	1364.77	1365.78	2	0.0005913	0.433	21	32	30690.7	1	4	4	14	0.00101	0.159	possibly correct	TRUE	K	T	TRUE		File Name: S_2-1.raw (F057099)	pep:novel scaffold:cavPor3:scaffold_81:3026472:3041363:-1 gene:ENSCPOG00000023840 transcript:ENSCPOT00000025252	Cavia_porcellus.cavPor3.59.pep.fasta
Spectrum37658 scans:10733,	GYGFGLIkLDLK	k8: Acetyl (+42.01)	ENSCPOP00000017704	Mito-rich	Mito_GP1	0.95	41.8	25	36.3	1.02	2	683.393	1364.77	1365.78	2	0.0004713	0.3451	21	32	30690.7	1	4	4	14	0.00101	0.159	possibly correct	TRUE	K	T	TRUE		File Name: S_2-1.raw (F057099)	pep:novel scaffold:cavPor3:scaffold_81:3026472:3041363:-1 gene:ENSCPOG00000023840 transcript:ENSCPOT00000025252	Cavia_porcellus.cavPor3.59.pep.fasta
Spectrum28916 scans:10875,	GYGFGLIkLDLK	k8: Acetyl (+42.01)	ENSCPOP00000017704	Mito-rich	Mito_GP1	0.95	45.9	25	37.9	1.85	2	683.393	1364.77	1365.78	2	0.0009713	0.7112	21	32	30690.7	1	4	4	14	0.00101	0.159	possibly correct	TRUE	K	T	TRUE		File Name: S_2-1.raw (F057099)	pep:novel scaffold:cavPor3:scaffold_81:3026472:3041363:-1 gene:ENSCPOG00000023840 transcript:ENSCPOT00000025252	Cavia_porcellus.cavPor3.59.pep.fasta
Spectrum10940 scans:4794,	VTGSLETkYR	k8: Acetyl (+42.01)	ENSCPOP00000017704	Mito-rich	Mito_GP1	0.95	41.7	25.6	36.2	0.77	2	598.319	1194.62	1195.63	2	-0.0006687	-0.5592	54	63	30690.7	1	4	4	14	0.00101	0.159	possibly correct	TRUE	K	W	TRUE		File Name: S_2-1.raw (F057099)	pep:novel scaffold:cavPor3:scaffold_81:3026472:3041363:-1 gene:ENSCPOG00000023840 transcript:ENSCPOT00000025252	Cavia_porcellus.cavPor3.59.pep.fasta
Spectrum1332 scans:3727,	VTGSLETkYR	k8: Acetyl (+42.01)	ENSCPOP00000017704	Mito-rich	Mito_GP1	0.95	73.9	25.6	59.6	1.4	2	598.319	1194.62	1195.63	2	-4.865e-05	-0.04069	54	63	30690.7	1	4	4	14	0.00101	0.159	possibly correct	TRUE	K	W	TRUE		File Name: S_2-1.raw (F057099)	pep:novel scaffold:cavPor3:scaffold_81:3026472:3041363:-1 gene:ENSCPOG00000023840 transcript:ENSCPOT00000025252	Cavia_porcellus.cavPor3.59.pep.fasta
Spectrum4040 scans:6780,	McLVEIEkAPK	c2: Carbamidomethyl (+57.02), k8: Acetyl (+42.01)	ENSCPOP00000005002	Mito-rich	Mito_GP1	0.95	49.2	27.4	24.8	3.6	2	680.354	1358.69	1359.7	2	-0.000294	-0.2162	78	88	78989.4	1	3	3	14	0.00101	0.0552	possibly correct	TRUE	R	V	TRUE		File Name: S_2-1.raw (F057099)	pep:novel scaffold:cavPor3:scaffold_13:39857037:39884518:-1 gene:ENSCPOG00000005555 transcript:ENSCPOT00000005614	Cavia_porcellus.cavPor3.59.pep.fasta
Spectrum2627 scans:5248,	mcLVEIEkAPK	m1: Oxidation (+15.99), c2: Carbamidomethyl (+57.02), k8: Acetyl (+42.01)	ENSCPOP00000005002	Mito-rich	Mito_GP1	0.95	51.2	26.9	12.4	3.41	2	688.352	1374.69	1375.7	2	0.000391	0.2842	78	88	78989.4	1	3	3	14	0.00101	0.0552	possibly correct	TRUE	R	V	TRUE		File Name: S_2-1.raw (F057099)	pep:novel scaffold:cavPor3:scaffold_13:39857037:39884518:-1 gene:ENSCPOG00000005555 transcript:ENSCPOT00000005614	Cavia_porcellus.cavPor3.59.pep.fasta
Spectrum25516 scans:7233,	McLVEIEkAPK	c2: Carbamidomethyl (+57.02), k8: Acetyl (+42.01)	ENSCPOP00000005002	Mito-rich	Mito_GP1	0.95	54.8	27.5	25	3.32	2	680.355	1358.69	1359.7	2	0.000666	0.4898	78	88	78989.4	1	3	3	14	0.00101	0.0552	possibly correct	TRUE	R	V	TRUE		File Name: S_2-1.raw (F057099)	pep:novel scaffold:cavPor3:scaffold_13:39857037:39884518:-1 gene:ENSCPOG00000005555 transcript:ENSCPOT00000005614	Cavia_porcellus.cavPor3.59.pep.fasta
Spectrum12759 scans:6743,	mcLVEIEkAPK	m1: Oxidation (+15.99), c2: Carbamidomethyl (+57.02), k8: Acetyl (+42.01)	ENSCPOP00000005002	Mito-rich	Mito_GP1	0.95	68.8	27	27.8	4.54	2	688.352	1374.69	1375.7	2	3.104e-05	0.02256	78	88	78989.4	1	3	3	14	0.00101	0.0552	possibly correct	TRUE	R	V	TRUE		File Name: S_2-1.raw (F057099)	pep:novel scaffold:cavPor3:scaffold_13:39857037:39884518:-1 gene:ENSCPOG00000005555 transcript:ENSCPOT00000005614	Cavia_porcellus.cavPor3.59.pep.fasta
Spectrum32878 scans:5529,	mcLVEIEkAPK	m1: Oxidation (+15.99), c2: Carbamidomethyl (+57.02), k8: Acetyl (+42.01)	ENSCPOP00000005002	Mito-rich	Mito_GP1	0.95	72.1	27	29.5	4.96	2	688.352	1374.69	1375.7	2	0.000151	0.1098	78	88	78989.4	1	3	3	14	0.00101	0.0552	possibly correct	TRUE	R	V	TRUE		File Name: S_2-1.raw (F057099)	pep:novel scaffold:cavPor3:scaffold_13:39857037:39884518:-1 gene:ENSCPOG00000005555 transcript:ENSCPOT00000005614	Cavia_porcellus.cavPor3.59.pep.fasta
Spectrum34339 scans:7140,	McLVEIEkAPK	c2: Carbamidomethyl (+57.02), k8: Acetyl (+42.01)	ENSCPOP00000005002	Mito-rich	Mito_GP1	0.95	72.4	27.3	31.7	3.51	2	680.354	1358.69	1359.7	2	0.000186	0.1368	78	88	78989.4	1	3	3	14	0.00101	0.0552	possibly correct	TRUE	R	V	TRUE		File Name: S_2-1.raw (F057099)	pep:novel scaffold:cavPor3:scaffold_13:39857037:39884518:-1 gene:ENSCPOG00000005555 transcript:ENSCPOT00000005614	Cavia_porcellus.cavPor3.59.pep.fasta
Spectrum24080 scans:5647,	mcLVEIEkAPK	m1: Oxidation (+15.99), c2: Carbamidomethyl (+57.02), k8: Acetyl (+42.01)	ENSCPOP00000005002	Mito-rich	Mito_GP1	0.95	72.5	27	31.7	4.96	2	688.352	1374.69	1375.7	2	-0.000109	-0.07921	78	88	78989.4	1	3	3	14	0.00101	0.0552	possibly correct	TRUE	R	V	TRUE		File Name: S_2-1.raw (F057099)	pep:novel scaffold:cavPor3:scaffold_13:39857037:39884518:-1 gene:ENSCPOG00000005555 transcript:ENSCPOT00000005614	Cavia_porcellus.cavPor3.59.pep.fasta
Spectrum4968 scans:7775,	VLQDIASGNHPFSQVLKAAk	k20: Acetyl (+42.01)	ENSCPOP00000005002	Mito-rich	Mito_GP1	0.932	23	28.1	0	-0.342	2	722.394	2164.16	2165.17	3	-0.005595	-2.584	452	471	78989.4	1	3	3	14	0.00101	0.0552	possibly correct	TRUE	K	K	TRUE		File Name: S_2-1.raw (F057099)	pep:novel scaffold:cavPor3:scaffold_13:39857037:39884518:-1 gene:ENSCPOG00000005555 transcript:ENSCPOT00000005614	Cavia_porcellus.cavPor3.59.pep.fasta
Spectrum26539 scans:8350,	VLQDIASGNHPFSQVLkAAK	k17: Acetyl (+42.01)	ENSCPOP00000005002	Mito-rich	Mito_GP1	0.95	21.9	27.8	5.11	1	2	722.396	2164.17	2165.17	3	0.001365	0.6306	452	471	78989.4	1	3	3	14	0.00101	0.0552	possibly correct	TRUE	K	K	TRUE		File Name: S_2-1.raw (F057099)	pep:novel scaffold:cavPor3:scaffold_13:39857037:39884518:-1 gene:ENSCPOG00000005555 transcript:ENSCPOT00000005614	Cavia_porcellus.cavPor3.59.pep.fasta
Spectrum6107 scans:8986,	YNHLGESPkVLQDIASGNHPFSQVLK	k9: Acetyl (+42.01)	ENSCPOP00000005002	Mito-rich	Mito_GP1	0.95	30.3	29.5	25.5	1.44	2	730.88	2919.49	2920.5	4	0.003519	1.205	443	468	78989.4	1	3	3	14	0.00101	0.0552	possibly correct	TRUE	R	A	TRUE		File Name: S_2-1.raw (F057099)	pep:novel scaffold:cavPor3:scaffold_13:39857037:39884518:-1 gene:ENSCPOG00000005555 transcript:ENSCPOT00000005614	Cavia_porcellus.cavPor3.59.pep.fasta
Spectrum16671 scans:10871,	YNHLGESPkVLQDIASGNHPFSQVLK	k9: Acetyl (+42.01)	ENSCPOP00000005002	Mito-rich	Mito_GP1	0.95	30.2	29.4	17.9	0.26	2	730.881	2919.49	2920.5	4	0.006199	2.123	443	468	78989.4	1	3	3	14	0.00101	0.0552	possibly correct	TRUE	R	A	TRUE		File Name: S_2-1.raw (F057099)	pep:novel scaffold:cavPor3:scaffold_13:39857037:39884518:-1 gene:ENSCPOG00000005555 transcript:ENSCPOT00000005614	Cavia_porcellus.cavPor3.59.pep.fasta
Spectrum36485 scans:9474,	YNHLGESPkVLQDIASGNHPFSQVLK	k9: Acetyl (+42.01)	ENSCPOP00000005002	Mito-rich	Mito_GP1	0.95	36.1	29.5	28.2	2.06	2	730.88	2919.49	2920.5	4	0.001079	0.3696	443	468	78989.4	1	3	3	14	0.00101	0.0552	possibly correct	TRUE	R	A	TRUE		File Name: S_2-1.raw (F057099)	pep:novel scaffold:cavPor3:scaffold_13:39857037:39884518:-1 gene:ENSCPOG00000005555 transcript:ENSCPOT00000005614	Cavia_porcellus.cavPor3.59.pep.fasta
Spectrum6027 scans:8902,	YNHLGESPkVLQDIASGNHPFSQVLK	k9: Acetyl (+42.01)	ENSCPOP00000005002	Mito-rich	Mito_GP1	0.95	41.8	29.4	34.1	2.39	2	730.88	2919.49	2920.5	4	0.004719	1.616	443	468	78989.4	1	3	3	14	0.00101	0.0552	possibly correct	TRUE	R	A	TRUE		File Name: S_2-1.raw (F057099)	pep:novel scaffold:cavPor3:scaffold_13:39857037:39884518:-1 gene:ENSCPOG00000005555 transcript:ENSCPOT00000005614	Cavia_porcellus.cavPor3.59.pep.fasta
Spectrum27697 scans:9587,	YNHLGESPkVLQDIASGNHPFSQVLK	k9: Acetyl (+42.01)	ENSCPOP00000005002	Mito-rich	Mito_GP1	0.95	48.2	29.5	38.1	3.29	2	730.88	2919.49	2920.5	4	0.003519	1.205	443	468	78989.4	1	3	3	14	0.00101	0.0552	possibly correct	TRUE	R	A	TRUE		File Name: S_2-1.raw (F057099)	pep:novel scaffold:cavPor3:scaffold_13:39857037:39884518:-1 gene:ENSCPOG00000005555 transcript:ENSCPOT00000005614	Cavia_porcellus.cavPor3.59.pep.fasta
Spectrum10904 scans:4755,	ALSkDLPK	k4: Acetyl (+42.01)	ENSCPOP00000003855	Mito-rich	Mito_GP1	0.95	24.1	25.2	10.4	0.824	2	457.271	912.528	913.535	2	-0.0002487	-0.2722	135	142	52716.7	1	6	7	50	0.00359	0.273	possibly correct	TRUE	K	V	TRUE		File Name: S_2-1.raw (F057099)	pep:novel scaffold:cavPor3:scaffold_8:23795660:23804749:-1 gene:ENSCPOG00000004273 transcript:ENSCPOT00000004318	Cavia_porcellus.cavPor3.59.pep.fasta
Spectrum1274 scans:3642,	ALSkDLPK	k4: Acetyl (+42.01)	ENSCPOP00000003855	Mito-rich	Mito_GP1	0.95	30.2	25.2	22.2	0.585	2	457.271	912.528	913.535	2	-0.0002487	-0.2722	135	142	52716.7	1	6	7	50	0.00359	0.273	possibly correct	TRUE	K	V	TRUE		File Name: S_2-1.raw (F057099)	pep:novel scaffold:cavPor3:scaffold_8:23795660:23804749:-1 gene:ENSCPOG00000004273 transcript:ENSCPOT00000004318	Cavia_porcellus.cavPor3.59.pep.fasta
Spectrum37482 scans:10540,	EVcSkYFYDQcPAVAGFGPIEQLPDYNR	c3: Carbamidomethyl (+57.02), k5: Acetyl (+42.01), c11: Carbamidomethyl (+57.02)	ENSCPOP00000003855	Mito-rich	Mito_GP1	0.95	0	0	0	3.07	2	1122.85	3365.53	3365.52	3	1.01	2.218	443	470	52716.7	1	6	7	50	0.00359	0.273	possibly correct	TRUE	R	I	TRUE		File Name: S_2-1.raw (F057099)	pep:novel scaffold:cavPor3:scaffold_8:23795660:23804749:-1 gene:ENSCPOG00000004273 transcript:ENSCPOT00000004318	Cavia_porcellus.cavPor3.59.pep.fasta
Spectrum6977 scans:9903,	EVcSkYFYDQcPAVAGFGPIEQLPDYNR	c3: Carbamidomethyl (+57.02), k5: Acetyl (+42.01), c11: Carbamidomethyl (+57.02)	ENSCPOP00000003855	Mito-rich	Mito_GP1	0.95	41.1	25	33.5	4.11	2	1122.51	3364.52	3365.52	3	0.001295	0.3847	443	470	52716.7	1	6	7	50	0.00359	0.273	possibly correct	TRUE	R	I	TRUE		File Name: S_2-1.raw (F057099)	pep:novel scaffold:cavPor3:scaffold_8:23795660:23804749:-1 gene:ENSCPOG00000004273 transcript:ENSCPOT00000004318	Cavia_porcellus.cavPor3.59.pep.fasta
Spectrum37494 scans:10554,	EVcSkYFYDQcPAVAGFGPIEQLPDYNR	c3: Carbamidomethyl (+57.02), k5: Acetyl (+42.01), c11: Carbamidomethyl (+57.02)	ENSCPOP00000003855	Mito-rich	Mito_GP1	0.95	41.1	25	38.3	3.96	2	1122.51	3364.52	3365.52	3	0.002375	0.7056	443	470	52716.7	1	6	7	50	0.00359	0.273	possibly correct	TRUE	R	I	TRUE		File Name: S_2-1.raw (F057099)	pep:novel scaffold:cavPor3:scaffold_8:23795660:23804749:-1 gene:ENSCPOG00000004273 transcript:ENSCPOT00000004318	Cavia_porcellus.cavPor3.59.pep.fasta
Spectrum28728 scans:10674,	EVcSkYFYDQcPAVAGFGPIEQLPDYNR	c3: Carbamidomethyl (+57.02), k5: Acetyl (+42.01), c11: Carbamidomethyl (+57.02)	ENSCPOP00000003855	Mito-rich	Mito_GP1	0.95	57	25	54.3	6.55	2	1122.51	3364.52	3365.52	3	-0.0009253	-0.2749	443	470	52716.7	1	6	7	50	0.00359	0.273	possibly correct	TRUE	R	I	TRUE		File Name: S_2-1.raw (F057099)	pep:novel scaffold:cavPor3:scaffold_8:23795660:23804749:-1 gene:ENSCPOG00000004273 transcript:ENSCPOT00000004318	Cavia_porcellus.cavPor3.59.pep.fasta
Spectrum25764 scans:7504,	NRPGSALEkEVESmGAHLNAYSTR	k9: Acetyl (+42.01), m14: Oxidation (+15.99)	ENSCPOP00000003855	Mito-rich	Mito_GP1	0.938	0	0	0	2.49	2	892.767	2675.28	2675.28	3	1.002	-0.2908	103	126	52716.7	1	6	7	50	0.00359	0.273	possibly correct	TRUE	K	E	TRUE		File Name: S_2-1.raw (F057099)	pep:novel scaffold:cavPor3:scaffold_8:23795660:23804749:-1 gene:ENSCPOG00000004273 transcript:ENSCPOT00000004318	Cavia_porcellus.cavPor3.59.pep.fasta
[truncated: 11,636 more rows]

## Sheet: Peptide Report (All Peptides)
All Peptides: All peptides eluted from the Anti-acetyl-Lysine immunocapture (acetylated and unacetylated)
Database Set: 1 Database
	Database Name: unknown
		Version: unknown
		Taxonomy: All Entries
[truncated: 5,698 more rows]

## Sheet: K(Ac)S Peptides
Acetylated Peptide with K(Ac)S	Accession	Name
[truncated: 43 more rows]
