# Supplementary material for: The Cardiac Acetyl-Lysine Proteome
Source: PLoS One. 2013 Jul 2;8(7):e67513. doi: 10.1371/journal.pone.0067513 (PMC3699649; doi:10.1371/journal.pone.0067513)
Supplement: Table S2 — Acetyl-proteins & Sites. Sheet 1: Additional annotation is provided for Figure 3 in the manuscript, including the numbering of orthologous lysines in human sequences. A simplified gene ontology annotation (GO SLIM) is also provided as well as the distribution of identified peptides across biological samples and subcellular fractions. Sheet 2 provides a list of the genes represented in our dataset that were not present in the studies of Choudhary et al [3]., Zhao et al [6]. or Kim et al [4]. (XLSX) [file pone.0067513.s002.xlsx]

## Sheet: Acetylated Proteins
Identified Acetylated Proteins and Distribution of Unique Acetylated Peptides
Ensembl Protein ID	Gene Name	Description	# of Acetyl- sites	Acetyl- sites (Guinea Pig A.A. Sequence)	Orthologous Lysines (Human A.A. Sequence)	Cellular Component	Function	Term (CC)	Weight	Cyto_GP1	Cyto_GP2	Cyto_GP3	PM_GP3	PM_GP2	PM_GP1	Mito_GP1	Mito_GP3	Mito_GP2	Myo_GP1	Myo_GP2	Myo_GP3	Specific Notation Associated with Protein Accession	Protein Grouping Ambiguity	Nature of Ambiguity	Ensembl Family Description
ENSCPOP00000004280	DECR1	2,4-dienoyl CoA reductase 1, mitochondrial [Source:HGNC Symbol; Acc:2753]	4	78; 114; 211; 241	97; 133; 230; 260	Mitochondrion	Fatty Acid Metabolism	GO:0005739	66 kDa	2	0	0	0	0	0	0	0	0	0	0	0	pep:nown scaffold:cavPor3:scaffold_85:1756656:1785432:-1 gene:ENSCPOG00000004869 transcript:ENSCPOT00000004921			2 4 DIENOYL COA REDUCTASE MITOCHONDRIAL PRECURSOR EC_1.3.1.34 2 4 DIENOYL COA REDUCTASE [NADPH] 4 ENOYL COA REDUCTASE [NADPH]
ENSCPOP00000018880	BDH1	3-hydroxybutyrate dehydrogenase, type 1 [Source:HGNC Symbol; Acc:1027]	1	132	132	Mitochondrion	Fatty Acid Metabolism	GO:0005739	38 kDa	0	0	0	0	0	0	1	1	0	0	0	0	pep:novel scaffold:cavPor3:scaffold_7:59059204:59078481:1 gene:ENSCPOG00000026990 transcript:ENSCPOT00000027372			D BETA HYDROXYBUTYRATE DEHYDROGENASE MITOCHONDRIAL PRECURSOR BDH EC_1.1.1.30 3 HYDROXYBUTYRATE DEHYDROGENASE
ENSCPOP00000017738	HIBADH	3-hydroxyisobutyrate dehydrogenase [Source:HGNC Symbol; Acc:4907]	2	81; 85	238; 242	Mitochondrion	Protein Synthesis, Metabolism & Folding	GO:0005739	19 kDa	2	2	1	0	0	1	2	1	0	2	0	1	pep:novel scaffold:cavPor3:scaffold_44:4240293:4252180:-1 gene:ENSCPOG00000020159 transcript:ENSCPOT00000025371			3 HYDROXYISOBUTYRATE DEHYDROGENASE MITOCHONDRIAL HIBADH EC_1.1.1.31
ENSCPOP00000007975	HIBCH	3-hydroxyisobutyryl-CoA hydrolase [Source:HGNC Symbol; Acc:4908]	5	55; 257; 267; 300; 353	55; 257; 267; ---; 353	Mitochondrion	Protein Synthesis, Metabolism & Folding	GO:0005739	43 kDa	1	0	2	0	0	0	2	0	1	1	0	2	pep:novel scaffold:cavPor3:scaffold_3:2177436:2208713:1 gene:ENSCPOG00000008879 transcript:ENSCPOT00000008959			3 HYDROXYISOBUTYRYL COA HYDROLASE MITOCHONDRIAL PRECURSOR EC_3.1.2.4 3 HYDROXYISOBUTYRYL COENZYME A HYDROLASE HIB COA HYDROLASE HIBYL COA H
ENSCPOP00000007766	HMGCL	3-hydroxymethyl-3-methylglutaryl-CoA lyase [Source:HGNC Symbol; Acc:5005]	1	48	48	Mitochondrion	Fatty Acid Metabolism	GO:0005739	34 kDa	0	0	0	0	0	0	0	0	0	1	0	0	pep:novel scaffold:cavPor3:scaffold_25:11776735:11789773:1 gene:ENSCPOG00000008645 transcript:ENSCPOT00000008723			HYDROXYMETHYLGLUTARYL COA LYASE MITOCHONDRIAL PRECURSOR HMG COA LYASE HL EC_4.1.3.4 3 HYDROXY 3 METHYLGLUTARATE COA LYASE
ENSCPOP00000011673	OXCT1	3-oxoacid CoA transferase 1 [Source:HGNC Symbol; Acc:8527]	5	296; 421; 455; 473; 480	296; 421; 455; 473; 480	Mitochondrion	Krebs Cycle	GO:0005739	56 kDa	3	2	4	1	0	2	5	5	5	3	3	4	pep:novel scaffold:cavPor3:scaffold_29:14939013:15052270:1 gene:ENSCPOG00000012966 transcript:ENSCPOT00000013091			SUCCINYL COA:3 ketoACID COENZYME A TRANSFERASE 1 MITOCHONDRIAL PRECURSOR EC_2.8.3.5 3 OXOACID COA TRANSFERASE 1 SOMATIC TYPE SUCCINYL COA:3 OXOACID COA TRANSFERASE SCOT S
ENSCPOP00000013564	ACAT1	acetyl-CoA acetyltransferase 1 [Source:HGNC Symbol; Acc:93]	9	83; 87; 174; 190; 202; 251; 257; 263; 307	---; 174; 190; 202; 251; 257; 263; 83; 87	Mitochondrion	Fatty Acid Metabolism	GO:0005739	45 kDa	0	0	0	1	0	1	4	5	6	6	1	6	pep:novel scaffold:cavPor3:scaffold_136:798095:818006:1 gene:ENSCPOG00000015048 transcript:ENSCPOT00000015195			ACETYL COA ACETYLTRANSFERASE EC_2.3.1.9 ACETOACETYL COA THIOLASE
ENSCPOP00000004266	ACAA2	acetyl-CoA acyltransferase 2 [Source:HGNC Symbol; Acc:83]	10	25; 38; 81; 173; 181; 234; 240; 270; 312; 340	25; 38; 81; 173; 181; 234; 240; 270; 312; 340	Mitochondrion	Fatty Acid Metabolism	GO:0005739	34 kDa	0	0	0	0	0	0	2	0	0	3	2	2	pep:novel scaffold:cavPor3:scaffold_0:24974944:25000060:-1 gene:ENSCPOG00000004748 transcript:ENSCPOT00000004799			ACETYL COA ACETYLTRANSFERASE EC_2.3.1.9 ACETOACETYL COA THIOLASE
ENSCPOP00000011373	ACO2	aconitase 2, mitochondrial [Source:HGNC Symbol; Acc:118]	11	50; 57; 138; 228; 304; 305; 309; 517; 523; 605; 723	50; 57; 138; 228; 304; 305; 309; --- ; ---; 605; 723	Mitochondrion	Krebs Cycle	GO:0005739	85 kDa	4	5	7	1	0	2	6	7	3	3	2	4	pep:novel scaffold:cavPor3:scaffold_28:25045513:25081094:1 gene:ENSCPOG00000012642 transcript:ENSCPOT00000012763			ACONITATE HYDRATASE MITOCHONDRIAL PRECURSOR ACONITASE EC_4.2.1.3 CITRATE HYDRO LYASE
ENSCPOP00000012587	ACTN2	actinin, alpha 2 [Source:HGNC Symbol; Acc:164]	2	96; 584	96; 584	Sarcomere	Other	GO:0030018	104 kDa	0	0	0	0	0	0	0	0	0	0	1	1	pep:novel scaffold:cavPor3:scaffold_16:5484889:5557403:1 gene:ENSCPOG00000013969 transcript:ENSCPOT00000014110	TRUE	non-acetylated peptides shared with ENSCPOP00000001002 and …10708	ALPHA ACTININ ALPHA ACTININ F ACTIN CROSS LINING
ENSCPOP00000001264	ACAD10	acyl-CoA dehydrogenase family, member 10 [Source:HGNC Symbol; Acc:21597]	1	1055	1052	Mitochondrion	Fatty Acid Metabolism		119 kDa	0	0	0	0	0	0	0	0	1	0	0	0	pep:novel scaffold:cavPor3:scaffold_115:2986760:3023270:1 gene:ENSCPOG00000001399 transcript:ENSCPOT00000001418			ACYL COA DEHYDROGENASE FAMILY MEMBER ACAD EC_1.3.99.-
ENSCPOP00000013906	ACADS	acyl-CoA dehydrogenase, C-2 to C-3 short chain [Source:HGNC Symbol; Acc:90]	4	53; 139; 264; 308	51; ---; 262; 306	Mitochondrion	Fatty Acid Metabolism	GO:0005739	45 kDa	0	0	0	0	0	0	3	0	0	1	2	2	pep:novel scaffold:cavPor3:scaffold_4:5796066:5808668:1 gene:ENSCPOG00000015423 transcript:ENSCPOT00000015574			SHORT/BRANCHED CHAIN SPECIFIC ACYL COA DEHYDROGENASE MITOCHONDRIAL PRECURSOR SBCAD EC_1.3.99.- 2 METHYL BRANCHED CHAIN ACYL COA DEHYDROGENASE 2 MEBCAD 2 METHYLBUTYRYL COENZYME A DEHYDROGENASE 2 METHYLBUTYRYL COA DEHYDROGENASE
ENSCPOP00000010012	ACADM	acyl-CoA dehydrogenase, C-4 to C-12 straight chain [Source:HGNC Symbol; Acc:89]	4	79; 252; 297; 414	"---; 256; 301; ---	Mitochondrion	Fatty Acid Metabolism	GO:0005739	46 kDa	1	0	0	0	0	0	1	3	2	0	0	0	pep:novel scaffold:cavPor3:scaffold_2:59559624:59581421:-1 gene:ENSCPOG00000011134 transcript:ENSCPOT00000011238			MEDIUM CHAIN SPECIFIC ACYL COA DEHYDROGENASE MITOCHONDRIAL PRECURSOR MCAD EC_1.3.99.3
ENSCPOP00000008856	ACADL	acyl-CoA dehydrogenase, long chain [Source:HGNC Symbol; Acc:88]	9	41; 56; 67; 215; 229; 254; 293; 297; 333	66; 81; 92; 240; 254; 279; 293; 322; 358	Mitochondrion	Fatty Acid Metabolism	GO:0005739	45 kDa	7	6	8	0	1	3	7	6	7	5	4	5	pep:novel scaffold:cavPor3:scaffold_13:43106696:43133822:-1 gene:ENSCPOG00000009871 transcript:ENSCPOT00000009960			LONG CHAIN SPECIFIC ACYL COA DEHYDROGENASE MITOCHONDRIAL PRECURSOR LCAD EC_1.3.99.13
ENSCPOP00000011134 (+1)	ACADSB	acyl-CoA dehydrogenase, short/branched chain [Source:HGNC Symbol; Acc:91]	6	76; 147; 257; 266; 272; 414	88;159; 269; ---; 284; 426;	Mitochondrion	Fatty Acid Metabolism		46 kDa	2	4	2	0	1	2	4	4	5	5	3	4	pep:novel scaffold:cavPor3:scaffold_1:44847412:44865680:-1 gene:ENSCPOG00000012372 transcript:ENSCPOT00000012490
ENSCPOP00000014862	ACADVL	acyl-CoA dehydrogenase, very long chain [Source:HGNC Symbol; Acc:92]	8	120; 238; 275; 277; 297; 298; 634; 638	121; 239; 276; 278; 298; 299; 635; 639	Mitochondrion	Fatty Acid Metabolism	GO:0005739	70 kDa	3	3	4	0	1	5	7	5	6	3	3	5	pep:novel scaffold:cavPor3:scaffold_61:9395190:9400078:-1 gene:ENSCPOG00000020114 transcript:ENSCPOT00000020475			VERY LONG CHAIN SPECIFIC ACYL COA DEHYDROGENASE MITOCHONDRIAL PRECURSOR EC_1.3.99.-
ENSCPOP00000011954	ACSF2	acyl-CoA synthetase family member 2 [Source:HGNC Symbol; Acc:26101]	7	32; 128; 129; 139; 142; 151; 459	72; 168; 169; 179; 182; 191; ---	Mitochondrion	Fatty Acid Metabolism	GO:0005739	64 kDa	3	3	4	0	0	0	5	4	3	5	3	3	pep:novel scaffold:cavPor3:scaffold_53:7298438:7312532:-1 gene:ENSCPOG00000013278 transcript:ENSCPOT00000013407			ACYL COA SYNTHETASE FAMILY MEMBER 2 MITOCHONDRIAL PRECURSOR EC_6.2.1.-
ENSCPOP00000011654	ACSF3	acyl-CoA synthetase family member 3 [Source:HGNC Symbol; Acc:27288]	2	325; 384	324; ---	Mitochondrion	Fatty Acid Metabolism	GO:0005739	65 kDa	0	0	2	0	0	0	2	2	2	2	1	2	pep:novel scaffold:cavPor3:scaffold_232:23528:45611:1 gene:ENSCPOG00000012945 transcript:ENSCPOT00000013070			ACYL COA SYNTHETASE FAMILY MEMBER 3 MITOCHONDRIAL PRECURSOR EC_6.2.1.-
ENSCPOP00000003780	ACSS2	acyl-CoA synthetase short-chain family member 2 [Source:HGNC Symbol; Acc:15814]	1	434	418	Cytoplasm		GO:0005737	53 kDa	0	0	0	2	2	2	6	5	3	4	1	4	pep:novel scaffold:cavPor3:scaffold_8:23795660:23804749:-1 gene:ENSCPOG00000004273 transcript:ENSCPOT00000004318			ACETYL COENZYME A SYNTHETASE EC_6.2.1.1 ACETATE COA LIGASE ACYL ACTIVATING ENZYME
ENSCPOP00000020345	ACOT13	acyl-CoA thioesterase 13 [Source:HGNC Symbol; Acc:20999]	3	36; 42; 126	37; 43; 127	Mitochondrion	Fatty Acid Metabolism	GO:0005739	15 kDa	0	2	2	0	0	0	3	3	2	3	3	3	pep:novel scaffold:cavPor3:scaffold_38:18957559:18973731:1 gene:ENSCPOG00000019753 transcript:ENSCPOT00000026554			ACYL COENZYME A THIOESTERASE 13 ACYL COA THIOESTERASE 13 EC_3.1.2.- THIOESTERASE SUPERFAMILY MEMBER 2
ENSCPOP00000013280	AHCY	adenosylhomocysteinase [Source:HGNC Symbol; Acc:343]	3	43; 166; 170	43; 166; ---	Cytoplasm	Signaling, Redox & Misc		47 kDa	2	1	1	0	0	0	0	0	0	0	0	0	pep:novel scaffold:cavPor3:scaffold_45:1187560:1200928:-1 gene:ENSCPOG00000014740 transcript:ENSCPOT00000014885			ADENOSYLHOMOCYSTEINASE ADOHCYASE EC_3.3.1.1 S ADENOSYL L HOMOCYSTEINE HYDROLASE
ENSCPOP00000010730	A3	adenylate kinase 3 [Source:HGNC Symbol; Acc:17376]	5	35; 81; 166; 190; 191	80; 165; 189; 190; 34	Mitochondrion	Apoptosis & Misc	GO:0005739	26 kDa	4	2	4	0	0	0	1	2	1	2	2	5	pep:novel scaffold:cavPor3:scaffold_21:15123631:15146990:1 gene:ENSCPOG00000011927 transcript:ENSCPOT00000012042			GTP:AMP PHOSPHOTRANSFERASE MITOCHONDRIAL EC_2.7.4.10 ADENYLATE kkinase 3 A 3 ADENYLATE kkinase 3 ALPHA 1
ENSCPOP00000005809	ALDH1L1	aldehyde dehydrogenase 1 family, member L1 [Source:HGNC Symbol; Acc:3978]	4	41; 44; 666; 888	57; 60; 660; 882	Mitochondrion	Redox		108 kDa	0	0	0	0	0	0	0	0	1	0	0	0	pep:novel scaffold:cavPor3:scaffold_19:28931012:28940008:-1 gene:ENSCPOG00000006501 transcript:ENSCPOT00000006566
ENSCPOP00000012030	ALDH2	aldehyde dehydrogenase 2 family (mitochondrial) [Source:HGNC Symbol; Acc:404]	4	77; 82; 85; 372	73; 78; 81; 368	Mitochondrion	Redox	GO:0005739	57 kDa	2	0	0	0	0	0	0	1	1	1	0	2	pep:novel scaffold:cavPor3:scaffold_115:3032722:3062306:1 gene:ENSCPOG00000013363 transcript:ENSCPOT00000013494			ALDEHYDE DEHYDROGENASE
ENSCPOP00000013961	ALDH4A1	aldehyde dehydrogenase 4 family, member A1 [Source:HGNC Symbol; Acc:406]	2	413; 419	93; 99	Mitochondrion	Redox	GO:0005739	161 kDa	0	0	0	0	0	0	2	0	0	1	0	0	pep:novel scaffold:cavPor3:scaffold_25:16197281:16256636:1 gene:ENSCPOG00000015480 transcript:ENSCPOT00000015632			DELTA 1 PYRROLINE 5 CARBOXYLATE DEHYDROGENASE MITOCHONDRIAL PRECURSOR P5C DEHYDROGENASE EC_1.5.1.12 ALDEHYDE DEHYDROGENASE FAMILY 4 MEMBER A1
ENSCPOP00000000012	ALDH6A1	aldehyde dehydrogenase 6 family, member A1 [Source:HGNC Symbol; Acc:7179]	7	45; 50; 53; 74; 111; 115; 127	47; 52; 55; 76; 113; 117; 129;	Mitochondrion	Redox	GO:0005739	58 kDa	3	4	4	0	1	0	7	7	6	1	1	4	pep:novel scaffold:cavPor3:scaffold_20:18244261:18266481:-1 gene:ENSCPOG00000000015 transcript:ENSCPOT00000000015			METHYLMALONATE SEMIALDEHYDE DEHYDROGENASE [ACYLATING] MITOCHONDRIAL PRECURSOR MALONATE SEMIALDEHYDE DEHYDROGENASE [ACYLATING] MMSDH EC_1.2.1.27 EC_1.2.1.- 18 ALDEHYDE DEHYDROGENASE FAMILY 6 MEMBER A1
ENSCPOP00000011810	ALDH7A1	aldehyde dehydrogenase 7 family, member A1 [Source:HGNC Symbol; Acc:877]	6	65; 66; 352; 361; 411; 434	93; 94; ---; 389; 439; 462	Mitochondrion	Redox	GO:0005739	55 kDa	3	1	2	0	0	0	4	3	4	3	0	4	pep:novel scaffold:cavPor3:scaffold_6:17231705:17263534:1 gene:ENSCPOG00000013120 transcript:ENSCPOT00000013247			ALPHA AMINOADIPIC SEMIALDEHYDE DEHYDROGENASE PRECURSOR ALPHA AASA DEHYDROGENASE EC_1.2.1.31 BETAINE ALDEHYDE DEHYDROGENASE EC_1.2.1.- 8 DELTA1 PIPERIDEINE 6 CARBOXYLATE DEHYDROGENASE P6C DEHYDROGENASE ALDEHYDE DEHYDROGENASE FAMILY 7 MEMBER A1 EC_1.2.-.- 1
ENSCPOP00000001164	AR1B1	aldo-keto reductase family 1, member B1 (aldose reductase) [Source:HGNC Symbol; Acc:381]	1	263	263	Cytoplasm	Signaling, Redox & Misc		36 kDa	1	0	0	0	0	0	0	0	0	0	0	0	pep:novel scaffold:cavPor3:scaffold_44:8767055:8784056:1 gene:ENSCPOG00000001285 transcript:ENSCPOT00000001301			REDUCTASE
ENSCPOP00000006706	ALDOA	aldolase A, fructose-bisphosphate [Source:HGNC Symbol; Acc:414]	2	42; 108	42; 108	Cytoplasm	Glucose Metabolism	GO:0015629	28 kDa	0	1	1	0	0	0	1	1	1	1	0	2	pep:novel scaffold:cavPor3:scaffold_1:48814222:48823901:1 gene:ENSCPOG00000007447 transcript:ENSCPOT00000007519			FRUCTOSE BISPHOSPHATE ALDOLASE EC_4.1.2.13 TYPE ALDOLASE
ENSCPOP00000013843	APF	Alpha-1-antiproteinase F precursor (APF) (Alpha-1-antitrypsin) (Alpha- 1-proteinase inhibitor) (Fragment). [Source:UniProtB/Swiss-Prot; Acc:P22324]	3	164; 172; 283	179; 187; ---	Membrane Assoc. & Misc.		GO:0005576	45 kDa	1	1	1	0	0	0	0	0	0	0	0	0	pep:nown scaffold:cavPor3:scaffold_114:814331:819125:1 gene:ENSCPOG00000015330 transcript:ENSCPOT00000015507	TRUE	Protein was identified uniquely but acetylated peptides are common to isoforms ENSCP0P00000011412 and/or …13842	PRECURSOR
ENSCPOP00000011640	CRYAB	AlphaB-crystallin. [Source:UniProtB/TrEMBL; Acc:A9LPA2]	2	174; 175	174; 175	Cytoskeleton	Cytoskeleton	GO:0005737	20 kDa	1	0	1	0	0	0	0	0	0	0	0	0	pep:nown scaffold:cavPor3:scaffold_19:35866009:35869151:1 gene:ENSCPOG00000012928 transcript:ENSCPOT00000013053			ALPHA CRYSTALLIN B CHAIN ALPHA B CRYSTALLIN
ENSCPOP00000013152	ANXA1	annexin A1 [Source:HGNC Symbol; Acc:533]	2	97; 312	97; 312	Cytoplasm		GO:0042383	39 kDa	2	1	1	0	0	0	0	0	0	0	0	0	pep:novel scaffold:cavPor3:scaffold_21:24549965:24560266:1 gene:ENSCPOG00000014597 transcript:ENSCPOT00000014742			ANNEXIN A1 ANNEXIN I LIPOCORTIN I CALPACTIN 2 CALPACTIN II
ENSCPOP00000005768	ANXA2	annexin A2 [Source:HGNC Symbol; Acc:537]	2	157; 227	157; 227	Cytoplasm		GO:0005737	99 kDa	1	1	3	0	0	0	0	0	0	0	0	0	pep:novel scaffold:cavPor3:scaffold_16:18485099:18539975:1 gene:ENSCPOG00000006449 transcript:ENSCPOT00000006514			ANNEXIN A1 ANNEXIN I LIPOCORTIN I CALPACTIN 2 CALPACTIN II
ENSCPOP00000002972	ANXA5	annexin A5 [Source:HGNC Symbol; Acc:543]	2	75; 78	76; 79	Cytoplasm		GO:0005622	36 kDa	2	0	0	0	0	0	0	0	0	0	0	0	pep:novel scaffold:cavPor3:scaffold_7:3441640:3460244:-1 gene:ENSCPOG00000003289 transcript:ENSCPOT00000003332			ANNEXIN ANNEXIN ANNEXIN
ENSCPOP00000004741	ANXA6	annexin A6 [Source:HGNC Symbol; Acc:544]	3	63; 370; 620	63; 370; 620	Cytoplasm		GO:0048471	33 kDa	0	0	0	2	1	5	9	7	6	11	4	11	pep:novel scaffold:cavPor3:scaffold_36:9147038:9150518:-1 gene:ENSCPOG00000005275 transcript:ENSCPOT00000005332			ANNEXIN A6 ANNEXIN 6 ANNEXIN VI
ENSCPOP00000017860	APOA1BP	apolipoprotein A-I binding protein [Source:HGNC Symbol; Acc:18453]	1	84	144	Mitochondrion	Apoptosis & Misc	GO:0005739	25 kDa	0	0	1	0	0	0	0	0	0	0	0	0	pep:novel scaffold:cavPor3:scaffold_10:17131108:17133201:1 gene:ENSCPOG00000024878 transcript:ENSCPOT00000027660			YJEF N TERMINAL DOMAIN CONTAINING
ENSCPOP00000012216	AIFM1	apoptosis-inducing factor, mitochondrion-associated, 1 [Source:HGNC Symbol; Acc:8768]	1	245	244	Mitochondrion	Apoptosis & Misc	GO:0005634	67 kDa	0	0	0	0	0	0	0	0	1	0	0	0	pep:novel scaffold:cavPor3:scaffold_145:455930:492653:1 gene:ENSCPOG00000013569 transcript:ENSCPOT00000013704			APOPTOSIS INDUCING FACTOR 1 MITOCHONDRIAL PRECURSOR EC 1 PROGRAMMED CELL DEATH 8
ENSCPOP00000016071	ATP5B	ATP synthase subunit beta (EC 3.6.3.14) (Fragment). [Source:UniProtB/TrEMBL; Acc:Q0QEP1]	7	124; 133; 261; 266; 482; 487; 524	124; 133; 259; 264; 480; 485; 522	Mitochondrion	Oxidative Phosphorylation	GO:0016021	57 kDa	1	1	1	4	3	2	8	7	7	4	4	6	pep:nown scaffold:cavPor3:scaffold_9:41594606:41602141:1 gene:ENSCPOG00000023092 transcript:ENSCPOT00000021512			ATP SYNTHASE SUBUNIT BETA MITOCHONDRIAL PRECURSOR EC_3.6.3.14
ENSCPOP00000000631	ATP5O	ATP SYNTHASE SUBUNIT O MITOCHONDRIAL PRECURSOR OLIGOMYCIN SENSITIVITY CONFERRAL OSCP	6	54; 60; 70; 73; 176; 192	54; 60; 70; 73; 176; 192	Mitochondrion	Oxidative Phosphorylation		23 kDa	0	0	0	5	3	5	6	6	6	7	6	6	pep:novel scaffold:cavPor3:scaffold_146:2060215:2070177:1 gene:ENSCPOG00000000710 transcript:ENSCPOT00000000715			ATP SYNTHASE SUBUNIT O MITOCHONDRIAL PRECURSOR OLIGOMYCIN SENSITIVITY CONFERRAL OSCP
ENSCPOP00000011443	ATP5A1	ATP synthase, H+ transporting, mitochondrial F1 complex, alpha subunit 1, cardiac muscle [Source:HGNC Symbol; Acc:823]	12	120; 158; 236; 237; 238; 258; 424; 495; 503; 528; 536; 538	123; 161; 239; 240; 241; 261; 427; 498; 506; 531; 539; 541	Mitochondrion	Oxidative Phosphorylation	GO:0005739	60 kDa	2	1	1	3	5	5	9	8	8	6	3	6	pep:novel scaffold:cavPor3:scaffold_14:19065414:19075174:1 gene:ENSCPOG00000012719 transcript:ENSCPOT00000012841			ATP SYNTHASE SUBUNIT ALPHA MITOCHONDRIAL PRECURSOR
ENSCPOP00000020666	ATP5D	ATP synthase, H+ transporting, mitochondrial F1 complex, delta subunit [Source:HGNC Symbol; Acc:837]	2	136; 165	136; 165	Mitochondrion	Oxidative Phosphorylation	GO:0005753	18 kDa	0	0	0	0	0	1	2	1	1	2	1	2	pep:novel scaffold:cavPor3:scaffold_320:107532:109518:1 gene:ENSCPOG00000020167 transcript:ENSCPOT00000024641			ATP SYNTHASE SUBUNIT DELTA MITOCHONDRIAL PRECURSOR F ATPASE DELTA SUBUNIT
ENSCPOP00000011149	ATP5EP2	ATP synthase, H+ transporting, mitochondrial F1 complex, epsilon subunit pseudogene 2 [Source:HGNC Symbol; Acc:34026]	2	21; 28	21; 28	Mitochondrion	Oxidative Phosphorylation	GO:0005739	6 kDa	0	0	0	0	0	0	2	0	2	2	0	0	pep:novel scaffold:cavPor3:scaffold_156:1298272:1299767:-1 gene:ENSCPOG00000012392 transcript:ENSCPOT00000012510			UNNOWN
ENSCPOP00000009450	ATP5C1	ATP synthase, H+ transporting, mitochondrial F1 complex, gamma polypeptide 1 [Source:HGNC Symbol; Acc:833]	11	20; 30; 36; 45; 60; 64; 69; 70; 71; 96; 135	39; 49; 55; 64; 79; 83; 88; 89; 90; 115; 154	Mitochondrion	Oxidative Phosphorylation	GO:0005739	31 kDa	0	0	0	2	3	3	5	5	8	5	3	5	pep:novel scaffold:cavPor3:scaffold_16:15526444:15534756:-1 gene:ENSCPOG00000010523 transcript:ENSCPOT00000010618			ATP SYNTHASE SUBUNIT GAMMA MITOCHONDRIAL PRECURSOR F ATPASE GAMMA SUBUNIT
ENSCPOP00000012673	ATP5F1	ATP synthase, H+ transporting, mitochondrial Fo complex, subunit B1 [Source:HGNC Symbol; Acc:840]	8	144; 154; 162; 191; 221; 233; 238; 244	---; 154; 162; 191; 221; 233; 238; 244	Mitochondrion	Oxidative Phosphorylation	GO:0005753	29 kDa	0	0	0	1	0	1	5	6	5	7	5	8	pep:novel scaffold:cavPor3:scaffold_2:35863251:35875058:1 gene:ENSCPOG00000014070 transcript:ENSCPOT00000014212			ATP SYNTHASE SUBUNIT B MITOCHONDRIAL PRECURSOR ATPASE SUBUNIT B
ENSCPOP00000003628	ATP5H	ATP synthase, H+ transporting, mitochondrial Fo complex, subunit d [Source:HGNC Symbol; Acc:845]	13	43; 53; 58; 67; 68; 73; 80; 90; 94; 104; 112; 143; 144	"---; 58; 63; 72; 73; 78; 85; 95; 99; 109; 117; 148; 149;	Mitochondrion	Oxidative Phosphorylation	GO:0005743	18 kDa	3	1	0	4	4	4	9	10	9	12	13	18	pep:novel scaffold:cavPor3:scaffold_76:181419:184289:1 gene:ENSCPOG00000004022 transcript:ENSCPOT00000004066			ATP SYNTHASE SUBUNIT D MITOCHONDRIAL ATPASE SUBUNIT D
ENSCPOP00000004235	ATP5J	ATP synthase, H+ transporting, mitochondrial Fo complex, subunit F6 [Source:HGNC Symbol; Acc:847]	5	41; 46; 94; 99; 105	41; 46; 94; 99; 105	Mitochondrion	Oxidative Phosphorylation	GO:0005739	15 kDa	0	1	3	0	2	0	3	2	2	4	3	6	pep:novel scaffold:cavPor3:scaffold_193:313917:314517:-1 gene:ENSCPOG00000004707 transcript:ENSCPOT00000004757			ATP SYNTHASE COUPLING FACTOR 6 MITOCHONDRIAL PRECURSOR ATPASE SUBUNIT F6
ENSCPOP00000013208	ATPIF1	ATPase inhibitory factor 1 [Source:HGNC Symbol; Acc:871]	1	83	83	Mitochondrion	Oxidative Phosphorylation	GO:0009986	12 kDa	0	0	0	0	0	0	0	0	0	0	0	2	pep:novel scaffold:cavPor3:scaffold_25:8153707:8155747:-1 gene:ENSCPOG00000014658 transcript:ENSCPOT00000014803			UNNOWN
ENSCPOP00000002487	ATP2A2	ATPase, Ca++ transporting, cardiac muscle, slow twitch 2 [Source:HGNC Symbol; Acc:812]	3	464; 510; 533	464; 510; 533	Membrane Assoc. & Misc.		GO:0005792	115 kDa	0	0	0	1	0	2	1	0	0	0	0	0	pep:novel scaffold:cavPor3:scaffold_115:1976162:2030121:1 gene:ENSCPOG00000002739 transcript:ENSCPOT00000002774			SARCOPLASMIC/ENDOPLASMIC RETICULUM CALCIUM ATPASE SR CA 2+ ATPASE EC_3.6.3.8 CALCIUM PUMP CALCIUM TRANSPORTING ATPASE SARCOPLASMIC RETICULUM TYPE TWITCH SELETAL MUSCLE ENDOPLASMIC RETICULUM CLASS 1/2 CA 2+ ATPASE
ENSCPOP00000009610	ABCB7	ATP-binding cassette, sub-family B (MDR/TAP), member 7 [Source:HGNC Symbol; Acc:48]	2	134; 268	---; 216	Mitochondrion	Transport	GO:0005739	74 kDa	0	0	0	0	0	0	2	0	0	1	0	0	pep:novel scaffold:cavPor3:scaffold_26:21551142:21625367:1 gene:ENSCPOG00000010708 transcript:ENSCPOT00000010805			IRON SULFUR CLUSTERS TRANSPORTER ATM1 MITOCHONDRIAL PRECURSOR
ENSCPOP00000000963	AUH	AU RNA binding protein/enoyl-CoA hydratase [Source:HGNC Symbol; Acc:890]	1	21	100	Mitochondrion	Protein Synthesis, Metabolism & Folding	GO:0005739	28 kDa	0	0	0	0	0	0	0	1	0	0	0	0	pep:novel scaffold:cavPor3:scaffold_47:14288037:14408362:1 gene:ENSCPOG00000001066 transcript:ENSCPOT00000001077			METHYLGLUTACONYL COA HYDRATASE MITOCHONDRIAL PRECURSOR EC_4.2.1.18 AU SPECIFIC RNA BINDING ENOYL COA HYDRATASE AU BINDING COA HYDRATASE
ENSCPOP00000001880	ACTC1	Beta actin (Fragment). Source: UniProtB/TrEMBL Q9QZ97 100% identity with mouse ACTC1	5	52; 63; 317; 328; 330	52; 63; 317; 328; 330	Sarcomere	Thin Filament		42 kDa	3	2	3	1	0	0	1	1	2	0	4	3	pep:nown scaffold:cavPor3:scaffold_10:20672255:20676454:-1 gene:ENSCPOG00000002077 transcript:ENSCPOT00000002104	TRUE	acetylated peptides shared in multiple isoforms e.g. ENSCPOP000000010419, …9329, …10883, …12125; i.e. with cytoseletal isoforms	ACTIN
ENSCPOP00000006354	MYH7	Beta-myosin-heavy-chain (Fragment). [Source:UniProtB/TrEMBL; Acc:Q9Z0X8]	49	43; 67; 246; 278; 383; 405; 413; 434; 565; 657; 744; 757; 853; 860; 865; 876; 939; 940; 951; 968; 1016; 1026; 1042; 1106; 1173; 1247; 1279; 1294; 1316; 1324; 1354; 1374; 1444; 1445; 1451; 1459; 1499; 1528; 1531; 1569; 1579; 1587; 1641; 1727; 1791; 1814; 1831; 1870; 1930	43; 67; 246; 278; 383; 405; 413; ---; 565; 657; 744; 757; 855; 865; 876; 939; 940; 951; 960; 968; 1016; 1026; 1042; 1106; 1173; 1247; 1279; 1294; 1316; 1324; 1354; 1374; 1444; 1445; 1457; 1459; 1499; 1528; 1531; 1569; 1579; 1587; 1641; 1727; 1791; 1816; 1831; 1870; 1930	Sarcomere	Thick Filament	GO:0016459	37 kDa	2	1	1	0	0	0	0	0	0	0	0	0	pep:novel scaffold:cavPor3:scaffold_28:15032532:15047155:-1 gene:ENSCPOG00000007138 transcript:ENSCPOT00000007209	TRUE	Shares 2 non-acetylated peptides with ENSCPOP00000010729	MYOSIN MYOSIN HEAVY CHAIN MYOSIN HEAVY CHAIN MUSCLE
ENSCPOP00000002161	BPHL	biphenyl hydrolase-lie (serine hydrolase) [Source:HGNC Symbol; Acc:1094]	1	134	126	Mitochondrion	Apoptosis & Misc	GO:0005739	33 kDa	0	0	0	0	0	0	0	0	0	1	0	0	pep:novel scaffold:cavPor3:scaffold_38:420506:451489:1 gene:ENSCPOG00000002377 transcript:ENSCPOT00000002410			VALACYCLOVIR HYDROLASE PRECURSOR VALACYCLOVIRASE VACVASE EC_3.1.-.- BIPHENYL HYDROLASE
ENSCPOP00000000897	BCD	branched chain ketoacid dehydrogenase kinase [Source:HGNC Symbol; Acc:16902]	2	184; 192	184; 192	Mitochondrion	Protein Synthesis, Metabolism & Folding	GO:0005739	47 kDa	0	0	0	0	0	0	0	0	0	0	0	2	pep:novel scaffold:cavPor3:scaffold_4:45993765:45996883:1 gene:ENSCPOG00000000998 transcript:ENSCPOT00000001006			[3 METHYL 2 OXOBUTANOATE DEHYDROGENASE [LIPOAMIDE]] kinase MITOCHONDRIAL PRECURSOR EC_2.7.11.4 BRANCHED CHAIN ALPHA ketoACID DEHYDROGENASE kinase BCD kinase BCDHIN
ENSCPOP00000011583	CA1	carbonic anhydrase I [Source:HGNC Symbol; Acc:1368]	1	155	157	Cytoplasm	Signaling, Redox & Misc		28 kDa	0	1	0	0	0	0	0	0	0	0	0	0	pep:novel scaffold:cavPor3:scaffold_0:28786102:28794798:1 gene:ENSCPOG00000012870 transcript:ENSCPOT00000012995			CARBONIC ANHYDRASE EC_4.2.1.1 CARBONIC ANHYDRASE CA CARBONATE DEHYDRATASE
ENSCPOP00000017061	CRAT	carnitine O-acetyltransferase [Source:HGNC Symbol; Acc:2342]	5	268; 281; 390; 480; 609	268; 281; 390; 480; 609	Mitochondrion	Fatty Acid Metabolism	GO:0005739	71 kDa	1	1	0	0	0	2	4	3	1	4	0	3	pep:novel scaffold:cavPor3:scaffold_27:3315212:3324490:1 gene:ENSCPOG00000026132 transcript:ENSCPOT00000021870			CHOLINE O ACETYLTRANSFERASE CHOLINE ACETYLASE CHOACTASE CHAT EC_2.3.1.6
ENSCPOP00000010349	CPT2	carnitine palmitoyltransferase 2 [Source:HGNC Symbol; Acc:2330]	9	62; 232; 298; 411; 417; 446; 503; 507; 537	69; 239; 305; ---; 424; 453; ---; 510; 544;	Mitochondrion	Fatty Acid Metabolism	GO:0005739	73 kDa	0	0	0	0	0	0	3	7	7	2	3	4	pep:novel scaffold:cavPor3:scaffold_321:65916:79243:-1 gene:ENSCPOG00000011506 transcript:ENSCPOT00000011614			CARNITINE O PALMITOYLTRANSFERASE 2 MITOCHONDRIAL PRECURSOR EC_2.3.1.21 CARNITINE PALMITOYLTRANSFERASE II CPT II
ENSCPOP00000011674	CISD1	CDGSH iron sulfur domain 1 [Source:HGNC Symbol; Acc:30880]	4	55; 68; 104; 106	55; 68; 104; 106	Mitochondrion	Oxidative Phosphorylation	GO:0005739	12 kDa	0	0	0	0	0	0	1	1	2	3	2	4	pep:novel scaffold:cavPor3:scaffold_80:3647536:3647862:-1 gene:ENSCPOG00000012967 transcript:ENSCPOT00000013092			CDGSH IRON SULFUR DOMAIN CONTAINING 1 MITONEET
ENSCPOP00000008445	CCT8	chaperonin containing TCP1, subunit 8 (theta) [Source:HGNC Symbol; Acc:1623]	1	402	400	Nucleus	Chaperone & Structural	GO:0005634	60 kDa	1	0	1	1	0	0	0	0	0	0	0	0	pep:novel scaffold:cavPor3:scaffold_52:4653664:4667139:1 gene:ENSCPOG00000009404 transcript:ENSCPOT00000009489			T COMPLEX 1 SUBUNIT THETA TCP 1 THETA CCT THETA
ENSCPOP00000003618	CLIC4	chloride intracellular channel 4 [Source:HGNC Symbol; Acc:13518]	1	130	130	Mitochondrion	Transport	GO:0005739	29 kDa	1	1	1	0	0	0	0	0	0	0	0	0	pep:novel scaffold:cavPor3:scaffold_25:11029309:11082036:-1 gene:ENSCPOG00000004010 transcript:ENSCPOT00000004054			CHLORIDE INTRACELLULAR CHANNEL
ENSCPOP00000002485	CLYBL	citrate lyase beta lie [Source:HGNC Symbol; Acc:18355]	3	56; 57; 149	57; 58; 150	Mitochondrion	Krebs Cycle	GO:0005739	37 kDa	3	2	2	0	0	0	2	2	2	1	2	2	pep:novel scaffold:cavPor3:scaffold_5:24468474:24685345:-1 gene:ENSCPOG00000002735 transcript:ENSCPOT00000002770			CITRATE LYASE SUBUNIT BETA PROTEIN MITOCHONDRIAL PRECURSOR CITRATE LYASE BETA EC_4.1.-.-
ENSCPOP00000013435	CS	Citrate synthase (Fragment). [Source:UniProtB/TrEMBL; Acc:Q0QEL6]	5	103; 321; 327; 375; 382	103; 321; 327; 375; 382	Mitochondrion	Krebs Cycle	GO:0005759	52 kDa	4	4	5	0	1	2	4	6	4	4	2	7	pep:nown scaffold:cavPor3:scaffold_9:41905023:41916201:1 gene:ENSCPOG00000014910 transcript:ENSCPOT00000015055			CITRATE SYNTHASE MITOCHONDRIAL PRECURSOR EC_2.3.3.1
ENSCPOP00000008626	COQ6	coenzyme Q6 homolog, monooxygenase (S. cerevisiae) [Source:HGNC Symbol; Acc:20233]	1	165	---	Mitochondrion	Oxidative Phosphorylation	GO:0005739	50 kDa	0	0	0	0	0	0	0	0	1	0	0	0	pep:novel scaffold:cavPor3:scaffold_20:18153323:18165051:1 gene:ENSCPOG00000009610 transcript:ENSCPOT00000009697			UBIQUINONE BIOSYNTHESIS MONOOXYGENASE EC_1.14.13.-
ENSCPOP00000004099	COQ9	coenzyme Q9 homolog (S. cerevisiae) [Source:HGNC Symbol; Acc:25302]	1	71	70	Mitochondrion	Oxidative Phosphorylation	GO:0005739	30 kDa	0	0	0	0	0	0	0	0	0	0	0	1	pep:novel scaffold:cavPor3:scaffold_66:3157470:3175899:1 gene:ENSCPOG00000004556 transcript:ENSCPOT00000004605			UBIQUINONE BIOSYNTHESIS COQ9 MITOCHONDRIAL PRECURSOR
ENSCPOP00000003559	CMT2	creatine kinase, mitochondrial 2 (sarcomeric) [Source:HGNC Symbol; Acc:1996]	5	137; 230; 276; 344; 403	---; 230; 276; 344; 403	Mitochondrion	Apoptosis & Misc	GO:0005739	47 kDa	0	0	0	1	1	2	2	2	1	2	2	1	pep:novel scaffold:cavPor3:scaffold_1:22436542:22446404:-1 gene:ENSCPOG00000003941 transcript:ENSCPOT00000003985	TRUE	1 acetylated peptide shared with ENSCPOP00000001623 and …16471	CREATINE kinase TYPE EC_2.7.3.2 CREATINE kinase C
ENSCPOP00000016471	CM	creatine kinase, muscle [Source:HGNC Symbol; Acc:1994]	15	15; 32; 41; 101; 107; 116; 242; 247; 259; 265; 266; 298; 304; 307; 369	41; 101; 107; 116; 15; 242; 247; 259; 265; 266; 298; 304; 307; 32; 369	Cytoplasm	Signaling, Redox & Misc		43 kDa	11	11	15	1	1	1	0	0	0	2	1	2	pep:novel scaffold:cavPor3:scaffold_80:5809338:5818944:-1 gene:ENSCPOG00000019609 transcript:ENSCPOT00000025445	TRUE	many uniques acetylated peptides; 1 acetylated peptide shared with ENSCPOP00000001623 and …3559	CREATINE kinase TYPE EC_2.7.3.2 CREATINE kinase C
ENSCPOP00000004489	CREBBP	CREB binding protein [Source:HGNC Symbol; Acc:2348]	6	994; 1196; 1551; 1552; 1555; 1557	1014; 1216; 1591; 1592; 1595; 1597	Nucleus	Transcr.	GO:0016604	34 kDa	0	0	0	0	0	1	1	1	1	0	0	0	pep:novel scaffold:cavPor3:scaffold_61:10015177:10017367:-1 gene:ENSCPOG00000005008 transcript:ENSCPOT00000005062			CREB BINDING EC_2.3.1.48
ENSCPOP00000008701	CCBL2	cysteine conjugate-beta lyase 2 [Source:HGNC Symbol; Acc:33238]	3	108; 116; 434	108; 116; 434	Mitochondrion	Protein Synthesis, Metabolism & Folding	GO:0005739	51 kDa	0	1	0	0	0	0	3	0	0	0	0	0	pep:novel scaffold:cavPor3:scaffold_2:47513596:47554798:1 gene:ENSCPOG00000009695 transcript:ENSCPOT00000009782			YNURENINE OXOGLUTARATE TRANSAMINASE 3 EC_2.6.1.7 YNURENINE OXOGLUTARATE TRANSAMINASE III YNURENINE AMINOTRANSFERASE III ATIII CYSTEINE S CONJUGATE BETA LYASE 2 EC_4.4.1.- 13 YNURENINE GLYOXYLATE TRANSAMINASE EC_2.6.-.- 1 63
ENSCPOP00000018791	COX4I1	cytochrome c oxidase subunit IV isoform 1 [Source:HGNC Symbol; Acc:2265]	6	63; 65; 67; 78; 85; 87	63; 65; 67; 78; 85; 87	Mitochondrion	Oxidative Phosphorylation	GO:0005634	20 kDa	0	0	0	0	0	2	4	3	3	4	4	6	pep:novel scaffold:cavPor3:scaffold_309:283778:287163:1 gene:ENSCPOG00000022243 transcript:ENSCPOT00000019606			CYTOCHROME C OXIDASE SUBUNIT 4 1 MITOCHONDRIAL CYTOCHROME C OXIDASE SUBUNIT IV 1 COX IV 1 CYTOCHROME C OXIDASE POLYPEPTIDE IV
ENSCPOP00000019902	COX5A	cytochrome c oxidase subunit Va [Source:HGNC Symbol; Acc:2267]	3	72; 87; 113	72; 87; 113	Mitochondrion	Oxidative Phosphorylation	GO:0005739	17 kDa	0	0	0	0	0	0	2	0	1	2	0	3	pep:novel scaffold:cavPor3:scaffold_98:4333064:4340592:1 gene:ENSCPOG00000024832 transcript:ENSCPOT00000028027			CYTOCHROME C OXIDASE SUBUNIT 5A MITOCHONDRIAL PRECURSOR CYTOCHROME C OXIDASE POLYPEPTIDE VA
ENSCPOP00000002482	COX5B	cytochrome c oxidase subunit Vb [Source:HGNC Symbol; Acc:2269]	3	57; 74; 121	57; ---; 121	Mitochondrion	Oxidative Phosphorylation		14 kDa	0	0	0	0	0	0	4	2	2	3	2	4	pep:novel scaffold:cavPor3:scaffold_24:2027391:2029063:-1 gene:ENSCPOG00000002733 transcript:ENSCPOT00000002767			CYTOCHROME C OXIDASE SUBUNIT 5B MITOCHONDRIAL PRECURSOR CYTOCHROME C OXIDASE POLYPEPTIDE VB
ENSCPOP00000013476	COX7A2L	cytochrome c oxidase subunit VIIa polypeptide 2 lie [Source:HGNC Symbol; Acc:2289]	4	27; 51; 65; 69	27; ---; 65; 69	Mitochondrion	Oxidative Phosphorylation	GO:0005739	13 kDa	0	0	0	0	0	0	2	2	3	1	0	0	pep:novel scaffold:cavPor3:scaffold_18:26769680:26778031:-1 gene:ENSCPOG00000014953 transcript:ENSCPOT00000015099			CYTOCHROME C OXIDASE SUBUNIT 7A RELATED PROTEIN MITOCHONDRIAL PRECURSOR CYTOCHROME C OXIDASE SUBUNIT VIIA RELATED
ENSCPOP00000011918	CYC1	cytochrome c-1 [Source:HGNC Symbol; Acc:2579]	1	283	325	Mitochondrion	Oxidative Phosphorylation	GO:0005739	31 kDa	0	0	0	0	0	0	0	1	2	0	0	0	pep:novel scaffold:cavPor3:scaffold_95:3236041:3237466:1 gene:ENSCPOG00000013237 transcript:ENSCPOT00000013365			CYTOCHROME C1 HEME PROTEIN MITOCHONDRIAL PRECURSOR UBIQUINOL CYTOCHROME C REDUCTASE COMPLEX CYTOCHROME C1 SUBUNIT CYTOCHROME C 1 CYTOCHROME B C1 COMPLEX SUBUNIT 4 COMPLEX III SUBUNIT 4 COMPLEX III SUBUNIT IV
ENSCPOP00000002239	DES	desmin [Source:HGNC Symbol; Acc:2770]	1	242	240	Cytoskeleton	Cytoskeleton	GO:0045202	54 kDa	0	0	0	0	0	0	0	0	0	0	0	1	pep:novel scaffold:cavPor3:scaffold_89:5793790:5800034:-1 gene:ENSCPOG00000002458 transcript:ENSCPOT00000002491	TRUE	1 unique actylated peptide , multiple non-acetylated shared peptides	AMBIGUOUS
ENSCPOP00000000366	DBI	diazepam binding inhibitor (GABA receptor modulator, acyl-CoA binding protein) [Source:HGNC Symbol; Acc:2690]	5	11; 14; 48; 50; 52	.---; ---; 17; 53; 55	Mitochondrion	Transport	GO:0005739	10 kDa	3	2	3	0	0	0	0	0	0	0	0	0	pep:novel scaffold:cavPor3:scaffold_3:60137952:60141698:1 gene:ENSCPOG00000000415 transcript:ENSCPOT00000000418			UNNOWN
ENSCPOP00000004776	DLD	dihydrolipoamide dehydrogenase [Source:HGNC Symbol; Acc:2898]	15	66; 104; 122; 132; 143; 146; 155; 166; 267; 271; 273; 277; 346; 410; 420	104; 122; 132; 143; 146; 155; 166; 267; 271; 273; 277; 346; 410; 420; 66	Mitochondrion	Krebs Cycle	GO:0005739	52 kDa	1	0	0	2	2	2	10	6	6	3	5	3	pep:novel scaffold:cavPor3:scaffold_18:8160066:8185370:1 gene:ENSCPOG00000005418 transcript:ENSCPOT00000005476			DIHYDROLIPOYL DEHYDROGENASE MITOCHONDRIAL PRECURSOR EC_1.8.1.4 DIHYDROLIPOAMIDE DEHYDROGENASE
ENSCPOP00000010543	DLAT	dihydrolipoamide S-acetyltransferase [Source:HGNC Symbol; Acc:2896]	3	454; 458; 633	462; 466; 641	Mitochondrion	Krebs Cycle	GO:0005739	67 kDa	0	2	2	2	2	2	3	2	2	2	2	2	pep:novel scaffold:cavPor3:scaffold_19:35747084:35775346:-1 gene:ENSCPOG00000011723 transcript:ENSCPOT00000011837			DIHYDROLIPOYLLYSINE RESIDUE ACETYLTRANSFERASE COMPONENT OF PYRUVATE DEHYDROGENASE COMPLEX MITOCHONDRIAL PRECURSOR EC_2.3.1.12 DIHYDROLIPOAMIDE ACETYLTRANSFERASE COMPONENT OF PYRUVATE DEHYDROGENASE COMPLEX PYRUVATE DEHYDROGENASE COMPLEX COMPONENT E2 PDC E2
ENSCPOP00000008361	DLST	dihydrolipoamide S-succinyltransferase (E2 component of 2-oxo-glutarate complex) [Source:HGNC Symbol; Acc:2911]	5	268; 273; 274; 278; 308	267; 272; 273; 277; 307	Mitochondrion	Krebs Cycle	GO:0005739	49 kDa	5	4	4	4	4	4	5	3	4	5	3	3	pep:novel scaffold:cavPor3:scaffold_20:18933903:18953714:1 gene:ENSCPOG00000009316 transcript:ENSCPOT00000009401			DIHYDROLIPOYLLYSINE RESIDUE SUCCINYLTRANSFERASE COMPONENT OF 2 OXOGLUTARATE DEHYDROGENASE COMPLEX MITOCHONDRIAL PRECURSOR EC_2.3.1.61 DIHYDROLIPOAMIDE SUCCINYLTRANSFERASE COMPONENT OF 2 OXOGLUTARATE DEHYDROGENASE COMPLEX 2 OXOGLUTARATE DEHYDROGENASE COMPL
ENSCPOP00000001864	DCI	dodecenoyl-CoA isomerase [Source:HGNC Symbol; Acc:2703]	2	92; 271	89; ---	Mitochondrion	Fatty Acid Metabolism	GO:0005739	34 kDa	0	0	0	0	0	0	2	2	2	0	3	2	pep:novel scaffold:cavPor3:scaffold_4:22325663:22342496:-1 gene:ENSCPOG00000002059 transcript:ENSCPOT00000002086			3 2 TRANS ENOYL COA ISOMERASE MITOCHONDRIAL PRECURSOR EC_5.3.3.8 DODECENOYL COA ISOMERASE DELTA 3 DELTA 2 ENOYL COA ISOMERASE D3 D2 ENOYL COA ISOMERASE
ENSCPOP00000004894	EP300	E1A binding protein p300 [Source:HGNC Symbol; Acc:3373]	9	1521; 1525; 1528; 1529; 1530; 1533; 1534; 1537; 1539	1542; 1546; 1549; 1550; 1551; 1554; 1555; 1558; 1560	Nucleus	Transcr.	GO:0005667	79 kDa	0	0	0	1	0	2	3	3	2	3	2	3	pep:novel scaffold:cavPor3:scaffold_13:39857037:39884518:-1 gene:ENSCPOG00000005555 transcript:ENSCPOT00000005614			CREB BINDING EC_2.3.1.48
ENSCPOP00000018962	FABP5	E-FABP. [Source:UniProtB/TrEMBL; Acc:A9QUC5]	2	17; 40	17; 40	Cytoplasm			15 kDa	1	1	2	0	0	0	0	0	0	0	0	0	pep:nown scaffold:cavPor3:scaffold_0:32608413:32612491:-1 gene:ENSCPOG00000025732 transcript:ENSCPOT00000024303			FATTY ACID BINDING PROTEIN EPIDERMAL EPIDERMAL TYPE FATTY ACID BINDING E FABP FATTY ACID BINDING 5 PSORIASIS ASSOCIATED FATTY ACID BINDING HOMOLOG PA FABP
ENSCPOP00000005574	ETFA	electron-transfer-flavoprotein, alpha polypeptide [Source:HGNC Symbol; Acc:3481]	2	49; 56	62; 69	Mitochondrion	Oxidative Phosphorylation	GO:0005739	21 kDa	0	0	0	0	1	0	0	0	0	0	0	0	pep:novel scaffold:cavPor3:scaffold_13:25062675:25097078:-1 gene:ENSCPOG00000006368 transcript:ENSCPOT00000006433			ELECTRON TRANSFER FLAVOPROTEIN SUBUNIT ALPHA MITOCHONDRIAL PRECURSOR ALPHA ETF
ENSCPOP00000007149	ETFB	electron-transfer-flavoprotein, beta polypeptide [Source:HGNC Symbol; Acc:3482]	1	110	110	Mitochondrion	Oxidative Phosphorylation	GO:0005739	93 kDa	2	1	2	0	0	1	0	0	0	0	0	0	pep:novel scaffold:cavPor3:scaffold_9:51686367:51727337:-1 gene:ENSCPOG00000008351 transcript:ENSCPOT00000008426	TRUE	1 non-acetylated peptide shared with ENSCPOP00000001292; 2 shared with ENSCPOP00000000281	ELECTRON TRANSFER FLAVOPROTEIN SUBUNIT BETA BETA ETF
ENSCPOP00000004119	ETFDH	electron-transferring-flavoprotein dehydrogenase [Source:HGNC Symbol; Acc:3483]	5	259; 284; 285; 357; 510	259; 284; ---, 357; 509	Mitochondrion	Oxidative Phosphorylation	GO:0005739	13 kDa	0	0	0	0	0	0	3	0	0	4	2	3	pep:novel scaffold:cavPor3:scaffold_52:7715794:7721305:1 gene:ENSCPOG00000004703 transcript:ENSCPOT00000004753			ELECTRON TRANSFER FLAVOPROTEIN UBIQUINONE OXIDOREDUCTASE MITOCHONDRIAL PRECURSOR ETF UBIQUINONE OXIDOREDUCTASE ETF QO EC_1.5.5.1 ELECTRON TRANSFERRING FLAVOPROTEIN DEHYDROGENASE ETF DEHYDROGENASE
ENSCPOP00000003669	EEF1A1	ELONGATION FACTOR 1 ALPHA EF 1 ALPHA EUARYOTIC ELONGATION FACTOR 1 A EEF1A	1	179	179	Cytoplasm	Translation and Protein Folding		71 kDa	3	2	2	0	0	0	0	0	0	0	0	0	pep:novel scaffold:cavPor3:scaffold_19:25400692:25403895:1 gene:ENSCPOG00000004169 transcript:ENSCPOT00000004214	TRUE	1 uniqe acetylated peptide ; 1 acetylated peptide shared with ENSCPOP00000020490	ELONGATION FACTOR 1 ALPHA EF 1 ALPHA EUARYOTIC ELONGATION FACTOR 1 A EEF1A
ENSCPOP00000020424	EEF1G	ELONGATION FACTOR 1 GAMMA EF 1 GAMMA EEF 1B GAMMA	1	434	434	Cytoplasm	Translation and Protein Folding		50 kDa	1	0	1	0	0	0	0	0	0	0	0	0	pep:novel scaffold:cavPor3:scaffold_44:15161369:15170025:1 gene:ENSCPOG00000025703 transcript:ENSCPOT00000028229			ELONGATION FACTOR 1 GAMMA EF 1 GAMMA EEF 1B GAMMA
ENSCPOP00000005241	ENO1	Enolase (EC 4.2.1.11). [Source:UniProtB/TrEMBL; Acc:A9YWS9]	1	89	89	Cytoplasm	Glucose Metabolism	GO:0000015	83 kDa	0	0	0	6	3	8	22	19	16	14	7	15	pep:novel scaffold:cavPor3:scaffold_18:8112613:8154587:-1 gene:ENSCPOG00000005945 transcript:ENSCPOT00000006008			ENOLASE EC_4.2.1.11 2 PHOSPHOGLYCERATE DEHYDRATASE 2 PHOSPHO D GLYCERATE HYDRO LYASE
ENSCPOP00000011828	ENO3	enolase 3 (beta, muscle) [Source:HGNC Symbol; Acc:3354]	5	80; 89; 193; 197; 275	80; 89; 193; 197; 275	Cytoplasm	Glucose Metabolism	GO:0005737	47 kDa	4	0	2	0	0	0	0	0	0	0	0	0	pep:novel scaffold:cavPor3:scaffold_61:10028635:10033077:1 gene:ENSCPOG00000013139 transcript:ENSCPOT00000013266	TRUE	Contains 4 uniqe acetylated peptides; shares non-acetylated peptides with ENSCPOP00000005241	ENOLASE EC_4.2.1.11 2 PHOSPHOGLYCERATE DEHYDRATASE 2 PHOSPHO D GLYCERATE HYDRO LYASE
ENSCPOP00000006890	ECH1	enoyl CoA hydratase 1, peroxisomal [Source:HGNC Symbol; Acc:3149]	1	206	231	Mitochondrion	Fatty Acid Metabolism	GO:0005739	557 kDa	0	0	0	0	0	1	0	0	0	1	0	0	pep:novel scaffold:cavPor3:scaffold_16:6051811:6427589:1 gene:ENSCPOG00000007936 transcript:ENSCPOT00000008011			DELTA 3 5 DELTA 2 4 DIENOYL COA ISOMERASE MITOCHONDRIAL PRECURSOR EC_5.3.3.-
ENSCPOP00000010906	ECHS1	enoyl CoA hydratase, short chain, 1, mitochondrial [Source:HGNC Symbol; Acc:3151]	1	179	204	Mitochondrion	Fatty Acid Metabolism	GO:0005739	28 kDa	0	0	0	0	0	0	1	0	0	0	0	0	pep:novel scaffold:cavPor3:scaffold_1:34736183:34743090:1 gene:ENSCPOG00000012129 transcript:ENSCPOT00000012245			ENOYL COA HYDRATASE MITOCHONDRIAL PRECURSOR EC_4.2.1.17 SHORT CHAIN ENOYL COA HYDRATASE SCEH ENOYL COA HYDRATASE 1
ENSCPOP00000002376	RT8	ERATIN TYPE II CYTOSELETAL CYTOERATIN C ERATIN TYPE II ERATIN	2	110; 187	108; 185	Cytoskeleton	Cytoskeleton		53 kDa	0	0	0	1	0	0	0	0	0	0	0	0	pep:novel scaffold:cavPor3:scaffold_9:46900000:46907434:1 gene:ENSCPOG00000002615 transcript:ENSCPOT00000002649	FALSE	1 unique acetylated peptide, 2 acetylated peptides shared with ENSCPOP00000006957	ERATIN TYPE II CYTOSELETAL CYTOERATIN C ERATIN TYPE II ERATIN
ENSCPOP00000010265	C21orf33	ES1 MITOCHONDRIAL PRECURSOR	8	105; 121; 146; 156; 169; 176; 208; 238	---; 116; 141; 151; 164; 171; 203; 233	Mitochondrion	Protein Synthesis, Metabolism & Folding	GO:0005739	29 kDa	4	3	5	0	0	0	4	5	3	3	2	4	pep:novel scaffold:cavPor3:scaffold_90:789763:796018:1 gene:ENSCPOG00000011419 transcript:ENSCPOT00000011525			ES1 MITOCHONDRIAL PRECURSOR
ENSCPOP00000018421	EEF1A2	euaryotic translation elongation factor 1 alpha 2 [Source:HGNC Symbol; Acc:3192]	1	179	179	Cytoplasm	Translation and Protein Folding		50 kDa	1	0	0	0	0	1	0	0	0	0	0	0	pep:novel scaffold:cavPor3:scaffold_119:842252:849252:1 gene:ENSCPOG00000022072 transcript:ENSCPOT00000015086	TRUE	Contains 1 unique peptide; shares many non-acetylated peptides with ENSCPOP00000003669	ELONGATION FACTOR 1 ALPHA EF 1 ALPHA EUARYOTIC ELONGATION FACTOR 1 A EEF1A
ENSCPOP00000014155	EEF2	euaryotic translation elongation factor 2 [Source:HGNC Symbol; Acc:3214]	1	271	272	Cytoplasm	Translation and Protein Folding	GO:0030529	78 kDa	0	0	1	0	0	0	0	0	0	0	0	0	pep:novel scaffold:cavPor3:scaffold_304:242571:247378:1 gene:ENSCPOG00000015697 transcript:ENSCPOT00000015852			ELONGATION FACTOR 2 EF 2
ENSCPOP00000011330 (+1)	EIF5A2	euaryotic translation initiation factor 5A2 [Source:HGNC Symbol; Acc:3301]	1	46	47	Cytoplasm	Translation and Protein Folding		17 kDa	1	1	1	0	0	0	0	0	0	0	0	0	pep:novel scaffold:cavPor3:scaffold_100:3337618:3347154:-1 gene:ENSCPOG00000012594 transcript:ENSCPOT00000012715
ENSCPOP00000011060	FABP3	fatty acid binding protein 3, muscle and heart (mammary-derived growth inhibitor) [Source:HGNC Symbol; Acc:3557]	2	38; 53	38; 54	Cytoplasm	Fatty Acid Metabolism		15 kDa	1	2	2	0	0	0	0	0	0	0	0	0	pep:novel scaffold:cavPor3:scaffold_25:5710930:5718340:1 gene:ENSCPOG00000012297 transcript:ENSCPOT00000012413			FATTY ACID BINDING PROTEIN HEART HEART TYPE FATTY ACID BINDING H FABP FATTY ACID BINDING 3
ENSCPOP00000002086	FASN	fatty acid synthase [Source:HGNC Symbol; Acc:3594]	2	70; 959	70; 957	Cytoplasm	Lipid Binding	GO:0005737	272 kDa	0	2	2	0	0	0	0	0	0	0	0	0	pep:novel scaffold:cavPor3:scaffold_76:6482886:6497275:-1 gene:ENSCPOG00000002297 transcript:ENSCPOT00000002329			FATTY ACID SYNTHASE EC_2.3.1.85 [INCLUDES [ACYL CARRIER PROTEIN] S ACETYLTRANSFERASE EC_2.3.1.- 38 ; [ACYL CARRIER PROTEIN] S MALONYLTRANSFERASE EC_2.3.-.- 1 39 ; 3 OXOACYL [ACYL CARRIER PROTEIN] SYNTHASE EC 2.3.1.41 ; 3 OXOACYL [ACYL CARRIER PROTEIN] RED
ENSCPOP00000007615	SARS2	F-box protein 17 [Source:HGNC Symbol; Acc:18754]	1	110	110	Mitochondrion	Protein Synthesis, Metabolism & Folding		27 kDa	0	0	0	0	0	0	0	0	0	2	0	1	pep:novel scaffold:cavPor3:scaffold_82:2579305:2602204:-1 gene:ENSCPOG00000008479 transcript:ENSCPOT00000008556			SERYL TRNA SYNTHETASE MITOCHONDRIAL EC_6.1.1.11 SERYL TRNA SER/SEC SYNTHETASE SERINE TRNA LIGASE SERRS
ENSCPOP00000011904	FECH	ferrochelatase [Source:HGNC Symbol; Acc:3647]	1	291	---	Mitochondrion	Apoptosis & Misc	GO:0005739	48 kDa	0	0	0	0	0	0	0	1	1	0	0	0	pep:novel scaffold:cavPor3:scaffold_14:7948343:7978673:1 gene:ENSCPOG00000013224 transcript:ENSCPOT00000013351			FERROCHELATASE MITOCHONDRIAL PRECURSOR EC_4.99.1.1 PROTOHEME FERRO LYASE HEME SYNTHASE
ENSCPOP00000010077	FETUB	fetuin B [Source:HGNC Symbol; Acc:3658]	1	130	---	Membrane Assoc. & Misc.			42 kDa	0	1	0	0	0	0	0	0	0	0	0	0	pep:novel scaffold:cavPor3:scaffold_7:51643403:51650183:1 gene:ENSCPOG00000011207 transcript:ENSCPOT00000011313			FETUIN B PRECURSOR FETUIN IRL685
ENSCPOP00000015741	FLNC	filamin C, gamma [Source:HGNC Symbol; Acc:3756]	1	735	734	Cytoskeleton	Cytoskeleton	GO:0005886	291 kDa	1	1	0	0	0	0	0	0	0	0	0	0	pep:novel scaffold:cavPor3:scaffold_11:49308715:49335199:1 gene:ENSCPOG00000001395 transcript:ENSCPOT00000001414	TRUE	1 unique acetylated peptide; 1 shared peptide with ENSCPOP00000002427 and …9454	FILAMIN FLN FILAMIN ACTIN BINDING ABP 280
ENSCPOP00000002739	FHL1	four and a half LIM domains 1 [Source:HGNC Symbol; Acc:3702]	1	289	73	Cytoplasm	Signaling, Redox & Misc		33 kDa	0	0	1	0	0	0	0	0	0	0	0	0	pep:novel scaffold:cavPor3:scaffold_79:6044181:6048145:-1 gene:ENSCPOG00000003025 transcript:ENSCPOT00000003064			FOUR AND A HALF LIM DOMAINS FHL
ENSCPOP00000004106	GBAS	glioblastoma amplified sequence [Source:HGNC Symbol; Acc:4179]	1	74	104	Mitochondrion	Apoptosis & Misc	GO:0005739	68 kDa	0	0	0	0	0	0	2	3	3	1	0	2	pep:novel scaffold:cavPor3:scaffold_7:35044434:35064153:1 gene:ENSCPOG00000004569 transcript:ENSCPOT00000004618			NIPSNAP HOMOLOG 2 NIPSNAP2 GLIOBLASTOMA AMPLIFIED SEQUENCE
ENSCPOP00000007694	GPI	glucose-6-phosphate isomerase [Source:HGNC Symbol; Acc:4458]	2	34; 366	34; 366	Cytoplasm	Glucose Metabolism		62 kDa	1	0	0	0	0	0	0	0	0	0	0	0	pep:novel scaffold:cavPor3:scaffold_70:5344135:5365200:1 gene:ENSCPOG00000008583 transcript:ENSCPOT00000008660			GLUCOSE 6 PHOSPHATE ISOMERASE GPI EC_5.3.1.9 PHOSPHOGLUCOSE ISOMERASE PGI PHOSPHOHEXOSE ISOMERASE PHI
ENSCPOP00000004647	GLUD1	GLUTAMATE DEHYDROGENASE MITOCHONDRIAL GDH EC_1.4.1.3	3	488; 512; 530	503; 527; 545	Mitochondrion	Krebs Cycle	GO:0005739	76 kDa	2	3	3	0	0	1	0	0	0	0	0	0	pep:novel scaffold:cavPor3:scaffold_81:392114:418960:1 gene:ENSCPOG00000005272 transcript:ENSCPOT00000005329			GLUTAMATE DEHYDROGENASE MITOCHONDRIAL GDH EC_1.4.1.3
ENSCPOP00000007755	GOT1	glutamic-oxaloacetic transaminase 1, soluble (aspartate aminotransferase 1) [Source:HGNC Symbol; Acc:4432]	3	290; 318; 396	---; 290; 396	Cytoplasm	Signaling, Redox & Misc	GO:0005829	46 kDa	3	2	1	0	0	0	0	0	0	0	0	0	pep:novel scaffold:cavPor3:scaffold_1:33030942:33052447:-1 gene:ENSCPOG00000008633 transcript:ENSCPOT00000008711			ASPARTATE AMINOTRANSFERASE EC_2.6.1.1 TRANSAMINASE A GLUTAMATE OXALOACETATE TRANSAMINASE 1
ENSCPOP00000008228	GOT2	glutamic-oxaloacetic transaminase 2, mitochondrial (aspartate aminotransferase 2) [Source:HGNC Symbol; Acc:4433]	19	73; 82; 90; 107; 122; 161; 187; 202; 229; 236; 298; 304; 311; 347; 365; 389; 398; 406; 432	73; 82; 90; 107; 122; 159; 185; 200; 227; 234; 296; 302; 309; 345; 363; 387; 396; 404; 430;	Mitochondrion	Krebs Cycle	GO:0005739	48 kDa	10	10	11	4	4	8	19	17	17	16	16	22	pep:novel scaffold:cavPor3:scaffold_22:23562397:23583692:1 gene:ENSCPOG00000009164 transcript:ENSCPOT00000009247			ASPARTATE AMINOTRANSFERASE EC_2.6.1.1 TRANSAMINASE A GLUTAMATE OXALOACETATE TRANSAMINASE 1
ENSCPOP00000020800	GST1	glutathione S-transferase kappa 1 [Source:HGNC Symbol; Acc:16906]	1	68	---	Mitochondrion	Redox	GO:0005739	26 kDa	0	0	0	0	0	0	0	0	0	0	0	2	pep:novel scaffold:cavPor3:scaffold_10:5237655:5241526:-1 gene:ENSCPOG00000023956 transcript:ENSCPOT00000022727			GLUTATHIONE S TRANSFERASE APPA 1 EC_2.5.1.18 GLUTATHIONE S TRANSFERASE SUBUNIT 13 GST 13 13 GST CLASS APPA GST1 1
ENSCPOP00000012797	GSTM2	glutathione S-transferase mu 2 (muscle) [Source:HGNC Symbol; Acc:4634]	1	94	94	Cytoplasm	Signaling, Redox & Misc		26 kDa	0	1	1	0	0	0	0	0	0	0	0	0	pep:novel scaffold:cavPor3:scaffold_2:33881865:33886629:1 gene:ENSCPOG00000014205 transcript:ENSCPOT00000014347	TRUE	1 unique acetylated peptide; non-acetylated peptides shared with ENSCPOP00000007027 and/or ENSCPOP00000019620	GLUTATHIONE S TRANSFERASE EC_2.5.1.18 GST CLASS MU
ENSCPOP00000017692	GAPDH	Glyceraldehyde-3-phosphate dehydrogenase (EC 1.2.1.12) (GAPDH) (Fragment). [Source:UniProtB/Swiss-Prot; Acc:P70685]	5	105; 140; 192; 257; 332	107; 194; 210; 259; 334	Cytoplasm	Glucose Metabolism	GO:0005737	36 kDa	4	1	1	1	0	0	0	0	0	0	1	0	pep:nown scaffold:cavPor3:scaffold_107:691824:695600:-1 gene:ENSCPOG00000026350 transcript:ENSCPOT00000027490			GLYCERALDEHYDE 3 PHOSPHATE DEHYDROGENASE GAPDH EC_1.2.1.12
ENSCPOP00000019510	H2AFZ	H2A histone family, member Z [Source:HGNC Symbol; Acc:4741]	4	5; 8; 12; 14	5; 8; 12; 14	Nucleus	Histones	GO:0005634	14 kDa	0	0	0	0	0	0	2	0	2	3	2	2	pep:novel scaffold:cavPor3:scaffold_143:1005745:1006131:1 gene:ENSCPOG00000003879 transcript:ENSCPOT00000003923	TRUE	Contains 2 unique overlapping peptides; shares acetylated peptide with ENSCPOP0000000687 and 2 mon-acetylated peptides with multiple genes	HISTONE H2A
ENSCPOP00000014295	HSPE1	heat shoc 10Da protein 1 (chaperonin 10) [Source:HGNC Symbol; Acc:5269]	3	70; 86; 99	70; 86; 99	Mitochondrion	Protein Synthesis, Metabolism & Folding		11 kDa	0	0	0	0	0	0	2	0	0	2	0	2	pep:novel scaffold:cavPor3:scaffold_104:3176646:3177823:-1 gene:ENSCPOG00000027474 transcript:ENSCPOT00000025701			UNCHARACTERIZED FRAGMENT
ENSCPOP00000019052	HSPB1	heat shoc 27Da protein 1 [Source:HGNC Symbol; Acc:5246]	3	118; 193; 200	123; 198; 205	Nucleus	Chaperone & Structural	GO:0005634	22 kDa	3	3	3	0	0	0	0	0	0	0	0	0	pep:novel scaffold:cavPor3:scaffold_30:1810086:1811303:1 gene:ENSCPOG00000023568 transcript:ENSCPOT00000023996			HEAT SHOC BETA 1 HSPB1 HEAT SHOC 27 DA HSP 27
ENSCPOP00000016987	HSPD1	heat shoc 60Da protein 1 (chaperonin) [Source:HGNC Symbol; Acc:5261]	17	91; 125; 130; 191; 192; 202; 249; 250; 352; 359; 364; 387; 389; 416; 417; 468; 472	91; 125; 130; 191; 192; 202; 249; 250; 352; 359; 364; 387; 389; 417; 418; 469; 473	Mitochondrion	Protein Synthesis, Metabolism & Folding	GO:0005739	60 kDa	3	2	3	0	0	0	10	8	8	3	4	6	pep:novel scaffold:cavPor3:scaffold_104:3179479:3187399:1 gene:ENSCPOG00000002588 transcript:ENSCPOT00000002622			60 DA HEAT SHOC PROTEIN MITOCHONDRIAL HEAT SHOC 60 HSP 60 HSP60.60 DA CHAPERONIN CHAPERONIN 60 CPN60
ENSCPOP00000003760	HSPA8	heat shoc 70Da protein 8 [Source:HGNC Symbol; Acc:5241]	4	56; 507; 583; 597	56; 507; 583; 597	Membrane Assoc. & Misc.		GO:0009986	80 kDa	0	0	1	0	0	0	0	0	0	0	0	0	pep:novel scaffold:cavPor3:scaffold_45:1694457:1741597:1 gene:ENSCPOG00000004192 transcript:ENSCPOT00000004237			UNNOWN
ENSCPOP00000002148	HSPA9	heat shoc 70Da protein 9 (mortalin) [Source:HGNC Symbol; Acc:5244]	10	75; 134; 137; 287; 290; 299; 344; 359; 599; 611	---; 135; 138; 288; 289; 300; 345; 600; 612; 76	Mitochondrion	Protein Synthesis, Metabolism & Folding	GO:0009986	74 kDa	5	5	7	1	0	3	6	9	8	6	6	6	pep:novel scaffold:cavPor3:scaffold_6:963339:978817:-1 gene:ENSCPOG00000002363 transcript:ENSCPOT00000002396	TRUE	1 non-acetylated peptide shared with ENSCPOP00000020490	UNNOWN
ENSCPOP00000003507	HSP90AA1	heat shoc protein 90Da alpha (cytosolic), class A member 1 [Source:HGNC Symbol; Acc:5256]	2	371; 374	407; 410	Cytoplasm	Translation and Protein Folding	GO:0005737	85 kDa	1	2	2	0	0	0	0	0	0	0	0	0	pep:novel scaffold:cavPor3:scaffold_15:30616156:30620414:-1 gene:ENSCPOG00000003887 transcript:ENSCPOT00000003931	TRUE	2 acetylated peptides shared with ENSCPOP00000001822	HEAT SHOC
ENSCPOP00000000235	HBA	Hemoglobin subunit alpha (Hemoglobin alpha chain) (Alpha-globin). [Source:UniProtB/Swiss-Prot; Acc:P01947]	6	8; 12; 17; 41; 57; 61	8; 12; 17; 41; 57; 61	Cytoplasm	Signaling, Redox & Misc	GO:0005833	15 kDa	5	3	5	0	0	0	0	0	0	0	1	1	pep:nown scaffold:cavPor3:scaffold_4:20169103:20169845:1 gene:ENSCPOG00000000267 transcript:ENSCPOT00000000270			HEMOGLOBIN SUBUNIT ALPHA HEMOGLOBIN ALPHA CHAIN ALPHA GLOBIN
ENSCPOP00000001378	HBB	Hemoglobin subunit beta (Hemoglobin beta chain) (Beta-globin). [Source:UniProtB/Swiss-Prot; Acc:P02095]	9	9; 45; 62; 67; 77; 83; 88; 96; 145	9; ---; 62; 67; ---; 83; ---; 96; 145	Cytoplasm	Signaling, Redox & Misc	GO:0005833	16 kDa	7	9	9	1	2	1	1	1	0	1	2	5	pep:nown scaffold:cavPor3:scaffold_71:5337899:5339176:1 gene:ENSCPOG00000001523 transcript:ENSCPOT00000001543			HEMOGLOBIN SUBUNIT BETA HEMOGLOBIN BETA CHAIN BETA GLOBIN
ENSCPOP00000010693	HNRNPU	heterogeneous nuclear ribonucleoprotein U (scaffold attachment factor A) [Source:HGNC Symbol; Acc:5048]	2	330; 792	352; 814	Nucleus	Transcr.	GO:0030529	88 kDa	1	0	2	2	1	2	0	0	0	0	0	0	pep:novel scaffold:cavPor3:scaffold_13:11543842:11552775:-1 gene:ENSCPOG00000011887 transcript:ENSCPOT00000012002			HETEROGENEOUS NUCLEAR RIBONUCLEOPROTEIN U SCAFFOLD ATTACHMENT FACTOR SAF
ENSCPOP00000017287	HRG	histidine-rich glycoprotein [Source:HGNC Symbol; Acc:5181]	2	44; 127	33; ---	Membrane Assoc. & Misc.			59 kDa	2	1	1	0	0	1	0	0	0	0	0	0	pep:novel scaffold:cavPor3:scaffold_7:51658761:51669793:1 gene:ENSCPOG00000025939 transcript:ENSCPOT00000020784			HISTIDINE RICH GLYCOPROTEIN HISTIDINE PROLINE RICH GLYCOPROTEIN HPRG
ENSCPOP00000020451	HIST1H2BB	histone cluster 1, H2bb [Source:HGNC Symbol; Acc:4751]	6	12; 13; 16; 17; 21; 109	12; 13; 16; 17; 21; 109;	Nucleus	Histones		14 kDa	0	0	0	0	0	0	1	0	0	2	0	2	pep:novel scaffold:cavPor3:scaffold_38:20382197:20382577:-1 gene:ENSCPOG00000027599 transcript:ENSCPOT00000024283	TRUE	Contains 2 unique acetylated peptides; shares acetylated peptides with other isoforms derived from multiple related histone genes	HISTONE H2B
ENSCPOP00000015632 (+2)	HIST1H4D	histone cluster 1, H4d [Source:HGNC Symbol; Acc:4782]	4	6; 9; 13; 17	6; 9; 13; 17	Nucleus	Histones		11 kDa	4	4	4	4	3	3	5	5	5	6	6	5	pep:novel scaffold:cavPor3:scaffold_2:10925027:10925335:1 gene:ENSCPOG00000023951 transcript:ENSCPOT00000024265
ENSCPOP00000016731	HIST2H2BF	histone cluster 2, H2bf [Source:HGNC Symbol; Acc:24700]	9	6; 12; 13; 16; 17; 21; 109; 117; 121	6; 12; ; 13; 16; 17; 21; 109; 117; 121	Nucleus	Histones		14 kDa	0	0	0	0	0	0	2	2	2	3	4	3	pep:novel scaffold:cavPor3:scaffold_2:10917407:10917787:-1 gene:ENSCPOG00000020265 transcript:ENSCPOT00000025200	TRUE	4 unique acetylated peptides; many acetylated peptides shared throughout the histone cluster	HISTONE H2B
ENSCPOP00000017464	HIST1HE1	Histone H1.4 (Histone H1b)	2	17; 46	17; 47	Nucleus	Histones		17 kDa	0	0	0	0	0	0	0	0	0	2	1	1	pep:novel scaffold:cavPor3:scaffold_38:20476612:20477174:1 gene:ENSCPOG00000020380 transcript:ENSCPOT00000027756	TRUE	2 uniqe acetylated peptides; 2 non-acetylated peptides shared with ENSCPOP00000018583 and …20422	UNNOWN
ENSCPOP00000004239	H3F3A	HISTONE H3	7	10; 15; 19; 24; 28; 37; 80	10; 15; 19; 24; 28; 37; 80	Nucleus	Histones		42 kDa	8	7	7	3	1	4	11	9	7	9	7	9	pep:novel scaffold:cavPor3:scaffold_14:15735485:15768669:1 gene:ENSCPOG00000004734 transcript:ENSCPOT00000004784			HISTONE H3
ENSCPOP00000015742	HADH	hydroxyacyl-CoA dehydrogenase [Source:HGNC Symbol; Acc:4799]	9	80; 86; 126; 127; 178; 184; 191; 211; 240	81; 87; 127; ---; 179; 185; 192; 212; 241;	Mitochondrion	Fatty Acid Metabolism	GO:0005739	34 kDa	4	2	4	5	6	3	8	6	7	5	7	9	pep:novel scaffold:cavPor3:scaffold_43:7663463:7696221:1 gene:ENSCPOG00000024229 transcript:ENSCPOT00000020193			HYDROXYACYL COENZYME A DEHYDROGENASE MITOCHONDRIAL PRECURSOR HCDH EC_1.1.1.35 SHORT CHAIN 3 HYDROXYACYL COA DEHYDROGENASE MEDIUM AND SHORT CHAIN L 3 HYDROXYACYL COENZYME A DEHYDROGENASE
ENSCPOP00000005365	HADHA	hydroxyacyl-CoA dehydrogenase/3-ketoacyl-CoA thiolase/enoyl-CoA hydratase (trifunctional protein), alpha subunit [Source:HGNC Symbol; Acc:4801]	25	46; 60; 129; 166; 230; 285; 289; 295; 303; 309; 326; 351; 353; 359; 390; 406; 411; 460; 493; 505; 540; 569; 570; 664; 728	46; 60; 129; 166; 230; 285; 289; 295; 303; 309; 326; 351; 353; 359; 390; 406; 411; 460; 493; 505; 540; 569; 570; 664; 728	Mitochondrion	Fatty Acid Metabolism	GO:0005739	30 kDa	0	0	0	0	0	0	1	0	0	1	0	1	pep:novel scaffold:cavPor3:scaffold_72:6798826:6803599:1 gene:ENSCPOG00000006141 transcript:ENSCPOT00000006205			TRIFUNCTIONAL ENZYME SUBUNIT ALPHA MITOCHONDRIAL PRECURSOR TP ALPHA 78 DA GASTRIN BINDING [INCLUDES LONG CHAIN ENOYL COA HYDRATASE EC_4.2.1.17 ; LONG CHAIN 3 HYDROXYACYL COA DEHYDROGENASE EC_1.1.1.- 211 ]
ENSCPOP00000004877	HADHB	hydroxyacyl-CoA dehydrogenase/3-ketoacyl-CoA thiolase/enoyl-CoA hydratase (trifunctional protein), beta subunit [Source:HGNC Symbol; Acc:4803]	13	73; 112; 182; 189; 191; 202; 273; 278; 294; 299; 333; 349; 475	72; 111; 159; 181; 188; 190; 272; 277; 293; 298; 332; 348; 474	Mitochondrion	Fatty Acid Metabolism	GO:0042645	259 kDa	10	9	8	1	0	6	2	2	3	5	3	9	pep:novel scaffold:cavPor3:scaffold_28:24703957:24757470:1 gene:ENSCPOG00000005438 transcript:ENSCPOT00000005496	TRUE	No issues	TRIFUNCTIONAL ENZYME SUBUNIT BETA MITOCHONDRIAL PRECURSOR TP BETA [INCLUDES 3 ketoACYL COA THIOLASE EC_2.3.1.16 ACETYL COA ACYLTRANSFERASE BETA ketoTHIOLASE ]
ENSCPOP00000002798	HSDL2	hydroxysteroid dehydrogenase lie 2 [Source:HGNC Symbol; Acc:18572]	1	87	87	Mitochondrion	Fatty Acid Metabolism	GO:0005739	45 kDa	0	0	0	0	0	0	1	0	1	0	0	0	pep:novel scaffold:cavPor3:scaffold_93:4442955:4503564:1 gene:ENSCPOG00000003091 transcript:ENSCPOT00000003134			HYDROXYSTEROID DEHYDROGENASE 2 EC 1
ENSCPOP00000014325	IAA1984	IAA1984 [Source:HGNC Symbol; Acc:28236]	1	222	222	Membrane Assoc. & Misc.			61 kDa	0	0	0	2	0	0	0	0	0	0	0	0	pep:novel scaffold:cavPor3:scaffold_18:38445082:38452255:-1 gene:ENSCPOG00000022241 transcript:ENSCPOT00000024440			UNCHARACTERIZED COILED COIL DOMAIN CONTAINING
ENSCPOP00000011074	ING4	inhibitor of growth family, member 4 [Source:HGNC Symbol; Acc:19423]	7	127; 129; 130; 146; 148; 156; 161	127; 129; 130; 146; 148; 156; 161	Nucleus	Chaperone & Structural	GO:0005634	29 kDa	0	0	0	0	0	0	0	0	0	2	4	5	pep:novel scaffold:cavPor3:scaffold_107:589423:596421:1 gene:ENSCPOG00000012311 transcript:ENSCPOT00000012428			INHIBITOR OF GROWTH
ENSCPOP00000006214	IDH3G	ISOCITRATE DEHYDROGENASE [NAD] SUBUNIT BETA MITOCHONDRIAL PRECURSOR EC_1.1.1.41 ISOCITRIC DEHYDROGENASE SUBUNIT BETA NAD + SPECIFIC ICDH SUBUNIT BETA	1	206	206	Mitochondrion	Krebs Cycle		223 kDa	0	0	0	0	0	5	6	9	8	37	35	46	pep:nown scaffold:cavPor3:scaffold_13:17431200:17450183:1 gene:ENSCPOG00000007045 transcript:ENSCPOT00000007114	TRUE	a few acetylated peptides shared with ENSCPOP00000003812	ISOCITRATE DEHYDROGENASE [NAD] SUBUNIT BETA MITOCHONDRIAL PRECURSOR EC_1.1.1.41 ISOCITRIC DEHYDROGENASE SUBUNIT BETA NAD + SPECIFIC ICDH SUBUNIT BETA
ENSCPOP00000012232	IDH1	Isocitrate dehydrogenase 1 (Fragment). [Source:UniProtB/TrEMBL; Acc:Q0QER6]	2	58; 81	58; 81	Cytoplasm	Signaling, Redox & Misc	GO:0005737	47 kDa	1	2	1	0	0	0	0	0	0	0	0	0	pep:nown scaffold:cavPor3:scaffold_13:41687356:41701856:-1 gene:ENSCPOG00000013587 transcript:ENSCPOT00000013722	TRUE	Shares 2 non-acetylated peptides with ENSCPOP00000007630	ISOCITRATE DEHYDROGENASE [NADP] IDH EC_1.1.1.42 OXALOSUCCINATE DECARBOXYLASE NADP + SPECIFIC ICDH IDP
ENSCPOP00000007630	IDH2	isocitrate dehydrogenase 2 (NADP+), mitochondrial [Source:HGNC Symbol; Acc:5383]	23	48; 67; 80; 106; 133; 155; 166; 180; 199; 205; 243; 256; 263; 272; 275; 280; 282; 299; 384; 400; 413; 442; 447	48; 67; 80; 106; 133; 155; 166; 180; 199; 205; 243; 256; 263; 272; 275; 280; 282; 299; 384; 400; 413; 442; ---	Mitochondrion	Transport	GO:0005739	63 kDa	2	1	1	0	0	0	0	0	0	0	0	0	pep:novel scaffold:cavPor3:scaffold_52:8814777:8838768:-1 gene:ENSCPOG00000008562 transcript:ENSCPOT00000008639			ISOCITRATE DEHYDROGENASE [NADP] IDH EC_1.1.1.42 OXALOSUCCINATE DECARBOXYLASE NADP + SPECIFIC ICDH IDP
ENSCPOP00000001412	IDH3A	isocitrate dehydrogenase 3 (NAD+) alpha [Source:HGNC Symbol; Acc:5384]	4	58; 77; 100; 343	58; 77; 100; 343	Mitochondrion	Krebs Cycle	GO:0005739	40 kDa	2	0	1	0	0	0	1	1	1	1	0	2	pep:novel scaffold:cavPor3:scaffold_98:1875067:1888666:1 gene:ENSCPOG00000001563 transcript:ENSCPOT00000001583			ISOCITRATE DEHYDROGENASE [NAD] SUBUNIT ALPHA MITOCHONDRIAL PRECURSOR EC_1.1.1.41 ISOCITRIC DEHYDROGENASE SUBUNIT ALPHA NAD + SPECIFIC ICDH SUBUNIT ALPHA
ENSCPOP00000013805	IDH3B	isocitrate dehydrogenase 3 (NAD+) beta [Source:HGNC Symbol; Acc:5385]	2	87; 126	96; 135	Mitochondrion	Krebs Cycle	GO:0005739	41 kDa	0	1	1	0	0	0	0	1	0	1	0	0	pep:novel scaffold:cavPor3:scaffold_8:21940631:21944769:1 gene:ENSCPOG00000015319 transcript:ENSCPOT00000015468			ISOCITRATE DEHYDROGENASE [NAD] SUBUNIT BETA MITOCHONDRIAL PRECURSOR EC_1.1.1.41 ISOCITRIC DEHYDROGENASE SUBUNIT BETA NAD + SPECIFIC ICDH SUBUNIT BETA
ENSCPOP00000011651	IARS2	isoleucyl-tRNA synthetase 2, mitochondrial [Source:HGNC Symbol; Acc:29685]	5	189; 233; 241; 479; 983	189; 233; 241; 479; 986	Mitochondrion	Protein Synthesis, Metabolism & Folding	GO:0005739	111 kDa	2	2	2	0	0	2	3	5	5	2	2	2	pep:novel scaffold:cavPor3:scaffold_13:2504462:2538385:-1 gene:ENSCPOG00000012942 transcript:ENSCPOT00000013067			ISOLEUCYL TRNA SYNTHETASE MITOCHONDRIAL EC_6.1.1.5 ISOLEUCINE TRNA LIGASE ILERS
ENSCPOP00000018477	IVD	isovaleryl-CoA dehydrogenase [Source:HGNC Symbol; Acc:6186]	6	58; 67; 78; 85; 155; 262	55; 64; 75; 82; 152; 259	Mitochondrion	Protein Synthesis, Metabolism & Folding	GO:0005739	47 kDa	5	4	5	0	0	0	6	3	3	4	0	3	pep:novel scaffold:cavPor3:scaffold_10:26104234:26115917:1 gene:ENSCPOG00000021886 transcript:ENSCPOT00000026625			ISOVALERYL COA DEHYDROGENASE MITOCHONDRIAL PRECURSOR IVD EC_1.3.99.10
ENSCPOP00000006437	LDHB	L LACTATE DEHYDROGENASE CHAIN LDH EC_1.1.1.27	2	82; 119	82; 119	Cytoplasm	Glucose Metabolism	GO:0005739	33 kDa	0	0	1	0	0	0	0	0	0	0	0	0	pep:novel scaffold:cavPor3:scaffold_10:15096255:15116972:-1 gene:ENSCPOG00000007279 transcript:ENSCPOT00000007351	TRUE	Contains 1 unique acetylated peptide; shares acetylated peptides with other isoforms i.e. tropomyosin 1 and/or 2	L LACTATE DEHYDROGENASE CHAIN LDH EC_1.1.1.27
ENSCPOP00000009602	L2HGDH	L-2-hydroxyglutarate dehydrogenase [Source:HGNC Symbol; Acc:20499]	1	60	104	Mitochondrion	Protein Synthesis, Metabolism & Folding	GO:0016021	46 kDa	0	0	0	0	0	0	1	1	1	0	0	1	pep:novel scaffold:cavPor3:scaffold_23:16216334:16250910:-1 gene:ENSCPOG00000010700 transcript:ENSCPOT00000010797			L 2 HYDROXYGLUTARATE DEHYDROGENASE MITOCHONDRIAL PRECURSOR EC_1.1.99.2
ENSCPOP00000010729	LDHA	lactate dehydrogenase A [Source:HGNC Symbol; Acc:6535]	3	87; 132; 230	81; 126; 224	Cytoplasm	Glucose Metabolism	GO:0005739	37 kDa	1	1	3	0	0	0	0	0	0	0	0	0	pep:novel scaffold:cavPor3:scaffold_227:557790:566850:-1 gene:ENSCPOG00000011926 transcript:ENSCPOT00000012041	TRUE	Shares 2 non-acetylated peptides with ENSCPOP00000006437	L LACTATE DEHYDROGENASE CHAIN LDH EC_1.1.1.27
ENSCPOP00000015745	LMNA	lamin A/C [Source:HGNC Symbol; Acc:6636]	2	58; 63	265; 270	Nucleus	Chaperone & Structural	GO:0005634	51 kDa	0	0	0	0	0	0	0	0	0	1	2	0	pep:novel scaffold:cavPor3:scaffold_10:16764342:16768514:1 gene:ENSCPOG00000023214 transcript:ENSCPOT00000026922			LAMIN
ENSCPOP00000011358	LAP3	leucine aminopeptidase 3 [Source:HGNC Symbol; Acc:18449]	1	221	221	Mitochondrion	Protein Synthesis, Metabolism & Folding	GO:0005739	56 kDa	1	1	1	0	0	0	0	0	0	0	0	0	pep:novel scaffold:cavPor3:scaffold_73:2037894:2057895:1 gene:ENSCPOG00000012626 transcript:ENSCPOT00000012747			CYTOSOL AMINOPEPTIDASE EC_3.4.11.1 LEUCINE AMINOPEPTIDASE 3 LAP 3 LEUCYL AMINOPEPTIDASE PROLINE AMINOPEPTIDASE EC_3.4.11.- 5 PROLYL AMINOPEPTIDASE
ENSCPOP00000000178	LRPPRC	leucine-rich PPR-motif containing [Source:HGNC Symbol; Acc:15714]	1	296	156	Nucleus	Chaperone & Structural	GO:0005634	155 kDa	0	0	0	0	0	0	0	1	0	0	0	0	pep:novel scaffold:cavPor3:scaffold_18:27997608:28094859:-1 gene:ENSCPOG00000000204 transcript:ENSCPOT00000000207			LEUCINE RICH PPR MOTIF CONTAINING PROTEIN MITOCHONDRIAL PRECURSOR 130 DA LEUCINE RICH LRP 130
ENSCPOP00000011748	LTA4H	Leuotriene A-4 hydrolase (EC 3.3.2.6) (Leuotriene A(4) hydrolase) (LTA-4 hydrolase). [Source:UniProtB/Swiss-Prot; Acc:P19602]	1	73	73	Cytoplasm	Signaling, Redox & Misc	GO:0005737	69 kDa	1	1	1	0	0	0	0	0	0	0	0	0	pep:nown scaffold:cavPor3:scaffold_9:5779044:5807660:1 gene:ENSCPOG00000013048 transcript:ENSCPOT00000013175			LEUOTRIENE A 4 HYDROLASE LTA 4 HYDROLASE EC_3.3.2.6 LEUOTRIENE A 4 HYDROLASE
ENSCPOP00000014052	LPP	LIM domain containing preferred translocation partner in lipoma [Source:HGNC Symbol; Acc:6679]	1	163	162	Membrane Assoc. & Misc.		GO:0005886	66 kDa	0	0	1	0	0	0	0	0	0	0	0	0	pep:novel scaffold:cavPor3:scaffold_7:53120083:53508839:1 gene:ENSCPOG00000015584 transcript:ENSCPOT00000015736			AMBIGUOUS
ENSCPOP00000019095	MDH2	Malate dehydrogenase (EC 1.1.1.37) (Fragment). [Source:UniProtB/TrEMBL; Acc:Q0QF42]	15	91; 165; 185; 203; 215; 239; 281; 296; 301; 307; 314; 324; 328; 329; 335	91; 165; 185; 203; 215; 239; ---; 296; 301; 307; 314; 324; 328; 329; 335	Mitochondrion	Krebs Cycle	GO:0005739	36 kDa	8	5	8	3	2	1	14	12	9	14	9	16	pep:nown scaffold:cavPor3:scaffold_30:1707717:1720671:1 gene:ENSCPOG00000010145 transcript:ENSCPOT00000025759			MALATE DEHYDROGENASE MITOCHONDRIAL PRECURSOR EC_1.1.1.37
ENSCPOP00000009655	MDH1	malate dehydrogenase 1, NAD (soluble) [Source:HGNC Symbol; Acc:6970]	3	73; 103; 118	73; 103; 118	Mitochondrion	Krebs Cycle	GO:0005739	36 kDa	2	1	2	0	0	1	0	0	0	0	0	0	pep:novel scaffold:cavPor3:scaffold_48:1736056:1745695:-1 gene:ENSCPOG00000010755 transcript:ENSCPOT00000010853			MALATE DEHYDROGENASE CYTOPLASMIC EC_1.1.1.37 CYTOSOLIC MALATE DEHYDROGENASE
ENSCPOP00000011321	ME2	malic enzyme 2, NAD(+)-dependent, mitochondrial [Source:HGNC Symbol; Acc:6984]	1	156	156	Mitochondrion	Krebs Cycle	GO:0005739	66 kDa	0	0	0	0	0	0	0	0	0	1	0	0	pep:novel scaffold:cavPor3:scaffold_14:14529901:14583848:-1 gene:ENSCPOG00000012583 transcript:ENSCPOT00000012704			NADP DEPENDENT MALIC ENZYME NADP ME EC_1.1.1.40 MALIC ENZYME
ENSCPOP00000009761	MCCC1	methylcrotonoyl-CoA carboxylase 1 (alpha) [Source:HGNC Symbol; Acc:6936]	1	295	295	Mitochondrion	Protein Synthesis, Metabolism & Folding	GO:0005739	80 kDa	0	0	0	0	0	0	1	0	1	0	0	0	pep:novel scaffold:cavPor3:scaffold_7:60678762:60735393:1 gene:ENSCPOG00000010866 transcript:ENSCPOT00000010966			PROPIONYL COA CARBOXYLASE ALPHA CHAIN MITOCHONDRIAL PRECURSOR PCCASE SUBUNIT ALPHA EC_6.4.1.3 PROPANOYL COA:CARBON DIOXIDE LIGASE SUBUNIT ALPHA
ENSCPOP00000002099	MRPL47	mitochondrial ribosomal protein L47 [Source:HGNC Symbol; Acc:16652]	1	146	144	Mitochondrion	Protein Synthesis, Metabolism & Folding	GO:0005739	29 kDa	0	0	0	0	0	0	0	0	0	0	0	2	pep:novel scaffold:cavPor3:scaffold_47:10520993:10533007:-1 gene:ENSCPOG00000002312 transcript:ENSCPOT00000002344			39S RIBOSOMAL L47 MITOCHONDRIAL PRECURSOR L47MT MRP L47
ENSCPOP00000006188	MB	myoglobin [Source:HGNC Symbol; Acc:6915]	7	35; 43; 46; 51; 63; 134; 146	134; 35; 43; 498; 51; 524; 63	Cytoplasm	Signaling, Redox & Misc		43 kDa	0	0	0	0	0	0	1	0	0	0	0	1	pep:novel scaffold:cavPor3:scaffold_148:1877596:1883892:1 gene:ENSCPOG00000006890 transcript:ENSCPOT00000006959			MYOGLOBIN
ENSCPOP00000009620	MYL2	myosin, light chain 2, regulatory, cardiac, slow [Source:HGNC Symbol; Acc:7583]	2	46; 165	46; 165	Sarcomere	Thic Filament	GO:0030016	19 kDa	0	0	0	0	0	0	0	0	0	2	1	1	pep:novel scaffold:cavPor3:scaffold_115:2427099:2431032:-1 gene:ENSCPOG00000010717 transcript:ENSCPOT00000010815			MYOSIN REGULATORY LIGHT CHAIN 2
ENSCPOP00000011344	MYL3	myosin, light chain 3, alali; ventricular, seletal, slow [Source:HGNC Symbol; Acc:7584]	2	138; 167	142; 171	Sarcomere	Thic Filament	GO:0031674	21 kDa	0	1	0	0	0	0	1	1	1	2	1	2	pep:novel scaffold:cavPor3:scaffold_7:47475927:47479038:-1 gene:ENSCPOG00000012609 transcript:ENSCPOT00000012730	TRUE	1 unique acetylated peptide; 1 acetylated peptide shared with ENSCPOP00000013408	MYOSIN LIGHT CHAIN MYOSIN LIGHT CHAIN MYOSIN LIGHT CHAIN
ENSCPOP00000012765	NAA50	N(alpha)-acetyltransferase 50, NatE catalytic subunit [Source:HGNC Symbol; Acc:29533]	3	34; 37; 47	34; 37; 47	Cytoplasm	Signaling, Redox & Misc	GO:0005737	19 kDa	3	3	3	0	0	0	0	0	0	0	0	0	pep:novel scaffold:cavPor3:scaffold_35:15209255:15212535:-1 gene:ENSCPOG00000014169 transcript:ENSCPOT00000014311			N ALPHA ACETYLTRANSFERASE 50 NATE CATALYTIC SUBUNIT EC_2.3.1.- N ACETYLTRANSFERASE
ENSCPOP00000009090	NDUFA10	NADH dehydrogenase (ubiquinone) 1 alpha subcomplex, 10, 42Da [Source:HGNC Symbol; Acc:7684]	1	228	228	Mitochondrion	Oxidative Phosphorylation	GO:0005739	40 kDa	0	0	0	0	0	0	0	0	0	0	1	0	pep:novel scaffold:cavPor3:scaffold_13:23919831:23958033:1 gene:ENSCPOG00000010123 transcript:ENSCPOT00000010214			NADH DEHYDROGENASE [UBIQUINONE] 1 ALPHA SUBCOMPLEX SUBUNIT 10 MITOCHONDRIAL PRECURSOR NADH UBIQUINONE OXIDOREDUCTASE 42 DA SUBUNIT COMPLEX I 42D CI 42D
ENSCPOP00000009119	NDUFA12	NADH dehydrogenase (ubiquinone) 1 alpha subcomplex, 12 [Source:HGNC Symbol; Acc:23987]	2	44; 102	43; 101	Mitochondrion	Oxidative Phosphorylation	GO:0005747	17 kDa	0	0	0	0	0	0	0	2	1	0	0	0	pep:novel scaffold:cavPor3:scaffold_9:6540988:6561102:1 gene:ENSCPOG00000010154 transcript:ENSCPOT00000010247			NADH DEHYDROGENASE [UBIQUINONE] 1 ALPHA SUBCOMPLEX SUBUNIT 12 NADH UBIQUINONE OXIDOREDUCTASE SUBUNIT B17 2 COMPLEX I B17 2 CI B17 2 CIB17 2
ENSCPOP00000008240	NDUFA2	NADH dehydrogenase (ubiquinone) 1 alpha subcomplex, 2, 8Da [Source:HGNC Symbol; Acc:7685]	1	75	---	Mitochondrion	Oxidative Phosphorylation	GO:0005739	11 kDa	0	0	0	0	0	0	0	0	0	1	0	1	pep:novel scaffold:cavPor3:scaffold_6:2945562:2947327:-1 gene:ENSCPOG00000009178 transcript:ENSCPOT00000009261			UNNOWN
ENSCPOP00000009167	NDUFA9	NADH dehydrogenase (ubiquinone) 1 alpha subcomplex, 9, 39Da [Source:HGNC Symbol; Acc:7693]	1	189	189	Mitochondrion	Oxidative Phosphorylation	GO:0005739	43 kDa	0	0	0	0	0	0	1	0	0	0	0	1	pep:novel scaffold:cavPor3:scaffold_107:2720121:2755930:1 gene:ENSCPOG00000010206 transcript:ENSCPOT00000010299			NADH DEHYDROGENASE [UBIQUINONE] 1 ALPHA SUBCOMPLEX SUBUNIT 9 MITOCHONDRIAL PRECURSOR NADH UBIQUINONE OXIDOREDUCTASE 39 DA SUBUNIT COMPLEX I 39D CI 39D
ENSCPOP00000002669	NDUFB11	NADH dehydrogenase (ubiquinone) 1 beta subcomplex, 11, 17.3Da [Source:HGNC Symbol; Acc:20372]	1	68	---	Mitochondrion	Oxidative Phosphorylation		18 kDa	0	0	0	0	0	0	0	0	1	2	0	2	pep:novel scaffold:cavPor3:scaffold_132:641754:644280:-1 gene:ENSCPOG00000002938 transcript:ENSCPOT00000002975			NADH DEHYDROGENASE [UBIQUINONE] 1 BETA SUBCOMPLEX SUBUNIT 11 MITOCHONDRIAL PRECURSOR NADH UBIQUINONE OXIDOREDUCTASE ESSS SUBUNIT COMPLEX I ESSS CI ESSS
ENSCPOP00000012344	NDUFB6	NADH dehydrogenase (ubiquinone) 1 beta subcomplex, 6, 17Da [Source:HGNC Symbol; Acc:7701]	1	9	9	Mitochondrion	Oxidative Phosphorylation	GO:0005739	16 kDa	0	0	0	0	0	0	0	0	0	0	1	0	pep:novel scaffold:cavPor3:scaffold_27:13320622:13333685:-1 gene:ENSCPOG00000013707 transcript:ENSCPOT00000013846			NADH DEHYDROGENASE [UBIQUINONE] 1 BETA SUBCOMPLEX SUBUNIT 6 NADH UBIQUINONE OXIDOREDUCTASE B17 SUBUNIT COMPLEX I B17 CI B17
ENSCPOP00000006603	NDUFB9	NADH dehydrogenase (ubiquinone) 1 beta subcomplex, 9, 22Da [Source:HGNC Symbol; Acc:7704]	3	59; 138; 150	59; 138; ---	Mitochondrion	Oxidative Phosphorylation	GO:0005739	39 kDa	1	0	1	2	0	1	0	0	0	0	0	0	pep:novel scaffold:cavPor3:scaffold_4:44977426:44980103:-1 gene:ENSCPOG00000007434 transcript:ENSCPOT00000007506	TRUE	shares non-acetylated peptides with ENSCPOP00000017636	NADH DEHYDROGENASE [UBIQUINONE] 1 BETA SUBCOMPLEX SUBUNIT 9 NADH UBIQUINONE OXIDOREDUCTASE B22 SUBUNIT COMPLEX I B22 CI B22
ENSCPOP00000010829	NDUFAB1	NADH dehydrogenase (ubiquinone) 1, alpha/beta subcomplex, 1, 8Da [Source:HGNC Symbol; Acc:7694]	2	92; 97	92; 97	Mitochondrion	Oxidative Phosphorylation	GO:0005739	17 kDa	0	0	0	0	0	0	1	0	0	1	0	2	pep:novel scaffold:cavPor3:scaffold_4:40014146:40023545:-1 gene:ENSCPOG00000012038 transcript:ENSCPOT00000012154			ACYL CARRIER PROTEIN MITOCHONDRIAL PRECURSOR ACP NADH UBIQUINONE OXIDOREDUCTASE 9.6 DA SUBUNIT
ENSCPOP00000005002	NDUFS1	NADH dehydrogenase (ubiquinone) Fe-S protein 1, 75Da (NADH-coenzyme Q reductase) [Source:HGNC Symbol; Acc:7707]	5	85; 312; 451; 468; 471	84; 311; 450; 467; 470	Mitochondrion	Oxidative Phosphorylation	GO:0005739	47 kDa	2	1	1	0	0	0	0	0	0	0	0	0	pep:nown scaffold:cavPor3:scaffold_25:24439713:24448145:1 gene:ENSCPOG00000005812 transcript:ENSCPOT00000005874	TRUE	Containes 2 unique acetylated peptides; shares 4 non-acetylated peptides with ENSCPOP00000007974	NADH UBIQUINONE OXIDOREDUCTASE 75 DA SUBUNIT MITOCHONDRIAL PRECURSOR EC_1.6.5.3 EC_1.6.99.- 3 COMPLEX I 75D CI 75D
ENSCPOP00000005538	NDUFS3	NADH dehydrogenase (ubiquinone) Fe-S protein 3, 30Da (NADH-coenzyme Q reductase) [Source:HGNC Symbol; Acc:7710]	2	58; 263	56; 261	Mitochondrion	Oxidative Phosphorylation	GO:0031966	34 kDa	1	1	1	0	0	0	1	1	1	0	0	1	pep:novel scaffold:cavPor3:scaffold_98:2603528:2651679:-1 gene:ENSCPOG00000006181 transcript:ENSCPOT00000006245			NADH DEHYDROGENASE [UBIQUINONE] IRON SULFUR 3 MITOCHONDRIAL PRECURSOR EC_1.6.5.3 EC_1.6.99.- 3 NADH UBIQUINONE OXIDOREDUCTASE 30 DA SUBUNIT COMPLEX I 30D CI 30D
ENSCPOP00000003406	NDUFS6	NADH dehydrogenase (ubiquinone) Fe-S protein 6, 13Da (NADH-coenzyme Q reductase) [Source:HGNC Symbol; Acc:7713]	2	41; 112	49; ---	Mitochondrion	Oxidative Phosphorylation	GO:0005739	13 kDa	0	0	0	0	0	0	2	2	2	1	0	2	pep:novel scaffold:cavPor3:scaffold_150:1140885:1148178:-1 gene:ENSCPOG00000003772 transcript:ENSCPOT00000003816			NADH DEHYDROGENASE [UBIQUINONE] IRON SULFUR 6 MITOCHONDRIAL PRECURSOR NADH UBIQUINONE OXIDOREDUCTASE 13 DA A SUBUNIT COMPLEX I 13D A CI 13D A
ENSCPOP00000005984	NDUFV1	NADH dehydrogenase (ubiquinone) flavoprotein 1, 51Da [Source:HGNC Symbol; Acc:7716]	5	36; 64; 66; 104; 375	36; 64; 66; 104; 375	Mitochondrion	Oxidative Phosphorylation	GO:0005739	48 kDa	0	0	0	4	3	3	7	7	6	4	4	5	pep:novel scaffold:cavPor3:scaffold_4:38435711:38461669:1 gene:ENSCPOG00000006687 transcript:ENSCPOT00000006755			NADH DEHYDROGENASE [UBIQUINONE] FLAVOPROTEIN 1 MITOCHONDRIAL PRECURSOR EC_1.6.5.3 EC_1.6.99.- 3 NADH UBIQUINONE OXIDOREDUCTASE 51 DA SUBUNIT COMPLEX I 51D CI 51D
ENSCPOP00000002037	NDUFA5	NADH DEHYDROGENASE [UBIQUINONE] 1 ALPHA SUBCOMPLEX SUBUNIT 5 NADH UBIQUINONE OXIDOREDUCTASE 13 DA B SUBUNIT COMPLEX I 13D B CI 13D B COMPLEX I SUBUNIT B13	1	40	40	Mitochondrion	Oxidative Phosphorylation	GO:0005739	13 kDa	0	0	0	0	0	0	0	0	0	1	0	0	pep:novel scaffold:cavPor3:scaffold_11:44627074:44637529:-1 gene:ENSCPOG00000002246 transcript:ENSCPOT00000002278			NADH DEHYDROGENASE [UBIQUINONE] 1 ALPHA SUBCOMPLEX SUBUNIT 5 NADH UBIQUINONE OXIDOREDUCTASE 13 DA B SUBUNIT COMPLEX I 13D B CI 13D B COMPLEX I SUBUNIT B13
ENSCPOP00000007621	NDUFV2	NADH DEHYDROGENASE [UBIQUINONE] FLAVOPROTEIN 2 MITOCHONDRIAL PRECURSOR EC_1.6.5.3 EC_1.6.99.- 3 NADH UBIQUINONE OXIDOREDUCTASE 24 DA SUBUNIT	2	61; 209	61; 209	Mitochondrion	Oxidative Phosphorylation	GO:0005739	51 kDa	23	24	23	19	15	18	22	24	22	20	14	27	pep:novel scaffold:cavPor3:scaffold_10:34101089:34115102:1 gene:ENSCPOG00000008488 transcript:ENSCPOT00000008565	TRUE	Shares 2 non-acetylated peptides with ENSCPOP00000012232	NADH DEHYDROGENASE [UBIQUINONE] FLAVOPROTEIN 2 MITOCHONDRIAL PRECURSOR EC_1.6.5.3 EC_1.6.99.- 3 NADH UBIQUINONE OXIDOREDUCTASE 24 DA SUBUNIT
ENSCPOP00000009821	NEDD8	neural precursor cell expressed, developmentally down-regulated 8 [Source:HGNC Symbol; Acc:7732]	1	48	48	Nucleus	Chaperone & Structural	GO:0005634	9 kDa	0	1	1	0	0	0	0	0	0	0	0	0	pep:novel scaffold:cavPor3:scaffold_13:16632206:16634297:1 gene:ENSCPOG00000010930 transcript:ENSCPOT00000011031			UNNOWN
ENSCPOP00000002046	NNT	nicotinamide nucleotide transhydrogenase [Source:HGNC Symbol; Acc:7863]	13	63; 70; 84; 100; 117; 166; 169; 229; 294; 331; 394; 397; 403	63; 70; 84; 100; 117; 166; ---; 229; 294; 331; 394; 397; 403	Mitochondrion	Transport	GO:0005739	114 kDa	0	0	0	3	3	7	12	11	11	8	7	8	pep:novel scaffold:cavPor3:scaffold_29:13436911:13515990:-1 gene:ENSCPOG00000002255 transcript:ENSCPOT00000002287			NAD P TRANSHYDROGENASE MITOCHONDRIAL PRECURSOR EC_1.6.1.2 NICOTINAMIDE NUCLEOTIDE TRANSHYDROGENASE PYRIDINE NUCLEOTIDE TRANSHYDROGENASE
ENSCPOP00000002163	NIT2	nitrilase family, member 2 [Source:HGNC Symbol; Acc:29878]	1	66	68	Mitochondrion	Apoptosis & Misc	GO:0005739	30 kDa	0	1	1	0	0	0	0	0	0	0	0	0	pep:novel scaffold:cavPor3:scaffold_35:2144216:2160932:1 gene:ENSCPOG00000002379 transcript:ENSCPOT00000002412			OMEGA AMIDASE NIT2 EC_3.5.1.3 NITRILASE HOMOLOG 2
ENSCPOP00000005853	NLRX1	NLR family member X1 [Source:HGNC Symbol; Acc:29890]	1	305	301	Mitochondrion	Apoptosis & Misc	GO:0005739	51 kDa	0	0	0	0	0	1	3	2	5	2	0	0	pep:novel scaffold:cavPor3:scaffold_42:8074962:8079844:1 gene:ENSCPOG00000006645 transcript:ENSCPOT00000006711			NLR FAMILY MEMBER X1 PRECURSOR
ENSCPOP00000002122	HMGN1	non-histone chromosomal protein HMG-14-lie	1	32	32	Nucleus	Transcr.		11 kDa	0	0	0	0	0	0	0	0	0	0	0	1	pep:novel scaffold:cavPor3:scaffold_90:3691366:3697389:1 gene:ENSCPOG00000002336 transcript:ENSCPOT00000002368			UNNOWN
ENSCPOP00000015130 (+8)	HIST1H2BE	Novel transcript [Type: protein coding Ensembl]	10	6; 12; 13; 16; 17; 21; 24; 109; 117; 121	6; 12; 122; 13; 16; 17; 21; 24; 110; 118	Nucleus	Histones		14 kDa	0	0	0	0	0	0	7	5	6	12	12	13	pep:novel scaffold:cavPor3:scaffold_108:1665430:1665810:1 gene:ENSCPOG00000022212 transcript:ENSCPOT00000022288	TRUE	many acetylated peptides shared amoung isoforms encoded by multiple genes
ENSCPOP00000003038	OGDH	oxoglutarate (alpha-ketoglutarate) dehydrogenase (lipoamide) [Source:HGNC Symbol; Acc:8124]	3	276; 401; 970	276; 401; 970	Mitochondrion	Krebs Cycle	GO:0005739	116 kDa	1	0	2	1	1	2	1	2	2	0	1	1	pep:novel scaffold:cavPor3:scaffold_66:2440059:2494038:-1 gene:ENSCPOG00000003361 transcript:ENSCPOT00000003404			2 OXOGLUTARATE DEHYDROGENASE MITOCHONDRIAL PRECURSOR EC_1.2.4.2 ALPHA ketoGLUTARATE DEHYDROGENASE 2 OXOGLUTARATE DEHYDROGENASE COMPLEX COMPONENT E1 OGDC E1
ENSCPOP00000002392	PPIA	Peptidyl-prolyl cis-trans isomerase (EC 5.2.1.8) (Fragment). [Source:UniProtB/TrEMBL; Acc:Q9QZ91]	3	77; 132; 134	76; 131; 133	Cytoplasm	Translation and Protein Folding	GO:0005634	18 kDa	3	3	3	1	1	0	0	0	0	0	0	0	pep:nown scaffold:cavPor3:scaffold_66:2406002:2408736:-1 gene:ENSCPOG00000002632 transcript:ENSCPOT00000002666			PEPTIDYL PROLYL CIS TRANS ISOMERASE A PPIASE A EC_5.2.1.8 ROTAMASE A CYCLOPHILIN A CYCLOSPORIN A BINDING
ENSCPOP00000012305	PPIF	peptidylprolyl isomerase F [Source:HGNC Symbol; Acc:9259]	1	179	175	Mitochondrion	Protein Synthesis, Metabolism & Folding	GO:0005739	22 kDa	0	0	0	0	0	0	0	0	1	0	0	0	pep:novel scaffold:cavPor3:scaffold_15:27333037:27338216:1 gene:ENSCPOG00000013666 transcript:ENSCPOT00000013804			PEPTIDYL PROLYL CIS TRANS ISOMERASE A PPIASE A EC_5.2.1.8 ROTAMASE A CYCLOPHILIN A CYCLOSPORIN A BINDING
ENSCPOP00000006718	PRDX3	peroxiredoxin 3 [Source:HGNC Symbol; Acc:9354]	2	84; 92	83; 91	Mitochondrion	Redox	GO:0005739	33 kDa	0	0	0	0	0	0	0	0	1	0	0	0	pep:novel scaffold:cavPor3:scaffold_52:12354816:12361038:-1 gene:ENSCPOG00000007646 transcript:ENSCPOT00000007719			THIOREDOXIN PEROXIDASE THIOREDOXIN DEPENDENT PEROXIDE REDUCTASE
ENSCPOP00000016009	PRDX5	peroxiredoxin 5 [Source:HGNC Symbol; Acc:9355]	1	86	83	Mitochondrion	Redox	GO:0005777	22 kDa	0	0	0	0	0	0	0	1	0	0	0	0	pep:novel scaffold:cavPor3:scaffold_42:5264816:5267777:1 gene:ENSCPOG00000021239 transcript:ENSCPOT00000027847			PEROXIREDOXIN 5 MITOCHONDRIAL PRECURSOR EC_1.11.1.15 PEROXIREDOXIN V PRX V PEROXISOMAL ANTIOXIDANT ENZYME PLP THIOREDOXIN REDUCTASE THIOREDOXIN PEROXIDASE PMP20 ANTIOXIDANT ENZYME B166 AOEB166
ENSCPOP00000016787	PEBP1	phosphatidylethanolamine binding protein 1 [Source:HGNC Symbol; Acc:8630]	1	22	---	Cytoplasm			21 kDa	1	0	1	0	0	0	0	0	0	0	0	0	pep:novel scaffold:cavPor3:scaffold_4:3463966:3469793:1 gene:ENSCPOG00000024082 transcript:ENSCPOT00000019892			PHOSPHATIDYLETHANOLAMINE BINDING 1 PEBP 1 HCNPPP [CONTAINS HIPPOCAMPAL CHOLINERGIC NEUROSTIMULATING PEPTIDE HCNP ]
ENSCPOP00000007508	PFM	phosphofructokinase, muscle [Source:HGNC Symbol; Acc:8877]	2	443; 749	372; 678	Cytoplasm	Glucose Metabolism		59 kDa	0	0	0	0	0	0	0	0	0	1	0	0	pep:novel scaffold:cavPor3:scaffold_52:12426960:12436947:-1 gene:ENSCPOG00000008471 transcript:ENSCPOT00000008548
ENSCPOP00000015876	PG1	phosphoglycerate kinase 1 [Source:HGNC Symbol; Acc:8896]	2	76; 132	75; 131	Cytoplasm	Glucose Metabolism		45 kDa	2	2	2	0	0	0	0	0	0	0	0	0	pep:novel scaffold:cavPor3:scaffold_26:18357834:18375659:-1 gene:ENSCPOG00000023785 transcript:ENSCPOT00000019791			PHOSPHOGLYCERATE kinase EC_2.7.2.3
ENSCPOP00000006169	PGAM1	PHOSPHOGLYCERATE MUTASE EC_5.4.2.1 EC_5.4.2.- 4 EC_3.1.-.- 3 13 PHOSPHOGLYCERATE MUTASE ISOZYME PGAM	3	5; 39; 100	5; 39; 100	Cytoplasm	Glucose Metabolism		17 kDa	7	6	7	0	0	1	0	0	0	0	0	0	pep:novel scaffold:cavPor3:scaffold_140:2258615:2264853:-1 gene:ENSCPOG00000006864 transcript:ENSCPOT00000006933			PHOSPHOGLYCERATE MUTASE EC_5.4.2.1 EC_5.4.2.- 4 EC_3.1.-.- 3 13 PHOSPHOGLYCERATE MUTASE ISOZYME PGAM
ENSCPOP00000007733	PYGM	phosphorylase, glycogen, muscle	3	291; 794; 812	290; 793; 811	Cytoplasm	Glucose Metabolism		97 kDa	0	0	0	0	0	3	0	0	0	0	0	0	pep:novel scaffold:cavPor3:scaffold_42:5597099:5610003:-1 gene:ENSCPOG00000008604 transcript:ENSCPOT00000008682
ENSCPOP00000008574	PABPC4	poly(A) binding protein, cytoplasmic 4 (inducible form) [Source:HGNC Symbol; Acc:8557]	1	108	108	Cytoplasm	Translation and Protein Folding		72 kDa	0	1	0	0	0	1	0	0	0	0	0	0	pep:novel scaffold:cavPor3:scaffold_143:1575063:1590511:-1 gene:ENSCPOG00000009552 transcript:ENSCPOT00000009638			POLYADENYLATE BINDING PROTEIN CYTOPLASMIC AND NUCLEAR POLY A BINDING PABP POLYADENYLATE TAIL BINDING
ENSCPOP00000002782	ALB	Preproalbumin precursor. [Source:UniProtB/TrEMBL; Acc:Q6WDN9]	25	65; 88; 117; 130; 184; 198; 205; 210; 212; 229; 236; 246; 286; 298; 300; 305; 375; 380; 383; 396; 421; 453; 490; 569; 580	65; 88; 117; 130; ---; 198; 205; ---; ---; 229; 236; 246; 286; 298; 300; 305; 375; 379; 383; 396;---; ---; 490; 569; 581	Membrane Assoc. & Misc.		GO:0005615	69 kDa	22	21	13	1	1	1	0	0	0	0	0	0	pep:nown scaffold:cavPor3:scaffold_47:631721:647024:-1 gene:ENSCPOG00000003072 transcript:ENSCPOT00000003114			PRECURSOR
ENSCPOP00000010137	PCCA	propionyl CoA carboxylase, alpha polypeptide [Source:HGNC Symbol; Acc:8653]	2	90; 495	150; 553	Mitochondrion	Protein Synthesis, Metabolism & Folding	GO:0005739	74 kDa	1	1	0	0	0	0	1	2	0	0	0	0	pep:novel scaffold:cavPor3:scaffold_5:23906759:24283840:-1 gene:ENSCPOG00000011274 transcript:ENSCPOT00000011380			PROPIONYL COA CARBOXYLASE ALPHA CHAIN MITOCHONDRIAL PRECURSOR PCCASE SUBUNIT ALPHA EC_6.4.1.3 PROPANOYL COA:CARBON DIOXIDE LIGASE SUBUNIT ALPHA
ENSCPOP00000019378	PSMB3	proteasome (prosome, macropain) subunit, beta type, 3 [Source:HGNC Symbol; Acc:9540]	1	77	77	Cytoplasm	Translation and Protein Folding		23 kDa	1	1	1	0	0	0	0	0	0	0	0	0	pep:novel scaffold:cavPor3:scaffold_53:9800480:9807357:1 gene:ENSCPOG00000025974 transcript:ENSCPOT00000022467			PROTEASOME SUBUNIT BETA TYPE 3 EC_3.4.25.1 PROTEASOME THETA CHAIN PROTEASOME CHAIN 13 PROTEASOME COMPONENT C10 II
ENSCPOP00000007712	PPP2R1A	protein phosphatase 2, regulatory subunit A, alpha [Source:HGNC Symbol; Acc:9302]	1	253	280	Cytoplasm	Signaling, Redox & Misc	GO:0005829	97 kDa	0	0	0	0	0	3	0	0	0	0	0	0	pep:novel scaffold:cavPor3:scaffold_42:5597099:5610003:-1 gene:ENSCPOG00000008604 transcript:ENSCPOT00000008682	TRUE	Multiple acetylated peptides; 1 shared with ENSCPOP0000000840	SERINE/THREONINE PHOSPHATASE 2A 65 DA REGULATORY SUBUNIT A PP2A SUBUNIT A PR65 PP2A SUBUNIT A R1
ENSCPOP00000010702	TGM2	Protein-glutamine gamma-glutamyltransferase (EC 2.3.2.13), liver (Fragment). [Source:UniProtB/TrEMBL; Acc:Q7M0F8]	1	205	205	Cytoplasm	Signaling, Redox & Misc		77 kDa	1	1	1	0	0	0	0	0	0	0	0	0	pep:novel scaffold:cavPor3:scaffold_45:4541716:4573012:-1 gene:ENSCPOG00000011896 transcript:ENSCPOT00000012011			GLUTAMINE GAMMA GLUTAMYLTRANSFERASE EC_2.3.2.13 TRANSGLUTAMINASE TGASE TG TRANSGLUTAMINASE TGASE
ENSCPOP00000011409 (+1)	PPA2	pyrophosphatase (inorganic) 2 [Source:HGNC Symbol; Acc:28883]	3	128; 171; 173	216; 259; 261	Mitochondrion	Apoptosis & Misc		28 kDa	0	0	2	0	0	0	0	0	0	0	0	2	pep:novel scaffold:cavPor3:scaffold_43:5607266:5658730:-1 gene:ENSCPOG00000012683 transcript:ENSCPOT00000012804
ENSCPOP00000006048	PDHB	pyruvate dehydrogenase (lipoamide) beta [Source:HGNC Symbol; Acc:8808]	3	336; 347; 354	336; 347; 354	Mitochondrion	Krebs Cycle	GO:0005739	11 kDa	0	0	0	0	0	0	1	0	0	1	1	1	pep:novel scaffold:cavPor3:scaffold_133:482874:494940:-1 gene:ENSCPOG00000006779 transcript:ENSCPOT00000006848			PYRUVATE DEHYDROGENASE E1 COMPONENT SUBUNIT BETA MITOCHONDRIAL PRECURSOR PDHE1 B EC_1.2.4.1
ENSCPOP00000002806	PDHX	pyruvate dehydrogenase complex, component X [Source:HGNC Symbol; Acc:21350]	3	323; 396; 460	321; 394; 434	Mitochondrion	Krebs Cycle	GO:0005739	55 kDa	0	0	0	0	2	1	2	2	2	1	0	0	pep:novel scaffold:cavPor3:scaffold_92:3897135:3958678:-1 gene:ENSCPOG00000003099 transcript:ENSCPOT00000003142			DIHYDROLIPOYLLYSINE RESIDUE ACETYLTRANSFERASE COMPONENT OF PYRUVATE DEHYDROGENASE COMPLEX MITOCHONDRIAL PRECURSOR EC_2.3.1.12 DIHYDROLIPOAMIDE ACETYLTRANSFERASE COMPONENT OF PYRUVATE DEHYDROGENASE COMPLEX PYRUVATE DEHYDROGENASE COMPLEX COMPONENT E2 PDC E2
ENSCPOP00000008332	PDHA1	PYRUVATE DEHYDROGENASE E1 COMPONENT SUBUNIT ALPHA SOMATIC FORM MITOCHONDRIAL PRECURSOR EC_1.2.4.1 PDHE1 A TYPE I	9	39; 63; 77; 83; 244; 313; 321; 336; 344	39; 63; 77; 83; 244; 313; 321; 336; 344	Mitochondrion	Krebs Cycle		43 kDa	6	3	4	8	8	8	8	7	8	8	9	9	pep:novel scaffold:cavPor3:scaffold_59:2045699:2060270:1 gene:ENSCPOG00000009280 transcript:ENSCPOT00000009365			PYRUVATE DEHYDROGENASE E1 COMPONENT SUBUNIT ALPHA SOMATIC FORM MITOCHONDRIAL PRECURSOR EC_1.2.4.1 PDHE1 A TYPE I
ENSCPOP00000008101	PM2	pyruvate kinase, muscle [Source:HGNC Symbol; Acc:9021]	3	66; 135; 166	66; 135; 166	Cytoplasm	Glucose Metabolism	GO:0005739	58 kDa	3	1	1	0	0	0	0	0	0	0	0	0	pep:novel scaffold:cavPor3:scaffold_5:61120435:61133739:-1 gene:ENSCPOG00000009020 transcript:ENSCPOT00000009103			PYRUVATE kinase EC_2.7.1.40
ENSCPOP00000001659	ARHGDIA	Rho GDP dissociation inhibitor (GDI) alpha [Source:HGNC Symbol; Acc:678]	2	141; 178	141; 178	Cytoplasm	Signaling, Redox & Misc	GO:0001772	23 kDa	2	0	2	0	0	0	0	0	0	0	0	0	pep:novel scaffold:cavPor3:scaffold_76:6266190:6267280:-1 gene:ENSCPOG00000001832 transcript:ENSCPOT00000001853			RHO GDP DISSOCIATION INHIBITOR RHO GDI RHO GDI
ENSCPOP00000007144	RYR2	ryanodine receptor 2 (cardiac) [Source:HGNC Symbol; Acc:10484]	1	1087	1141	Membrane Assoc. & Misc.		GO:0016529	28 kDa	0	0	0	0	0	0	1	0	0	1	0	1	pep:novel scaffold:cavPor3:scaffold_70:6531838:6544665:1 gene:ENSCPOG00000007941 transcript:ENSCPOT00000008016			RYANODINE RECEPTOR 1 RYR 1 RYR1 SELETAL MUSCLE TYPE RYANODINE RECEPTOR SELETAL MUSCLE CALCIUM RELEASE CHANNEL
ENSCPOP00000013842	SERPINA3	Serine proteinase inhibitor A3 precursor (Serpin A3) (Contrapsin) (CP). [Source:UniProtB/Swiss-Prot; Acc:P22323]	3	171; 179; 290	179; 187; ---	Membrane Assoc. & Misc.		GO:0005576	46 kDa	3	3	3	0	0	0	0	0	0	0	0	0	pep:nown scaffold:cavPor3:scaffold_114:766370:770831:1 gene:ENSCPOG00000015357 transcript:ENSCPOT00000015506	TRUE	Contains 1 unique acetylated peptide; shares acetylated peptides with other isoforms i.e. ENSCPOP00000013843 and/or …11412	PRECURSOR
ENSCPOP00000013353	SLC25A12	solute carrier family 25 (mitochondrial carrier, Aralar), member 12 [Source:HGNC Symbol; Acc:10982]	1	575	578	Mitochondrion	Transport	GO:0005739	74 kDa	0	0	0	0	0	0	0	1	1	0	0	0	pep:novel scaffold:cavPor3:scaffold_3:17880593:17968263:1 gene:ENSCPOG00000014818 transcript:ENSCPOT00000014963	TRUE	No issues	CALCIUM BINDING MITOCHONDRIAL CARRIER MITOCHONDRIAL ASPARTATE GLUTAMATE CARRIER SOLUTE CARRIER FAMILY 25 MEMBER
ENSCPOP00000004744	SLC25A4	solute carrier family 25 (mitochondrial carrier; adenine nucleotide translocator), member 4 [Source:HGNC Symbol; Acc:10990]	13	10; 23; 92; 94; 96; 107; 147; 163; 166; 199; 252; 268; 272	10; 23; 92; 94; 96; 107; 147; 163; 166; 199; 262; 268; 272	Mitochondrion	Transport	GO:0005739	54 kDa	10	9	9	10	8	11	14	11	12	7	10	10	pep:novel scaffold:cavPor3:scaffold_31:12905617:12932904:-1 gene:ENSCPOG00000005312 transcript:ENSCPOT00000005369			ADP/ATP TRANSLOCASE ADENINE NUCLEOTIDE TRANSLOCATOR ANT ADP ATP CARRIER SOLUTE CARRIER FAMILY 25 MEMBER
ENSCPOP00000004508	SLC25A11	solute carrier family 25 (mitochondrial carrier; oxoglutarate carrier), member 11 [Source:HGNC Symbol; Acc:10981]	1	256	256	Mitochondrion	Transport	GO:0005739	59 kDa	0	0	0	0	0	2	2	1	1	2	2	0	pep:novel scaffold:cavPor3:scaffold_62:5469429:5497388:1 gene:ENSCPOG00000005166 transcript:ENSCPOT00000005221			MITOCHONDRIAL 2 OXOGLUTARATE/MALATE CARRIER OGCP SOLUTE CARRIER FAMILY 25 MEMBER 11
ENSCPOP00000010440	SLC25A3	solute carrier family 25 (mitochondrial carrier; phosphate carrier), member 3 [Source:HGNC Symbol; Acc:10989]	6	98; 208; 213; 217; 233; 308	99; 209; 214; 218; 234; 309	Mitochondrion	Transport	GO:0005739	40 kDa	0	0	0	1	0	0	4	6	5	2	2	3	pep:novel scaffold:cavPor3:scaffold_9:3588155:3594238:-1 gene:ENSCPOG00000011606 transcript:ENSCPOT00000011718			PHOSPHATE CARRIER PROTEIN MITOCHONDRIAL PRECURSOR PHOSPHATE TRANSPORT PTP SOLUTE CARRIER FAMILY 25 MEMBER 3
ENSCPOP00000009597	SCP2	sterol carrier protein 2 [Source:HGNC Symbol; Acc:10606]	1	438	438	Mitochondrion	Fatty Acid Metabolism	GO:0005739	59 kDa	0	0	0	1	1	0	0	0	0	0	0	0	pep:novel scaffold:cavPor3:scaffold_321:211223:393569:-1 gene:ENSCPOG00000010695 transcript:ENSCPOT00000010792			NON SPECIFIC LIPID TRANSFER NSL TP EC_2.3.1.176 PROPANOYL COA C ACYLTRANSFERASE STEROL CARRIER 2 SCP 2 STEROL CARRIER X SCP X SCP CHI SCPX
ENSCPOP00000008066	SMC3	structural maintenance of chromosomes 3 [Source:HGNC Symbol; Acc:2468]	2	105; 106	105; 106	Nucleus	Chaperone & Structural	GO:0005737	142 kDa	0	0	0	0	0	0	0	0	0	2	3	0	pep:novel scaffold:cavPor3:scaffold_11:4889709:4922479:-1 gene:ENSCPOG00000008978 transcript:ENSCPOT00000009060			STRUCTURAL MAINTENANCE OF CHROMOSOMES 3 SMC 3 SMC 3 CHONDROITIN SULFATE PROTEOGLYCAN 6
ENSCPOP00000008014	SDHA	Succinate dehydrogenase complex subunit A (Fragment). [Source:UniProtB/TrEMBL; Acc:Q0QF16]	9	407; 483; 492; 502; 523; 535; 593; 618; 621	"---; 538; 608; 633; 636; 498; 517; 550; ---;	Mitochondrion	Oxidative Phosphorylation	GO:0005739	71 kDa	2	1	1	1	1	4	8	5	6	3	3	5	pep:novel scaffold:cavPor3:scaffold_150:1970861:1992859:-1 gene:ENSCPOG00000008921 transcript:ENSCPOT00000009001	TRUE	Contains 4 uniqe peptides; shares several acetylated peptides with ENCSPOP00000008015	SUCCINATE DEHYDROGENASE [UBIQUINONE] FLAVOPROTEIN SUBUNIT MITOCHONDRIAL PRECURSOR EC_1.3.5.1 FLAVOPROTEIN SUBUNIT OF COMPLEX II FP
ENSCPOP00000008015	SDHA	Succinate dehydrogenase complex subunit A (Fragment). [Source:UniProtB/TrEMBL; Acc:Q0QF16]	6	363; 420; 438; 447; 457; 490	---; ---; 480; 498; 517; 550	Mitochondrion	Oxidative Phosphorylation		60 kDa	0	0	0	0	0	0	1	1	1	0	0	2	pep:nown scaffold:cavPor3:scaffold_150:1972806:1991339:-1 gene:ENSCPOG00000008921 transcript:ENSCPOT00000009002	TRUE	Contains 3 unique overlapping acetylated peptides; shares several acetylated peptides with ENCSPOP00000008014	SUCCINATE DEHYDROGENASE [UBIQUINONE] FLAVOPROTEIN SUBUNIT MITOCHONDRIAL PRECURSOR EC_1.3.5.1 FLAVOPROTEIN SUBUNIT OF COMPLEX II FP
ENSCPOP00000013483	SUCLA2	succinate-CoA ligase, ADP-forming, beta subunit [Source:HGNC Symbol; Acc:11448]	3	58; 338; 408	88; 368; ---	Mitochondrion	Krebs Cycle	GO:0005739	47 kDa	1	2	2	0	0	0	3	1	1	1	2	1	pep:novel scaffold:cavPor3:scaffold_6:57908024:57954535:-1 gene:ENSCPOG00000014961 transcript:ENSCPOT00000015107	TRUE	3 unique acetylated peptides; 2 non-acetylated peptides shared with ENSCPOP00000012084	SUCCINYL COA LIGASE FORMING] SUBUNIT BETA MITOCHONDRIAL PRECURSOR SPECIFIC SUCCINYL COA SYNTHETASE SUBUNIT BETA SUCCINYL COA SYNTHETASE BETA CHAIN SCS
ENSCPOP00000002733	SUCLG1	succinate-CoA ligase, alpha subunit [Source:HGNC Symbol; Acc:11449]	7	48; 54; 57; 66; 93; 105; 192	48; 54; 57; 66; ---; 105; 192	Mitochondrion	Krebs Cycle	GO:0005739	36 kDa	5	5	5	3	2	4	6	6	7	5	4	5	pep:novel scaffold:cavPor3:scaffold_37:5976417:6004088:1 gene:ENSCPOG00000003017 transcript:ENSCPOT00000003056			SUCCINYL COA LIGASE [GDP FORMING] SUBUNIT ALPHA MITOCHONDRIAL PRECURSOR EC_6.2.1.4 SUCCINYL COA SYNTHETASE SUBUNIT ALPHA SCS ALPHA
ENSCPOP00000012084	SUCLG2	succinate-CoA ligase, GDP-forming, beta subunit [Source:HGNC Symbol; Acc:11450]	4	198; 243; 251; 319	---; 271; 279; 347	Mitochondrion	Krebs Cycle	GO:0005739	44 kDa	2	1	4	0	0	0	3	2	2	1	1	1	pep:novel scaffold:cavPor3:scaffold_16:19620624:19831690:-1 gene:ENSCPOG00000013421 transcript:ENSCPOT00000013553	TRUE	4 unique acetylated peptides; 2 non-acetylated peptides shared with ENSCPOP00000013483	SUCCINYL COA LIGASE FORMING] SUBUNIT BETA MITOCHONDRIAL PRECURSOR SPECIFIC SUCCINYL COA SYNTHETASE SUBUNIT BETA SUCCINYL COA SYNTHETASE BETA CHAIN SCS
ENSCPOP00000012815	SOD1	Superoxide dismutase [Cu-Zn] (EC 1.15.1.1). [Source:UniProtB/Swiss-Prot; Acc:P33431]	1	132	123	Mitochondrion	Redox	GO:0005737	17 kDa	1	1	1	0	0	0	0	0	0	0	0	0	pep:nown scaffold:cavPor3:scaffold_52:1829283:1835223:-1 gene:ENSCPOG00000014223 transcript:ENSCPOT00000014365			SUPEROXIDE DISMUTASE [CU ZN] EC_1.15.1.1
ENSCPOP00000017103	SOD2	Superoxide dismutase [Mn], mitochondrial precursor (EC 1.15.1.1) (Fragment). [Source:UniProtB/Swiss-Prot; Acc:P49114]	6	63; 70; 117; 125; 127; 197	68; 75; 122; 130; 132; 202	Mitochondrion	Redox	GO:0005739	24 kDa	6	3	4	2	3	2	4	3	4	4	3	4	pep:nown scaffold:cavPor3:scaffold_60:10525123:10534088:1 gene:ENSCPOG00000000378 transcript:ENSCPOT00000026680			SUPEROXIDE DISMUTASE [MN] MITOCHONDRIAL EC_1.15.1.1
ENSCPOP00000009899	TXNRD2	thioredoxin reductase 2 [Source:HGNC Symbol; Acc:18155]	3	154; 159; 507	153; 158; 506	Mitochondrion	Redox	GO:0005739	57 kDa	2	2	3	0	0	1	2	2	2	0	0	3	pep:novel scaffold:cavPor3:scaffold_4:18979981:19032554:-1 gene:ENSCPOG00000011013 transcript:ENSCPOT00000011114			THIOREDOXIN REDUCTASE EC_1.8.1.9 THIOREDOXIN REDUCTASE
ENSCPOP00000003526	TTN	titin [Source:HGNC Symbol; Acc:12403]	6	1333; 1760; 1853; 1864; 7965; 9775	12599; 13026; 13119; 13130; 19231	Sarcomere	Other		1832 kDa	0	0	0	0	0	1	0	0	0	1	3	3	pep:novel scaffold:cavPor3:scaffold_3:11859161:11992100:1 gene:ENSCPOG00000003907 transcript:ENSCPOT00000003951	TRUE	many shared non-acetylated peptides with ENSCPOP00000014751	TITIN FRAGMENT
ENSCPOP00000014751	TTN	titin [Source:HGNC Symbol; Acc:12403]	7	2720; 4532; 4983; 5326; 13934; 14736; 14744	21042; 21491; 30441; 31242; 31250; 19231	Sarcomere	Other		1629 kDa	0	0	0	0	0	0	0	0	0	2	1	2	pep:novel scaffold:cavPor3:scaffold_3:11929130:11992796:1 gene:ENSCPOG00000003907 transcript:ENSCPOT00000022569	TRUE	acetylated peptides shared with ENSCPOP00000016281 with ENSCPOP00000003526	TITIN FRAGMENT
ENSCPOP00000001717	TALDO1	transaldolase 1 [Source:HGNC Symbol; Acc:11559]	3	286; 292; 321	286; 292; 321	Cytoplasm	Glucose Metabolism		36 kDa	2	1	1	0	0	0	0	0	0	0	0	0	pep:novel scaffold:cavPor3:scaffold_218:190762:197578:-1 gene:ENSCPOG00000001899 transcript:ENSCPOT00000001920			TRANSALDOLASE EC_2.2.1.2
ENSCPOP00000001424	TF	transferrin [Source:HGNC Symbol; Acc:11740]	1	641	646	Membrane Assoc. & Misc.		GO:0048471	109 kDa	1	0	0	0	0	0	0	0	0	0	0	0	pep:novel scaffold:cavPor3:scaffold_8:30902087:30958307:1 gene:ENSCPOG00000001577 transcript:ENSCPOT00000001597			TRANSFERRIN
ENSCPOP00000000062	TT	transketolase [Source:HGNC Symbol; Acc:11834]	1	288	314	Cytoplasm	Glucose Metabolism		65 kDa	0	1	1	0	0	0	0	0	0	0	0	0	pep:novel scaffold:cavPor3:scaffold_0:55316584:55330701:1 gene:ENSCPOG00000000072 transcript:ENSCPOT00000000072			TRANSketoLASE EC_2.2.1.1
ENSCPOP00000011563	TTR	transthyretin [Source:HGNC Symbol; Acc:12405]	1	14	35	Membrane Assoc. & Misc.			14 kDa	1	0	0	0	0	0	0	0	0	0	0	0	pep:novel scaffold:cavPor3:scaffold_14:32249592:32254930:-1 gene:ENSCPOG00000012845 transcript:ENSCPOT00000012970			TRANSTHYRETIN PRECURSOR PREALBUMIN
ENSCPOP00000011106	TPI1	triosephosphate isomerase 1 [Source:HGNC Symbol; Acc:12009]	2	193; 275	193; 275	Cytoplasm	Glucose Metabolism		30 kDa	2	1	1	0	0	0	0	0	0	0	0	0	pep:novel scaffold:cavPor3:scaffold_107:398689:402677:-1 gene:ENSCPOG00000012344 transcript:ENSCPOT00000012461			TRIOSEPHOSPHATE ISOMERASE TIM EC_5.3.1.1 TRIOSE PHOSPHATE ISOMERASE
ENSCPOP00000009794	TPM1	tropomyosin 1 (alpha) [Source:HGNC Symbol; Acc:12010]	7	112; 118; 152; 161; 217; 220; 248	112; 118; 152; 161; 217; ---; 248	Sarcomere	Thin Filament	GO:0005737	33 kDa	3	3	5	0	0	0	0	0	0	1	1	5	pep:novel scaffold:cavPor3:scaffold_98:1033898:1057934:1 gene:ENSCPOG00000010901 transcript:ENSCPOT00000011002	TRUE	Contains 2 unique acetylated peptides; shares acetylated peptides with other isoforms i.e. tropomyosin 2 and/or 3	TROPOMYOSIN
ENSCPOP00000006558	TPM3	tropomyosin 3 [Source:HGNC Symbol; Acc:12012]	5	113; 119; 214; 218; 221	113; 119; 213;---; 221	Sarcomere	Thin Filament	GO:0005737	22 kDa	0	0	0	0	0	0	0	0	0	2	0	6	pep:novel scaffold:cavPor3:scaffold_51:11246067:11253138:-1 gene:ENSCPOG00000007325 transcript:ENSCPOT00000007397			TROPOMYOSIN
ENSCPOP00000002955	TNNC1	troponin C type 1 (slow) [Source:HGNC Symbol; Acc:11943]	1	43	43	Sarcomere	Thin Filament	GO:0005861	18 kDa	0	1	0	0	0	0	0	0	0	0	0	0	pep:novel scaffold:cavPor3:scaffold_0:56092696:56095526:1 gene:ENSCPOG00000003265 transcript:ENSCPOT00000003308			TROPONIN C SLOW SELETAL AND CARDIAC MUSCLES TN C
ENSCPOP00000016138	TNNI3	troponin I type 3 (cardiac) [Source:HGNC Symbol; Acc:11947]	8	37; 38; 107; 118; 132; 175; 178; 194	36; 37; 106; 117; 131; 174; 177; 193	Sarcomere	Thin Filament	GO:0030017	24 kDa	2	0	3	8	0	8	0	0	0	0	0	1	pep:novel scaffold:cavPor3:scaffold_70:264329:268759:1 gene:ENSCPOG00000020449 transcript:ENSCPOT00000021458			TROPONIN I CARDIAC MUSCLE CARDIAC TROPONIN I
ENSCPOP00000013810 (+1)	TNNT2	Troponin T (Fragment).	1	70	74	Sarcomere	Thin Filament		35 kDa	1	1	1	0	0	0	0	0	0	0	0	0	pep:nown scaffold:cavPor3:scaffold_12:21062483:21074010:1 gene:ENSCPOG00000015324 transcript:ENSCPOT00000015473
ENSCPOP00000009458	TUFM	Tu translation elongation factor, mitochondrial [Source:HGNC Symbol; Acc:12420]	2	256; 342	256; 276	Mitochondrion	Protein Synthesis, Metabolism & Folding	GO:0005739	50 kDa	1	0	0	0	0	0	1	2	0	1	0	0	pep:novel scaffold:cavPor3:scaffold_4:44688181:44692956:1 gene:ENSCPOG00000010534 transcript:ENSCPOT00000010629	TRUE	No issues	ELONGATION FACTOR TU MITOCHONDRIAL PRECURSOR
ENSCPOP00000010922	UQCRB	ubiquinol-cytochrome c reductase binding protein [Source:HGNC Symbol; Acc:12582]	5	45; 78; 83; 88; 96	45; 78; 83; ---; 96	Mitochondrion	Oxidative Phosphorylation		14 kDa	0	0	0	0	0	0	3	3	0	3	1	5	pep:novel scaffold:cavPor3:scaffold_0:19470918:19475074:1 gene:ENSCPOG00000012149 transcript:ENSCPOT00000012265			CYTOCHROME B C1 COMPLEX SUBUNIT 7 UBIQUINOL CYTOCHROME C REDUCTASE COMPLEX 14 DA COMPLEX III SUBUNIT 7 COMPLEX III SUBUNIT VII
ENSCPOP00000003855	UQCRC1	ubiquinol-cytochrome c reductase core protein I [Source:HGNC Symbol; Acc:12585]	6	85; 111; 138; 163; 248; 447	85; 111; 138; 163; 248; 447	Mitochondrion	Oxidative Phosphorylation	GO:0005739	36 kDa	0	0	1	0	0	0	0	0	0	0	0	1	pep:novel scaffold:cavPor3:scaffold_22:24631501:24644577:-1 gene:ENSCPOG00000004549 transcript:ENSCPOT00000004598			MITOCHONDRIAL PROCESSING PEPTIDASE SUBUNIT BETA PRECURSOR EC_3.4.24.64 BETA MPP
ENSCPOP00000006024	UQCRC2	ubiquinol-cytochrome c reductase core protein II [Source:HGNC Symbol; Acc:12586]	9	42; 66; 92; 98; 162; 199; 250; 352; 359	42; 66; 92; 98; 162; 199; 250; 352; 359	Mitochondrion	Oxidative Phosphorylation	GO:0005739	39 kDa	0	0	0	1	1	1	3	1	0	2	1	3	pep:novel scaffold:cavPor3:scaffold_0:56808126:56813926:-1 gene:ENSCPOG00000006713 transcript:ENSCPOT00000006781			CYTOCHROME B C1 COMPLEX SUBUNIT 2 MITOCHONDRIAL PRECURSOR UBIQUINOL CYTOCHROME C REDUCTASE COMPLEX CORE 2 CORE II COMPLEX III SUBUNIT 2
ENSCPOP00000006110	UQCRH	ubiquinol-cytochrome c reductase hinge protein [Source:HGNC Symbol; Acc:12590]	1	43	42	Mitochondrion	Oxidative Phosphorylation	GO:0005739	29 kDa	2	2	1	0	0	1	0	0	0	0	0	0	pep:novel scaffold:cavPor3:scaffold_1:31134238:31141657:1 gene:ENSCPOG00000006844 transcript:ENSCPOT00000006913	TRUE	Containes 2 unique acetylated peptides; shares 1 acetylated peptide with ENSCPOP00000006005	UNNOWN
ENSCPOP00000017707	UQCRQ	ubiquinol-cytochrome c reductase, complex III subunit VII, 9.5Da [Source:HGNC Symbol; Acc:29594]	1	33	33	Mitochondrion	Oxidative Phosphorylation	GO:0005739	10 kDa	0	0	0	0	0	0	1	0	1	1	1	1	pep:novel scaffold:cavPor3:scaffold_81:2011324:2012236:1 gene:ENSCPOG00000022324 transcript:ENSCPOT00000026976			UNNOWN
ENSCPOP00000001873	UQCRFS1	ubiquinol-cytochrome c reductase, Riese iron-sulfur polypeptide-lie 1 [Source:HGNC Symbol; Acc:12588]	2	46; 101	46; 110	Mitochondrion	Oxidative Phosphorylation	GO:0005739	30 kDa	0	0	0	0	0	0	1	1	1	1	0	1	pep:novel scaffold:cavPor3:scaffold_56:4476537:4480571:1 gene:ENSCPOG00000002069 transcript:ENSCPOT00000002096			CYTOCHROME B C1 COMPLEX SUBUNIT RIESE MITOCHONDRIAL PRECURSOR EC_1.10.2.2 UBIQUINOL CYTOCHROME C REDUCTASE IRON SULFUR SUBUNIT RIESE IRON SULFUR RISP CYTOCHROME B C1 COMPLEX SUBUNIT 5 COMPLEX III SUBUNIT 5 [CONTAINS CYTOCHROME B C1 COMPLEX SUBUNIT 11 UB
ENSCPOP00000005737	UBE2F	ubiquitin-conjugating enzyme E2F (putative) [Source:HGNC Symbol; Acc:12480]	2	35; 39	35; 39	Membrane Assoc. & Misc.			39 kDa	1	1	1	1	1	2	1	1	0	2	2	2	pep:novel scaffold:cavPor3:scaffold_101:3490897:3515922:-1 gene:ENSCPOG00000006400 transcript:ENSCPOT00000006465			NEDD8 CONJUGATING ENZYME UBE2F EC_6.3.2.- UBIQUITIN CONJUGATING ENZYME E2 F NEDD8 LIGASE UBE2F NEDD8 CARRIER UBE2F NEDD8 CONJUGATING ENZYME 2
ENSCPOP00000011862	ACAD9	VERY LONG CHAIN SPECIFIC ACYL COA DEHYDROGENASE MITOCHONDRIAL PRECURSOR EC_1.3.99.-	1	258	258	Mitochondrion	Fatty Acid Metabolism	GO:0005739	69 kDa	0	0	0	0	0	0	0	0	1	0	0	0	pep:novel scaffold:cavPor3:scaffold_101:566385:595998:1 gene:ENSCPOG00000013176 transcript:ENSCPOT00000013303			VERY LONG CHAIN SPECIFIC ACYL COA DEHYDROGENASE MITOCHONDRIAL PRECURSOR EC_1.3.99.-
ENSCPOP00000000951	VIM	vimentin [Source:HGNC Symbol; Acc:12692]	2	162; 367	168; 373	Cytoskeleton	Cytoskeleton	GO:0005737	53 kDa	1	2	0	0	0	0	0	0	0	0	0	0	pep:novel scaffold:cavPor3:scaffold_120:1613987:1621123:-1 gene:ENSCPOG00000001054 transcript:ENSCPOT00000001064	TRUE	shared non-acetylated peptides with ENSCPOP00000002239	AMBIGUOUS
ENSCPOP00000017704	VDAC1	VOLTAGE DEPENDENT ANION SELECTIVE CHANNEL VDAC OUTER MITOCHONDRIAL MEMBRANE PORIN	4	20; 28; 61; 224	20; 28; 61; 224	Mitochondrion	Transport		31 kDa	0	0	0	2	2	1	4	1	1	2	1	2	pep:novel scaffold:cavPor3:scaffold_81:3026472:3041363:-1 gene:ENSCPOG00000023840 transcript:ENSCPOT00000025252			VOLTAGE DEPENDENT ANION SELECTIVE CHANNEL VDAC OUTER MITOCHONDRIAL MEMBRANE PORIN
ENSCPOP00000002499	VDAC2	voltage-dependent anion channel 2 [Source:HGNC Symbol; Acc:12672]	2	31; 74	31; 74	Mitochondrion	Transport	GO:0005739	32 kDa	0	0	0	1	2	1	2	2	1	0	0	1	pep:novel scaffold:cavPor3:scaffold_15:23732017:23745973:1 gene:ENSCPOG00000002752 transcript:ENSCPOT00000002787			VOLTAGE DEPENDENT ANION SELECTIVE CHANNEL VDAC OUTER MITOCHONDRIAL MEMBRANE PORIN
ENSCPOP00000009440	VDAC3	voltage-dependent anion channel 3 [Source:HGNC Symbol; Acc:12674]	9	15; 20; 28; 61; 63; 115; 119; 174; 226	15; 20; 28; 61; 63; 116; 120; 174; ---	Mitochondrion	Transport	GO:0005739	31 kDa	0	0	0	5	3	5	3	4	5	2	1	0	pep:novel scaffold:cavPor3:scaffold_80:560729:570896:-1 gene:ENSCPOG00000010512 transcript:ENSCPOT00000010607			VOLTAGE DEPENDENT ANION SELECTIVE CHANNEL VDAC OUTER MITOCHONDRIAL MEMBRANE PORIN
ENSCPOP00000004382	WDR1	WD repeat1 protein. [Source:UniProtB/TrEMBL; Acc:Q8R4Z8]	2	90; 251	95; 256	Cytoplasm	Signaling, Redox & Misc		252 kDa	3	2	2	0	0	1	0	0	0	0	2	4	pep:novel scaffold:cavPor3:scaffold_4:23698843:23800983:-1 gene:ENSCPOG00000004987 transcript:ENSCPOT00000005041	TRUE	No issues	WD REPEAT CONTAINING 1 ACTIN INTERACTING 1

## Sheet: Unique genes in Figure 1C
Gene products not found in Choudhary, Zhao et al. or Kim et al.
ACAD10
ACOT13
ACTN2
ALDH7A1
APF
APOA1BP
ATP5D
ATP5EP2
AUH
CA1
CKM
CKMT2
CLYBL
COQ6
COQ9
COX5A
CRYAB
CYC1
EIF5A2
ENO3
FABP3
FETUB
FLNC
HBA
HIBADH
HIST1H4D
HRG
IDH3G
KIAA1984
LPP
MB
MYH7
MYL2
MYL3
NDUFB11
NDUFB6
NDUFB9
NDUFS3
NDUFV2
NIT2
NLRX1
PEBP1
PGAM1
RYR2
SERPINA3K
SLC25A12
TGM2
TNNC1
TNNI3
TNNT2
TTR
UQCRFS1
UQCRQ
