# Supplementary material for: The Cardiac Acetyl-Lysine Proteome
Source: PLoS One. 2013 Jul 2;8(7):e67513. doi: 10.1371/journal.pone.0067513 (PMC3699649; doi:10.1371/journal.pone.0067513)
Supplement: Table S4 — Intraprotein Site Identification Frequency. For each acetylation site identified, the number of spectra implicating that site is expressed as a percentage of the total number of spectra attributed to all acetylation sites within a given protein. This provides an indication of the relative frequency with which each site on a protein was identified. Despite confounding factors discussed in the text, it may provide a tool to help prioritize the construction of site-mutants for proteins with many acetylation sites. (XLSX) [file pone.0067513.s004.xlsx]

## Sheet: PTM Count
Protein Accession	Protein Name	Site	Best Ascore	No. of Site IDs (# Spectra implicating site)	Total Site IDs per Protein	Site ID frequency (% of Total)	Primary Among Identified Sites?
ENSCPOP00000000012	pep:novel scaffold:cavPor3:scaffold_20:18244261:18266481:-1 gene:ENSCPOG00000000015 transcript:ENSCPOT00000000015	K53	1	74	224	33.0357	Yes
ENSCPOP00000000012	pep:novel scaffold:cavPor3:scaffold_20:18244261:18266481:-1 gene:ENSCPOG00000000015 transcript:ENSCPOT00000000015	K74	1	59	224	26.3393
ENSCPOP00000000012	pep:novel scaffold:cavPor3:scaffold_20:18244261:18266481:-1 gene:ENSCPOG00000000015 transcript:ENSCPOT00000000015	K50	1	26	224	11.6071
ENSCPOP00000000012	pep:novel scaffold:cavPor3:scaffold_20:18244261:18266481:-1 gene:ENSCPOG00000000015 transcript:ENSCPOT00000000015	K45	1	24	224	10.7143
ENSCPOP00000000012	pep:novel scaffold:cavPor3:scaffold_20:18244261:18266481:-1 gene:ENSCPOG00000000015 transcript:ENSCPOT00000000015	K115	1	20	224	8.92857
ENSCPOP00000000012	pep:novel scaffold:cavPor3:scaffold_20:18244261:18266481:-1 gene:ENSCPOG00000000015 transcript:ENSCPOT00000000015	K111	1	20	224	8.92857
ENSCPOP00000000012	pep:novel scaffold:cavPor3:scaffold_20:18244261:18266481:-1 gene:ENSCPOG00000000015 transcript:ENSCPOT00000000015	K127	1	1	224	0.446429
ENSCPOP00000000062	pep:novel scaffold:cavPor3:scaffold_0:55316584:55330701:1 gene:ENSCPOG00000000072 transcript:ENSCPOT00000000072	K288	1	3	3	100	Yes
ENSCPOP00000000178	pep:novel scaffold:cavPor3:scaffold_18:27997608:28094859:-1 gene:ENSCPOG00000000204 transcript:ENSCPOT00000000207	K296	1	1	1	100	Yes
ENSCPOP00000000235	pep:known scaffold:cavPor3:scaffold_4:20169103:20169845:1 gene:ENSCPOG00000000267 transcript:ENSCPOT00000000270	K57	1	45	75	60	Yes
ENSCPOP00000000235	pep:known scaffold:cavPor3:scaffold_4:20169103:20169845:1 gene:ENSCPOG00000000267 transcript:ENSCPOT00000000270	K17	1	9	75	12
ENSCPOP00000000235	pep:known scaffold:cavPor3:scaffold_4:20169103:20169845:1 gene:ENSCPOG00000000267 transcript:ENSCPOT00000000270	K8	1	9	75	12
ENSCPOP00000000235	pep:known scaffold:cavPor3:scaffold_4:20169103:20169845:1 gene:ENSCPOG00000000267 transcript:ENSCPOT00000000270	K12	1	8	75	10.6667
ENSCPOP00000000235	pep:known scaffold:cavPor3:scaffold_4:20169103:20169845:1 gene:ENSCPOG00000000267 transcript:ENSCPOT00000000270	K61	0.43	3	75	4
ENSCPOP00000000235	pep:known scaffold:cavPor3:scaffold_4:20169103:20169845:1 gene:ENSCPOG00000000267 transcript:ENSCPOT00000000270	K41	0.99	1	75	1.33333
ENSCPOP00000000366	pep:novel scaffold:cavPor3:scaffold_3:60137952:60141698:1 gene:ENSCPOG00000000415 transcript:ENSCPOT00000000418	K11	1	18	40	45	Yes
ENSCPOP00000000366	pep:novel scaffold:cavPor3:scaffold_3:60137952:60141698:1 gene:ENSCPOG00000000415 transcript:ENSCPOT00000000418	K52	1	7	40	17.5
ENSCPOP00000000366	pep:novel scaffold:cavPor3:scaffold_3:60137952:60141698:1 gene:ENSCPOG00000000415 transcript:ENSCPOT00000000418	K48	0.9	7	40	17.5
ENSCPOP00000000366	pep:novel scaffold:cavPor3:scaffold_3:60137952:60141698:1 gene:ENSCPOG00000000415 transcript:ENSCPOT00000000418	K50	0.14	7	40	17.5
ENSCPOP00000000366	pep:novel scaffold:cavPor3:scaffold_3:60137952:60141698:1 gene:ENSCPOG00000000415 transcript:ENSCPOT00000000418	K14	0	1	40	2.5
ENSCPOP00000000631	pep:novel scaffold:cavPor3:scaffold_146:2060215:2070177:1 gene:ENSCPOG00000000710 transcript:ENSCPOT00000000715	K60	1	277	866	31.9861	Yes
ENSCPOP00000000631	pep:novel scaffold:cavPor3:scaffold_146:2060215:2070177:1 gene:ENSCPOG00000000710 transcript:ENSCPOT00000000715	K54	1	268	866	30.9469
ENSCPOP00000000631	pep:novel scaffold:cavPor3:scaffold_146:2060215:2070177:1 gene:ENSCPOG00000000710 transcript:ENSCPOT00000000715	K70	1	143	866	16.5127
ENSCPOP00000000631	pep:novel scaffold:cavPor3:scaffold_146:2060215:2070177:1 gene:ENSCPOG00000000710 transcript:ENSCPOT00000000715	K192	1	104	866	12.0092
ENSCPOP00000000631	pep:novel scaffold:cavPor3:scaffold_146:2060215:2070177:1 gene:ENSCPOG00000000710 transcript:ENSCPOT00000000715	K176	1	73	866	8.42956
ENSCPOP00000000631	pep:novel scaffold:cavPor3:scaffold_146:2060215:2070177:1 gene:ENSCPOG00000000710 transcript:ENSCPOT00000000715	K73	0.54	1	866	0.115473
ENSCPOP00000000897	pep:novel scaffold:cavPor3:scaffold_4:45993765:45996883:1 gene:ENSCPOG00000000998 transcript:ENSCPOT00000001006	K184	1	2	3	66.6667	Yes
ENSCPOP00000000897	pep:novel scaffold:cavPor3:scaffold_4:45993765:45996883:1 gene:ENSCPOG00000000998 transcript:ENSCPOT00000001006	K192	1	1	3	33.3333
ENSCPOP00000000951	pep:novel scaffold:cavPor3:scaffold_120:1613987:1621123:-1 gene:ENSCPOG00000001054 transcript:ENSCPOT00000001064	K162	1	3	5	60	Yes
ENSCPOP00000000951	pep:novel scaffold:cavPor3:scaffold_120:1613987:1621123:-1 gene:ENSCPOG00000001054 transcript:ENSCPOT00000001064	K367	1	2	5	40
ENSCPOP00000000963	pep:novel scaffold:cavPor3:scaffold_47:14288037:14408362:1 gene:ENSCPOG00000001066 transcript:ENSCPOT00000001077	K21	1	1	1	100	Yes
ENSCPOP00000001164	pep:novel scaffold:cavPor3:scaffold_44:8767055:8784056:1 gene:ENSCPOG00000001285 transcript:ENSCPOT00000001301	K263	1	1	1	100	Yes
ENSCPOP00000001378	pep:known scaffold:cavPor3:scaffold_71:5337899:5339176:1 gene:ENSCPOG00000001523 transcript:ENSCPOT00000001543	K83	1	213	357	59.6639	Yes
ENSCPOP00000001378	pep:known scaffold:cavPor3:scaffold_71:5337899:5339176:1 gene:ENSCPOG00000001523 transcript:ENSCPOT00000001543	K145	1	38	357	10.6443
ENSCPOP00000001378	pep:known scaffold:cavPor3:scaffold_71:5337899:5339176:1 gene:ENSCPOG00000001523 transcript:ENSCPOT00000001543	K96	1	34	357	9.52381
ENSCPOP00000001378	pep:known scaffold:cavPor3:scaffold_71:5337899:5339176:1 gene:ENSCPOG00000001523 transcript:ENSCPOT00000001543	K45	1	31	357	8.68347
ENSCPOP00000001378	pep:known scaffold:cavPor3:scaffold_71:5337899:5339176:1 gene:ENSCPOG00000001523 transcript:ENSCPOT00000001543	K88	1	22	357	6.16246
ENSCPOP00000001378	pep:known scaffold:cavPor3:scaffold_71:5337899:5339176:1 gene:ENSCPOG00000001523 transcript:ENSCPOT00000001543	K9	1	9	357	2.52101
ENSCPOP00000001378	pep:known scaffold:cavPor3:scaffold_71:5337899:5339176:1 gene:ENSCPOG00000001523 transcript:ENSCPOT00000001543	K67	1	5	357	1.40056
ENSCPOP00000001378	pep:known scaffold:cavPor3:scaffold_71:5337899:5339176:1 gene:ENSCPOG00000001523 transcript:ENSCPOT00000001543	K77	1	3	357	0.840336
ENSCPOP00000001378	pep:known scaffold:cavPor3:scaffold_71:5337899:5339176:1 gene:ENSCPOG00000001523 transcript:ENSCPOT00000001543	K62	0.97	2	357	0.560224
ENSCPOP00000001412	pep:novel scaffold:cavPor3:scaffold_98:1875067:1888666:1 gene:ENSCPOG00000001563 transcript:ENSCPOT00000001583	K58	1	16	24	66.6667	Yes
ENSCPOP00000001412	pep:novel scaffold:cavPor3:scaffold_98:1875067:1888666:1 gene:ENSCPOG00000001563 transcript:ENSCPOT00000001583	K343	1	3	24	12.5
ENSCPOP00000001412	pep:novel scaffold:cavPor3:scaffold_98:1875067:1888666:1 gene:ENSCPOG00000001563 transcript:ENSCPOT00000001583	K100	1	3	24	12.5
ENSCPOP00000001412	pep:novel scaffold:cavPor3:scaffold_98:1875067:1888666:1 gene:ENSCPOG00000001563 transcript:ENSCPOT00000001583	K77	1	2	24	8.33333
ENSCPOP00000001424	pep:novel scaffold:cavPor3:scaffold_8:30902087:30958307:1 gene:ENSCPOG00000001577 transcript:ENSCPOT00000001597	K641	1	1	1	100	Yes
ENSCPOP00000001659	pep:novel scaffold:cavPor3:scaffold_76:6266190:6267280:-1 gene:ENSCPOG00000001832 transcript:ENSCPOT00000001853	K141	1	4	7	57.1429	Yes
ENSCPOP00000001659	pep:novel scaffold:cavPor3:scaffold_76:6266190:6267280:-1 gene:ENSCPOG00000001832 transcript:ENSCPOT00000001853	K178	1	3	7	42.8571
ENSCPOP00000001717	pep:novel scaffold:cavPor3:scaffold_218:190762:197578:-1 gene:ENSCPOG00000001899 transcript:ENSCPOT00000001920	K321	1	7	9	77.7778	Yes
ENSCPOP00000001717	pep:novel scaffold:cavPor3:scaffold_218:190762:197578:-1 gene:ENSCPOG00000001899 transcript:ENSCPOT00000001920	K292	1	1	9	11.1111
ENSCPOP00000001717	pep:novel scaffold:cavPor3:scaffold_218:190762:197578:-1 gene:ENSCPOG00000001899 transcript:ENSCPOT00000001920	K286	0.32	1	9	11.1111
ENSCPOP00000001864	pep:novel scaffold:cavPor3:scaffold_4:22325663:22342496:-1 gene:ENSCPOG00000002059 transcript:ENSCPOT00000002086	K92	1	26	44	59.0909	Yes
ENSCPOP00000001864	pep:novel scaffold:cavPor3:scaffold_4:22325663:22342496:-1 gene:ENSCPOG00000002059 transcript:ENSCPOT00000002086	K271	1	18	44	40.9091
ENSCPOP00000001873	pep:novel scaffold:cavPor3:scaffold_56:4476537:4480571:1 gene:ENSCPOG00000002069 transcript:ENSCPOT00000002096	K46	1	18	19	94.7368	Yes
ENSCPOP00000001873	pep:novel scaffold:cavPor3:scaffold_56:4476537:4480571:1 gene:ENSCPOG00000002069 transcript:ENSCPOT00000002096	K101	1	1	19	5.26316
ENSCPOP00000001880	pep:known scaffold:cavPor3:scaffold_10:20672255:20676454:-1 gene:ENSCPOG00000002077 transcript:ENSCPOT00000002104	K52	1	145	200	72.5	Yes
ENSCPOP00000001880	pep:known scaffold:cavPor3:scaffold_10:20672255:20676454:-1 gene:ENSCPOG00000002077 transcript:ENSCPOT00000002104	K63	1	51	200	25.5
ENSCPOP00000001880	pep:known scaffold:cavPor3:scaffold_10:20672255:20676454:-1 gene:ENSCPOG00000002077 transcript:ENSCPOT00000002104	K317	1	2	200	1
ENSCPOP00000001880	pep:known scaffold:cavPor3:scaffold_10:20672255:20676454:-1 gene:ENSCPOG00000002077 transcript:ENSCPOT00000002104	K328	1	1	200	0.5
ENSCPOP00000001880	pep:known scaffold:cavPor3:scaffold_10:20672255:20676454:-1 gene:ENSCPOG00000002077 transcript:ENSCPOT00000002104	K330	1	1	200	0.5
ENSCPOP00000002037	pep:novel scaffold:cavPor3:scaffold_11:44627074:44637529:-1 gene:ENSCPOG00000002246 transcript:ENSCPOT00000002278	K40	1	1	1	100	Yes
ENSCPOP00000002046	pep:novel scaffold:cavPor3:scaffold_29:13436911:13515990:-1 gene:ENSCPOG00000002255 transcript:ENSCPOT00000002287	K100	1	545	1266	43.049	Yes
ENSCPOP00000002046	pep:novel scaffold:cavPor3:scaffold_29:13436911:13515990:-1 gene:ENSCPOG00000002255 transcript:ENSCPOT00000002287	K70	1	257	1266	20.3002
ENSCPOP00000002046	pep:novel scaffold:cavPor3:scaffold_29:13436911:13515990:-1 gene:ENSCPOG00000002255 transcript:ENSCPOT00000002287	K394	1	140	1266	11.0585
ENSCPOP00000002046	pep:novel scaffold:cavPor3:scaffold_29:13436911:13515990:-1 gene:ENSCPOG00000002255 transcript:ENSCPOT00000002287	K331	1	130	1266	10.2686
ENSCPOP00000002046	pep:novel scaffold:cavPor3:scaffold_29:13436911:13515990:-1 gene:ENSCPOG00000002255 transcript:ENSCPOT00000002287	K403	1	55	1266	4.34439
ENSCPOP00000002046	pep:novel scaffold:cavPor3:scaffold_29:13436911:13515990:-1 gene:ENSCPOG00000002255 transcript:ENSCPOT00000002287	K117	1	44	1266	3.47551
ENSCPOP00000002046	pep:novel scaffold:cavPor3:scaffold_29:13436911:13515990:-1 gene:ENSCPOG00000002255 transcript:ENSCPOT00000002287	K397	1	33	1266	2.60664
ENSCPOP00000002046	pep:novel scaffold:cavPor3:scaffold_29:13436911:13515990:-1 gene:ENSCPOG00000002255 transcript:ENSCPOT00000002287	K63	1	30	1266	2.36967
ENSCPOP00000002046	pep:novel scaffold:cavPor3:scaffold_29:13436911:13515990:-1 gene:ENSCPOG00000002255 transcript:ENSCPOT00000002287	K169	0.5	15	1266	1.18483
ENSCPOP00000002046	pep:novel scaffold:cavPor3:scaffold_29:13436911:13515990:-1 gene:ENSCPOG00000002255 transcript:ENSCPOT00000002287	K166	1	11	1266	0.868878
ENSCPOP00000002046	pep:novel scaffold:cavPor3:scaffold_29:13436911:13515990:-1 gene:ENSCPOG00000002255 transcript:ENSCPOT00000002287	K294	1	3	1266	0.236967
ENSCPOP00000002046	pep:novel scaffold:cavPor3:scaffold_29:13436911:13515990:-1 gene:ENSCPOG00000002255 transcript:ENSCPOT00000002287	K229	1	2	1266	0.157978
ENSCPOP00000002046	pep:novel scaffold:cavPor3:scaffold_29:13436911:13515990:-1 gene:ENSCPOG00000002255 transcript:ENSCPOT00000002287	K84	1	1	1266	0.0789889
ENSCPOP00000002086	pep:novel scaffold:cavPor3:scaffold_76:6482886:6497275:-1 gene:ENSCPOG00000002297 transcript:ENSCPOT00000002329	K959	1	3	6	50	Yes (Tie)
ENSCPOP00000002086	pep:novel scaffold:cavPor3:scaffold_76:6482886:6497275:-1 gene:ENSCPOG00000002297 transcript:ENSCPOT00000002329	K70	1	3	6	50	Yes (Tie)
ENSCPOP00000002099	pep:novel scaffold:cavPor3:scaffold_47:10520993:10533007:-1 gene:ENSCPOG00000002312 transcript:ENSCPOT00000002344	K146	1	8	8	100	Yes
ENSCPOP00000002122	pep:novel scaffold:cavPor3:scaffold_90:3691366:3697389:1 gene:ENSCPOG00000002336 transcript:ENSCPOT00000002368	K32	0.44	1	1	100	Yes
ENSCPOP00000002148	pep:novel scaffold:cavPor3:scaffold_6:963339:978817:-1 gene:ENSCPOG00000002363 transcript:ENSCPOT00000002396	K134	1	401	1003	39.9801	Yes
ENSCPOP00000002148	pep:novel scaffold:cavPor3:scaffold_6:963339:978817:-1 gene:ENSCPOG00000002363 transcript:ENSCPOT00000002396	K299	1	252	1003	25.1246
ENSCPOP00000002148	pep:novel scaffold:cavPor3:scaffold_6:963339:978817:-1 gene:ENSCPOG00000002363 transcript:ENSCPOT00000002396	K287	1	139	1003	13.8584
ENSCPOP00000002148	pep:novel scaffold:cavPor3:scaffold_6:963339:978817:-1 gene:ENSCPOG00000002363 transcript:ENSCPOT00000002396	K599	1	95	1003	9.47159
ENSCPOP00000002148	pep:novel scaffold:cavPor3:scaffold_6:963339:978817:-1 gene:ENSCPOG00000002363 transcript:ENSCPOT00000002396	K359	1	81	1003	8.07577
ENSCPOP00000002148	pep:novel scaffold:cavPor3:scaffold_6:963339:978817:-1 gene:ENSCPOG00000002363 transcript:ENSCPOT00000002396	K137	1	22	1003	2.19342
ENSCPOP00000002148	pep:novel scaffold:cavPor3:scaffold_6:963339:978817:-1 gene:ENSCPOG00000002363 transcript:ENSCPOT00000002396	K344	1	6	1003	0.598205
ENSCPOP00000002148	pep:novel scaffold:cavPor3:scaffold_6:963339:978817:-1 gene:ENSCPOG00000002363 transcript:ENSCPOT00000002396	K75	1	3	1003	0.299103
ENSCPOP00000002148	pep:novel scaffold:cavPor3:scaffold_6:963339:978817:-1 gene:ENSCPOG00000002363 transcript:ENSCPOT00000002396	K611	1	3	1003	0.299103
ENSCPOP00000002148	pep:novel scaffold:cavPor3:scaffold_6:963339:978817:-1 gene:ENSCPOG00000002363 transcript:ENSCPOT00000002396	K290	1	1	1003	0.0997009
ENSCPOP00000002161	pep:novel scaffold:cavPor3:scaffold_38:420506:451489:1 gene:ENSCPOG00000002377 transcript:ENSCPOT00000002410	K134	1	2	2	100	Yes
ENSCPOP00000002163	pep:novel scaffold:cavPor3:scaffold_35:2144216:2160932:1 gene:ENSCPOG00000002379 transcript:ENSCPOT00000002412	K66	1	6	6	100	Yes
ENSCPOP00000002239	pep:novel scaffold:cavPor3:scaffold_89:5793790:5800034:-1 gene:ENSCPOG00000002458 transcript:ENSCPOT00000002491	K242	0.99	2	2	100	Yes
ENSCPOP00000002376	pep:novel scaffold:cavPor3:scaffold_9:46900000:46907434:1 gene:ENSCPOG00000002615 transcript:ENSCPOT00000002649	K110	1	7	8	87.5	Yes
ENSCPOP00000002376	pep:novel scaffold:cavPor3:scaffold_9:46900000:46907434:1 gene:ENSCPOG00000002615 transcript:ENSCPOT00000002649	K187	1	1	8	12.5
ENSCPOP00000002392	pep:known scaffold:cavPor3:scaffold_66:2406002:2408736:-1 gene:ENSCPOG00000002632 transcript:ENSCPOT00000002666	K77	1	48	58	82.7586	Yes
ENSCPOP00000002392	pep:known scaffold:cavPor3:scaffold_66:2406002:2408736:-1 gene:ENSCPOG00000002632 transcript:ENSCPOT00000002666	K132	1	9	58	15.5172
ENSCPOP00000002392	pep:known scaffold:cavPor3:scaffold_66:2406002:2408736:-1 gene:ENSCPOG00000002632 transcript:ENSCPOT00000002666	K134	0	1	58	1.72414
ENSCPOP00000002482	pep:novel scaffold:cavPor3:scaffold_24:2027391:2029063:-1 gene:ENSCPOG00000002733 transcript:ENSCPOT00000002767	K121	1	95	160	59.375	Yes
ENSCPOP00000002482	pep:novel scaffold:cavPor3:scaffold_24:2027391:2029063:-1 gene:ENSCPOG00000002733 transcript:ENSCPOT00000002767	K74	1	59	160	36.875
ENSCPOP00000002482	pep:novel scaffold:cavPor3:scaffold_24:2027391:2029063:-1 gene:ENSCPOG00000002733 transcript:ENSCPOT00000002767	K57	1	6	160	3.75
ENSCPOP00000002485	pep:novel scaffold:cavPor3:scaffold_5:24468474:24685345:-1 gene:ENSCPOG00000002735 transcript:ENSCPOT00000002770	K56	1	94	129	72.8682	Yes
ENSCPOP00000002485	pep:novel scaffold:cavPor3:scaffold_5:24468474:24685345:-1 gene:ENSCPOG00000002735 transcript:ENSCPOT00000002770	K57	0.5	34	129	26.3566
ENSCPOP00000002485	pep:novel scaffold:cavPor3:scaffold_5:24468474:24685345:-1 gene:ENSCPOG00000002735 transcript:ENSCPOT00000002770	K149	1	1	129	0.775194
ENSCPOP00000002487	pep:novel scaffold:cavPor3:scaffold_115:1976162:2030121:1 gene:ENSCPOG00000002739 transcript:ENSCPOT00000002774	K464	1	3	5	60	Yes
ENSCPOP00000002487	pep:novel scaffold:cavPor3:scaffold_115:1976162:2030121:1 gene:ENSCPOG00000002739 transcript:ENSCPOT00000002774	K510	1	1	5	20
ENSCPOP00000002487	pep:novel scaffold:cavPor3:scaffold_115:1976162:2030121:1 gene:ENSCPOG00000002739 transcript:ENSCPOT00000002774	K533	1	1	5	20
ENSCPOP00000002499	pep:novel scaffold:cavPor3:scaffold_15:23732017:23745973:1 gene:ENSCPOG00000002752 transcript:ENSCPOT00000002787	K74	1	25	48	52.0833	Yes
ENSCPOP00000002499	pep:novel scaffold:cavPor3:scaffold_15:23732017:23745973:1 gene:ENSCPOG00000002752 transcript:ENSCPOT00000002787	K31	1	23	48	47.9167
ENSCPOP00000002669	pep:novel scaffold:cavPor3:scaffold_132:641754:644280:-1 gene:ENSCPOG00000002938 transcript:ENSCPOT00000002975	K68	1	26	26	100	Yes
ENSCPOP00000002733	pep:novel scaffold:cavPor3:scaffold_37:5976417:6004088:1 gene:ENSCPOG00000003017 transcript:ENSCPOT00000003056	K54	1	541	822	65.8151	Yes
ENSCPOP00000002733	pep:novel scaffold:cavPor3:scaffold_37:5976417:6004088:1 gene:ENSCPOG00000003017 transcript:ENSCPOT00000003056	K48	1	126	822	15.3285
ENSCPOP00000002733	pep:novel scaffold:cavPor3:scaffold_37:5976417:6004088:1 gene:ENSCPOG00000003017 transcript:ENSCPOT00000003056	K57	1	88	822	10.7056
ENSCPOP00000002733	pep:novel scaffold:cavPor3:scaffold_37:5976417:6004088:1 gene:ENSCPOG00000003017 transcript:ENSCPOT00000003056	K105	1	32	822	3.89294
ENSCPOP00000002733	pep:novel scaffold:cavPor3:scaffold_37:5976417:6004088:1 gene:ENSCPOG00000003017 transcript:ENSCPOT00000003056	K66	1	26	822	3.16302
ENSCPOP00000002733	pep:novel scaffold:cavPor3:scaffold_37:5976417:6004088:1 gene:ENSCPOG00000003017 transcript:ENSCPOT00000003056	K192	1	6	822	0.729927
ENSCPOP00000002733	pep:novel scaffold:cavPor3:scaffold_37:5976417:6004088:1 gene:ENSCPOG00000003017 transcript:ENSCPOT00000003056	K93	1	3	822	0.364964
ENSCPOP00000002739	pep:novel scaffold:cavPor3:scaffold_79:6044181:6048145:-1 gene:ENSCPOG00000003025 transcript:ENSCPOT00000003064	K289	0	1	1	100	Yes
ENSCPOP00000002782	pep:known scaffold:cavPor3:scaffold_47:631721:647024:-1 gene:ENSCPOG00000003072 transcript:ENSCPOT00000003114	K184	1	82	215	38.1395	Yes
ENSCPOP00000002782	pep:known scaffold:cavPor3:scaffold_47:631721:647024:-1 gene:ENSCPOG00000003072 transcript:ENSCPOT00000003114	K305	1	18	215	8.37209
ENSCPOP00000002782	pep:known scaffold:cavPor3:scaffold_47:631721:647024:-1 gene:ENSCPOG00000003072 transcript:ENSCPOT00000003114	K383	1	15	215	6.97674
ENSCPOP00000002782	pep:known scaffold:cavPor3:scaffold_47:631721:647024:-1 gene:ENSCPOG00000003072 transcript:ENSCPOT00000003114	K396	1	13	215	6.04651
ENSCPOP00000002782	pep:known scaffold:cavPor3:scaffold_47:631721:647024:-1 gene:ENSCPOG00000003072 transcript:ENSCPOT00000003114	K229	1	11	215	5.11628
ENSCPOP00000002782	pep:known scaffold:cavPor3:scaffold_47:631721:647024:-1 gene:ENSCPOG00000003072 transcript:ENSCPOT00000003114	K375	1	10	215	4.65116
ENSCPOP00000002782	pep:known scaffold:cavPor3:scaffold_47:631721:647024:-1 gene:ENSCPOG00000003072 transcript:ENSCPOT00000003114	K236	1	10	215	4.65116
ENSCPOP00000002782	pep:known scaffold:cavPor3:scaffold_47:631721:647024:-1 gene:ENSCPOG00000003072 transcript:ENSCPOT00000003114	K212	1	10	215	4.65116
ENSCPOP00000002782	pep:known scaffold:cavPor3:scaffold_47:631721:647024:-1 gene:ENSCPOG00000003072 transcript:ENSCPOT00000003114	K380	1	7	215	3.25581
ENSCPOP00000002782	pep:known scaffold:cavPor3:scaffold_47:631721:647024:-1 gene:ENSCPOG00000003072 transcript:ENSCPOT00000003114	K210	1	4	215	1.86047
ENSCPOP00000002782	pep:known scaffold:cavPor3:scaffold_47:631721:647024:-1 gene:ENSCPOG00000003072 transcript:ENSCPOT00000003114	K65	1	4	215	1.86047
ENSCPOP00000002782	pep:known scaffold:cavPor3:scaffold_47:631721:647024:-1 gene:ENSCPOG00000003072 transcript:ENSCPOT00000003114	K286	1	4	215	1.86047
ENSCPOP00000002782	pep:known scaffold:cavPor3:scaffold_47:631721:647024:-1 gene:ENSCPOG00000003072 transcript:ENSCPOT00000003114	K246	1	3	215	1.39535
ENSCPOP00000002782	pep:known scaffold:cavPor3:scaffold_47:631721:647024:-1 gene:ENSCPOG00000003072 transcript:ENSCPOT00000003114	K205	1	3	215	1.39535
ENSCPOP00000002782	pep:known scaffold:cavPor3:scaffold_47:631721:647024:-1 gene:ENSCPOG00000003072 transcript:ENSCPOT00000003114	K490	1	3	215	1.39535
ENSCPOP00000002782	pep:known scaffold:cavPor3:scaffold_47:631721:647024:-1 gene:ENSCPOG00000003072 transcript:ENSCPOT00000003114	K580	1	3	215	1.39535
ENSCPOP00000002782	pep:known scaffold:cavPor3:scaffold_47:631721:647024:-1 gene:ENSCPOG00000003072 transcript:ENSCPOT00000003114	K198	1	3	215	1.39535
ENSCPOP00000002782	pep:known scaffold:cavPor3:scaffold_47:631721:647024:-1 gene:ENSCPOG00000003072 transcript:ENSCPOT00000003114	K130	1	3	215	1.39535
ENSCPOP00000002782	pep:known scaffold:cavPor3:scaffold_47:631721:647024:-1 gene:ENSCPOG00000003072 transcript:ENSCPOT00000003114	K569	1	2	215	0.930233
ENSCPOP00000002782	pep:known scaffold:cavPor3:scaffold_47:631721:647024:-1 gene:ENSCPOG00000003072 transcript:ENSCPOT00000003114	K88	1	2	215	0.930233
ENSCPOP00000002782	pep:known scaffold:cavPor3:scaffold_47:631721:647024:-1 gene:ENSCPOG00000003072 transcript:ENSCPOT00000003114	K298	0.93	1	215	0.465116
ENSCPOP00000002782	pep:known scaffold:cavPor3:scaffold_47:631721:647024:-1 gene:ENSCPOG00000003072 transcript:ENSCPOT00000003114	K453	1	1	215	0.465116
ENSCPOP00000002782	pep:known scaffold:cavPor3:scaffold_47:631721:647024:-1 gene:ENSCPOG00000003072 transcript:ENSCPOT00000003114	K117	0.47	1	215	0.465116
ENSCPOP00000002782	pep:known scaffold:cavPor3:scaffold_47:631721:647024:-1 gene:ENSCPOG00000003072 transcript:ENSCPOT00000003114	K421	1	1	215	0.465116
ENSCPOP00000002782	pep:known scaffold:cavPor3:scaffold_47:631721:647024:-1 gene:ENSCPOG00000003072 transcript:ENSCPOT00000003114	K300	0.99	1	215	0.465116
ENSCPOP00000002798	pep:novel scaffold:cavPor3:scaffold_93:4442955:4503564:1 gene:ENSCPOG00000003091 transcript:ENSCPOT00000003134	K87	1	3	3	100	Yes
ENSCPOP00000002806	pep:novel scaffold:cavPor3:scaffold_92:3897135:3958678:-1 gene:ENSCPOG00000003099 transcript:ENSCPOT00000003142	K396	1	28	37	75.6757	Yes
ENSCPOP00000002806	pep:novel scaffold:cavPor3:scaffold_92:3897135:3958678:-1 gene:ENSCPOG00000003099 transcript:ENSCPOT00000003142	K323	1	6	37	16.2162
ENSCPOP00000002806	pep:novel scaffold:cavPor3:scaffold_92:3897135:3958678:-1 gene:ENSCPOG00000003099 transcript:ENSCPOT00000003142	K460	1	3	37	8.10811
ENSCPOP00000002955	pep:novel scaffold:cavPor3:scaffold_0:56092696:56095526:1 gene:ENSCPOG00000003265 transcript:ENSCPOT00000003308	K43	1	1	1	100	Yes
ENSCPOP00000002972	pep:novel scaffold:cavPor3:scaffold_7:3441640:3460244:-1 gene:ENSCPOG00000003289 transcript:ENSCPOT00000003332	K75	1	2	3	66.6667	Yes
ENSCPOP00000002972	pep:novel scaffold:cavPor3:scaffold_7:3441640:3460244:-1 gene:ENSCPOG00000003289 transcript:ENSCPOT00000003332	K78	1	1	3	33.3333
ENSCPOP00000003038	pep:novel scaffold:cavPor3:scaffold_66:2440059:2494038:-1 gene:ENSCPOG00000003361 transcript:ENSCPOT00000003404	K970	1	87	99	87.8788	Yes
ENSCPOP00000003038	pep:novel scaffold:cavPor3:scaffold_66:2440059:2494038:-1 gene:ENSCPOG00000003361 transcript:ENSCPOT00000003404	K401	1	9	99	9.09091
ENSCPOP00000003038	pep:novel scaffold:cavPor3:scaffold_66:2440059:2494038:-1 gene:ENSCPOG00000003361 transcript:ENSCPOT00000003404	K276	1	3	99	3.0303
ENSCPOP00000003406	pep:novel scaffold:cavPor3:scaffold_150:1140885:1148178:-1 gene:ENSCPOG00000003772 transcript:ENSCPOT00000003816	K112	1	32	55	58.1818	Yes
ENSCPOP00000003406	pep:novel scaffold:cavPor3:scaffold_150:1140885:1148178:-1 gene:ENSCPOG00000003772 transcript:ENSCPOT00000003816	K41	1	23	55	41.8182
ENSCPOP00000003507	pep:novel scaffold:cavPor3:scaffold_15:30616156:30620414:-1 gene:ENSCPOG00000003887 transcript:ENSCPOT00000003931	K374	1	9	15	60	Yes
ENSCPOP00000003507	pep:novel scaffold:cavPor3:scaffold_15:30616156:30620414:-1 gene:ENSCPOG00000003887 transcript:ENSCPOT00000003931	K371	1	6	15	40
ENSCPOP00000003526	pep:novel scaffold:cavPor3:scaffold_3:11859161:11992100:1 gene:ENSCPOG00000003907 transcript:ENSCPOT00000003951	K1333	1	3	8	37.5	Yes
ENSCPOP00000003526	pep:novel scaffold:cavPor3:scaffold_3:11859161:11992100:1 gene:ENSCPOG00000003907 transcript:ENSCPOT00000003951	K1853	1	1	8	12.5
ENSCPOP00000003526	pep:novel scaffold:cavPor3:scaffold_3:11859161:11992100:1 gene:ENSCPOG00000003907 transcript:ENSCPOT00000003951	K1864	1	1	8	12.5
ENSCPOP00000003526	pep:novel scaffold:cavPor3:scaffold_3:11859161:11992100:1 gene:ENSCPOG00000003907 transcript:ENSCPOT00000003951	K9775	1	1	8	12.5
ENSCPOP00000003526	pep:novel scaffold:cavPor3:scaffold_3:11859161:11992100:1 gene:ENSCPOG00000003907 transcript:ENSCPOT00000003951	K7965	1	1	8	12.5
ENSCPOP00000003526	pep:novel scaffold:cavPor3:scaffold_3:11859161:11992100:1 gene:ENSCPOG00000003907 transcript:ENSCPOT00000003951	K1760	1	1	8	12.5
ENSCPOP00000003559	pep:novel scaffold:cavPor3:scaffold_1:22436542:22446404:-1 gene:ENSCPOG00000003941 transcript:ENSCPOT00000003985	K276	1	140	214	65.4206	Yes
ENSCPOP00000003559	pep:novel scaffold:cavPor3:scaffold_1:22436542:22446404:-1 gene:ENSCPOG00000003941 transcript:ENSCPOT00000003985	K344	1	61	214	28.5047
ENSCPOP00000003559	pep:novel scaffold:cavPor3:scaffold_1:22436542:22446404:-1 gene:ENSCPOG00000003941 transcript:ENSCPOT00000003985	K403	1	11	214	5.14019
ENSCPOP00000003559	pep:novel scaffold:cavPor3:scaffold_1:22436542:22446404:-1 gene:ENSCPOG00000003941 transcript:ENSCPOT00000003985	K137	0.38	1	214	0.46729
ENSCPOP00000003559	pep:novel scaffold:cavPor3:scaffold_1:22436542:22446404:-1 gene:ENSCPOG00000003941 transcript:ENSCPOT00000003985	K230	1	1	214	0.46729
ENSCPOP00000003618	pep:novel scaffold:cavPor3:scaffold_25:11029309:11082036:-1 gene:ENSCPOG00000004010 transcript:ENSCPOT00000004054	K130	1	6	6	100	Yes
ENSCPOP00000003628	pep:novel scaffold:cavPor3:scaffold_76:181419:184289:1 gene:ENSCPOG00000004022 transcript:ENSCPOT00000004066	K90	1	354	1164	30.4124	Yes
ENSCPOP00000003628	pep:novel scaffold:cavPor3:scaffold_76:181419:184289:1 gene:ENSCPOG00000004022 transcript:ENSCPOT00000004066	K112	1	226	1164	19.4158
ENSCPOP00000003628	pep:novel scaffold:cavPor3:scaffold_76:181419:184289:1 gene:ENSCPOG00000004022 transcript:ENSCPOT00000004066	K80	1	210	1164	18.0412
ENSCPOP00000003628	pep:novel scaffold:cavPor3:scaffold_76:181419:184289:1 gene:ENSCPOG00000004022 transcript:ENSCPOT00000004066	K67	1	183	1164	15.7216
ENSCPOP00000003628	pep:novel scaffold:cavPor3:scaffold_76:181419:184289:1 gene:ENSCPOG00000004022 transcript:ENSCPOT00000004066	K73	1	77	1164	6.61512
ENSCPOP00000003628	pep:novel scaffold:cavPor3:scaffold_76:181419:184289:1 gene:ENSCPOG00000004022 transcript:ENSCPOT00000004066	K104	1	56	1164	4.811
ENSCPOP00000003628	pep:novel scaffold:cavPor3:scaffold_76:181419:184289:1 gene:ENSCPOG00000004022 transcript:ENSCPOT00000004066	K53	1	26	1164	2.23368
ENSCPOP00000003628	pep:novel scaffold:cavPor3:scaffold_76:181419:184289:1 gene:ENSCPOG00000004022 transcript:ENSCPOT00000004066	K68	1	10	1164	0.859107
ENSCPOP00000003628	pep:novel scaffold:cavPor3:scaffold_76:181419:184289:1 gene:ENSCPOG00000004022 transcript:ENSCPOT00000004066	K43	1	6	1164	0.515464
ENSCPOP00000003628	pep:novel scaffold:cavPor3:scaffold_76:181419:184289:1 gene:ENSCPOG00000004022 transcript:ENSCPOT00000004066	K144	1	6	1164	0.515464
ENSCPOP00000003628	pep:novel scaffold:cavPor3:scaffold_76:181419:184289:1 gene:ENSCPOG00000004022 transcript:ENSCPOT00000004066	K94	1	5	1164	0.429553
ENSCPOP00000003628	pep:novel scaffold:cavPor3:scaffold_76:181419:184289:1 gene:ENSCPOG00000004022 transcript:ENSCPOT00000004066	K58	1	3	1164	0.257732
ENSCPOP00000003628	pep:novel scaffold:cavPor3:scaffold_76:181419:184289:1 gene:ENSCPOG00000004022 transcript:ENSCPOT00000004066	K143	0.8	2	1164	0.171821
ENSCPOP00000003669	pep:novel scaffold:cavPor3:scaffold_4:46683612:46685713:-1 gene:ENSCPOG00000004067 transcript:ENSCPOT00000004112	K179	1	24	24	100	Yes
ENSCPOP00000003760	pep:novel scaffold:cavPor3:scaffold_19:25400692:25403895:1 gene:ENSCPOG00000004169 transcript:ENSCPOT00000004214	K597	1	14	25	56	Yes
ENSCPOP00000003760	pep:novel scaffold:cavPor3:scaffold_19:25400692:25403895:1 gene:ENSCPOG00000004169 transcript:ENSCPOT00000004214	K56	1	9	25	36
ENSCPOP00000003760	pep:novel scaffold:cavPor3:scaffold_19:25400692:25403895:1 gene:ENSCPOG00000004169 transcript:ENSCPOT00000004214	K507	1	1	25	4
ENSCPOP00000003760	pep:novel scaffold:cavPor3:scaffold_19:25400692:25403895:1 gene:ENSCPOG00000004169 transcript:ENSCPOT00000004214	K583	0.84	1	25	4
ENSCPOP00000003780	pep:novel scaffold:cavPor3:scaffold_45:1694457:1741597:1 gene:ENSCPOG00000004192 transcript:ENSCPOT00000004237	K434	1	1	1	100	Yes
ENSCPOP00000003855	pep:novel scaffold:cavPor3:scaffold_8:23795660:23804749:-1 gene:ENSCPOG00000004273 transcript:ENSCPOT00000004318	K111	1	529	701	75.4636	Yes
ENSCPOP00000003855	pep:novel scaffold:cavPor3:scaffold_8:23795660:23804749:-1 gene:ENSCPOG00000004273 transcript:ENSCPOT00000004318	K85	1	110	701	15.6919
ENSCPOP00000003855	pep:novel scaffold:cavPor3:scaffold_8:23795660:23804749:-1 gene:ENSCPOG00000004273 transcript:ENSCPOT00000004318	K163	1	25	701	3.56633
ENSCPOP00000003855	pep:novel scaffold:cavPor3:scaffold_8:23795660:23804749:-1 gene:ENSCPOG00000004273 transcript:ENSCPOT00000004318	K248	1	21	701	2.99572
ENSCPOP00000003855	pep:novel scaffold:cavPor3:scaffold_8:23795660:23804749:-1 gene:ENSCPOG00000004273 transcript:ENSCPOT00000004318	K138	1	12	701	1.71184
ENSCPOP00000003855	pep:novel scaffold:cavPor3:scaffold_8:23795660:23804749:-1 gene:ENSCPOG00000004273 transcript:ENSCPOT00000004318	K447	1	4	701	0.570613
ENSCPOP00000004099	pep:novel scaffold:cavPor3:scaffold_22:24631501:24644577:-1 gene:ENSCPOG00000004549 transcript:ENSCPOT00000004598	K71	1	4	4	100	Yes
ENSCPOP00000004106	pep:novel scaffold:cavPor3:scaffold_66:3157470:3175899:1 gene:ENSCPOG00000004556 transcript:ENSCPOT00000004605	K74	1	2	2	100	Yes
ENSCPOP00000004119	pep:novel scaffold:cavPor3:scaffold_7:35044434:35064153:1 gene:ENSCPOG00000004569 transcript:ENSCPOT00000004618	K510	1	86	100	86	Yes
ENSCPOP00000004119	pep:novel scaffold:cavPor3:scaffold_7:35044434:35064153:1 gene:ENSCPOG00000004569 transcript:ENSCPOT00000004618	K357	1	11	100	11
ENSCPOP00000004119	pep:novel scaffold:cavPor3:scaffold_7:35044434:35064153:1 gene:ENSCPOG00000004569 transcript:ENSCPOT00000004618	K285	0	1	100	1
ENSCPOP00000004119	pep:novel scaffold:cavPor3:scaffold_7:35044434:35064153:1 gene:ENSCPOG00000004569 transcript:ENSCPOT00000004618	K259	1	1	100	1
ENSCPOP00000004119	pep:novel scaffold:cavPor3:scaffold_7:35044434:35064153:1 gene:ENSCPOG00000004569 transcript:ENSCPOT00000004618	K284	1	1	100	1
ENSCPOP00000004235	pep:novel scaffold:cavPor3:scaffold_52:7715794:7721305:1 gene:ENSCPOG00000004703 transcript:ENSCPOT00000004753	K99	1	125	186	67.2043	Yes
ENSCPOP00000004235	pep:novel scaffold:cavPor3:scaffold_52:7715794:7721305:1 gene:ENSCPOG00000004703 transcript:ENSCPOT00000004753	K105	1	32	186	17.2043
ENSCPOP00000004235	pep:novel scaffold:cavPor3:scaffold_52:7715794:7721305:1 gene:ENSCPOG00000004703 transcript:ENSCPOT00000004753	K94	1	20	186	10.7527
ENSCPOP00000004235	pep:novel scaffold:cavPor3:scaffold_52:7715794:7721305:1 gene:ENSCPOG00000004703 transcript:ENSCPOT00000004753	K41	1	5	186	2.68817
ENSCPOP00000004235	pep:novel scaffold:cavPor3:scaffold_52:7715794:7721305:1 gene:ENSCPOG00000004703 transcript:ENSCPOT00000004753	K46	1	4	186	2.15054
ENSCPOP00000004239	pep:novel scaffold:cavPor3:scaffold_193:313917:314517:-1 gene:ENSCPOG00000004707 transcript:ENSCPOT00000004757	K24	1	289	699	41.3448	Yes
ENSCPOP00000004239	pep:novel scaffold:cavPor3:scaffold_193:313917:314517:-1 gene:ENSCPOG00000004707 transcript:ENSCPOT00000004757	K19	1	253	699	36.1946
ENSCPOP00000004239	pep:novel scaffold:cavPor3:scaffold_193:313917:314517:-1 gene:ENSCPOG00000004707 transcript:ENSCPOT00000004757	K15	1	70	699	10.0143
ENSCPOP00000004239	pep:novel scaffold:cavPor3:scaffold_193:313917:314517:-1 gene:ENSCPOG00000004707 transcript:ENSCPOT00000004757	K10	1	70	699	10.0143
ENSCPOP00000004239	pep:novel scaffold:cavPor3:scaffold_193:313917:314517:-1 gene:ENSCPOG00000004707 transcript:ENSCPOT00000004757	K37	1	7	699	1.00143
ENSCPOP00000004239	pep:novel scaffold:cavPor3:scaffold_193:313917:314517:-1 gene:ENSCPOG00000004707 transcript:ENSCPOT00000004757	K28	1	7	699	1.00143
ENSCPOP00000004239	pep:novel scaffold:cavPor3:scaffold_193:313917:314517:-1 gene:ENSCPOG00000004707 transcript:ENSCPOT00000004757	K80	1	3	699	0.429185
ENSCPOP00000004266	pep:novel scaffold:cavPor3:scaffold_14:15735485:15768669:1 gene:ENSCPOG00000004734 transcript:ENSCPOT00000004784	K181	1	489	1367	35.7718	Yes
ENSCPOP00000004266	pep:novel scaffold:cavPor3:scaffold_14:15735485:15768669:1 gene:ENSCPOG00000004734 transcript:ENSCPOT00000004784	K81	1	291	1367	21.2875
ENSCPOP00000004266	pep:novel scaffold:cavPor3:scaffold_14:15735485:15768669:1 gene:ENSCPOG00000004734 transcript:ENSCPOT00000004784	K173	1	241	1367	17.6298
ENSCPOP00000004266	pep:novel scaffold:cavPor3:scaffold_14:15735485:15768669:1 gene:ENSCPOG00000004734 transcript:ENSCPOT00000004784	K25	1	147	1367	10.7535
ENSCPOP00000004266	pep:novel scaffold:cavPor3:scaffold_14:15735485:15768669:1 gene:ENSCPOG00000004734 transcript:ENSCPOT00000004784	K234	1	108	1367	7.90051
ENSCPOP00000004266	pep:novel scaffold:cavPor3:scaffold_14:15735485:15768669:1 gene:ENSCPOG00000004734 transcript:ENSCPOT00000004784	K340	1	51	1367	3.7308
ENSCPOP00000004266	pep:novel scaffold:cavPor3:scaffold_14:15735485:15768669:1 gene:ENSCPOG00000004734 transcript:ENSCPOT00000004784	K270	1	26	1367	1.90198
ENSCPOP00000004266	pep:novel scaffold:cavPor3:scaffold_14:15735485:15768669:1 gene:ENSCPOG00000004734 transcript:ENSCPOT00000004784	K38	1	12	1367	0.877835
ENSCPOP00000004266	pep:novel scaffold:cavPor3:scaffold_14:15735485:15768669:1 gene:ENSCPOG00000004734 transcript:ENSCPOT00000004784	K312	1	1	1367	0.0731529
ENSCPOP00000004266	pep:novel scaffold:cavPor3:scaffold_14:15735485:15768669:1 gene:ENSCPOG00000004734 transcript:ENSCPOT00000004784	K240	1	1	1367	0.0731529
ENSCPOP00000004280	pep:novel scaffold:cavPor3:scaffold_0:24974944:25000060:-1 gene:ENSCPOG00000004748 transcript:ENSCPOT00000004799	K211	1	12	32	37.5	Yes
ENSCPOP00000004280	pep:novel scaffold:cavPor3:scaffold_0:24974944:25000060:-1 gene:ENSCPOG00000004748 transcript:ENSCPOT00000004799	K241	1	11	32	34.375
ENSCPOP00000004280	pep:novel scaffold:cavPor3:scaffold_0:24974944:25000060:-1 gene:ENSCPOG00000004748 transcript:ENSCPOT00000004799	K78	1	8	32	25
ENSCPOP00000004280	pep:novel scaffold:cavPor3:scaffold_0:24974944:25000060:-1 gene:ENSCPOG00000004748 transcript:ENSCPOT00000004799	K114	1	1	32	3.125
ENSCPOP00000004382	pep:known scaffold:cavPor3:scaffold_85:1756656:1785432:-1 gene:ENSCPOG00000004869 transcript:ENSCPOT00000004921	K251	1	4	7	57.1429	Yes
ENSCPOP00000004382	pep:known scaffold:cavPor3:scaffold_85:1756656:1785432:-1 gene:ENSCPOG00000004869 transcript:ENSCPOT00000004921	K90	1	3	7	42.8571
ENSCPOP00000004489	pep:novel scaffold:cavPor3:scaffold_4:23698843:23800983:-1 gene:ENSCPOG00000004987 transcript:ENSCPOT00000005041	K1555	1	56	248	22.5806	Yes
ENSCPOP00000004489	pep:novel scaffold:cavPor3:scaffold_4:23698843:23800983:-1 gene:ENSCPOG00000004987 transcript:ENSCPOT00000005041	K1557	1	56	248	22.5806
ENSCPOP00000004489	pep:novel scaffold:cavPor3:scaffold_4:23698843:23800983:-1 gene:ENSCPOG00000004987 transcript:ENSCPOT00000005041	K1552	1	56	248	22.5806
ENSCPOP00000004489	pep:novel scaffold:cavPor3:scaffold_4:23698843:23800983:-1 gene:ENSCPOG00000004987 transcript:ENSCPOT00000005041	K1551	1	53	248	21.371
ENSCPOP00000004489	pep:novel scaffold:cavPor3:scaffold_4:23698843:23800983:-1 gene:ENSCPOG00000004987 transcript:ENSCPOT00000005041	K994	1	24	248	9.67742
ENSCPOP00000004489	pep:novel scaffold:cavPor3:scaffold_4:23698843:23800983:-1 gene:ENSCPOG00000004987 transcript:ENSCPOT00000005041	K1196	1	3	248	1.20968
ENSCPOP00000004508	pep:novel scaffold:cavPor3:scaffold_61:10015177:10017367:-1 gene:ENSCPOG00000005008 transcript:ENSCPOT00000005062	K256	1	15	15	100	Yes
ENSCPOP00000004647	pep:novel scaffold:cavPor3:scaffold_62:5469429:5497388:1 gene:ENSCPOG00000005166 transcript:ENSCPOT00000005221	K488	1	69	75	92	Yes
ENSCPOP00000004647	pep:novel scaffold:cavPor3:scaffold_62:5469429:5497388:1 gene:ENSCPOG00000005166 transcript:ENSCPOT00000005221	K512	1	3	75	4
ENSCPOP00000004647	pep:novel scaffold:cavPor3:scaffold_62:5469429:5497388:1 gene:ENSCPOG00000005166 transcript:ENSCPOT00000005221	K530	1	3	75	4
ENSCPOP00000004741	pep:novel scaffold:cavPor3:scaffold_81:392114:418960:1 gene:ENSCPOG00000005272 transcript:ENSCPOT00000005329	K370	1	16	36	44.4444	Yes
ENSCPOP00000004741	pep:novel scaffold:cavPor3:scaffold_81:392114:418960:1 gene:ENSCPOG00000005272 transcript:ENSCPOT00000005329	K620	1	12	36	33.3333
ENSCPOP00000004741	pep:novel scaffold:cavPor3:scaffold_81:392114:418960:1 gene:ENSCPOG00000005272 transcript:ENSCPOT00000005329	K63	1	8	36	22.2222
ENSCPOP00000004744	pep:novel scaffold:cavPor3:scaffold_36:9147038:9150518:-1 gene:ENSCPOG00000005275 transcript:ENSCPOT00000005332	K92	1	173	540	32.037	Yes
ENSCPOP00000004744	pep:novel scaffold:cavPor3:scaffold_36:9147038:9150518:-1 gene:ENSCPOG00000005275 transcript:ENSCPOT00000005332	K199	1	97	540	17.963
ENSCPOP00000004744	pep:novel scaffold:cavPor3:scaffold_36:9147038:9150518:-1 gene:ENSCPOG00000005275 transcript:ENSCPOT00000005332	K96	1	86	540	15.9259
ENSCPOP00000004744	pep:novel scaffold:cavPor3:scaffold_36:9147038:9150518:-1 gene:ENSCPOG00000005275 transcript:ENSCPOT00000005332	K166	1	67	540	12.4074
ENSCPOP00000004744	pep:novel scaffold:cavPor3:scaffold_36:9147038:9150518:-1 gene:ENSCPOG00000005275 transcript:ENSCPOT00000005332	K268	1	38	540	7.03704
ENSCPOP00000004744	pep:novel scaffold:cavPor3:scaffold_36:9147038:9150518:-1 gene:ENSCPOG00000005275 transcript:ENSCPOT00000005332	K272	1	22	540	4.07407
ENSCPOP00000004744	pep:novel scaffold:cavPor3:scaffold_36:9147038:9150518:-1 gene:ENSCPOG00000005275 transcript:ENSCPOT00000005332	K163	1	16	540	2.96296
ENSCPOP00000004744	pep:novel scaffold:cavPor3:scaffold_36:9147038:9150518:-1 gene:ENSCPOG00000005275 transcript:ENSCPOT00000005332	K23	1	15	540	2.77778
ENSCPOP00000004744	pep:novel scaffold:cavPor3:scaffold_36:9147038:9150518:-1 gene:ENSCPOG00000005275 transcript:ENSCPOT00000005332	K94	0.97	12	540	2.22222
ENSCPOP00000004744	pep:novel scaffold:cavPor3:scaffold_36:9147038:9150518:-1 gene:ENSCPOG00000005275 transcript:ENSCPOT00000005332	K147	1	9	540	1.66667
ENSCPOP00000004744	pep:novel scaffold:cavPor3:scaffold_36:9147038:9150518:-1 gene:ENSCPOG00000005275 transcript:ENSCPOT00000005332	K252	1	2	540	0.37037
ENSCPOP00000004744	pep:novel scaffold:cavPor3:scaffold_36:9147038:9150518:-1 gene:ENSCPOG00000005275 transcript:ENSCPOT00000005332	K10	1	2	540	0.37037
ENSCPOP00000004744	pep:novel scaffold:cavPor3:scaffold_36:9147038:9150518:-1 gene:ENSCPOG00000005275 transcript:ENSCPOT00000005332	K107	1	1	540	0.185185
ENSCPOP00000004776	pep:novel scaffold:cavPor3:scaffold_31:12905617:12932904:-1 gene:ENSCPOG00000005312 transcript:ENSCPOT00000005369	K410	1	374	1983	18.8603	Yes
ENSCPOP00000004776	pep:novel scaffold:cavPor3:scaffold_31:12905617:12932904:-1 gene:ENSCPOG00000005312 transcript:ENSCPOT00000005369	K122	1	332	1983	16.7423
ENSCPOP00000004776	pep:novel scaffold:cavPor3:scaffold_31:12905617:12932904:-1 gene:ENSCPOG00000005312 transcript:ENSCPOT00000005369	K420	1	304	1983	15.3303
ENSCPOP00000004776	pep:novel scaffold:cavPor3:scaffold_31:12905617:12932904:-1 gene:ENSCPOG00000005312 transcript:ENSCPOT00000005369	K143	1	217	1983	10.943
ENSCPOP00000004776	pep:novel scaffold:cavPor3:scaffold_31:12905617:12932904:-1 gene:ENSCPOG00000005312 transcript:ENSCPOT00000005369	K267	1	211	1983	10.6404
ENSCPOP00000004776	pep:novel scaffold:cavPor3:scaffold_31:12905617:12932904:-1 gene:ENSCPOG00000005312 transcript:ENSCPOT00000005369	K104	1	151	1983	7.61473
ENSCPOP00000004776	pep:novel scaffold:cavPor3:scaffold_31:12905617:12932904:-1 gene:ENSCPOG00000005312 transcript:ENSCPOT00000005369	K273	1	138	1983	6.95915
ENSCPOP00000004776	pep:novel scaffold:cavPor3:scaffold_31:12905617:12932904:-1 gene:ENSCPOG00000005312 transcript:ENSCPOT00000005369	K146	1	84	1983	4.23601
ENSCPOP00000004776	pep:novel scaffold:cavPor3:scaffold_31:12905617:12932904:-1 gene:ENSCPOG00000005312 transcript:ENSCPOT00000005369	K132	1	62	1983	3.12658
ENSCPOP00000004776	pep:novel scaffold:cavPor3:scaffold_31:12905617:12932904:-1 gene:ENSCPOG00000005312 transcript:ENSCPOT00000005369	K271	1	42	1983	2.118
ENSCPOP00000004776	pep:novel scaffold:cavPor3:scaffold_31:12905617:12932904:-1 gene:ENSCPOG00000005312 transcript:ENSCPOT00000005369	K346	1	29	1983	1.46243
ENSCPOP00000004776	pep:novel scaffold:cavPor3:scaffold_31:12905617:12932904:-1 gene:ENSCPOG00000005312 transcript:ENSCPOT00000005369	K66	1	19	1983	0.958144
ENSCPOP00000004776	pep:novel scaffold:cavPor3:scaffold_31:12905617:12932904:-1 gene:ENSCPOG00000005312 transcript:ENSCPOT00000005369	K155	1	18	1983	0.907716
ENSCPOP00000004776	pep:novel scaffold:cavPor3:scaffold_31:12905617:12932904:-1 gene:ENSCPOG00000005312 transcript:ENSCPOT00000005369	K277	1	1	1983	0.0504286
ENSCPOP00000004776	pep:novel scaffold:cavPor3:scaffold_31:12905617:12932904:-1 gene:ENSCPOG00000005312 transcript:ENSCPOT00000005369	K166	1	1	1983	0.0504286
ENSCPOP00000004877	pep:novel scaffold:cavPor3:scaffold_18:8160066:8185370:1 gene:ENSCPOG00000005418 transcript:ENSCPOT00000005476	K73	1	257	476	53.9916	Yes
ENSCPOP00000004877	pep:novel scaffold:cavPor3:scaffold_18:8160066:8185370:1 gene:ENSCPOG00000005418 transcript:ENSCPOT00000005476	K189	1	111	476	23.3193
ENSCPOP00000004877	pep:novel scaffold:cavPor3:scaffold_18:8160066:8185370:1 gene:ENSCPOG00000005418 transcript:ENSCPOT00000005476	K202	1	77	476	16.1765
ENSCPOP00000004877	pep:novel scaffold:cavPor3:scaffold_18:8160066:8185370:1 gene:ENSCPOG00000005418 transcript:ENSCPOT00000005476	K475	1	9	476	1.89076
ENSCPOP00000004877	pep:novel scaffold:cavPor3:scaffold_18:8160066:8185370:1 gene:ENSCPOG00000005418 transcript:ENSCPOT00000005476	K278	1	4	476	0.840336
ENSCPOP00000004877	pep:novel scaffold:cavPor3:scaffold_18:8160066:8185370:1 gene:ENSCPOG00000005418 transcript:ENSCPOT00000005476	K299	0.99	4	476	0.840336
ENSCPOP00000004877	pep:novel scaffold:cavPor3:scaffold_18:8160066:8185370:1 gene:ENSCPOG00000005418 transcript:ENSCPOT00000005476	K182	1	3	476	0.630252
ENSCPOP00000004877	pep:novel scaffold:cavPor3:scaffold_18:8160066:8185370:1 gene:ENSCPOG00000005418 transcript:ENSCPOT00000005476	K191	0	3	476	0.630252
ENSCPOP00000004877	pep:novel scaffold:cavPor3:scaffold_18:8160066:8185370:1 gene:ENSCPOG00000005418 transcript:ENSCPOT00000005476	K112	1	3	476	0.630252
ENSCPOP00000004877	pep:novel scaffold:cavPor3:scaffold_18:8160066:8185370:1 gene:ENSCPOG00000005418 transcript:ENSCPOT00000005476	K294	0.2	2	476	0.420168
ENSCPOP00000004877	pep:novel scaffold:cavPor3:scaffold_18:8160066:8185370:1 gene:ENSCPOG00000005418 transcript:ENSCPOT00000005476	K349	1	1	476	0.210084
ENSCPOP00000004877	pep:novel scaffold:cavPor3:scaffold_18:8160066:8185370:1 gene:ENSCPOG00000005418 transcript:ENSCPOT00000005476	K273	1	1	476	0.210084
ENSCPOP00000004877	pep:novel scaffold:cavPor3:scaffold_18:8160066:8185370:1 gene:ENSCPOG00000005418 transcript:ENSCPOT00000005476	K333	1	1	476	0.210084
ENSCPOP00000004894	pep:novel scaffold:cavPor3:scaffold_28:24703957:24757470:1 gene:ENSCPOG00000005438 transcript:ENSCPOT00000005496	K1521	1	430	1112	38.6691	Yes
ENSCPOP00000004894	pep:novel scaffold:cavPor3:scaffold_28:24703957:24757470:1 gene:ENSCPOG00000005438 transcript:ENSCPOT00000005496	K1525	1	319	1112	28.6871
ENSCPOP00000004894	pep:novel scaffold:cavPor3:scaffold_28:24703957:24757470:1 gene:ENSCPOG00000005438 transcript:ENSCPOT00000005496	K1528	1	109	1112	9.80216
ENSCPOP00000004894	pep:novel scaffold:cavPor3:scaffold_28:24703957:24757470:1 gene:ENSCPOG00000005438 transcript:ENSCPOT00000005496	K1537	1	59	1112	5.30576
ENSCPOP00000004894	pep:novel scaffold:cavPor3:scaffold_28:24703957:24757470:1 gene:ENSCPOG00000005438 transcript:ENSCPOT00000005496	K1534	1	54	1112	4.85612
ENSCPOP00000004894	pep:novel scaffold:cavPor3:scaffold_28:24703957:24757470:1 gene:ENSCPOG00000005438 transcript:ENSCPOT00000005496	K1539	1	47	1112	4.22662
ENSCPOP00000004894	pep:novel scaffold:cavPor3:scaffold_28:24703957:24757470:1 gene:ENSCPOG00000005438 transcript:ENSCPOT00000005496	K1529	1	39	1112	3.50719
ENSCPOP00000004894	pep:novel scaffold:cavPor3:scaffold_28:24703957:24757470:1 gene:ENSCPOG00000005438 transcript:ENSCPOT00000005496	K1533	1	36	1112	3.23741
ENSCPOP00000004894	pep:novel scaffold:cavPor3:scaffold_28:24703957:24757470:1 gene:ENSCPOG00000005438 transcript:ENSCPOT00000005496	K1530	1	19	1112	1.70863
ENSCPOP00000005002	pep:novel scaffold:cavPor3:scaffold_13:39857037:39884518:-1 gene:ENSCPOG00000005555 transcript:ENSCPOT00000005614	K85	1	112	170	65.8824	Yes
ENSCPOP00000005002	pep:novel scaffold:cavPor3:scaffold_13:39857037:39884518:-1 gene:ENSCPOG00000005555 transcript:ENSCPOT00000005614	K451	1	48	170	28.2353
ENSCPOP00000005002	pep:novel scaffold:cavPor3:scaffold_13:39857037:39884518:-1 gene:ENSCPOG00000005555 transcript:ENSCPOT00000005614	K312	1	6	170	3.52941
ENSCPOP00000005002	pep:novel scaffold:cavPor3:scaffold_13:39857037:39884518:-1 gene:ENSCPOG00000005555 transcript:ENSCPOT00000005614	K468	0.88	3	170	1.76471
ENSCPOP00000005002	pep:novel scaffold:cavPor3:scaffold_13:39857037:39884518:-1 gene:ENSCPOG00000005555 transcript:ENSCPOT00000005614	K471	0.73	1	170	0.588235
ENSCPOP00000005241	pep:known scaffold:cavPor3:scaffold_25:24439713:24448145:1 gene:ENSCPOG00000005812 transcript:ENSCPOT00000005874	K89	1	10	10	100	Yes
ENSCPOP00000005365	pep:novel scaffold:cavPor3:scaffold_18:8112613:8154587:-1 gene:ENSCPOG00000005945 transcript:ENSCPOT00000006008	K728	1	247	1097	22.516	Yes
ENSCPOP00000005365	pep:novel scaffold:cavPor3:scaffold_18:8112613:8154587:-1 gene:ENSCPOG00000005945 transcript:ENSCPOT00000006008	K129	1	155	1097	14.1294
ENSCPOP00000005365	pep:novel scaffold:cavPor3:scaffold_18:8112613:8154587:-1 gene:ENSCPOG00000005945 transcript:ENSCPOT00000006008	K60	1	134	1097	12.2151
ENSCPOP00000005365	pep:novel scaffold:cavPor3:scaffold_18:8112613:8154587:-1 gene:ENSCPOG00000005945 transcript:ENSCPOT00000006008	K406	1	77	1097	7.01914
ENSCPOP00000005365	pep:novel scaffold:cavPor3:scaffold_18:8112613:8154587:-1 gene:ENSCPOG00000005945 transcript:ENSCPOT00000006008	K353	1	72	1097	6.56335
ENSCPOP00000005365	pep:novel scaffold:cavPor3:scaffold_18:8112613:8154587:-1 gene:ENSCPOG00000005945 transcript:ENSCPOT00000006008	K664	1	63	1097	5.74294
ENSCPOP00000005365	pep:novel scaffold:cavPor3:scaffold_18:8112613:8154587:-1 gene:ENSCPOG00000005945 transcript:ENSCPOT00000006008	K505	1	55	1097	5.01367
ENSCPOP00000005365	pep:novel scaffold:cavPor3:scaffold_18:8112613:8154587:-1 gene:ENSCPOG00000005945 transcript:ENSCPOT00000006008	K46	1	52	1097	4.7402
ENSCPOP00000005365	pep:novel scaffold:cavPor3:scaffold_18:8112613:8154587:-1 gene:ENSCPOG00000005945 transcript:ENSCPOT00000006008	K460	1	42	1097	3.82862
ENSCPOP00000005365	pep:novel scaffold:cavPor3:scaffold_18:8112613:8154587:-1 gene:ENSCPOG00000005945 transcript:ENSCPOT00000006008	K303	1	26	1097	2.3701
ENSCPOP00000005365	pep:novel scaffold:cavPor3:scaffold_18:8112613:8154587:-1 gene:ENSCPOG00000005945 transcript:ENSCPOT00000006008	K289	1	24	1097	2.18778
ENSCPOP00000005365	pep:novel scaffold:cavPor3:scaffold_18:8112613:8154587:-1 gene:ENSCPOG00000005945 transcript:ENSCPOT00000006008	K285	1	23	1097	2.09663
ENSCPOP00000005365	pep:novel scaffold:cavPor3:scaffold_18:8112613:8154587:-1 gene:ENSCPOG00000005945 transcript:ENSCPOT00000006008	K326	1	20	1097	1.82315
ENSCPOP00000005365	pep:novel scaffold:cavPor3:scaffold_18:8112613:8154587:-1 gene:ENSCPOG00000005945 transcript:ENSCPOT00000006008	K540	1	19	1097	1.732
ENSCPOP00000005365	pep:novel scaffold:cavPor3:scaffold_18:8112613:8154587:-1 gene:ENSCPOG00000005945 transcript:ENSCPOT00000006008	K359	1	15	1097	1.36737
ENSCPOP00000005365	pep:novel scaffold:cavPor3:scaffold_18:8112613:8154587:-1 gene:ENSCPOG00000005945 transcript:ENSCPOT00000006008	K390	1	14	1097	1.27621
ENSCPOP00000005365	pep:novel scaffold:cavPor3:scaffold_18:8112613:8154587:-1 gene:ENSCPOG00000005945 transcript:ENSCPOT00000006008	K351	0.5	13	1097	1.18505
ENSCPOP00000005365	pep:novel scaffold:cavPor3:scaffold_18:8112613:8154587:-1 gene:ENSCPOG00000005945 transcript:ENSCPOT00000006008	K295	1	13	1097	1.18505
ENSCPOP00000005365	pep:novel scaffold:cavPor3:scaffold_18:8112613:8154587:-1 gene:ENSCPOG00000005945 transcript:ENSCPOT00000006008	K569	1	8	1097	0.729262
ENSCPOP00000005365	pep:novel scaffold:cavPor3:scaffold_18:8112613:8154587:-1 gene:ENSCPOG00000005945 transcript:ENSCPOT00000006008	K411	1	6	1097	0.546946
ENSCPOP00000005365	pep:novel scaffold:cavPor3:scaffold_18:8112613:8154587:-1 gene:ENSCPOG00000005945 transcript:ENSCPOT00000006008	K493	1	6	1097	0.546946
ENSCPOP00000005365	pep:novel scaffold:cavPor3:scaffold_18:8112613:8154587:-1 gene:ENSCPOG00000005945 transcript:ENSCPOT00000006008	K230	1	6	1097	0.546946
ENSCPOP00000005365	pep:novel scaffold:cavPor3:scaffold_18:8112613:8154587:-1 gene:ENSCPOG00000005945 transcript:ENSCPOT00000006008	K570	1	5	1097	0.455789
ENSCPOP00000005365	pep:novel scaffold:cavPor3:scaffold_18:8112613:8154587:-1 gene:ENSCPOG00000005945 transcript:ENSCPOT00000006008	K309	0.81	1	1097	0.0911577
ENSCPOP00000005365	pep:novel scaffold:cavPor3:scaffold_18:8112613:8154587:-1 gene:ENSCPOG00000005945 transcript:ENSCPOT00000006008	K166	1	1	1097	0.0911577
ENSCPOP00000005538	pep:novel scaffold:cavPor3:scaffold_72:6798826:6803599:1 gene:ENSCPOG00000006141 transcript:ENSCPOT00000006205	K58	1	11	12	91.6667	Yes
ENSCPOP00000005538	pep:novel scaffold:cavPor3:scaffold_72:6798826:6803599:1 gene:ENSCPOG00000006141 transcript:ENSCPOT00000006205	K263	0.19	1	12	8.33333
ENSCPOP00000005574	pep:novel scaffold:cavPor3:scaffold_98:2603528:2651679:-1 gene:ENSCPOG00000006181 transcript:ENSCPOT00000006245	K49	1	23	26	88.4615	Yes
ENSCPOP00000005574	pep:novel scaffold:cavPor3:scaffold_98:2603528:2651679:-1 gene:ENSCPOG00000006181 transcript:ENSCPOT00000006245	K56	1	3	26	11.5385
ENSCPOP00000005737	pep:novel scaffold:cavPor3:scaffold_13:25062675:25097078:-1 gene:ENSCPOG00000006368 transcript:ENSCPOT00000006433	K39	1	1	2	50	Yes (Tie)
ENSCPOP00000005737	pep:novel scaffold:cavPor3:scaffold_13:25062675:25097078:-1 gene:ENSCPOG00000006368 transcript:ENSCPOT00000006433	K35	1	1	2	50	Yes (Tie)
ENSCPOP00000005768	pep:novel scaffold:cavPor3:scaffold_101:3490897:3515922:-1 gene:ENSCPOG00000006400 transcript:ENSCPOT00000006465	K227	1	591	605	97.686	Yes
ENSCPOP00000005768	pep:novel scaffold:cavPor3:scaffold_101:3490897:3515922:-1 gene:ENSCPOG00000006400 transcript:ENSCPOT00000006465	K157	1	14	605	2.31405
ENSCPOP00000005809	pep:novel scaffold:cavPor3:scaffold_16:18485099:18539975:1 gene:ENSCPOG00000006449 transcript:ENSCPOT00000006514	K44	0.5	7	10	70	Yes
ENSCPOP00000005809	pep:novel scaffold:cavPor3:scaffold_16:18485099:18539975:1 gene:ENSCPOG00000006449 transcript:ENSCPOT00000006514	K666	1	1	10	10
ENSCPOP00000005809	pep:novel scaffold:cavPor3:scaffold_16:18485099:18539975:1 gene:ENSCPOG00000006449 transcript:ENSCPOT00000006514	K888	1	1	10	10
ENSCPOP00000005809	pep:novel scaffold:cavPor3:scaffold_16:18485099:18539975:1 gene:ENSCPOG00000006449 transcript:ENSCPOT00000006514	K41	1	1	10	10
ENSCPOP00000005853	pep:novel scaffold:cavPor3:scaffold_19:28931012:28940008:-1 gene:ENSCPOG00000006501 transcript:ENSCPOT00000006566	K305	1	1	1	100	Yes
ENSCPOP00000005984	pep:novel scaffold:cavPor3:scaffold_42:8074962:8079844:1 gene:ENSCPOG00000006645 transcript:ENSCPOT00000006711	K104	1	10	30	33.3333	Yes (Tie)
ENSCPOP00000005984	pep:novel scaffold:cavPor3:scaffold_42:8074962:8079844:1 gene:ENSCPOG00000006645 transcript:ENSCPOT00000006711	K375	1	10	30	33.3333	Yes (Tie)
ENSCPOP00000005984	pep:novel scaffold:cavPor3:scaffold_42:8074962:8079844:1 gene:ENSCPOG00000006645 transcript:ENSCPOT00000006711	K36	1	6	30	20
ENSCPOP00000005984	pep:novel scaffold:cavPor3:scaffold_42:8074962:8079844:1 gene:ENSCPOG00000006645 transcript:ENSCPOT00000006711	K66	1	3	30	10
ENSCPOP00000005984	pep:novel scaffold:cavPor3:scaffold_42:8074962:8079844:1 gene:ENSCPOG00000006645 transcript:ENSCPOT00000006711	K64	1	1	30	3.33333
ENSCPOP00000006024	pep:novel scaffold:cavPor3:scaffold_4:38435711:38461669:1 gene:ENSCPOG00000006687 transcript:ENSCPOT00000006755	K359	1	284	754	37.6658	Yes
ENSCPOP00000006024	pep:novel scaffold:cavPor3:scaffold_4:38435711:38461669:1 gene:ENSCPOG00000006687 transcript:ENSCPOT00000006755	K162	1	215	754	28.5146
ENSCPOP00000006024	pep:novel scaffold:cavPor3:scaffold_4:38435711:38461669:1 gene:ENSCPOG00000006687 transcript:ENSCPOT00000006755	K199	1	205	754	27.1883
ENSCPOP00000006024	pep:novel scaffold:cavPor3:scaffold_4:38435711:38461669:1 gene:ENSCPOG00000006687 transcript:ENSCPOT00000006755	K66	1	19	754	2.51989
ENSCPOP00000006024	pep:novel scaffold:cavPor3:scaffold_4:38435711:38461669:1 gene:ENSCPOG00000006687 transcript:ENSCPOT00000006755	K92	1	8	754	1.06101
ENSCPOP00000006024	pep:novel scaffold:cavPor3:scaffold_4:38435711:38461669:1 gene:ENSCPOG00000006687 transcript:ENSCPOT00000006755	K352	1	8	754	1.06101
ENSCPOP00000006024	pep:novel scaffold:cavPor3:scaffold_4:38435711:38461669:1 gene:ENSCPOG00000006687 transcript:ENSCPOT00000006755	K42	1	8	754	1.06101
ENSCPOP00000006024	pep:novel scaffold:cavPor3:scaffold_4:38435711:38461669:1 gene:ENSCPOG00000006687 transcript:ENSCPOT00000006755	K98	1	6	754	0.795756
ENSCPOP00000006024	pep:novel scaffold:cavPor3:scaffold_4:38435711:38461669:1 gene:ENSCPOG00000006687 transcript:ENSCPOT00000006755	K250	1	1	754	0.132626
ENSCPOP00000006048	pep:novel scaffold:cavPor3:scaffold_0:56808126:56813926:-1 gene:ENSCPOG00000006713 transcript:ENSCPOT00000006781	K354	1	53	77	68.8312	Yes
ENSCPOP00000006048	pep:novel scaffold:cavPor3:scaffold_0:56808126:56813926:-1 gene:ENSCPOG00000006713 transcript:ENSCPOT00000006781	K336	1	16	77	20.7792
ENSCPOP00000006048	pep:novel scaffold:cavPor3:scaffold_0:56808126:56813926:-1 gene:ENSCPOG00000006713 transcript:ENSCPOT00000006781	K347	1	8	77	10.3896
ENSCPOP00000006110	pep:novel scaffold:cavPor3:scaffold_133:482874:494940:-1 gene:ENSCPOG00000006779 transcript:ENSCPOT00000006848	K43	1	19	19	100	Yes
ENSCPOP00000006169	pep:novel scaffold:cavPor3:scaffold_1:31134238:31141657:1 gene:ENSCPOG00000006844 transcript:ENSCPOT00000006913	K100	1	43	45	95.5556	Yes
ENSCPOP00000006169	pep:novel scaffold:cavPor3:scaffold_1:31134238:31141657:1 gene:ENSCPOG00000006844 transcript:ENSCPOT00000006913	K5	1	1	45	2.22222
ENSCPOP00000006169	pep:novel scaffold:cavPor3:scaffold_1:31134238:31141657:1 gene:ENSCPOG00000006844 transcript:ENSCPOT00000006913	K39	1	1	45	2.22222
ENSCPOP00000006188	pep:novel scaffold:cavPor3:scaffold_140:2258615:2264853:-1 gene:ENSCPOG00000006864 transcript:ENSCPOT00000006933	K43	1	31	94	32.9787	Yes
ENSCPOP00000006188	pep:novel scaffold:cavPor3:scaffold_140:2258615:2264853:-1 gene:ENSCPOG00000006864 transcript:ENSCPOT00000006933	K146	1	21	94	22.3404
ENSCPOP00000006188	pep:novel scaffold:cavPor3:scaffold_140:2258615:2264853:-1 gene:ENSCPOG00000006864 transcript:ENSCPOT00000006933	K51	1	18	94	19.1489
ENSCPOP00000006188	pep:novel scaffold:cavPor3:scaffold_140:2258615:2264853:-1 gene:ENSCPOG00000006864 transcript:ENSCPOT00000006933	K35	1	13	94	13.8298
ENSCPOP00000006188	pep:novel scaffold:cavPor3:scaffold_140:2258615:2264853:-1 gene:ENSCPOG00000006864 transcript:ENSCPOT00000006933	K134	1	8	94	8.51064
ENSCPOP00000006188	pep:novel scaffold:cavPor3:scaffold_140:2258615:2264853:-1 gene:ENSCPOG00000006864 transcript:ENSCPOT00000006933	K46	1	2	94	2.12766
ENSCPOP00000006188	pep:novel scaffold:cavPor3:scaffold_140:2258615:2264853:-1 gene:ENSCPOG00000006864 transcript:ENSCPOT00000006933	K63	1	1	94	1.06383
ENSCPOP00000006214	pep:novel scaffold:cavPor3:scaffold_148:1877596:1883892:1 gene:ENSCPOG00000006890 transcript:ENSCPOT00000006959	K206	1	4	4	100	Yes
ENSCPOP00000006354	pep:known scaffold:cavPor3:scaffold_13:17431200:17450183:1 gene:ENSCPOG00000007045 transcript:ENSCPOT00000007114	K413	1	120	800	15	Yes
ENSCPOP00000006354	pep:known scaffold:cavPor3:scaffold_13:17431200:17450183:1 gene:ENSCPOG00000007045 transcript:ENSCPOT00000007114	K1814	1	87	800	10.875
ENSCPOP00000006354	pep:known scaffold:cavPor3:scaffold_13:17431200:17450183:1 gene:ENSCPOG00000007045 transcript:ENSCPOT00000007114	K1531	1	70	800	8.75
ENSCPOP00000006354	pep:known scaffold:cavPor3:scaffold_13:17431200:17450183:1 gene:ENSCPOG00000007045 transcript:ENSCPOT00000007114	K1528	1	66	800	8.25
ENSCPOP00000006354	pep:known scaffold:cavPor3:scaffold_13:17431200:17450183:1 gene:ENSCPOG00000007045 transcript:ENSCPOT00000007114	K1579	1	61	800	7.625
ENSCPOP00000006354	pep:known scaffold:cavPor3:scaffold_13:17431200:17450183:1 gene:ENSCPOG00000007045 transcript:ENSCPOT00000007114	K951	1	54	800	6.75
ENSCPOP00000006354	pep:known scaffold:cavPor3:scaffold_13:17431200:17450183:1 gene:ENSCPOG00000007045 transcript:ENSCPOT00000007114	K1641	1	36	800	4.5						0
ENSCPOP00000006354	pep:known scaffold:cavPor3:scaffold_13:17431200:17450183:1 gene:ENSCPOG00000007045 transcript:ENSCPOT00000007114	K865	1	34	800	4.25
ENSCPOP00000006354	pep:known scaffold:cavPor3:scaffold_13:17431200:17450183:1 gene:ENSCPOG00000007045 transcript:ENSCPOT00000007114	K1444	0.99	31	800	3.875
ENSCPOP00000006354	pep:known scaffold:cavPor3:scaffold_13:17431200:17450183:1 gene:ENSCPOG00000007045 transcript:ENSCPOT00000007114	K1042	0.97	18	800	2.25
ENSCPOP00000006354	pep:known scaffold:cavPor3:scaffold_13:17431200:17450183:1 gene:ENSCPOG00000007045 transcript:ENSCPOT00000007114	K1316	1	16	800	2
ENSCPOP00000006354	pep:known scaffold:cavPor3:scaffold_13:17431200:17450183:1 gene:ENSCPOG00000007045 transcript:ENSCPOT00000007114	K1459	1	15	800	1.875
ENSCPOP00000006354	pep:known scaffold:cavPor3:scaffold_13:17431200:17450183:1 gene:ENSCPOG00000007045 transcript:ENSCPOT00000007114	K853	1	15	800	1.875
ENSCPOP00000006354	pep:known scaffold:cavPor3:scaffold_13:17431200:17450183:1 gene:ENSCPOG00000007045 transcript:ENSCPOT00000007114	K744	1	15	800	1.875
ENSCPOP00000006354	pep:known scaffold:cavPor3:scaffold_13:17431200:17450183:1 gene:ENSCPOG00000007045 transcript:ENSCPOT00000007114	K657	1	15	800	1.875
ENSCPOP00000006354	pep:known scaffold:cavPor3:scaffold_13:17431200:17450183:1 gene:ENSCPOG00000007045 transcript:ENSCPOT00000007114	K1279	1	12	800	1.5
ENSCPOP00000006354	pep:known scaffold:cavPor3:scaffold_13:17431200:17450183:1 gene:ENSCPOG00000007045 transcript:ENSCPOT00000007114	K1499	1	12	800	1.5
ENSCPOP00000006354	pep:known scaffold:cavPor3:scaffold_13:17431200:17450183:1 gene:ENSCPOG00000007045 transcript:ENSCPOT00000007114	K968	1	9	800	1.125
ENSCPOP00000006354	pep:known scaffold:cavPor3:scaffold_13:17431200:17450183:1 gene:ENSCPOG00000007045 transcript:ENSCPOT00000007114	K1587	1	9	800	1.125
ENSCPOP00000006354	pep:known scaffold:cavPor3:scaffold_13:17431200:17450183:1 gene:ENSCPOG00000007045 transcript:ENSCPOT00000007114	K1374	1	8	800	1
ENSCPOP00000006354	pep:known scaffold:cavPor3:scaffold_13:17431200:17450183:1 gene:ENSCPOG00000007045 transcript:ENSCPOT00000007114	K565	1	7	800	0.875
ENSCPOP00000006354	pep:known scaffold:cavPor3:scaffold_13:17431200:17450183:1 gene:ENSCPOG00000007045 transcript:ENSCPOT00000007114	K1294	1	7	800	0.875
ENSCPOP00000006354	pep:known scaffold:cavPor3:scaffold_13:17431200:17450183:1 gene:ENSCPOG00000007045 transcript:ENSCPOT00000007114	K43	1	7	800	0.875
ENSCPOP00000006354	pep:known scaffold:cavPor3:scaffold_13:17431200:17450183:1 gene:ENSCPOG00000007045 transcript:ENSCPOT00000007114	K939	1	6	800	0.75
ENSCPOP00000006354	pep:known scaffold:cavPor3:scaffold_13:17431200:17450183:1 gene:ENSCPOG00000007045 transcript:ENSCPOT00000007114	K1870	1	6	800	0.75
ENSCPOP00000006354	pep:known scaffold:cavPor3:scaffold_13:17431200:17450183:1 gene:ENSCPOG00000007045 transcript:ENSCPOT00000007114	K1354	1	6	800	0.75
ENSCPOP00000006354	pep:known scaffold:cavPor3:scaffold_13:17431200:17450183:1 gene:ENSCPOG00000007045 transcript:ENSCPOT00000007114	K1791	1	5	800	0.625
ENSCPOP00000006354	pep:known scaffold:cavPor3:scaffold_13:17431200:17450183:1 gene:ENSCPOG00000007045 transcript:ENSCPOT00000007114	K860	1	5	800	0.625
ENSCPOP00000006354	pep:known scaffold:cavPor3:scaffold_13:17431200:17450183:1 gene:ENSCPOG00000007045 transcript:ENSCPOT00000007114	K67	1	5	800	0.625
ENSCPOP00000006354	pep:known scaffold:cavPor3:scaffold_13:17431200:17450183:1 gene:ENSCPOG00000007045 transcript:ENSCPOT00000007114	K1026	1	5	800	0.625
ENSCPOP00000006354	pep:known scaffold:cavPor3:scaffold_13:17431200:17450183:1 gene:ENSCPOG00000007045 transcript:ENSCPOT00000007114	K1106	1	5	800	0.625
ENSCPOP00000006354	pep:known scaffold:cavPor3:scaffold_13:17431200:17450183:1 gene:ENSCPOG00000007045 transcript:ENSCPOT00000007114	K278	1	4	800	0.5
ENSCPOP00000006354	pep:known scaffold:cavPor3:scaffold_13:17431200:17450183:1 gene:ENSCPOG00000007045 transcript:ENSCPOT00000007114	K876	1	4	800	0.5
ENSCPOP00000006354	pep:known scaffold:cavPor3:scaffold_13:17431200:17450183:1 gene:ENSCPOG00000007045 transcript:ENSCPOT00000007114	K1451	1	3	800	0.375
ENSCPOP00000006354	pep:known scaffold:cavPor3:scaffold_13:17431200:17450183:1 gene:ENSCPOG00000007045 transcript:ENSCPOT00000007114	K1569	1	3	800	0.375
ENSCPOP00000006354	pep:known scaffold:cavPor3:scaffold_13:17431200:17450183:1 gene:ENSCPOG00000007045 transcript:ENSCPOT00000007114	K383	1	3	800	0.375
ENSCPOP00000006354	pep:known scaffold:cavPor3:scaffold_13:17431200:17450183:1 gene:ENSCPOG00000007045 transcript:ENSCPOT00000007114	K1831	1	3	800	0.375
ENSCPOP00000006354	pep:known scaffold:cavPor3:scaffold_13:17431200:17450183:1 gene:ENSCPOG00000007045 transcript:ENSCPOT00000007114	K1727	0.98	2	800	0.25
ENSCPOP00000006354	pep:known scaffold:cavPor3:scaffold_13:17431200:17450183:1 gene:ENSCPOG00000007045 transcript:ENSCPOT00000007114	K940	0	1	800	0.125
ENSCPOP00000006354	pep:known scaffold:cavPor3:scaffold_13:17431200:17450183:1 gene:ENSCPOG00000007045 transcript:ENSCPOT00000007114	K1445	0	1	800	0.125
ENSCPOP00000006354	pep:known scaffold:cavPor3:scaffold_13:17431200:17450183:1 gene:ENSCPOG00000007045 transcript:ENSCPOT00000007114	K1324	1	1	800	0.125
ENSCPOP00000006354	pep:known scaffold:cavPor3:scaffold_13:17431200:17450183:1 gene:ENSCPOG00000007045 transcript:ENSCPOT00000007114	K1930	1	1	800	0.125
ENSCPOP00000006354	pep:known scaffold:cavPor3:scaffold_13:17431200:17450183:1 gene:ENSCPOG00000007045 transcript:ENSCPOT00000007114	K1247	1	1	800	0.125
ENSCPOP00000006354	pep:known scaffold:cavPor3:scaffold_13:17431200:17450183:1 gene:ENSCPOG00000007045 transcript:ENSCPOT00000007114	K757	0.23	1	800	0.125
ENSCPOP00000006354	pep:known scaffold:cavPor3:scaffold_13:17431200:17450183:1 gene:ENSCPOG00000007045 transcript:ENSCPOT00000007114	K434	1	1	800	0.125
ENSCPOP00000006354	pep:known scaffold:cavPor3:scaffold_13:17431200:17450183:1 gene:ENSCPOG00000007045 transcript:ENSCPOT00000007114	K1016	1	1	800	0.125
ENSCPOP00000006354	pep:known scaffold:cavPor3:scaffold_13:17431200:17450183:1 gene:ENSCPOG00000007045 transcript:ENSCPOT00000007114	K246	1	1	800	0.125
ENSCPOP00000006354	pep:known scaffold:cavPor3:scaffold_13:17431200:17450183:1 gene:ENSCPOG00000007045 transcript:ENSCPOT00000007114	K1173	1	1	800	0.125
ENSCPOP00000006354	pep:known scaffold:cavPor3:scaffold_13:17431200:17450183:1 gene:ENSCPOG00000007045 transcript:ENSCPOT00000007114	K405	0.28	1	800	0.125
ENSCPOP00000006437	pep:novel scaffold:cavPor3:scaffold_28:15032532:15047155:-1 gene:ENSCPOG00000007138 transcript:ENSCPOT00000007209	K82	1	18	20	90	Yes
ENSCPOP00000006437	pep:novel scaffold:cavPor3:scaffold_28:15032532:15047155:-1 gene:ENSCPOG00000007138 transcript:ENSCPOT00000007209	K119	1	2	20	10
ENSCPOP00000006558	pep:novel scaffold:cavPor3:scaffold_10:15096255:15116972:-1 gene:ENSCPOG00000007279 transcript:ENSCPOT00000007351	K221	0.76	2	8	25	Yes
ENSCPOP00000006558	pep:novel scaffold:cavPor3:scaffold_10:15096255:15116972:-1 gene:ENSCPOG00000007279 transcript:ENSCPOT00000007351	K218	1	2	8	25
ENSCPOP00000006558	pep:novel scaffold:cavPor3:scaffold_10:15096255:15116972:-1 gene:ENSCPOG00000007279 transcript:ENSCPOT00000007351	K214	1	2	8	25
ENSCPOP00000006558	pep:novel scaffold:cavPor3:scaffold_10:15096255:15116972:-1 gene:ENSCPOG00000007279 transcript:ENSCPOT00000007351	K113	1	1	8	12.5
ENSCPOP00000006558	pep:novel scaffold:cavPor3:scaffold_10:15096255:15116972:-1 gene:ENSCPOG00000007279 transcript:ENSCPOT00000007351	K119	1	1	8	12.5
ENSCPOP00000006603	pep:novel scaffold:cavPor3:scaffold_51:11246067:11253138:-1 gene:ENSCPOG00000007325 transcript:ENSCPOT00000007397	K138	1	24	31	77.4194	Yes
ENSCPOP00000006603	pep:novel scaffold:cavPor3:scaffold_51:11246067:11253138:-1 gene:ENSCPOG00000007325 transcript:ENSCPOT00000007397	K59	1	5	31	16.129
ENSCPOP00000006603	pep:novel scaffold:cavPor3:scaffold_51:11246067:11253138:-1 gene:ENSCPOG00000007325 transcript:ENSCPOT00000007397	K150	0.97	2	31	6.45161
ENSCPOP00000006706	pep:novel scaffold:cavPor3:scaffold_4:44977426:44980103:-1 gene:ENSCPOG00000007434 transcript:ENSCPOT00000007506	K108	1	32	33	96.9697	Yes
ENSCPOP00000006706	pep:novel scaffold:cavPor3:scaffold_4:44977426:44980103:-1 gene:ENSCPOG00000007434 transcript:ENSCPOT00000007506	K42	1	1	33	3.0303
ENSCPOP00000006718	pep:novel scaffold:cavPor3:scaffold_1:48814222:48823901:1 gene:ENSCPOG00000007447 transcript:ENSCPOT00000007519	K92	1	28	30	93.3333	Yes
ENSCPOP00000006718	pep:novel scaffold:cavPor3:scaffold_1:48814222:48823901:1 gene:ENSCPOG00000007447 transcript:ENSCPOT00000007519	K84	1	2	30	6.66667
ENSCPOP00000006890	pep:novel scaffold:cavPor3:scaffold_52:12354816:12361038:-1 gene:ENSCPOG00000007646 transcript:ENSCPOT00000007719	K206	1	1	1	100	Yes
ENSCPOP00000007144	pep:novel scaffold:cavPor3:scaffold_16:6051811:6427589:1 gene:ENSCPOG00000007936 transcript:ENSCPOT00000008011	K1087	1	3	3	100	Yes
ENSCPOP00000007149	pep:novel scaffold:cavPor3:scaffold_70:6531838:6544665:1 gene:ENSCPOG00000007941 transcript:ENSCPOT00000008016	K110	1	8	8	100	Yes
ENSCPOP00000007508	pep:novel scaffold:cavPor3:scaffold_9:51686367:51727337:-1 gene:ENSCPOG00000008351 transcript:ENSCPOT00000008426	K749	1	35	37	94.5946	Yes
ENSCPOP00000007508	pep:novel scaffold:cavPor3:scaffold_9:51686367:51727337:-1 gene:ENSCPOG00000008351 transcript:ENSCPOT00000008426	K443	1	2	37	5.40541
ENSCPOP00000007615	pep:novel scaffold:cavPor3:scaffold_52:12426960:12436947:-1 gene:ENSCPOG00000008471 transcript:ENSCPOT00000008548	K110	1	1	1	100	Yes
ENSCPOP00000007621	pep:novel scaffold:cavPor3:scaffold_82:2579305:2602204:-1 gene:ENSCPOG00000008479 transcript:ENSCPOT00000008556	K61	1	10	12	83.3333	Yes
ENSCPOP00000007621	pep:novel scaffold:cavPor3:scaffold_82:2579305:2602204:-1 gene:ENSCPOG00000008479 transcript:ENSCPOT00000008556	K209	1	2	12	16.6667
ENSCPOP00000007630	pep:novel scaffold:cavPor3:scaffold_10:34101089:34115102:1 gene:ENSCPOG00000008488 transcript:ENSCPOT00000008565	K180	1	1245	7616	16.3472	Yes
ENSCPOP00000007630	pep:novel scaffold:cavPor3:scaffold_10:34101089:34115102:1 gene:ENSCPOG00000008488 transcript:ENSCPOT00000008565	K106	1	1105	7616	14.5089
ENSCPOP00000007630	pep:novel scaffold:cavPor3:scaffold_10:34101089:34115102:1 gene:ENSCPOG00000008488 transcript:ENSCPOT00000008565	K400	1	615	7616	8.07511
ENSCPOP00000007630	pep:novel scaffold:cavPor3:scaffold_10:34101089:34115102:1 gene:ENSCPOG00000008488 transcript:ENSCPOT00000008565	K413	1	587	7616	7.70746
ENSCPOP00000007630	pep:novel scaffold:cavPor3:scaffold_10:34101089:34115102:1 gene:ENSCPOG00000008488 transcript:ENSCPOT00000008565	K48	1	554	7616	7.27416
ENSCPOP00000007630	pep:novel scaffold:cavPor3:scaffold_10:34101089:34115102:1 gene:ENSCPOG00000008488 transcript:ENSCPOT00000008565	K199	1	545	7616	7.15599
ENSCPOP00000007630	pep:novel scaffold:cavPor3:scaffold_10:34101089:34115102:1 gene:ENSCPOG00000008488 transcript:ENSCPOT00000008565	K282	1	447	7616	5.86922
ENSCPOP00000007630	pep:novel scaffold:cavPor3:scaffold_10:34101089:34115102:1 gene:ENSCPOG00000008488 transcript:ENSCPOT00000008565	K155	1	328	7616	4.30672
ENSCPOP00000007630	pep:novel scaffold:cavPor3:scaffold_10:34101089:34115102:1 gene:ENSCPOG00000008488 transcript:ENSCPOT00000008565	K275	1	324	7616	4.2542
ENSCPOP00000007630	pep:novel scaffold:cavPor3:scaffold_10:34101089:34115102:1 gene:ENSCPOG00000008488 transcript:ENSCPOT00000008565	K384	1	254	7616	3.33508
ENSCPOP00000007630	pep:novel scaffold:cavPor3:scaffold_10:34101089:34115102:1 gene:ENSCPOG00000008488 transcript:ENSCPOT00000008565	K447	1	230	7616	3.01996
ENSCPOP00000007630	pep:novel scaffold:cavPor3:scaffold_10:34101089:34115102:1 gene:ENSCPOG00000008488 transcript:ENSCPOT00000008565	K80	1	228	7616	2.9937
ENSCPOP00000007630	pep:novel scaffold:cavPor3:scaffold_10:34101089:34115102:1 gene:ENSCPOG00000008488 transcript:ENSCPOT00000008565	K272	1	226	7616	2.96744
ENSCPOP00000007630	pep:novel scaffold:cavPor3:scaffold_10:34101089:34115102:1 gene:ENSCPOG00000008488 transcript:ENSCPOT00000008565	K133	1	220	7616	2.88866
ENSCPOP00000007630	pep:novel scaffold:cavPor3:scaffold_10:34101089:34115102:1 gene:ENSCPOG00000008488 transcript:ENSCPOT00000008565	K256	1	176	7616	2.31092
ENSCPOP00000007630	pep:novel scaffold:cavPor3:scaffold_10:34101089:34115102:1 gene:ENSCPOG00000008488 transcript:ENSCPOT00000008565	K166	1	166	7616	2.17962
ENSCPOP00000007630	pep:novel scaffold:cavPor3:scaffold_10:34101089:34115102:1 gene:ENSCPOG00000008488 transcript:ENSCPOT00000008565	K263	1	136	7616	1.78571
ENSCPOP00000007630	pep:novel scaffold:cavPor3:scaffold_10:34101089:34115102:1 gene:ENSCPOG00000008488 transcript:ENSCPOT00000008565	K442	1	129	7616	1.6938
ENSCPOP00000007630	pep:novel scaffold:cavPor3:scaffold_10:34101089:34115102:1 gene:ENSCPOG00000008488 transcript:ENSCPOT00000008565	K280	1	74	7616	0.971639
ENSCPOP00000007630	pep:novel scaffold:cavPor3:scaffold_10:34101089:34115102:1 gene:ENSCPOG00000008488 transcript:ENSCPOT00000008565	K205	0.7	18	7616	0.236345
ENSCPOP00000007630	pep:novel scaffold:cavPor3:scaffold_10:34101089:34115102:1 gene:ENSCPOG00000008488 transcript:ENSCPOT00000008565	K299	1	5	7616	0.0656513
ENSCPOP00000007630	pep:novel scaffold:cavPor3:scaffold_10:34101089:34115102:1 gene:ENSCPOG00000008488 transcript:ENSCPOT00000008565	K67	1	3	7616	0.0393908
ENSCPOP00000007630	pep:novel scaffold:cavPor3:scaffold_10:34101089:34115102:1 gene:ENSCPOG00000008488 transcript:ENSCPOT00000008565	K243	1	1	7616	0.0131303
ENSCPOP00000007694	pep:novel scaffold:cavPor3:scaffold_52:8814777:8838768:-1 gene:ENSCPOG00000008562 transcript:ENSCPOT00000008639	K34	1	7	8	87.5	Yes
ENSCPOP00000007694	pep:novel scaffold:cavPor3:scaffold_52:8814777:8838768:-1 gene:ENSCPOG00000008562 transcript:ENSCPOT00000008639	K366	1	1	8	12.5
ENSCPOP00000007712	pep:novel scaffold:cavPor3:scaffold_70:5344135:5365200:1 gene:ENSCPOG00000008583 transcript:ENSCPOT00000008660	K253	1	2	2	100	Yes
ENSCPOP00000007733	pep:novel scaffold:cavPor3:scaffold_42:5597099:5610003:-1 gene:ENSCPOG00000008604 transcript:ENSCPOT00000008682	K291	1	3	6	50	Yes
ENSCPOP00000007733	pep:novel scaffold:cavPor3:scaffold_42:5597099:5610003:-1 gene:ENSCPOG00000008604 transcript:ENSCPOT00000008682	K812	1	2	6	33.3333
ENSCPOP00000007733	pep:novel scaffold:cavPor3:scaffold_42:5597099:5610003:-1 gene:ENSCPOG00000008604 transcript:ENSCPOT00000008682	K794	1	1	6	16.6667
ENSCPOP00000007755	pep:novel scaffold:cavPor3:scaffold_1:33030942:33052447:-1 gene:ENSCPOG00000008633 transcript:ENSCPOT00000008711	K318	1	9	16	56.25	Yes
ENSCPOP00000007755	pep:novel scaffold:cavPor3:scaffold_1:33030942:33052447:-1 gene:ENSCPOG00000008633 transcript:ENSCPOT00000008711	K290	1	6	16	37.5
ENSCPOP00000007755	pep:novel scaffold:cavPor3:scaffold_1:33030942:33052447:-1 gene:ENSCPOG00000008633 transcript:ENSCPOT00000008711	K396	1	1	16	6.25
ENSCPOP00000007766	pep:novel scaffold:cavPor3:scaffold_25:11776735:11789773:1 gene:ENSCPOG00000008645 transcript:ENSCPOT00000008723	K48	1	2	2	100	Yes
ENSCPOP00000007975	pep:novel scaffold:cavPor3:scaffold_3:2177436:2208713:1 gene:ENSCPOG00000008879 transcript:ENSCPOT00000008959	K353	1	9	20	45	Yes
ENSCPOP00000007975	pep:novel scaffold:cavPor3:scaffold_3:2177436:2208713:1 gene:ENSCPOG00000008879 transcript:ENSCPOT00000008959	K55	1	5	20	25
ENSCPOP00000007975	pep:novel scaffold:cavPor3:scaffold_3:2177436:2208713:1 gene:ENSCPOG00000008879 transcript:ENSCPOT00000008959	K300	1	4	20	20
ENSCPOP00000007975	pep:novel scaffold:cavPor3:scaffold_3:2177436:2208713:1 gene:ENSCPOG00000008879 transcript:ENSCPOT00000008959	K267	1	1	20	5
ENSCPOP00000007975	pep:novel scaffold:cavPor3:scaffold_3:2177436:2208713:1 gene:ENSCPOG00000008879 transcript:ENSCPOT00000008959	K257	1	1	20	5
ENSCPOP00000008014	pep:novel scaffold:cavPor3:scaffold_150:1970861:1992859:-1 gene:ENSCPOG00000008921 transcript:ENSCPOT00000009001	K593	1	496	581	85.3701	Yes
ENSCPOP00000008014	pep:novel scaffold:cavPor3:scaffold_150:1970861:1992859:-1 gene:ENSCPOG00000008921 transcript:ENSCPOT00000009001	K492	1	32	581	5.50775
ENSCPOP00000008014	pep:novel scaffold:cavPor3:scaffold_150:1970861:1992859:-1 gene:ENSCPOG00000008921 transcript:ENSCPOT00000009001	K618	1	18	581	3.09811
ENSCPOP00000008014	pep:novel scaffold:cavPor3:scaffold_150:1970861:1992859:-1 gene:ENSCPOG00000008921 transcript:ENSCPOT00000009001	K407	1	13	581	2.23752
ENSCPOP00000008014	pep:novel scaffold:cavPor3:scaffold_150:1970861:1992859:-1 gene:ENSCPOG00000008921 transcript:ENSCPOT00000009001	K535	1	12	581	2.0654
ENSCPOP00000008014	pep:novel scaffold:cavPor3:scaffold_150:1970861:1992859:-1 gene:ENSCPOG00000008921 transcript:ENSCPOT00000009001	K502	1	6	581	1.0327
ENSCPOP00000008014	pep:novel scaffold:cavPor3:scaffold_150:1970861:1992859:-1 gene:ENSCPOG00000008921 transcript:ENSCPOT00000009001	K483	1	2	581	0.344234
ENSCPOP00000008014	pep:novel scaffold:cavPor3:scaffold_150:1970861:1992859:-1 gene:ENSCPOG00000008921 transcript:ENSCPOT00000009001	K621	1	1	581	0.172117
ENSCPOP00000008014	pep:novel scaffold:cavPor3:scaffold_150:1970861:1992859:-1 gene:ENSCPOG00000008921 transcript:ENSCPOT00000009001	K523	1	1	581	0.172117
ENSCPOP00000008015	pep:known scaffold:cavPor3:scaffold_150:1972806:1991339:-1 gene:ENSCPOG00000008921 transcript:ENSCPOT00000009002	K420	1	35	74	47.2973	Yes
ENSCPOP00000008015	pep:known scaffold:cavPor3:scaffold_150:1972806:1991339:-1 gene:ENSCPOG00000008921 transcript:ENSCPOT00000009002	K363	1	13	74	17.5676
ENSCPOP00000008015	pep:known scaffold:cavPor3:scaffold_150:1972806:1991339:-1 gene:ENSCPOG00000008921 transcript:ENSCPOT00000009002	K490	1	12	74	16.2162
ENSCPOP00000008015	pep:known scaffold:cavPor3:scaffold_150:1972806:1991339:-1 gene:ENSCPOG00000008921 transcript:ENSCPOT00000009002	K447	1	8	74	10.8108
ENSCPOP00000008015	pep:known scaffold:cavPor3:scaffold_150:1972806:1991339:-1 gene:ENSCPOG00000008921 transcript:ENSCPOT00000009002	K457	1	4	74	5.40541
ENSCPOP00000008015	pep:known scaffold:cavPor3:scaffold_150:1972806:1991339:-1 gene:ENSCPOG00000008921 transcript:ENSCPOT00000009002	K438	1	2	74	2.7027
ENSCPOP00000008066	pep:novel scaffold:cavPor3:scaffold_11:4889709:4922479:-1 gene:ENSCPOG00000008978 transcript:ENSCPOT00000009060	K105	1	14	28	50	Yes (Tie)
ENSCPOP00000008066	pep:novel scaffold:cavPor3:scaffold_11:4889709:4922479:-1 gene:ENSCPOG00000008978 transcript:ENSCPOT00000009060	K106	1	14	28	50	Yes (Tie)
ENSCPOP00000008101	pep:novel scaffold:cavPor3:scaffold_5:61120435:61133739:-1 gene:ENSCPOG00000009020 transcript:ENSCPOT00000009103	K166	1	5	9	55.5556	Yes
ENSCPOP00000008101	pep:novel scaffold:cavPor3:scaffold_5:61120435:61133739:-1 gene:ENSCPOG00000009020 transcript:ENSCPOT00000009103	K66	1	3	9	33.3333
ENSCPOP00000008101	pep:novel scaffold:cavPor3:scaffold_5:61120435:61133739:-1 gene:ENSCPOG00000009020 transcript:ENSCPOT00000009103	K135	1	1	9	11.1111
ENSCPOP00000008228	pep:novel scaffold:cavPor3:scaffold_22:23562397:23583692:1 gene:ENSCPOG00000009164 transcript:ENSCPOT00000009247	K406	1	487	2408	20.2243	Yes
ENSCPOP00000008228	pep:novel scaffold:cavPor3:scaffold_22:23562397:23583692:1 gene:ENSCPOG00000009164 transcript:ENSCPOT00000009247	K73	1	471	2408	19.5598
ENSCPOP00000008228	pep:novel scaffold:cavPor3:scaffold_22:23562397:23583692:1 gene:ENSCPOG00000009164 transcript:ENSCPOT00000009247	K311	1	406	2408	16.8605
ENSCPOP00000008228	pep:novel scaffold:cavPor3:scaffold_22:23562397:23583692:1 gene:ENSCPOG00000009164 transcript:ENSCPOT00000009247	K298	1	384	2408	15.9468
ENSCPOP00000008228	pep:novel scaffold:cavPor3:scaffold_22:23562397:23583692:1 gene:ENSCPOG00000009164 transcript:ENSCPOT00000009247	K398	1	147	2408	6.10465
ENSCPOP00000008228	pep:novel scaffold:cavPor3:scaffold_22:23562397:23583692:1 gene:ENSCPOG00000009164 transcript:ENSCPOT00000009247	K229	1	128	2408	5.31561
ENSCPOP00000008228	pep:novel scaffold:cavPor3:scaffold_22:23562397:23583692:1 gene:ENSCPOG00000009164 transcript:ENSCPOT00000009247	K365	1	90	2408	3.73754
ENSCPOP00000008228	pep:novel scaffold:cavPor3:scaffold_22:23562397:23583692:1 gene:ENSCPOG00000009164 transcript:ENSCPOT00000009247	K90	1	68	2408	2.82392
ENSCPOP00000008228	pep:novel scaffold:cavPor3:scaffold_22:23562397:23583692:1 gene:ENSCPOG00000009164 transcript:ENSCPOT00000009247	K347	1	48	2408	1.99336
ENSCPOP00000008228	pep:novel scaffold:cavPor3:scaffold_22:23562397:23583692:1 gene:ENSCPOG00000009164 transcript:ENSCPOT00000009247	K122	1	47	2408	1.95183
ENSCPOP00000008228	pep:novel scaffold:cavPor3:scaffold_22:23562397:23583692:1 gene:ENSCPOG00000009164 transcript:ENSCPOT00000009247	K187	1	45	2408	1.86877
ENSCPOP00000008228	pep:novel scaffold:cavPor3:scaffold_22:23562397:23583692:1 gene:ENSCPOG00000009164 transcript:ENSCPOT00000009247	K304	1	29	2408	1.20432
ENSCPOP00000008228	pep:novel scaffold:cavPor3:scaffold_22:23562397:23583692:1 gene:ENSCPOG00000009164 transcript:ENSCPOT00000009247	K236	1	16	2408	0.664452
ENSCPOP00000008228	pep:novel scaffold:cavPor3:scaffold_22:23562397:23583692:1 gene:ENSCPOG00000009164 transcript:ENSCPOT00000009247	K389	1	12	2408	0.498339
ENSCPOP00000008228	pep:novel scaffold:cavPor3:scaffold_22:23562397:23583692:1 gene:ENSCPOG00000009164 transcript:ENSCPOT00000009247	K161	1	12	2408	0.498339
ENSCPOP00000008228	pep:novel scaffold:cavPor3:scaffold_22:23562397:23583692:1 gene:ENSCPOG00000009164 transcript:ENSCPOT00000009247	K432	1	11	2408	0.456811
ENSCPOP00000008228	pep:novel scaffold:cavPor3:scaffold_22:23562397:23583692:1 gene:ENSCPOG00000009164 transcript:ENSCPOT00000009247	K202	1	3	2408	0.124585
ENSCPOP00000008228	pep:novel scaffold:cavPor3:scaffold_22:23562397:23583692:1 gene:ENSCPOG00000009164 transcript:ENSCPOT00000009247	K82	0.37	3	2408	0.124585
ENSCPOP00000008228	pep:novel scaffold:cavPor3:scaffold_22:23562397:23583692:1 gene:ENSCPOG00000009164 transcript:ENSCPOT00000009247	K107	1	1	2408	0.0415282
ENSCPOP00000008240	pep:novel scaffold:cavPor3:scaffold_6:2945562:2947327:-1 gene:ENSCPOG00000009178 transcript:ENSCPOT00000009261	K75	1	5	5	100	Yes
ENSCPOP00000008332	pep:novel scaffold:cavPor3:scaffold_59:2045699:2060270:1 gene:ENSCPOG00000009280 transcript:ENSCPOT00000009365	K321	1	998	2008	49.7012	Yes
ENSCPOP00000008332	pep:novel scaffold:cavPor3:scaffold_59:2045699:2060270:1 gene:ENSCPOG00000009280 transcript:ENSCPOT00000009365	K77	1	678	2008	33.7649
ENSCPOP00000008332	pep:novel scaffold:cavPor3:scaffold_59:2045699:2060270:1 gene:ENSCPOG00000009280 transcript:ENSCPOT00000009365	K313	1	140	2008	6.97211
ENSCPOP00000008332	pep:novel scaffold:cavPor3:scaffold_59:2045699:2060270:1 gene:ENSCPOG00000009280 transcript:ENSCPOT00000009365	K244	1	78	2008	3.88446
ENSCPOP00000008332	pep:novel scaffold:cavPor3:scaffold_59:2045699:2060270:1 gene:ENSCPOG00000009280 transcript:ENSCPOT00000009365	K83	1	71	2008	3.53586
ENSCPOP00000008332	pep:novel scaffold:cavPor3:scaffold_59:2045699:2060270:1 gene:ENSCPOG00000009280 transcript:ENSCPOT00000009365	K63	1	26	2008	1.29482
ENSCPOP00000008332	pep:novel scaffold:cavPor3:scaffold_59:2045699:2060270:1 gene:ENSCPOG00000009280 transcript:ENSCPOT00000009365	K39	1	12	2008	0.59761
ENSCPOP00000008332	pep:novel scaffold:cavPor3:scaffold_59:2045699:2060270:1 gene:ENSCPOG00000009280 transcript:ENSCPOT00000009365	K336	1	4	2008	0.199203
ENSCPOP00000008332	pep:novel scaffold:cavPor3:scaffold_59:2045699:2060270:1 gene:ENSCPOG00000009280 transcript:ENSCPOT00000009365	K344	0	1	2008	0.0498008
ENSCPOP00000008361	pep:novel scaffold:cavPor3:scaffold_20:18933903:18953714:1 gene:ENSCPOG00000009316 transcript:ENSCPOT00000009401	K268	1	485	1177	41.2065	Yes
ENSCPOP00000008361	pep:novel scaffold:cavPor3:scaffold_20:18933903:18953714:1 gene:ENSCPOG00000009316 transcript:ENSCPOT00000009401	K273	1	367	1177	31.181
ENSCPOP00000008361	pep:novel scaffold:cavPor3:scaffold_20:18933903:18953714:1 gene:ENSCPOG00000009316 transcript:ENSCPOT00000009401	K278	1	274	1177	23.2795
ENSCPOP00000008361	pep:novel scaffold:cavPor3:scaffold_20:18933903:18953714:1 gene:ENSCPOG00000009316 transcript:ENSCPOT00000009401	K274	0.5	36	1177	3.05862
ENSCPOP00000008361	pep:novel scaffold:cavPor3:scaffold_20:18933903:18953714:1 gene:ENSCPOG00000009316 transcript:ENSCPOT00000009401	K308	1	15	1177	1.27443
ENSCPOP00000008445	pep:novel scaffold:cavPor3:scaffold_52:4653664:4667139:1 gene:ENSCPOG00000009404 transcript:ENSCPOT00000009489	K402	1	11	11	100	Yes
ENSCPOP00000008574	pep:novel scaffold:cavPor3:scaffold_143:1575063:1590511:-1 gene:ENSCPOG00000009552 transcript:ENSCPOT00000009638	K108	1	1	1	100	Yes
ENSCPOP00000008626	pep:novel scaffold:cavPor3:scaffold_20:18153323:18165051:1 gene:ENSCPOG00000009610 transcript:ENSCPOT00000009697	K165	1	1	1	100	Yes
ENSCPOP00000008701	pep:novel scaffold:cavPor3:scaffold_2:47513596:47554798:1 gene:ENSCPOG00000009695 transcript:ENSCPOT00000009782	K108	1	5	10	50	Yes
ENSCPOP00000008701	pep:novel scaffold:cavPor3:scaffold_2:47513596:47554798:1 gene:ENSCPOG00000009695 transcript:ENSCPOT00000009782	K116	1	3	10	30
ENSCPOP00000008701	pep:novel scaffold:cavPor3:scaffold_2:47513596:47554798:1 gene:ENSCPOG00000009695 transcript:ENSCPOT00000009782	K434	1	2	10	20
ENSCPOP00000008856	pep:novel scaffold:cavPor3:scaffold_13:43106696:43133822:-1 gene:ENSCPOG00000009871 transcript:ENSCPOT00000009960	K56	1	279	596	46.8121	Yes
ENSCPOP00000008856	pep:novel scaffold:cavPor3:scaffold_13:43106696:43133822:-1 gene:ENSCPOG00000009871 transcript:ENSCPOT00000009960	K297	1	154	596	25.8389
ENSCPOP00000008856	pep:novel scaffold:cavPor3:scaffold_13:43106696:43133822:-1 gene:ENSCPOG00000009871 transcript:ENSCPOT00000009960	K254	1	70	596	11.745
ENSCPOP00000008856	pep:novel scaffold:cavPor3:scaffold_13:43106696:43133822:-1 gene:ENSCPOG00000009871 transcript:ENSCPOT00000009960	K67	1	46	596	7.71812
ENSCPOP00000008856	pep:novel scaffold:cavPor3:scaffold_13:43106696:43133822:-1 gene:ENSCPOG00000009871 transcript:ENSCPOT00000009960	K41	1	39	596	6.54362
ENSCPOP00000008856	pep:novel scaffold:cavPor3:scaffold_13:43106696:43133822:-1 gene:ENSCPOG00000009871 transcript:ENSCPOT00000009960	K333	1	4	596	0.671141
ENSCPOP00000008856	pep:novel scaffold:cavPor3:scaffold_13:43106696:43133822:-1 gene:ENSCPOG00000009871 transcript:ENSCPOT00000009960	K229	1	2	596	0.33557
ENSCPOP00000008856	pep:novel scaffold:cavPor3:scaffold_13:43106696:43133822:-1 gene:ENSCPOG00000009871 transcript:ENSCPOT00000009960	K293	0.03	1	596	0.167785
ENSCPOP00000008856	pep:novel scaffold:cavPor3:scaffold_13:43106696:43133822:-1 gene:ENSCPOG00000009871 transcript:ENSCPOT00000009960	K215	1	1	596	0.167785
ENSCPOP00000009090	pep:novel scaffold:cavPor3:scaffold_13:23919831:23958033:1 gene:ENSCPOG00000010123 transcript:ENSCPOT00000010214	K228	1	2	2	100	Yes
ENSCPOP00000009119	pep:novel scaffold:cavPor3:scaffold_9:6540988:6561102:1 gene:ENSCPOG00000010154 transcript:ENSCPOT00000010247	K44	1	4	5	80	Yes
ENSCPOP00000009119	pep:novel scaffold:cavPor3:scaffold_9:6540988:6561102:1 gene:ENSCPOG00000010154 transcript:ENSCPOT00000010247	K102	1	1	5	20
ENSCPOP00000009167	pep:novel scaffold:cavPor3:scaffold_107:2720121:2755930:1 gene:ENSCPOG00000010206 transcript:ENSCPOT00000010299	K189	1	5	5	100	Yes
ENSCPOP00000009440	pep:novel scaffold:cavPor3:scaffold_80:560729:570896:-1 gene:ENSCPOG00000010512 transcript:ENSCPOT00000010607	K63	1	59	120	49.1667	Yes
ENSCPOP00000009440	pep:novel scaffold:cavPor3:scaffold_80:560729:570896:-1 gene:ENSCPOG00000010512 transcript:ENSCPOT00000010607	K61	1	16	120	13.3333
ENSCPOP00000009440	pep:novel scaffold:cavPor3:scaffold_80:560729:570896:-1 gene:ENSCPOG00000010512 transcript:ENSCPOT00000010607	K15	1	14	120	11.6667
ENSCPOP00000009440	pep:novel scaffold:cavPor3:scaffold_80:560729:570896:-1 gene:ENSCPOG00000010512 transcript:ENSCPOT00000010607	K20	1	12	120	10
ENSCPOP00000009440	pep:novel scaffold:cavPor3:scaffold_80:560729:570896:-1 gene:ENSCPOG00000010512 transcript:ENSCPOT00000010607	K226	1	10	120	8.33333
ENSCPOP00000009440	pep:novel scaffold:cavPor3:scaffold_80:560729:570896:-1 gene:ENSCPOG00000010512 transcript:ENSCPOT00000010607	K115	1	3	120	2.5
ENSCPOP00000009440	pep:novel scaffold:cavPor3:scaffold_80:560729:570896:-1 gene:ENSCPOG00000010512 transcript:ENSCPOT00000010607	K119	1	3	120	2.5
ENSCPOP00000009440	pep:novel scaffold:cavPor3:scaffold_80:560729:570896:-1 gene:ENSCPOG00000010512 transcript:ENSCPOT00000010607	K174	1	2	120	1.66667
ENSCPOP00000009440	pep:novel scaffold:cavPor3:scaffold_80:560729:570896:-1 gene:ENSCPOG00000010512 transcript:ENSCPOT00000010607	K28	1	1	120	0.833333
ENSCPOP00000009450	pep:novel scaffold:cavPor3:scaffold_16:15526444:15534756:-1 gene:ENSCPOG00000010523 transcript:ENSCPOT00000010618	K135	1	130	289	44.9827	Yes
ENSCPOP00000009450	pep:novel scaffold:cavPor3:scaffold_16:15526444:15534756:-1 gene:ENSCPOG00000010523 transcript:ENSCPOT00000010618	K64	1	88	289	30.4498
ENSCPOP00000009450	pep:novel scaffold:cavPor3:scaffold_16:15526444:15534756:-1 gene:ENSCPOG00000010523 transcript:ENSCPOT00000010618	K71	0.84	26	289	8.99654
ENSCPOP00000009450	pep:novel scaffold:cavPor3:scaffold_16:15526444:15534756:-1 gene:ENSCPOG00000010523 transcript:ENSCPOT00000010618	K96	1	19	289	6.57439
ENSCPOP00000009450	pep:novel scaffold:cavPor3:scaffold_16:15526444:15534756:-1 gene:ENSCPOG00000010523 transcript:ENSCPOT00000010618	K69	0.97	8	289	2.76817
ENSCPOP00000009450	pep:novel scaffold:cavPor3:scaffold_16:15526444:15534756:-1 gene:ENSCPOG00000010523 transcript:ENSCPOT00000010618	K36	1	7	289	2.42215
ENSCPOP00000009450	pep:novel scaffold:cavPor3:scaffold_16:15526444:15534756:-1 gene:ENSCPOG00000010523 transcript:ENSCPOT00000010618	K45	1	3	289	1.03806
ENSCPOP00000009450	pep:novel scaffold:cavPor3:scaffold_16:15526444:15534756:-1 gene:ENSCPOG00000010523 transcript:ENSCPOT00000010618	K20	1	3	289	1.03806
ENSCPOP00000009450	pep:novel scaffold:cavPor3:scaffold_16:15526444:15534756:-1 gene:ENSCPOG00000010523 transcript:ENSCPOT00000010618	K70	0.79	3	289	1.03806
ENSCPOP00000009450	pep:novel scaffold:cavPor3:scaffold_16:15526444:15534756:-1 gene:ENSCPOG00000010523 transcript:ENSCPOT00000010618	K30	1	1	289	0.346021
ENSCPOP00000009450	pep:novel scaffold:cavPor3:scaffold_16:15526444:15534756:-1 gene:ENSCPOG00000010523 transcript:ENSCPOT00000010618	K60	0.99	1	289	0.346021
ENSCPOP00000009458	pep:novel scaffold:cavPor3:scaffold_4:44688181:44692956:1 gene:ENSCPOG00000010534 transcript:ENSCPOT00000010629	K256	1	38	39	97.4359	Yes
ENSCPOP00000009458	pep:novel scaffold:cavPor3:scaffold_4:44688181:44692956:1 gene:ENSCPOG00000010534 transcript:ENSCPOT00000010629	K342	1	1	39	2.5641
ENSCPOP00000009597	pep:novel scaffold:cavPor3:scaffold_321:211223:393569:-1 gene:ENSCPOG00000010695 transcript:ENSCPOT00000010792	K438	1	3	3	100	Yes
ENSCPOP00000009602	pep:novel scaffold:cavPor3:scaffold_23:16216334:16250910:-1 gene:ENSCPOG00000010700 transcript:ENSCPOT00000010797	K60	1	25	25	100	Yes
ENSCPOP00000009610	pep:novel scaffold:cavPor3:scaffold_26:21551142:21625367:1 gene:ENSCPOG00000010708 transcript:ENSCPOT00000010805	K268	1	11	12	91.6667	Yes
ENSCPOP00000009610	pep:novel scaffold:cavPor3:scaffold_26:21551142:21625367:1 gene:ENSCPOG00000010708 transcript:ENSCPOT00000010805	K134	1	1	12	8.33333
ENSCPOP00000009620	pep:novel scaffold:cavPor3:scaffold_115:2427099:2431032:-1 gene:ENSCPOG00000010717 transcript:ENSCPOT00000010815	K165	1	23	24	95.8333	Yes
ENSCPOP00000009620	pep:novel scaffold:cavPor3:scaffold_115:2427099:2431032:-1 gene:ENSCPOG00000010717 transcript:ENSCPOT00000010815	K46	1	1	24	4.16667
ENSCPOP00000009655	pep:novel scaffold:cavPor3:scaffold_48:1736056:1745695:-1 gene:ENSCPOG00000010755 transcript:ENSCPOT00000010853	K118	1	15	22	68.1818	Yes
ENSCPOP00000009655	pep:novel scaffold:cavPor3:scaffold_48:1736056:1745695:-1 gene:ENSCPOG00000010755 transcript:ENSCPOT00000010853	K73	1	6	22	27.2727
ENSCPOP00000009655	pep:novel scaffold:cavPor3:scaffold_48:1736056:1745695:-1 gene:ENSCPOG00000010755 transcript:ENSCPOT00000010853	K103	1	1	22	4.54545
ENSCPOP00000009761	pep:novel scaffold:cavPor3:scaffold_7:60678762:60735393:1 gene:ENSCPOG00000010866 transcript:ENSCPOT00000010966	K295	1	10	10	100	Yes
ENSCPOP00000009794	pep:novel scaffold:cavPor3:scaffold_98:1033898:1057934:1 gene:ENSCPOG00000010901 transcript:ENSCPOT00000011002	K118	1	40	91	43.956	Yes
ENSCPOP00000009794	pep:novel scaffold:cavPor3:scaffold_98:1033898:1057934:1 gene:ENSCPOG00000010901 transcript:ENSCPOT00000011002	K220	1	22	91	24.1758
ENSCPOP00000009794	pep:novel scaffold:cavPor3:scaffold_98:1033898:1057934:1 gene:ENSCPOG00000010901 transcript:ENSCPOT00000011002	K112	1	13	91	14.2857
ENSCPOP00000009794	pep:novel scaffold:cavPor3:scaffold_98:1033898:1057934:1 gene:ENSCPOG00000010901 transcript:ENSCPOT00000011002	K217	1	9	91	9.89011
ENSCPOP00000009794	pep:novel scaffold:cavPor3:scaffold_98:1033898:1057934:1 gene:ENSCPOG00000010901 transcript:ENSCPOT00000011002	K152	1	3	91	3.2967
ENSCPOP00000009794	pep:novel scaffold:cavPor3:scaffold_98:1033898:1057934:1 gene:ENSCPOG00000010901 transcript:ENSCPOT00000011002	K161	1	3	91	3.2967
ENSCPOP00000009794	pep:novel scaffold:cavPor3:scaffold_98:1033898:1057934:1 gene:ENSCPOG00000010901 transcript:ENSCPOT00000011002	K248	1	1	91	1.0989
ENSCPOP00000009821	pep:novel scaffold:cavPor3:scaffold_13:16632206:16634297:1 gene:ENSCPOG00000010930 transcript:ENSCPOT00000011031	K48	1	2	2	100	Yes
ENSCPOP00000009899	pep:novel scaffold:cavPor3:scaffold_4:18979981:19032554:-1 gene:ENSCPOG00000011013 transcript:ENSCPOT00000011114	K159	1	223	296	75.3378	Yes
ENSCPOP00000009899	pep:novel scaffold:cavPor3:scaffold_4:18979981:19032554:-1 gene:ENSCPOG00000011013 transcript:ENSCPOT00000011114	K154	1	71	296	23.9865
ENSCPOP00000009899	pep:novel scaffold:cavPor3:scaffold_4:18979981:19032554:-1 gene:ENSCPOG00000011013 transcript:ENSCPOT00000011114	K507	1	2	296	0.675676
ENSCPOP00000010012	pep:novel scaffold:cavPor3:scaffold_2:59559624:59581421:-1 gene:ENSCPOG00000011134 transcript:ENSCPOT00000011238	K252	1	9	17	52.9412	Yes
ENSCPOP00000010012	pep:novel scaffold:cavPor3:scaffold_2:59559624:59581421:-1 gene:ENSCPOG00000011134 transcript:ENSCPOT00000011238	K79	1	5	17	29.4118
ENSCPOP00000010012	pep:novel scaffold:cavPor3:scaffold_2:59559624:59581421:-1 gene:ENSCPOG00000011134 transcript:ENSCPOT00000011238	K297	1	2	17	11.7647
ENSCPOP00000010012	pep:novel scaffold:cavPor3:scaffold_2:59559624:59581421:-1 gene:ENSCPOG00000011134 transcript:ENSCPOT00000011238	K414	1	1	17	5.88235
ENSCPOP00000010077	pep:novel scaffold:cavPor3:scaffold_7:51643403:51650183:1 gene:ENSCPOG00000011207 transcript:ENSCPOT00000011313	K130	1	2	2	100	Yes
ENSCPOP00000010137	pep:novel scaffold:cavPor3:scaffold_5:23906759:24283840:-1 gene:ENSCPOG00000011274 transcript:ENSCPOT00000011380	K90	1	32	33	96.9697	Yes
ENSCPOP00000010137	pep:novel scaffold:cavPor3:scaffold_5:23906759:24283840:-1 gene:ENSCPOG00000011274 transcript:ENSCPOT00000011380	K495	1	1	33	3.0303
ENSCPOP00000010265	pep:novel scaffold:cavPor3:scaffold_90:789763:796018:1 gene:ENSCPOG00000011419 transcript:ENSCPOT00000011525	K156	1	175	281	62.2776	Yes
ENSCPOP00000010265	pep:novel scaffold:cavPor3:scaffold_90:789763:796018:1 gene:ENSCPOG00000011419 transcript:ENSCPOT00000011525	K105	1	38	281	13.5231
ENSCPOP00000010265	pep:novel scaffold:cavPor3:scaffold_90:789763:796018:1 gene:ENSCPOG00000011419 transcript:ENSCPOT00000011525	K169	1	32	281	11.3879
ENSCPOP00000010265	pep:novel scaffold:cavPor3:scaffold_90:789763:796018:1 gene:ENSCPOG00000011419 transcript:ENSCPOT00000011525	K208	1	24	281	8.54093
ENSCPOP00000010265	pep:novel scaffold:cavPor3:scaffold_90:789763:796018:1 gene:ENSCPOG00000011419 transcript:ENSCPOT00000011525	K146	1	5	281	1.77936
ENSCPOP00000010265	pep:novel scaffold:cavPor3:scaffold_90:789763:796018:1 gene:ENSCPOG00000011419 transcript:ENSCPOT00000011525	K238	1	4	281	1.42349
ENSCPOP00000010265	pep:novel scaffold:cavPor3:scaffold_90:789763:796018:1 gene:ENSCPOG00000011419 transcript:ENSCPOT00000011525	K121	1	2	281	0.711744
ENSCPOP00000010265	pep:novel scaffold:cavPor3:scaffold_90:789763:796018:1 gene:ENSCPOG00000011419 transcript:ENSCPOT00000011525	K176	0.03	1	281	0.355872
ENSCPOP00000010349	pep:novel scaffold:cavPor3:scaffold_321:65916:79243:-1 gene:ENSCPOG00000011506 transcript:ENSCPOT00000011614	K62	1	64	125	51.2	Yes
ENSCPOP00000010349	pep:novel scaffold:cavPor3:scaffold_321:65916:79243:-1 gene:ENSCPOG00000011506 transcript:ENSCPOT00000011614	K537	1	24	125	19.2
ENSCPOP00000010349	pep:novel scaffold:cavPor3:scaffold_321:65916:79243:-1 gene:ENSCPOG00000011506 transcript:ENSCPOT00000011614	K417	1	10	125	8
ENSCPOP00000010349	pep:novel scaffold:cavPor3:scaffold_321:65916:79243:-1 gene:ENSCPOG00000011506 transcript:ENSCPOT00000011614	K232	1	9	125	7.2
ENSCPOP00000010349	pep:novel scaffold:cavPor3:scaffold_321:65916:79243:-1 gene:ENSCPOG00000011506 transcript:ENSCPOT00000011614	K411	1	6	125	4.8
ENSCPOP00000010349	pep:novel scaffold:cavPor3:scaffold_321:65916:79243:-1 gene:ENSCPOG00000011506 transcript:ENSCPOT00000011614	K503	1	6	125	4.8
ENSCPOP00000010349	pep:novel scaffold:cavPor3:scaffold_321:65916:79243:-1 gene:ENSCPOG00000011506 transcript:ENSCPOT00000011614	K446	1	4	125	3.2
ENSCPOP00000010349	pep:novel scaffold:cavPor3:scaffold_321:65916:79243:-1 gene:ENSCPOG00000011506 transcript:ENSCPOT00000011614	K298	1	1	125	0.8
ENSCPOP00000010349	pep:novel scaffold:cavPor3:scaffold_321:65916:79243:-1 gene:ENSCPOG00000011506 transcript:ENSCPOT00000011614	K507	1	1	125	0.8
ENSCPOP00000010440	pep:novel scaffold:cavPor3:scaffold_9:3588155:3594238:-1 gene:ENSCPOG00000011606 transcript:ENSCPOT00000011718	K208	1	131	220	59.5455	Yes
ENSCPOP00000010440	pep:novel scaffold:cavPor3:scaffold_9:3588155:3594238:-1 gene:ENSCPOG00000011606 transcript:ENSCPOT00000011718	K233	1	64	220	29.0909
ENSCPOP00000010440	pep:novel scaffold:cavPor3:scaffold_9:3588155:3594238:-1 gene:ENSCPOG00000011606 transcript:ENSCPOT00000011718	K213	1	13	220	5.90909
ENSCPOP00000010440	pep:novel scaffold:cavPor3:scaffold_9:3588155:3594238:-1 gene:ENSCPOG00000011606 transcript:ENSCPOT00000011718	K308	1	6	220	2.72727
ENSCPOP00000010440	pep:novel scaffold:cavPor3:scaffold_9:3588155:3594238:-1 gene:ENSCPOG00000011606 transcript:ENSCPOT00000011718	K217	1	3	220	1.36364
ENSCPOP00000010440	pep:novel scaffold:cavPor3:scaffold_9:3588155:3594238:-1 gene:ENSCPOG00000011606 transcript:ENSCPOT00000011718	K98	1	3	220	1.36364
ENSCPOP00000010543	pep:novel scaffold:cavPor3:scaffold_19:35747084:35775346:-1 gene:ENSCPOG00000011723 transcript:ENSCPOT00000011837	K458	1	504	506	99.6047	Yes
ENSCPOP00000010543	pep:novel scaffold:cavPor3:scaffold_19:35747084:35775346:-1 gene:ENSCPOG00000011723 transcript:ENSCPOT00000011837	K454	0.05	1	506	0.197628
ENSCPOP00000010543	pep:novel scaffold:cavPor3:scaffold_19:35747084:35775346:-1 gene:ENSCPOG00000011723 transcript:ENSCPOT00000011837	K633	1	1	506	0.197628
ENSCPOP00000010693	pep:novel scaffold:cavPor3:scaffold_13:11543842:11552775:-1 gene:ENSCPOG00000011887 transcript:ENSCPOT00000012002	K330	1	30	40	75	Yes
ENSCPOP00000010693	pep:novel scaffold:cavPor3:scaffold_13:11543842:11552775:-1 gene:ENSCPOG00000011887 transcript:ENSCPOT00000012002	K792	1	10	40	25
ENSCPOP00000010702	pep:novel scaffold:cavPor3:scaffold_45:4541716:4573012:-1 gene:ENSCPOG00000011896 transcript:ENSCPOT00000012011	K205	1	19	19	100	Yes
ENSCPOP00000010729	pep:novel scaffold:cavPor3:scaffold_227:557790:566850:-1 gene:ENSCPOG00000011926 transcript:ENSCPOT00000012041	K87	1	11	13	84.6154	Yes
ENSCPOP00000010729	pep:novel scaffold:cavPor3:scaffold_227:557790:566850:-1 gene:ENSCPOG00000011926 transcript:ENSCPOT00000012041	K230	1	1	13	7.69231
ENSCPOP00000010729	pep:novel scaffold:cavPor3:scaffold_227:557790:566850:-1 gene:ENSCPOG00000011926 transcript:ENSCPOT00000012041	K132	1	1	13	7.69231
ENSCPOP00000010730	pep:novel scaffold:cavPor3:scaffold_21:15123631:15146990:1 gene:ENSCPOG00000011927 transcript:ENSCPOT00000012042	K166	1	37	94	39.3617	Yes
ENSCPOP00000010730	pep:novel scaffold:cavPor3:scaffold_21:15123631:15146990:1 gene:ENSCPOG00000011927 transcript:ENSCPOT00000012042	K35	1	34	94	36.1702
ENSCPOP00000010730	pep:novel scaffold:cavPor3:scaffold_21:15123631:15146990:1 gene:ENSCPOG00000011927 transcript:ENSCPOT00000012042	K81	1	12	94	12.766
ENSCPOP00000010730	pep:novel scaffold:cavPor3:scaffold_21:15123631:15146990:1 gene:ENSCPOG00000011927 transcript:ENSCPOT00000012042	K190	1	10	94	10.6383
ENSCPOP00000010730	pep:novel scaffold:cavPor3:scaffold_21:15123631:15146990:1 gene:ENSCPOG00000011927 transcript:ENSCPOT00000012042	K191	0.05	1	94	1.06383
ENSCPOP00000010829	pep:novel scaffold:cavPor3:scaffold_4:40014146:40023545:-1 gene:ENSCPOG00000012038 transcript:ENSCPOT00000012154	K97	1	20	22	90.9091	Yes
ENSCPOP00000010829	pep:novel scaffold:cavPor3:scaffold_4:40014146:40023545:-1 gene:ENSCPOG00000012038 transcript:ENSCPOT00000012154	K92	1	2	22	9.09091
ENSCPOP00000010906	pep:novel scaffold:cavPor3:scaffold_1:34736183:34743090:1 gene:ENSCPOG00000012129 transcript:ENSCPOT00000012245	K179	1	2	2	100	Yes
ENSCPOP00000010922	pep:novel scaffold:cavPor3:scaffold_0:19470918:19475074:1 gene:ENSCPOG00000012149 transcript:ENSCPOT00000012265	K96	1	34	83	40.9639	Yes
ENSCPOP00000010922	pep:novel scaffold:cavPor3:scaffold_0:19470918:19475074:1 gene:ENSCPOG00000012149 transcript:ENSCPOT00000012265	K88	1	27	83	32.5301
ENSCPOP00000010922	pep:novel scaffold:cavPor3:scaffold_0:19470918:19475074:1 gene:ENSCPOG00000012149 transcript:ENSCPOT00000012265	K78	1	18	83	21.6867
ENSCPOP00000010922	pep:novel scaffold:cavPor3:scaffold_0:19470918:19475074:1 gene:ENSCPOG00000012149 transcript:ENSCPOT00000012265	K45	1	3	83	3.61446
ENSCPOP00000010922	pep:novel scaffold:cavPor3:scaffold_0:19470918:19475074:1 gene:ENSCPOG00000012149 transcript:ENSCPOT00000012265	K83	0.97	1	83	1.20482
ENSCPOP00000011060	pep:novel scaffold:cavPor3:scaffold_25:5710930:5718340:1 gene:ENSCPOG00000012297 transcript:ENSCPOT00000012413	K38	1	8	11	72.7273	Yes
ENSCPOP00000011060	pep:novel scaffold:cavPor3:scaffold_25:5710930:5718340:1 gene:ENSCPOG00000012297 transcript:ENSCPOT00000012413	K53	1	3	11	27.2727
ENSCPOP00000011074	pep:novel scaffold:cavPor3:scaffold_107:589423:596421:1 gene:ENSCPOG00000012311 transcript:ENSCPOT00000012428	K127	1	30	93	32.2581	Yes
ENSCPOP00000011074	pep:novel scaffold:cavPor3:scaffold_107:589423:596421:1 gene:ENSCPOG00000012311 transcript:ENSCPOT00000012428	K129	1	25	93	26.8817
ENSCPOP00000011074	pep:novel scaffold:cavPor3:scaffold_107:589423:596421:1 gene:ENSCPOG00000012311 transcript:ENSCPOT00000012428	K148	1	14	93	15.0538
ENSCPOP00000011074	pep:novel scaffold:cavPor3:scaffold_107:589423:596421:1 gene:ENSCPOG00000012311 transcript:ENSCPOT00000012428	K146	1	14	93	15.0538
ENSCPOP00000011074	pep:novel scaffold:cavPor3:scaffold_107:589423:596421:1 gene:ENSCPOG00000012311 transcript:ENSCPOT00000012428	K130	0.02	5	93	5.37634
ENSCPOP00000011074	pep:novel scaffold:cavPor3:scaffold_107:589423:596421:1 gene:ENSCPOG00000012311 transcript:ENSCPOT00000012428	K161	0.33	3	93	3.22581
ENSCPOP00000011074	pep:novel scaffold:cavPor3:scaffold_107:589423:596421:1 gene:ENSCPOG00000012311 transcript:ENSCPOT00000012428	K156	1	2	93	2.15054
ENSCPOP00000011106	pep:novel scaffold:cavPor3:scaffold_107:398689:402677:-1 gene:ENSCPOG00000012344 transcript:ENSCPOT00000012461	K275	1	5	9	55.5556	Yes
ENSCPOP00000011106	pep:novel scaffold:cavPor3:scaffold_107:398689:402677:-1 gene:ENSCPOG00000012344 transcript:ENSCPOT00000012461	K193	1	4	9	44.4444
ENSCPOP00000011134	pep:novel scaffold:cavPor3:scaffold_1:44847412:44865680:-1 gene:ENSCPOG00000012372 transcript:ENSCPOT00000012490	K76	1	127	304	41.7763	Yes
ENSCPOP00000011134	pep:novel scaffold:cavPor3:scaffold_1:44847412:44865680:-1 gene:ENSCPOG00000012372 transcript:ENSCPOT00000012490	K272	1	86	304	28.2895
ENSCPOP00000011134	pep:novel scaffold:cavPor3:scaffold_1:44847412:44865680:-1 gene:ENSCPOG00000012372 transcript:ENSCPOT00000012490	K266	1	64	304	21.0526
ENSCPOP00000011134	pep:novel scaffold:cavPor3:scaffold_1:44847412:44865680:-1 gene:ENSCPOG00000012372 transcript:ENSCPOT00000012490	K147	1	17	304	5.59211
ENSCPOP00000011134	pep:novel scaffold:cavPor3:scaffold_1:44847412:44865680:-1 gene:ENSCPOG00000012372 transcript:ENSCPOT00000012490	K414	1	9	304	2.96053
ENSCPOP00000011134	pep:novel scaffold:cavPor3:scaffold_1:44847412:44865680:-1 gene:ENSCPOG00000012372 transcript:ENSCPOT00000012490	K257	1	1	304	0.328947
ENSCPOP00000011149	pep:novel scaffold:cavPor3:scaffold_156:1298272:1299767:-1 gene:ENSCPOG00000012392 transcript:ENSCPOT00000012510	K21	1	13	16	81.25	Yes
ENSCPOP00000011149	pep:novel scaffold:cavPor3:scaffold_156:1298272:1299767:-1 gene:ENSCPOG00000012392 transcript:ENSCPOT00000012510	K28	1	3	16	18.75
ENSCPOP00000011321	pep:novel scaffold:cavPor3:scaffold_14:14529901:14583848:-1 gene:ENSCPOG00000012583 transcript:ENSCPOT00000012704	K156	1	3	3	100	Yes
ENSCPOP00000011330	pep:novel scaffold:cavPor3:scaffold_100:3337618:3347154:-1 gene:ENSCPOG00000012594 transcript:ENSCPOT00000012715	K46	1	10	10	100	Yes
ENSCPOP00000011344	pep:novel scaffold:cavPor3:scaffold_7:47475927:47479038:-1 gene:ENSCPOG00000012609 transcript:ENSCPOT00000012730	K138	1	51	61	83.6066	Yes
ENSCPOP00000011344	pep:novel scaffold:cavPor3:scaffold_7:47475927:47479038:-1 gene:ENSCPOG00000012609 transcript:ENSCPOT00000012730	K167	1	10	61	16.3934
ENSCPOP00000011358	pep:novel scaffold:cavPor3:scaffold_73:2037894:2057895:1 gene:ENSCPOG00000012626 transcript:ENSCPOT00000012747	K221	1	9	9	100	Yes
ENSCPOP00000011373	pep:novel scaffold:cavPor3:scaffold_28:25045513:25081094:1 gene:ENSCPOG00000012642 transcript:ENSCPOT00000012763	K50	1	194	341	56.8915	Yes
ENSCPOP00000011373	pep:novel scaffold:cavPor3:scaffold_28:25045513:25081094:1 gene:ENSCPOG00000012642 transcript:ENSCPOT00000012763	K723	1	55	341	16.129
ENSCPOP00000011373	pep:novel scaffold:cavPor3:scaffold_28:25045513:25081094:1 gene:ENSCPOG00000012642 transcript:ENSCPOT00000012763	K228	1	24	341	7.03812
ENSCPOP00000011373	pep:novel scaffold:cavPor3:scaffold_28:25045513:25081094:1 gene:ENSCPOG00000012642 transcript:ENSCPOT00000012763	K517	1	21	341	6.15836
ENSCPOP00000011373	pep:novel scaffold:cavPor3:scaffold_28:25045513:25081094:1 gene:ENSCPOG00000012642 transcript:ENSCPOT00000012763	K523	1	20	341	5.8651
ENSCPOP00000011373	pep:novel scaffold:cavPor3:scaffold_28:25045513:25081094:1 gene:ENSCPOG00000012642 transcript:ENSCPOT00000012763	K309	1	10	341	2.93255
ENSCPOP00000011373	pep:novel scaffold:cavPor3:scaffold_28:25045513:25081094:1 gene:ENSCPOG00000012642 transcript:ENSCPOT00000012763	K305	1	6	341	1.75953
ENSCPOP00000011373	pep:novel scaffold:cavPor3:scaffold_28:25045513:25081094:1 gene:ENSCPOG00000012642 transcript:ENSCPOT00000012763	K304	1	6	341	1.75953
ENSCPOP00000011373	pep:novel scaffold:cavPor3:scaffold_28:25045513:25081094:1 gene:ENSCPOG00000012642 transcript:ENSCPOT00000012763	K605	1	3	341	0.879765
ENSCPOP00000011373	pep:novel scaffold:cavPor3:scaffold_28:25045513:25081094:1 gene:ENSCPOG00000012642 transcript:ENSCPOT00000012763	K138	1	1	341	0.293255
ENSCPOP00000011373	pep:novel scaffold:cavPor3:scaffold_28:25045513:25081094:1 gene:ENSCPOG00000012642 transcript:ENSCPOT00000012763	K57	0.63	1	341	0.293255
ENSCPOP00000011409	pep:novel scaffold:cavPor3:scaffold_43:5607266:5658730:-1 gene:ENSCPOG00000012683 transcript:ENSCPOT00000012804	K128	1	3	5	60	Yes
ENSCPOP00000011409	pep:novel scaffold:cavPor3:scaffold_43:5607266:5658730:-1 gene:ENSCPOG00000012683 transcript:ENSCPOT00000012804	K171	0.91	1	5	20
ENSCPOP00000011409	pep:novel scaffold:cavPor3:scaffold_43:5607266:5658730:-1 gene:ENSCPOG00000012683 transcript:ENSCPOT00000012804	K173	0.84	1	5	20
ENSCPOP00000011443	pep:novel scaffold:cavPor3:scaffold_14:19065414:19075174:1 gene:ENSCPOG00000012719 transcript:ENSCPOT00000012841	K536	1	373	743	50.2019	Yes
ENSCPOP00000011443	pep:novel scaffold:cavPor3:scaffold_14:19065414:19075174:1 gene:ENSCPOG00000012719 transcript:ENSCPOT00000012841	K528	1	120	743	16.1507
ENSCPOP00000011443	pep:novel scaffold:cavPor3:scaffold_14:19065414:19075174:1 gene:ENSCPOG00000012719 transcript:ENSCPOT00000012841	K236	1	78	743	10.498
ENSCPOP00000011443	pep:novel scaffold:cavPor3:scaffold_14:19065414:19075174:1 gene:ENSCPOG00000012719 transcript:ENSCPOT00000012841	K495	1	66	743	8.88291
ENSCPOP00000011443	pep:novel scaffold:cavPor3:scaffold_14:19065414:19075174:1 gene:ENSCPOG00000012719 transcript:ENSCPOT00000012841	K258	1	64	743	8.61373
ENSCPOP00000011443	pep:novel scaffold:cavPor3:scaffold_14:19065414:19075174:1 gene:ENSCPOG00000012719 transcript:ENSCPOT00000012841	K503	1	23	743	3.09556
ENSCPOP00000011443	pep:novel scaffold:cavPor3:scaffold_14:19065414:19075174:1 gene:ENSCPOG00000012719 transcript:ENSCPOT00000012841	K237	1	6	743	0.807537
ENSCPOP00000011443	pep:novel scaffold:cavPor3:scaffold_14:19065414:19075174:1 gene:ENSCPOG00000012719 transcript:ENSCPOT00000012841	K424	1	4	743	0.538358
ENSCPOP00000011443	pep:novel scaffold:cavPor3:scaffold_14:19065414:19075174:1 gene:ENSCPOG00000012719 transcript:ENSCPOT00000012841	K120	1	4	743	0.538358
ENSCPOP00000011443	pep:novel scaffold:cavPor3:scaffold_14:19065414:19075174:1 gene:ENSCPOG00000012719 transcript:ENSCPOT00000012841	K538	0	3	743	0.403769
ENSCPOP00000011443	pep:novel scaffold:cavPor3:scaffold_14:19065414:19075174:1 gene:ENSCPOG00000012719 transcript:ENSCPOT00000012841	K158	1	1	743	0.13459
ENSCPOP00000011443	pep:novel scaffold:cavPor3:scaffold_14:19065414:19075174:1 gene:ENSCPOG00000012719 transcript:ENSCPOT00000012841	K238	0.09	1	743	0.13459
ENSCPOP00000011563	pep:novel scaffold:cavPor3:scaffold_14:32249592:32254930:-1 gene:ENSCPOG00000012845 transcript:ENSCPOT00000012970	K14	1	2	2	100	Yes
ENSCPOP00000011583	pep:novel scaffold:cavPor3:scaffold_0:28786102:28794798:1 gene:ENSCPOG00000012870 transcript:ENSCPOT00000012995	K155	1	1	1	100	Yes
ENSCPOP00000011640	pep:known scaffold:cavPor3:scaffold_19:35866009:35869151:1 gene:ENSCPOG00000012928 transcript:ENSCPOT00000013053	K174	1	3	6	50	Yes (Tie)
ENSCPOP00000011640	pep:known scaffold:cavPor3:scaffold_19:35866009:35869151:1 gene:ENSCPOG00000012928 transcript:ENSCPOT00000013053	K175	1	3	6	50	Yes (Tie)
ENSCPOP00000011651	pep:novel scaffold:cavPor3:scaffold_13:2504462:2538385:-1 gene:ENSCPOG00000012942 transcript:ENSCPOT00000013067	K983	1	199	318	62.5786	Yes
ENSCPOP00000011651	pep:novel scaffold:cavPor3:scaffold_13:2504462:2538385:-1 gene:ENSCPOG00000012942 transcript:ENSCPOT00000013067	K241	1	100	318	31.4465
ENSCPOP00000011651	pep:novel scaffold:cavPor3:scaffold_13:2504462:2538385:-1 gene:ENSCPOG00000012942 transcript:ENSCPOT00000013067	K233	1	10	318	3.14465
ENSCPOP00000011651	pep:novel scaffold:cavPor3:scaffold_13:2504462:2538385:-1 gene:ENSCPOG00000012942 transcript:ENSCPOT00000013067	K479	1	6	318	1.88679
ENSCPOP00000011651	pep:novel scaffold:cavPor3:scaffold_13:2504462:2538385:-1 gene:ENSCPOG00000012942 transcript:ENSCPOT00000013067	K189	1	3	318	0.943396
ENSCPOP00000011654	pep:novel scaffold:cavPor3:scaffold_232:23528:45611:1 gene:ENSCPOG00000012945 transcript:ENSCPOT00000013070	K384	1	63	85	74.1176	Yes
ENSCPOP00000011654	pep:novel scaffold:cavPor3:scaffold_232:23528:45611:1 gene:ENSCPOG00000012945 transcript:ENSCPOT00000013070	K325	1	22	85	25.8824
ENSCPOP00000011673	pep:novel scaffold:cavPor3:scaffold_29:14939013:15052270:1 gene:ENSCPOG00000012966 transcript:ENSCPOT00000013091	K421	1	247	417	59.2326	Yes
ENSCPOP00000011673	pep:novel scaffold:cavPor3:scaffold_29:14939013:15052270:1 gene:ENSCPOG00000012966 transcript:ENSCPOT00000013091	K296	1	96	417	23.0216
ENSCPOP00000011673	pep:novel scaffold:cavPor3:scaffold_29:14939013:15052270:1 gene:ENSCPOG00000012966 transcript:ENSCPOT00000013091	K455	1	38	417	9.11271
ENSCPOP00000011673	pep:novel scaffold:cavPor3:scaffold_29:14939013:15052270:1 gene:ENSCPOG00000012966 transcript:ENSCPOT00000013091	K473	1	35	417	8.39329
ENSCPOP00000011673	pep:novel scaffold:cavPor3:scaffold_29:14939013:15052270:1 gene:ENSCPOG00000012966 transcript:ENSCPOT00000013091	K480	1	1	417	0.239808
ENSCPOP00000011674	pep:novel scaffold:cavPor3:scaffold_80:3647536:3647862:-1 gene:ENSCPOG00000012967 transcript:ENSCPOT00000013092	K104	1	26	39	66.6667	Yes
ENSCPOP00000011674	pep:novel scaffold:cavPor3:scaffold_80:3647536:3647862:-1 gene:ENSCPOG00000012967 transcript:ENSCPOT00000013092	K68	1	6	39	15.3846
ENSCPOP00000011674	pep:novel scaffold:cavPor3:scaffold_80:3647536:3647862:-1 gene:ENSCPOG00000012967 transcript:ENSCPOT00000013092	K55	1	5	39	12.8205
ENSCPOP00000011674	pep:novel scaffold:cavPor3:scaffold_80:3647536:3647862:-1 gene:ENSCPOG00000012967 transcript:ENSCPOT00000013092	K106	0.33	2	39	5.12821
ENSCPOP00000011748	pep:known scaffold:cavPor3:scaffold_9:5779044:5807660:1 gene:ENSCPOG00000013048 transcript:ENSCPOT00000013175	K73	1	13	13	100	Yes
ENSCPOP00000011810	pep:novel scaffold:cavPor3:scaffold_6:17231705:17263534:1 gene:ENSCPOG00000013120 transcript:ENSCPOT00000013247	K65	1	98	174	56.3218	Yes
ENSCPOP00000011810	pep:novel scaffold:cavPor3:scaffold_6:17231705:17263534:1 gene:ENSCPOG00000013120 transcript:ENSCPOT00000013247	K352	1	53	174	30.4598
ENSCPOP00000011810	pep:novel scaffold:cavPor3:scaffold_6:17231705:17263534:1 gene:ENSCPOG00000013120 transcript:ENSCPOT00000013247	K434	1	11	174	6.32184
ENSCPOP00000011810	pep:novel scaffold:cavPor3:scaffold_6:17231705:17263534:1 gene:ENSCPOG00000013120 transcript:ENSCPOT00000013247	K411	1	6	174	3.44828
ENSCPOP00000011810	pep:novel scaffold:cavPor3:scaffold_6:17231705:17263534:1 gene:ENSCPOG00000013120 transcript:ENSCPOT00000013247	K66	0	3	174	1.72414
ENSCPOP00000011810	pep:novel scaffold:cavPor3:scaffold_6:17231705:17263534:1 gene:ENSCPOG00000013120 transcript:ENSCPOT00000013247	K361	1	3	174	1.72414
ENSCPOP00000011828	pep:novel scaffold:cavPor3:scaffold_61:10028635:10033077:1 gene:ENSCPOG00000013139 transcript:ENSCPOT00000013266	K275	1	3	9	33.3333	Yes
ENSCPOP00000011828	pep:novel scaffold:cavPor3:scaffold_61:10028635:10033077:1 gene:ENSCPOG00000013139 transcript:ENSCPOT00000013266	K193	1	2	9	22.2222
ENSCPOP00000011828	pep:novel scaffold:cavPor3:scaffold_61:10028635:10033077:1 gene:ENSCPOG00000013139 transcript:ENSCPOT00000013266	K80	1	2	9	22.2222
ENSCPOP00000011828	pep:novel scaffold:cavPor3:scaffold_61:10028635:10033077:1 gene:ENSCPOG00000013139 transcript:ENSCPOT00000013266	K197	0.06	1	9	11.1111
ENSCPOP00000011828	pep:novel scaffold:cavPor3:scaffold_61:10028635:10033077:1 gene:ENSCPOG00000013139 transcript:ENSCPOT00000013266	K89	1	1	9	11.1111
ENSCPOP00000011862	pep:novel scaffold:cavPor3:scaffold_101:566385:595998:1 gene:ENSCPOG00000013176 transcript:ENSCPOT00000013303	K258	1	1	1	100	Yes
ENSCPOP00000011904	pep:novel scaffold:cavPor3:scaffold_14:7948343:7978673:1 gene:ENSCPOG00000013224 transcript:ENSCPOT00000013351	K291	1	5	5	100	Yes
ENSCPOP00000011918	pep:novel scaffold:cavPor3:scaffold_95:3236041:3237466:1 gene:ENSCPOG00000013237 transcript:ENSCPOT00000013365	K283	1	4	4	100	Yes
ENSCPOP00000011954	pep:novel scaffold:cavPor3:scaffold_53:7298438:7312532:-1 gene:ENSCPOG00000013278 transcript:ENSCPOT00000013407	K459	1	83	261	31.8008	Yes
ENSCPOP00000011954	pep:novel scaffold:cavPor3:scaffold_53:7298438:7312532:-1 gene:ENSCPOG00000013278 transcript:ENSCPOT00000013407	K139	1	68	261	26.0536
ENSCPOP00000011954	pep:novel scaffold:cavPor3:scaffold_53:7298438:7312532:-1 gene:ENSCPOG00000013278 transcript:ENSCPOT00000013407	K142	1	57	261	21.8391
ENSCPOP00000011954	pep:novel scaffold:cavPor3:scaffold_53:7298438:7312532:-1 gene:ENSCPOG00000013278 transcript:ENSCPOT00000013407	K128	1	36	261	13.7931
ENSCPOP00000011954	pep:novel scaffold:cavPor3:scaffold_53:7298438:7312532:-1 gene:ENSCPOG00000013278 transcript:ENSCPOT00000013407	K129	0.41	14	261	5.36398
ENSCPOP00000011954	pep:novel scaffold:cavPor3:scaffold_53:7298438:7312532:-1 gene:ENSCPOG00000013278 transcript:ENSCPOT00000013407	K151	1	2	261	0.766284
ENSCPOP00000011954	pep:novel scaffold:cavPor3:scaffold_53:7298438:7312532:-1 gene:ENSCPOG00000013278 transcript:ENSCPOT00000013407	K32	1	1	261	0.383142
ENSCPOP00000012030	pep:novel scaffold:cavPor3:scaffold_115:3032722:3062306:1 gene:ENSCPOG00000013363 transcript:ENSCPOT00000013494	K77	0.43	6	12	50	Yes
ENSCPOP00000012030	pep:novel scaffold:cavPor3:scaffold_115:3032722:3062306:1 gene:ENSCPOG00000013363 transcript:ENSCPOT00000013494	K85	0.14	3	12	25
ENSCPOP00000012030	pep:novel scaffold:cavPor3:scaffold_115:3032722:3062306:1 gene:ENSCPOG00000013363 transcript:ENSCPOT00000013494	K372	0.99	2	12	16.6667
ENSCPOP00000012030	pep:novel scaffold:cavPor3:scaffold_115:3032722:3062306:1 gene:ENSCPOG00000013363 transcript:ENSCPOT00000013494	K82	0.89	1	12	8.33333
ENSCPOP00000012084	pep:novel scaffold:cavPor3:scaffold_16:19620624:19831690:-1 gene:ENSCPOG00000013421 transcript:ENSCPOT00000013553	K243	1	163	190	85.7895	Yes
ENSCPOP00000012084	pep:novel scaffold:cavPor3:scaffold_16:19620624:19831690:-1 gene:ENSCPOG00000013421 transcript:ENSCPOT00000013553	K319	1	14	190	7.36842
ENSCPOP00000012084	pep:novel scaffold:cavPor3:scaffold_16:19620624:19831690:-1 gene:ENSCPOG00000013421 transcript:ENSCPOT00000013553	K198	1	12	190	6.31579
ENSCPOP00000012084	pep:novel scaffold:cavPor3:scaffold_16:19620624:19831690:-1 gene:ENSCPOG00000013421 transcript:ENSCPOT00000013553	K251	0.98	1	190	0.526316
ENSCPOP00000012216	pep:novel scaffold:cavPor3:scaffold_145:455930:492653:1 gene:ENSCPOG00000013569 transcript:ENSCPOT00000013704	K245	1	2	2	100	Yes
ENSCPOP00000012232	pep:known scaffold:cavPor3:scaffold_13:41687356:41701856:-1 gene:ENSCPOG00000013587 transcript:ENSCPOT00000013722	K81	1	14	15	93.3333	Yes
ENSCPOP00000012232	pep:known scaffold:cavPor3:scaffold_13:41687356:41701856:-1 gene:ENSCPOG00000013587 transcript:ENSCPOT00000013722	K58	1	1	15	6.66667
ENSCPOP00000012305	pep:novel scaffold:cavPor3:scaffold_15:27333037:27338216:1 gene:ENSCPOG00000013666 transcript:ENSCPOT00000013804	K179	1	2	2	100	Yes
ENSCPOP00000012344	pep:novel scaffold:cavPor3:scaffold_27:13320622:13333685:-1 gene:ENSCPOG00000013707 transcript:ENSCPOT00000013846	K9	1	1	1	100	Yes
ENSCPOP00000012587	pep:novel scaffold:cavPor3:scaffold_16:5484889:5557403:1 gene:ENSCPOG00000013969 transcript:ENSCPOT00000014110	K96	1	1	2	50	Yes (Tie)
ENSCPOP00000012587	pep:novel scaffold:cavPor3:scaffold_16:5484889:5557403:1 gene:ENSCPOG00000013969 transcript:ENSCPOT00000014110	K584	1	1	2	50	Yes (Tie)
ENSCPOP00000012673	pep:novel scaffold:cavPor3:scaffold_2:35863251:35875058:1 gene:ENSCPOG00000014070 transcript:ENSCPOT00000014212	K154	1	167	512	32.6172	Yes
ENSCPOP00000012673	pep:novel scaffold:cavPor3:scaffold_2:35863251:35875058:1 gene:ENSCPOG00000014070 transcript:ENSCPOT00000014212	K233	1	161	512	31.4453
ENSCPOP00000012673	pep:novel scaffold:cavPor3:scaffold_2:35863251:35875058:1 gene:ENSCPOG00000014070 transcript:ENSCPOT00000014212	K162	1	112	512	21.875
ENSCPOP00000012673	pep:novel scaffold:cavPor3:scaffold_2:35863251:35875058:1 gene:ENSCPOG00000014070 transcript:ENSCPOT00000014212	K244	1	49	512	9.57031
ENSCPOP00000012673	pep:novel scaffold:cavPor3:scaffold_2:35863251:35875058:1 gene:ENSCPOG00000014070 transcript:ENSCPOT00000014212	K191	1	11	512	2.14844
ENSCPOP00000012673	pep:novel scaffold:cavPor3:scaffold_2:35863251:35875058:1 gene:ENSCPOG00000014070 transcript:ENSCPOT00000014212	K221	1	5	512	0.976562
ENSCPOP00000012673	pep:novel scaffold:cavPor3:scaffold_2:35863251:35875058:1 gene:ENSCPOG00000014070 transcript:ENSCPOT00000014212	K144	1	4	512	0.78125
ENSCPOP00000012673	pep:novel scaffold:cavPor3:scaffold_2:35863251:35875058:1 gene:ENSCPOG00000014070 transcript:ENSCPOT00000014212	K238	1	3	512	0.585938
ENSCPOP00000012765	pep:novel scaffold:cavPor3:scaffold_35:15209255:15212535:-1 gene:ENSCPOG00000014169 transcript:ENSCPOT00000014311	K34	1	24	45	53.3333	Yes
ENSCPOP00000012765	pep:novel scaffold:cavPor3:scaffold_35:15209255:15212535:-1 gene:ENSCPOG00000014169 transcript:ENSCPOT00000014311	K37	1	18	45	40
ENSCPOP00000012765	pep:novel scaffold:cavPor3:scaffold_35:15209255:15212535:-1 gene:ENSCPOG00000014169 transcript:ENSCPOT00000014311	K47	0.33	3	45	6.66667
ENSCPOP00000012797	pep:novel scaffold:cavPor3:scaffold_2:33881865:33886629:1 gene:ENSCPOG00000014205 transcript:ENSCPOT00000014347	K94	1	3	3	100	Yes
ENSCPOP00000012815	pep:known scaffold:cavPor3:scaffold_52:1829283:1835223:-1 gene:ENSCPOG00000014223 transcript:ENSCPOT00000014365	K132	1	20	20	100	Yes
ENSCPOP00000013152	pep:novel scaffold:cavPor3:scaffold_21:24549965:24560266:1 gene:ENSCPOG00000014597 transcript:ENSCPOT00000014742	K312	1	46	47	97.8723	Yes
ENSCPOP00000013152	pep:novel scaffold:cavPor3:scaffold_21:24549965:24560266:1 gene:ENSCPOG00000014597 transcript:ENSCPOT00000014742	K97	0.82	1	47	2.12766
ENSCPOP00000013208	pep:novel scaffold:cavPor3:scaffold_25:8153707:8155747:-1 gene:ENSCPOG00000014658 transcript:ENSCPOT00000014803	K83	0.97	2	2	100	Yes
ENSCPOP00000013280	pep:novel scaffold:cavPor3:scaffold_45:1187560:1200928:-1 gene:ENSCPOG00000014740 transcript:ENSCPOT00000014885	K166	0.88	3	5	60	Yes
ENSCPOP00000013280	pep:novel scaffold:cavPor3:scaffold_45:1187560:1200928:-1 gene:ENSCPOG00000014740 transcript:ENSCPOT00000014885	K43	0.99	1	5	20
ENSCPOP00000013280	pep:novel scaffold:cavPor3:scaffold_45:1187560:1200928:-1 gene:ENSCPOG00000014740 transcript:ENSCPOT00000014885	K170	0.89	1	5	20
ENSCPOP00000013353	pep:novel scaffold:cavPor3:scaffold_3:17880593:17968263:1 gene:ENSCPOG00000014818 transcript:ENSCPOT00000014963	K575	1	4	4	100	Yes
ENSCPOP00000013435	pep:known scaffold:cavPor3:scaffold_9:41905023:41916201:1 gene:ENSCPOG00000014910 transcript:ENSCPOT00000015055	K327	1	302	627	48.1659	Yes
ENSCPOP00000013435	pep:known scaffold:cavPor3:scaffold_9:41905023:41916201:1 gene:ENSCPOG00000014910 transcript:ENSCPOT00000015055	K321	1	252	627	40.1914
ENSCPOP00000013435	pep:known scaffold:cavPor3:scaffold_9:41905023:41916201:1 gene:ENSCPOG00000014910 transcript:ENSCPOT00000015055	K103	1	59	627	9.40989
ENSCPOP00000013435	pep:known scaffold:cavPor3:scaffold_9:41905023:41916201:1 gene:ENSCPOG00000014910 transcript:ENSCPOT00000015055	K375	1	12	627	1.91388
ENSCPOP00000013435	pep:known scaffold:cavPor3:scaffold_9:41905023:41916201:1 gene:ENSCPOG00000014910 transcript:ENSCPOT00000015055	K382	1	2	627	0.318979
ENSCPOP00000013476	pep:novel scaffold:cavPor3:scaffold_18:26769680:26778031:-1 gene:ENSCPOG00000014953 transcript:ENSCPOT00000015099	K69	1	13	18	72.2222	Yes
ENSCPOP00000013476	pep:novel scaffold:cavPor3:scaffold_18:26769680:26778031:-1 gene:ENSCPOG00000014953 transcript:ENSCPOT00000015099	K65	1	3	18	16.6667
ENSCPOP00000013476	pep:novel scaffold:cavPor3:scaffold_18:26769680:26778031:-1 gene:ENSCPOG00000014953 transcript:ENSCPOT00000015099	K27	1	1	18	5.55556
ENSCPOP00000013476	pep:novel scaffold:cavPor3:scaffold_18:26769680:26778031:-1 gene:ENSCPOG00000014953 transcript:ENSCPOT00000015099	K51	1	1	18	5.55556
ENSCPOP00000013483	pep:novel scaffold:cavPor3:scaffold_6:57908024:57954535:-1 gene:ENSCPOG00000014961 transcript:ENSCPOT00000015107	K408	1	204	218	93.578	Yes
ENSCPOP00000013483	pep:novel scaffold:cavPor3:scaffold_6:57908024:57954535:-1 gene:ENSCPOG00000014961 transcript:ENSCPOT00000015107	K58	1	12	218	5.50459
ENSCPOP00000013483	pep:novel scaffold:cavPor3:scaffold_6:57908024:57954535:-1 gene:ENSCPOG00000014961 transcript:ENSCPOT00000015107	K338	1	2	218	0.917431
ENSCPOP00000013564	pep:novel scaffold:cavPor3:scaffold_136:798095:818006:1 gene:ENSCPOG00000015048 transcript:ENSCPOT00000015195	K174	1	35	99	35.3535	Yes
ENSCPOP00000013564	pep:novel scaffold:cavPor3:scaffold_136:798095:818006:1 gene:ENSCPOG00000015048 transcript:ENSCPOT00000015195	K190	1	25	99	25.2525
ENSCPOP00000013564	pep:novel scaffold:cavPor3:scaffold_136:798095:818006:1 gene:ENSCPOG00000015048 transcript:ENSCPOT00000015195	K251	1	19	99	19.1919
ENSCPOP00000013564	pep:novel scaffold:cavPor3:scaffold_136:798095:818006:1 gene:ENSCPOG00000015048 transcript:ENSCPOT00000015195	K202	1	12	99	12.1212
ENSCPOP00000013564	pep:novel scaffold:cavPor3:scaffold_136:798095:818006:1 gene:ENSCPOG00000015048 transcript:ENSCPOT00000015195	K307	1	3	99	3.0303
ENSCPOP00000013564	pep:novel scaffold:cavPor3:scaffold_136:798095:818006:1 gene:ENSCPOG00000015048 transcript:ENSCPOT00000015195	K83	1	2	99	2.0202
ENSCPOP00000013564	pep:novel scaffold:cavPor3:scaffold_136:798095:818006:1 gene:ENSCPOG00000015048 transcript:ENSCPOT00000015195	K263	1	1	99	1.0101
ENSCPOP00000013564	pep:novel scaffold:cavPor3:scaffold_136:798095:818006:1 gene:ENSCPOG00000015048 transcript:ENSCPOT00000015195	K257	1	1	99	1.0101
ENSCPOP00000013564	pep:novel scaffold:cavPor3:scaffold_136:798095:818006:1 gene:ENSCPOG00000015048 transcript:ENSCPOT00000015195	K87	0.11	1	99	1.0101
ENSCPOP00000013805	pep:novel scaffold:cavPor3:scaffold_8:21940631:21944769:1 gene:ENSCPOG00000015319 transcript:ENSCPOT00000015468	K87	1	7	8	87.5	Yes
ENSCPOP00000013805	pep:novel scaffold:cavPor3:scaffold_8:21940631:21944769:1 gene:ENSCPOG00000015319 transcript:ENSCPOT00000015468	K126	1	1	8	12.5
ENSCPOP00000013810	pep:known scaffold:cavPor3:scaffold_12:21062483:21074010:1 gene:ENSCPOG00000015324 transcript:ENSCPOT00000015473	K70	1	13	13	100	Yes
ENSCPOP00000013842	pep:known scaffold:cavPor3:scaffold_114:766370:770831:1 gene:ENSCPOG00000015357 transcript:ENSCPOT00000015506	K290	1	21	51	41.1765	Yes
ENSCPOP00000013842	pep:known scaffold:cavPor3:scaffold_114:766370:770831:1 gene:ENSCPOG00000015357 transcript:ENSCPOT00000015506	K171	1	16	51	31.3725
ENSCPOP00000013842	pep:known scaffold:cavPor3:scaffold_114:766370:770831:1 gene:ENSCPOG00000015357 transcript:ENSCPOT00000015506	K179	1	14	51	27.451
ENSCPOP00000013843	pep:known scaffold:cavPor3:scaffold_114:814331:819125:1 gene:ENSCPOG00000015330 transcript:ENSCPOT00000015507	K164	1	12	30	40	Yes
ENSCPOP00000013843	pep:known scaffold:cavPor3:scaffold_114:814331:819125:1 gene:ENSCPOG00000015330 transcript:ENSCPOT00000015507	K283	1	10	30	33.3333
ENSCPOP00000013843	pep:known scaffold:cavPor3:scaffold_114:814331:819125:1 gene:ENSCPOG00000015330 transcript:ENSCPOT00000015507	K172	1	8	30	26.6667
ENSCPOP00000013906	pep:novel scaffold:cavPor3:scaffold_4:5796066:5808668:1 gene:ENSCPOG00000015423 transcript:ENSCPOT00000015574	K308	1	33	37	89.1892	Yes
ENSCPOP00000013906	pep:novel scaffold:cavPor3:scaffold_4:5796066:5808668:1 gene:ENSCPOG00000015423 transcript:ENSCPOT00000015574	K264	1	2	37	5.40541
ENSCPOP00000013906	pep:novel scaffold:cavPor3:scaffold_4:5796066:5808668:1 gene:ENSCPOG00000015423 transcript:ENSCPOT00000015574	K139	0	1	37	2.7027
ENSCPOP00000013906	pep:novel scaffold:cavPor3:scaffold_4:5796066:5808668:1 gene:ENSCPOG00000015423 transcript:ENSCPOT00000015574	K53	1	1	37	2.7027
ENSCPOP00000013961	pep:novel scaffold:cavPor3:scaffold_25:16197281:16256636:1 gene:ENSCPOG00000015480 transcript:ENSCPOT00000015632	K413	1	3	4	75	Yes
ENSCPOP00000013961	pep:novel scaffold:cavPor3:scaffold_25:16197281:16256636:1 gene:ENSCPOG00000015480 transcript:ENSCPOT00000015632	K419	1	1	4	25
ENSCPOP00000014052	pep:novel scaffold:cavPor3:scaffold_7:53120083:53508839:1 gene:ENSCPOG00000015584 transcript:ENSCPOT00000015736	K163	1	2	2	100	Yes
ENSCPOP00000014155	pep:novel scaffold:cavPor3:scaffold_304:242571:247378:1 gene:ENSCPOG00000015697 transcript:ENSCPOT00000015852	K271	1	1	1	100	Yes
ENSCPOP00000014295	pep:novel scaffold:cavPor3:scaffold_104:3176646:3177823:-1 gene:ENSCPOG00000027474 transcript:ENSCPOT00000025701	K99	1	8	14	57.1429	Yes
ENSCPOP00000014295	pep:novel scaffold:cavPor3:scaffold_104:3176646:3177823:-1 gene:ENSCPOG00000027474 transcript:ENSCPOT00000025701	K86	1	5	14	35.7143
ENSCPOP00000014295	pep:novel scaffold:cavPor3:scaffold_104:3176646:3177823:-1 gene:ENSCPOG00000027474 transcript:ENSCPOT00000025701	K70	1	1	14	7.14286
ENSCPOP00000014325	pep:novel scaffold:cavPor3:scaffold_18:38445082:38452255:-1 gene:ENSCPOG00000022241 transcript:ENSCPOT00000024440	K222	1	2	2	100	Yes
ENSCPOP00000014751	pep:novel scaffold:cavPor3:scaffold_3:11929130:11992796:1 gene:ENSCPOG00000003907 transcript:ENSCPOT00000022569	K14736	1	10	18	55.5556	Yes
ENSCPOP00000014751	pep:novel scaffold:cavPor3:scaffold_3:11929130:11992796:1 gene:ENSCPOG00000003907 transcript:ENSCPOT00000022569	K4532	1	3	18	16.6667
ENSCPOP00000014751	pep:novel scaffold:cavPor3:scaffold_3:11929130:11992796:1 gene:ENSCPOG00000003907 transcript:ENSCPOT00000022569	K13934	0.96	1	18	5.55556
ENSCPOP00000014751	pep:novel scaffold:cavPor3:scaffold_3:11929130:11992796:1 gene:ENSCPOG00000003907 transcript:ENSCPOT00000022569	K5326	1	1	18	5.55556
ENSCPOP00000014751	pep:novel scaffold:cavPor3:scaffold_3:11929130:11992796:1 gene:ENSCPOG00000003907 transcript:ENSCPOT00000022569	K14744	0.01	1	18	5.55556
ENSCPOP00000014751	pep:novel scaffold:cavPor3:scaffold_3:11929130:11992796:1 gene:ENSCPOG00000003907 transcript:ENSCPOT00000022569	K2720	1	1	18	5.55556
ENSCPOP00000014751	pep:novel scaffold:cavPor3:scaffold_3:11929130:11992796:1 gene:ENSCPOG00000003907 transcript:ENSCPOT00000022569	K4983	1	1	18	5.55556
ENSCPOP00000014862	pep:novel scaffold:cavPor3:scaffold_61:9395190:9400078:-1 gene:ENSCPOG00000020114 transcript:ENSCPOT00000020475	K120	1	314	716	43.8547	Yes
ENSCPOP00000014862	pep:novel scaffold:cavPor3:scaffold_61:9395190:9400078:-1 gene:ENSCPOG00000020114 transcript:ENSCPOT00000020475	K238	1	260	716	36.3128
ENSCPOP00000014862	pep:novel scaffold:cavPor3:scaffold_61:9395190:9400078:-1 gene:ENSCPOG00000020114 transcript:ENSCPOT00000020475	K638	1	77	716	10.7542
ENSCPOP00000014862	pep:novel scaffold:cavPor3:scaffold_61:9395190:9400078:-1 gene:ENSCPOG00000020114 transcript:ENSCPOT00000020475	K275	1	30	716	4.18994
ENSCPOP00000014862	pep:novel scaffold:cavPor3:scaffold_61:9395190:9400078:-1 gene:ENSCPOG00000020114 transcript:ENSCPOT00000020475	K277	1	28	716	3.91061
ENSCPOP00000014862	pep:novel scaffold:cavPor3:scaffold_61:9395190:9400078:-1 gene:ENSCPOG00000020114 transcript:ENSCPOT00000020475	K297	1	5	716	0.698324
ENSCPOP00000014862	pep:novel scaffold:cavPor3:scaffold_61:9395190:9400078:-1 gene:ENSCPOG00000020114 transcript:ENSCPOT00000020475	K634	1	1	716	0.139665
ENSCPOP00000014862	pep:novel scaffold:cavPor3:scaffold_61:9395190:9400078:-1 gene:ENSCPOG00000020114 transcript:ENSCPOT00000020475	K298	0.88	1	716	0.139665
ENSCPOP00000015130	pep:novel scaffold:cavPor3:scaffold_108:1665430:1665810:1 gene:ENSCPOG00000022212 transcript:ENSCPOT00000022288	K17	1	453	1874	24.1729	Yes
ENSCPOP00000015130	pep:novel scaffold:cavPor3:scaffold_108:1665430:1665810:1 gene:ENSCPOG00000022212 transcript:ENSCPOT00000022288	K16	1	444	1874	23.6926
ENSCPOP00000015130	pep:novel scaffold:cavPor3:scaffold_108:1665430:1665810:1 gene:ENSCPOG00000022212 transcript:ENSCPOT00000022288	K13	1	404	1874	21.5582
ENSCPOP00000015130	pep:novel scaffold:cavPor3:scaffold_108:1665430:1665810:1 gene:ENSCPOG00000022212 transcript:ENSCPOT00000022288	K21	1	317	1874	16.9157
ENSCPOP00000015130	pep:novel scaffold:cavPor3:scaffold_108:1665430:1665810:1 gene:ENSCPOG00000022212 transcript:ENSCPOT00000022288	K12	1	148	1874	7.89755
ENSCPOP00000015130	pep:novel scaffold:cavPor3:scaffold_108:1665430:1665810:1 gene:ENSCPOG00000022212 transcript:ENSCPOT00000022288	K24	1	48	1874	2.56137
ENSCPOP00000015130	pep:novel scaffold:cavPor3:scaffold_108:1665430:1665810:1 gene:ENSCPOG00000022212 transcript:ENSCPOT00000022288	K6	1	48	1874	2.56137
ENSCPOP00000015130	pep:novel scaffold:cavPor3:scaffold_108:1665430:1665810:1 gene:ENSCPOG00000022212 transcript:ENSCPOT00000022288	K109	1	10	1874	0.533618
ENSCPOP00000015130	pep:novel scaffold:cavPor3:scaffold_108:1665430:1665810:1 gene:ENSCPOG00000022212 transcript:ENSCPOT00000022288	K121	1	1	1874	0.0533618
ENSCPOP00000015130	pep:novel scaffold:cavPor3:scaffold_108:1665430:1665810:1 gene:ENSCPOG00000022212 transcript:ENSCPOT00000022288	K117	1	1	1874	0.0533618
ENSCPOP00000015632	pep:novel scaffold:cavPor3:scaffold_2:10925027:10925335:1 gene:ENSCPOG00000023951 transcript:ENSCPOT00000024265	K13	1	1424	4392	32.4226	Yes
ENSCPOP00000015632	pep:novel scaffold:cavPor3:scaffold_2:10925027:10925335:1 gene:ENSCPOG00000023951 transcript:ENSCPOT00000024265	K9	1	1160	4392	26.4117
ENSCPOP00000015632	pep:novel scaffold:cavPor3:scaffold_2:10925027:10925335:1 gene:ENSCPOG00000023951 transcript:ENSCPOT00000024265	K17	1	1146	4392	26.0929
ENSCPOP00000015632	pep:novel scaffold:cavPor3:scaffold_2:10925027:10925335:1 gene:ENSCPOG00000023951 transcript:ENSCPOT00000024265	K6	1	662	4392	15.0729
ENSCPOP00000015741	pep:novel scaffold:cavPor3:scaffold_11:49308715:49335199:1 gene:ENSCPOG00000001395 transcript:ENSCPOT00000001414	K735	1	3	3	100	Yes
ENSCPOP00000015742	pep:novel scaffold:cavPor3:scaffold_43:7663463:7696221:1 gene:ENSCPOG00000024229 transcript:ENSCPOT00000020193	K240	1	758	1456	52.0604	Yes
ENSCPOP00000015742	pep:novel scaffold:cavPor3:scaffold_43:7663463:7696221:1 gene:ENSCPOG00000024229 transcript:ENSCPOT00000020193	K184	1	359	1456	24.6566
ENSCPOP00000015742	pep:novel scaffold:cavPor3:scaffold_43:7663463:7696221:1 gene:ENSCPOG00000024229 transcript:ENSCPOT00000020193	K127	1	135	1456	9.27198
ENSCPOP00000015742	pep:novel scaffold:cavPor3:scaffold_43:7663463:7696221:1 gene:ENSCPOG00000024229 transcript:ENSCPOT00000020193	K80	1	87	1456	5.97527
ENSCPOP00000015742	pep:novel scaffold:cavPor3:scaffold_43:7663463:7696221:1 gene:ENSCPOG00000024229 transcript:ENSCPOT00000020193	K191	1	50	1456	3.43407
ENSCPOP00000015742	pep:novel scaffold:cavPor3:scaffold_43:7663463:7696221:1 gene:ENSCPOG00000024229 transcript:ENSCPOT00000020193	K178	1	35	1456	2.40385
ENSCPOP00000015742	pep:novel scaffold:cavPor3:scaffold_43:7663463:7696221:1 gene:ENSCPOG00000024229 transcript:ENSCPOT00000020193	K86	1	20	1456	1.37363
ENSCPOP00000015742	pep:novel scaffold:cavPor3:scaffold_43:7663463:7696221:1 gene:ENSCPOG00000024229 transcript:ENSCPOT00000020193	K211	1	11	1456	0.755495
ENSCPOP00000015742	pep:novel scaffold:cavPor3:scaffold_43:7663463:7696221:1 gene:ENSCPOG00000024229 transcript:ENSCPOT00000020193	K126	0.07	1	1456	0.0686813
ENSCPOP00000015745	pep:novel scaffold:cavPor3:scaffold_10:16764342:16768514:1 gene:ENSCPOG00000023214 transcript:ENSCPOT00000026922	K58	1	6	7	85.7143	Yes
ENSCPOP00000015745	pep:novel scaffold:cavPor3:scaffold_10:16764342:16768514:1 gene:ENSCPOG00000023214 transcript:ENSCPOT00000026922	K63	1	1	7	14.2857
ENSCPOP00000015876	pep:novel scaffold:cavPor3:scaffold_26:18357834:18375659:-1 gene:ENSCPOG00000023785 transcript:ENSCPOT00000019791	K132	1	17	31	54.8387	Yes
ENSCPOP00000015876	pep:novel scaffold:cavPor3:scaffold_26:18357834:18375659:-1 gene:ENSCPOG00000023785 transcript:ENSCPOT00000019791	K76	1	14	31	45.1613
ENSCPOP00000016009	pep:novel scaffold:cavPor3:scaffold_42:5264816:5267777:1 gene:ENSCPOG00000021239 transcript:ENSCPOT00000027847	K86	1	1	1	100	Yes
ENSCPOP00000016071	pep:known scaffold:cavPor3:scaffold_9:41594606:41602141:1 gene:ENSCPOG00000023092 transcript:ENSCPOT00000021512	K524	1	637	922	69.0889	Yes
ENSCPOP00000016071	pep:known scaffold:cavPor3:scaffold_9:41594606:41602141:1 gene:ENSCPOG00000023092 transcript:ENSCPOT00000021512	K261	1	101	922	10.9544
ENSCPOP00000016071	pep:known scaffold:cavPor3:scaffold_9:41594606:41602141:1 gene:ENSCPOG00000023092 transcript:ENSCPOT00000021512	K133	1	94	922	10.1952
ENSCPOP00000016071	pep:known scaffold:cavPor3:scaffold_9:41594606:41602141:1 gene:ENSCPOG00000023092 transcript:ENSCPOT00000021512	K124	1	76	922	8.24295
ENSCPOP00000016071	pep:known scaffold:cavPor3:scaffold_9:41594606:41602141:1 gene:ENSCPOG00000023092 transcript:ENSCPOT00000021512	K487	1	10	922	1.0846
ENSCPOP00000016071	pep:known scaffold:cavPor3:scaffold_9:41594606:41602141:1 gene:ENSCPOG00000023092 transcript:ENSCPOT00000021512	K482	1	3	922	0.32538
ENSCPOP00000016071	pep:known scaffold:cavPor3:scaffold_9:41594606:41602141:1 gene:ENSCPOG00000023092 transcript:ENSCPOT00000021512	K266	0	1	922	0.10846
ENSCPOP00000016138	pep:novel scaffold:cavPor3:scaffold_70:264329:268759:1 gene:ENSCPOG00000020449 transcript:ENSCPOT00000021458	K194	1	56	131	42.7481	Yes
ENSCPOP00000016138	pep:novel scaffold:cavPor3:scaffold_70:264329:268759:1 gene:ENSCPOG00000020449 transcript:ENSCPOT00000021458	K107	1	36	131	27.4809
ENSCPOP00000016138	pep:novel scaffold:cavPor3:scaffold_70:264329:268759:1 gene:ENSCPOG00000020449 transcript:ENSCPOT00000021458	K118	1	18	131	13.7405
ENSCPOP00000016138	pep:novel scaffold:cavPor3:scaffold_70:264329:268759:1 gene:ENSCPOG00000020449 transcript:ENSCPOT00000021458	K132	1	10	131	7.63359
ENSCPOP00000016138	pep:novel scaffold:cavPor3:scaffold_70:264329:268759:1 gene:ENSCPOG00000020449 transcript:ENSCPOT00000021458	K175	1	3	131	2.29008
ENSCPOP00000016138	pep:novel scaffold:cavPor3:scaffold_70:264329:268759:1 gene:ENSCPOG00000020449 transcript:ENSCPOT00000021458	K37	1	3	131	2.29008
ENSCPOP00000016138	pep:novel scaffold:cavPor3:scaffold_70:264329:268759:1 gene:ENSCPOG00000020449 transcript:ENSCPOT00000021458	K178	0.99	3	131	2.29008
ENSCPOP00000016138	pep:novel scaffold:cavPor3:scaffold_70:264329:268759:1 gene:ENSCPOG00000020449 transcript:ENSCPOT00000021458	K38	0.14	2	131	1.52672
ENSCPOP00000016471	pep:novel scaffold:cavPor3:scaffold_80:5809338:5818944:-1 gene:ENSCPOG00000019609 transcript:ENSCPOT00000025445	K242	1	157	299	52.5084	Yes
ENSCPOP00000016471	pep:novel scaffold:cavPor3:scaffold_80:5809338:5818944:-1 gene:ENSCPOG00000019609 transcript:ENSCPOT00000025445	K307	1	27	299	9.0301
ENSCPOP00000016471	pep:novel scaffold:cavPor3:scaffold_80:5809338:5818944:-1 gene:ENSCPOG00000019609 transcript:ENSCPOT00000025445	K15	1	24	299	8.02676
ENSCPOP00000016471	pep:novel scaffold:cavPor3:scaffold_80:5809338:5818944:-1 gene:ENSCPOG00000019609 transcript:ENSCPOT00000025445	K259	1	20	299	6.68896
ENSCPOP00000016471	pep:novel scaffold:cavPor3:scaffold_80:5809338:5818944:-1 gene:ENSCPOG00000019609 transcript:ENSCPOT00000025445	K116	1	17	299	5.68562
ENSCPOP00000016471	pep:novel scaffold:cavPor3:scaffold_80:5809338:5818944:-1 gene:ENSCPOG00000019609 transcript:ENSCPOT00000025445	K101	1	14	299	4.68227
ENSCPOP00000016471	pep:novel scaffold:cavPor3:scaffold_80:5809338:5818944:-1 gene:ENSCPOG00000019609 transcript:ENSCPOT00000025445	K41	1	12	299	4.01338
ENSCPOP00000016471	pep:novel scaffold:cavPor3:scaffold_80:5809338:5818944:-1 gene:ENSCPOG00000019609 transcript:ENSCPOT00000025445	K265	1	6	299	2.00669
ENSCPOP00000016471	pep:novel scaffold:cavPor3:scaffold_80:5809338:5818944:-1 gene:ENSCPOG00000019609 transcript:ENSCPOT00000025445	K298	1	6	299	2.00669
ENSCPOP00000016471	pep:novel scaffold:cavPor3:scaffold_80:5809338:5818944:-1 gene:ENSCPOG00000019609 transcript:ENSCPOT00000025445	K304	1	5	299	1.67224
ENSCPOP00000016471	pep:novel scaffold:cavPor3:scaffold_80:5809338:5818944:-1 gene:ENSCPOG00000019609 transcript:ENSCPOT00000025445	K32	1	4	299	1.33779
ENSCPOP00000016471	pep:novel scaffold:cavPor3:scaffold_80:5809338:5818944:-1 gene:ENSCPOG00000019609 transcript:ENSCPOT00000025445	K369	0.8	3	299	1.00334
ENSCPOP00000016471	pep:novel scaffold:cavPor3:scaffold_80:5809338:5818944:-1 gene:ENSCPOG00000019609 transcript:ENSCPOT00000025445	K247	1	2	299	0.668896
ENSCPOP00000016471	pep:novel scaffold:cavPor3:scaffold_80:5809338:5818944:-1 gene:ENSCPOG00000019609 transcript:ENSCPOT00000025445	K107	1	1	299	0.334448
ENSCPOP00000016471	pep:novel scaffold:cavPor3:scaffold_80:5809338:5818944:-1 gene:ENSCPOG00000019609 transcript:ENSCPOT00000025445	K266	0	1	299	0.334448
ENSCPOP00000016731	pep:novel scaffold:cavPor3:scaffold_2:10917407:10917787:-1 gene:ENSCPOG00000020265 transcript:ENSCPOT00000025200	K17	1	295	1141	25.8545	Yes
ENSCPOP00000016731	pep:novel scaffold:cavPor3:scaffold_2:10917407:10917787:-1 gene:ENSCPOG00000020265 transcript:ENSCPOT00000025200	K16	1	294	1141	25.7669
ENSCPOP00000016731	pep:novel scaffold:cavPor3:scaffold_2:10917407:10917787:-1 gene:ENSCPOG00000020265 transcript:ENSCPOT00000025200	K13	1	277	1141	24.277
ENSCPOP00000016731	pep:novel scaffold:cavPor3:scaffold_2:10917407:10917787:-1 gene:ENSCPOG00000020265 transcript:ENSCPOT00000025200	K21	1	157	1141	13.7599
ENSCPOP00000016731	pep:novel scaffold:cavPor3:scaffold_2:10917407:10917787:-1 gene:ENSCPOG00000020265 transcript:ENSCPOT00000025200	K12	1	101	1141	8.85188
ENSCPOP00000016731	pep:novel scaffold:cavPor3:scaffold_2:10917407:10917787:-1 gene:ENSCPOG00000020265 transcript:ENSCPOT00000025200	K109	1	10	1141	0.876424
ENSCPOP00000016731	pep:novel scaffold:cavPor3:scaffold_2:10917407:10917787:-1 gene:ENSCPOG00000020265 transcript:ENSCPOT00000025200	K6	1	5	1141	0.438212
ENSCPOP00000016731	pep:novel scaffold:cavPor3:scaffold_2:10917407:10917787:-1 gene:ENSCPOG00000020265 transcript:ENSCPOT00000025200	K121	1	1	1141	0.0876424
ENSCPOP00000016731	pep:novel scaffold:cavPor3:scaffold_2:10917407:10917787:-1 gene:ENSCPOG00000020265 transcript:ENSCPOT00000025200	K117	1	1	1141	0.0876424
ENSCPOP00000016787	pep:novel scaffold:cavPor3:scaffold_4:3463966:3469793:1 gene:ENSCPOG00000024082 transcript:ENSCPOT00000019892	K22	1	11	11	100	Yes
ENSCPOP00000016987	pep:novel scaffold:cavPor3:scaffold_104:3179479:3187399:1 gene:ENSCPOG00000002588 transcript:ENSCPOT00000002622	K389	1	137	266	51.5038	Yes
ENSCPOP00000016987	pep:novel scaffold:cavPor3:scaffold_104:3179479:3187399:1 gene:ENSCPOG00000002588 transcript:ENSCPOT00000002622	K130	1	45	266	16.9173
ENSCPOP00000016987	pep:novel scaffold:cavPor3:scaffold_104:3179479:3187399:1 gene:ENSCPOG00000002588 transcript:ENSCPOT00000002622	K125	1	24	266	9.02256
ENSCPOP00000016987	pep:novel scaffold:cavPor3:scaffold_104:3179479:3187399:1 gene:ENSCPOG00000002588 transcript:ENSCPOT00000002622	K352	1	18	266	6.76692
ENSCPOP00000016987	pep:novel scaffold:cavPor3:scaffold_104:3179479:3187399:1 gene:ENSCPOG00000002588 transcript:ENSCPOT00000002622	K192	0.84	7	266	2.63158
ENSCPOP00000016987	pep:novel scaffold:cavPor3:scaffold_104:3179479:3187399:1 gene:ENSCPOG00000002588 transcript:ENSCPOT00000002622	K359	1	6	266	2.25564
ENSCPOP00000016987	pep:novel scaffold:cavPor3:scaffold_104:3179479:3187399:1 gene:ENSCPOG00000002588 transcript:ENSCPOT00000002622	K387	0.91	6	266	2.25564
ENSCPOP00000016987	pep:novel scaffold:cavPor3:scaffold_104:3179479:3187399:1 gene:ENSCPOG00000002588 transcript:ENSCPOT00000002622	K364	1	5	266	1.8797
ENSCPOP00000016987	pep:novel scaffold:cavPor3:scaffold_104:3179479:3187399:1 gene:ENSCPOG00000002588 transcript:ENSCPOT00000002622	K202	1	4	266	1.50376
ENSCPOP00000016987	pep:novel scaffold:cavPor3:scaffold_104:3179479:3187399:1 gene:ENSCPOG00000002588 transcript:ENSCPOT00000002622	K472	1	3	266	1.12782
ENSCPOP00000016987	pep:novel scaffold:cavPor3:scaffold_104:3179479:3187399:1 gene:ENSCPOG00000002588 transcript:ENSCPOT00000002622	K249	1	3	266	1.12782
ENSCPOP00000016987	pep:novel scaffold:cavPor3:scaffold_104:3179479:3187399:1 gene:ENSCPOG00000002588 transcript:ENSCPOT00000002622	K191	1	2	266	0.75188
ENSCPOP00000016987	pep:novel scaffold:cavPor3:scaffold_104:3179479:3187399:1 gene:ENSCPOG00000002588 transcript:ENSCPOT00000002622	K250	0.5	2	266	0.75188
ENSCPOP00000016987	pep:novel scaffold:cavPor3:scaffold_104:3179479:3187399:1 gene:ENSCPOG00000002588 transcript:ENSCPOT00000002622	K91	1	1	266	0.37594
ENSCPOP00000016987	pep:novel scaffold:cavPor3:scaffold_104:3179479:3187399:1 gene:ENSCPOG00000002588 transcript:ENSCPOT00000002622	K468	1	1	266	0.37594
ENSCPOP00000016987	pep:novel scaffold:cavPor3:scaffold_104:3179479:3187399:1 gene:ENSCPOG00000002588 transcript:ENSCPOT00000002622	K417	0.5	1	266	0.37594
ENSCPOP00000016987	pep:novel scaffold:cavPor3:scaffold_104:3179479:3187399:1 gene:ENSCPOG00000002588 transcript:ENSCPOT00000002622	K416	0	1	266	0.37594
ENSCPOP00000017061	pep:novel scaffold:cavPor3:scaffold_27:3315212:3324490:1 gene:ENSCPOG00000026132 transcript:ENSCPOT00000021870	K609	1	121	197	61.4213	Yes
ENSCPOP00000017061	pep:novel scaffold:cavPor3:scaffold_27:3315212:3324490:1 gene:ENSCPOG00000026132 transcript:ENSCPOT00000021870	K281	1	41	197	20.8122
ENSCPOP00000017061	pep:novel scaffold:cavPor3:scaffold_27:3315212:3324490:1 gene:ENSCPOG00000026132 transcript:ENSCPOT00000021870	K480	1	26	197	13.198
ENSCPOP00000017061	pep:novel scaffold:cavPor3:scaffold_27:3315212:3324490:1 gene:ENSCPOG00000026132 transcript:ENSCPOT00000021870	K390	1	8	197	4.06091
ENSCPOP00000017061	pep:novel scaffold:cavPor3:scaffold_27:3315212:3324490:1 gene:ENSCPOG00000026132 transcript:ENSCPOT00000021870	K268	1	1	197	0.507614
ENSCPOP00000017103	pep:known scaffold:cavPor3:scaffold_60:10525123:10534088:1 gene:ENSCPOG00000000378 transcript:ENSCPOT00000026680	K63	1	861	1263	68.171	Yes
ENSCPOP00000017103	pep:known scaffold:cavPor3:scaffold_60:10525123:10534088:1 gene:ENSCPOG00000000378 transcript:ENSCPOT00000026680	K125	1	300	1263	23.753
ENSCPOP00000017103	pep:known scaffold:cavPor3:scaffold_60:10525123:10534088:1 gene:ENSCPOG00000000378 transcript:ENSCPOT00000026680	K117	1	77	1263	6.0966
ENSCPOP00000017103	pep:known scaffold:cavPor3:scaffold_60:10525123:10534088:1 gene:ENSCPOG00000000378 transcript:ENSCPOT00000026680	K127	1	14	1263	1.10847
ENSCPOP00000017103	pep:known scaffold:cavPor3:scaffold_60:10525123:10534088:1 gene:ENSCPOG00000000378 transcript:ENSCPOT00000026680	K70	1	8	1263	0.633413
ENSCPOP00000017103	pep:known scaffold:cavPor3:scaffold_60:10525123:10534088:1 gene:ENSCPOG00000000378 transcript:ENSCPOT00000026680	K197	1	3	1263	0.23753
ENSCPOP00000017287	pep:novel scaffold:cavPor3:scaffold_7:51658761:51669793:1 gene:ENSCPOG00000025939 transcript:ENSCPOT00000020784	K127	1	10	13	76.9231	Yes
ENSCPOP00000017287	pep:novel scaffold:cavPor3:scaffold_7:51658761:51669793:1 gene:ENSCPOG00000025939 transcript:ENSCPOT00000020784	K44	1	3	13	23.0769
ENSCPOP00000017464	pep:novel scaffold:cavPor3:scaffold_38:20476612:20477174:1 gene:ENSCPOG00000020380 transcript:ENSCPOT00000027756	K17	1	16	18	88.8889	Yes
ENSCPOP00000017464	pep:novel scaffold:cavPor3:scaffold_38:20476612:20477174:1 gene:ENSCPOG00000020380 transcript:ENSCPOT00000027756	K46	1	2	18	11.1111
ENSCPOP00000017692	pep:known scaffold:cavPor3:scaffold_107:691824:695600:-1 gene:ENSCPOG00000026350 transcript:ENSCPOT00000027490	K192	1	11	16	68.75	Yes
ENSCPOP00000017692	pep:known scaffold:cavPor3:scaffold_107:691824:695600:-1 gene:ENSCPOG00000026350 transcript:ENSCPOT00000027490	K257	1	2	16	12.5
ENSCPOP00000017692	pep:known scaffold:cavPor3:scaffold_107:691824:695600:-1 gene:ENSCPOG00000026350 transcript:ENSCPOT00000027490	K140	1	1	16	6.25
ENSCPOP00000017692	pep:known scaffold:cavPor3:scaffold_107:691824:695600:-1 gene:ENSCPOG00000026350 transcript:ENSCPOT00000027490	K332	1	1	16	6.25
ENSCPOP00000017692	pep:known scaffold:cavPor3:scaffold_107:691824:695600:-1 gene:ENSCPOG00000026350 transcript:ENSCPOT00000027490	K105	1	1	16	6.25
ENSCPOP00000017704	pep:novel scaffold:cavPor3:scaffold_81:3026472:3041363:-1 gene:ENSCPOG00000023840 transcript:ENSCPOT00000025252	K224	1	100	133	75.188	Yes
ENSCPOP00000017704	pep:novel scaffold:cavPor3:scaffold_81:3026472:3041363:-1 gene:ENSCPOG00000023840 transcript:ENSCPOT00000025252	K20	1	22	133	16.5414
ENSCPOP00000017704	pep:novel scaffold:cavPor3:scaffold_81:3026472:3041363:-1 gene:ENSCPOG00000023840 transcript:ENSCPOT00000025252	K61	1	8	133	6.01504
ENSCPOP00000017704	pep:novel scaffold:cavPor3:scaffold_81:3026472:3041363:-1 gene:ENSCPOG00000023840 transcript:ENSCPOT00000025252	K28	1	3	133	2.25564
ENSCPOP00000017707	pep:novel scaffold:cavPor3:scaffold_81:2011324:2012236:1 gene:ENSCPOG00000022324 transcript:ENSCPOT00000026976	K33	1	33	33	100	Yes
ENSCPOP00000017738	pep:novel scaffold:cavPor3:scaffold_44:4240293:4252180:-1 gene:ENSCPOG00000020159 transcript:ENSCPOT00000025371	K85	1	56	77	72.7273	Yes
ENSCPOP00000017738	pep:novel scaffold:cavPor3:scaffold_44:4240293:4252180:-1 gene:ENSCPOG00000020159 transcript:ENSCPOT00000025371	K81	1	21	77	27.2727
ENSCPOP00000017860	pep:novel scaffold:cavPor3:scaffold_10:17131108:17133201:1 gene:ENSCPOG00000024878 transcript:ENSCPOT00000027660	K84	0.09	2	2	100	Yes
ENSCPOP00000018421	pep:novel scaffold:cavPor3:scaffold_119:842252:849252:1 gene:ENSCPOG00000022072 transcript:ENSCPOT00000015086	K179	1	4	4	100	Yes
ENSCPOP00000018477	pep:novel scaffold:cavPor3:scaffold_10:26104234:26115917:1 gene:ENSCPOG00000021886 transcript:ENSCPOT00000026625	K78	1	83	215	38.6047	Yes
ENSCPOP00000018477	pep:novel scaffold:cavPor3:scaffold_10:26104234:26115917:1 gene:ENSCPOG00000021886 transcript:ENSCPOT00000026625	K262	1	66	215	30.6977
ENSCPOP00000018477	pep:novel scaffold:cavPor3:scaffold_10:26104234:26115917:1 gene:ENSCPOG00000021886 transcript:ENSCPOT00000026625	K58	1	35	215	16.2791
ENSCPOP00000018477	pep:novel scaffold:cavPor3:scaffold_10:26104234:26115917:1 gene:ENSCPOG00000021886 transcript:ENSCPOT00000026625	K67	1	20	215	9.30233
ENSCPOP00000018477	pep:novel scaffold:cavPor3:scaffold_10:26104234:26115917:1 gene:ENSCPOG00000021886 transcript:ENSCPOT00000026625	K85	1	8	215	3.72093
ENSCPOP00000018477	pep:novel scaffold:cavPor3:scaffold_10:26104234:26115917:1 gene:ENSCPOG00000021886 transcript:ENSCPOT00000026625	K155	1	3	215	1.39535
ENSCPOP00000018791	pep:novel scaffold:cavPor3:scaffold_309:283778:287163:1 gene:ENSCPOG00000022243 transcript:ENSCPOT00000019606	K87	1	131	258	50.7752	Yes
ENSCPOP00000018791	pep:novel scaffold:cavPor3:scaffold_309:283778:287163:1 gene:ENSCPOG00000022243 transcript:ENSCPOT00000019606	K78	1	69	258	26.7442
ENSCPOP00000018791	pep:novel scaffold:cavPor3:scaffold_309:283778:287163:1 gene:ENSCPOG00000022243 transcript:ENSCPOT00000019606	K65	1	29	258	11.2403
ENSCPOP00000018791	pep:novel scaffold:cavPor3:scaffold_309:283778:287163:1 gene:ENSCPOG00000022243 transcript:ENSCPOT00000019606	K63	1	23	258	8.91473
ENSCPOP00000018791	pep:novel scaffold:cavPor3:scaffold_309:283778:287163:1 gene:ENSCPOG00000022243 transcript:ENSCPOT00000019606	K67	0.82	5	258	1.93798
ENSCPOP00000018791	pep:novel scaffold:cavPor3:scaffold_309:283778:287163:1 gene:ENSCPOG00000022243 transcript:ENSCPOT00000019606	K85	0.58	1	258	0.387597
ENSCPOP00000018880	pep:novel scaffold:cavPor3:scaffold_7:59059204:59078481:1 gene:ENSCPOG00000026990 transcript:ENSCPOT00000027372	K132	1	12	12	100	Yes
ENSCPOP00000018962	pep:known scaffold:cavPor3:scaffold_0:32608413:32612491:-1 gene:ENSCPOG00000025732 transcript:ENSCPOT00000024303	K40	1	35	36	97.2222	Yes
ENSCPOP00000018962	pep:known scaffold:cavPor3:scaffold_0:32608413:32612491:-1 gene:ENSCPOG00000025732 transcript:ENSCPOT00000024303	K17	1	1	36	2.77778
ENSCPOP00000019052	pep:novel scaffold:cavPor3:scaffold_30:1810086:1811303:1 gene:ENSCPOG00000023568 transcript:ENSCPOT00000023996	K118	1	29	35	82.8571	Yes
ENSCPOP00000019052	pep:novel scaffold:cavPor3:scaffold_30:1810086:1811303:1 gene:ENSCPOG00000023568 transcript:ENSCPOT00000023996	K193	1	5	35	14.2857
ENSCPOP00000019052	pep:novel scaffold:cavPor3:scaffold_30:1810086:1811303:1 gene:ENSCPOG00000023568 transcript:ENSCPOT00000023996	K200	0	1	35	2.85714
ENSCPOP00000019095	pep:known scaffold:cavPor3:scaffold_30:1707717:1720671:1 gene:ENSCPOG00000010145 transcript:ENSCPOT00000025759	K314	1	323	1463	22.0779	Yes
ENSCPOP00000019095	pep:known scaffold:cavPor3:scaffold_30:1707717:1720671:1 gene:ENSCPOG00000010145 transcript:ENSCPOT00000025759	K307	1	174	1463	11.8934
ENSCPOP00000019095	pep:known scaffold:cavPor3:scaffold_30:1707717:1720671:1 gene:ENSCPOG00000010145 transcript:ENSCPOT00000025759	K185	1	160	1463	10.9364
ENSCPOP00000019095	pep:known scaffold:cavPor3:scaffold_30:1707717:1720671:1 gene:ENSCPOG00000010145 transcript:ENSCPOT00000025759	K335	1	155	1463	10.5947
ENSCPOP00000019095	pep:known scaffold:cavPor3:scaffold_30:1707717:1720671:1 gene:ENSCPOG00000010145 transcript:ENSCPOT00000025759	K301	1	141	1463	9.63773
ENSCPOP00000019095	pep:known scaffold:cavPor3:scaffold_30:1707717:1720671:1 gene:ENSCPOG00000010145 transcript:ENSCPOT00000025759	K324	1	120	1463	8.20232
ENSCPOP00000019095	pep:known scaffold:cavPor3:scaffold_30:1707717:1720671:1 gene:ENSCPOG00000010145 transcript:ENSCPOT00000025759	K91	1	96	1463	6.56186
ENSCPOP00000019095	pep:known scaffold:cavPor3:scaffold_30:1707717:1720671:1 gene:ENSCPOG00000010145 transcript:ENSCPOT00000025759	K329	1	85	1463	5.80998
ENSCPOP00000019095	pep:known scaffold:cavPor3:scaffold_30:1707717:1720671:1 gene:ENSCPOG00000010145 transcript:ENSCPOT00000025759	K328	1	69	1463	4.71634
ENSCPOP00000019095	pep:known scaffold:cavPor3:scaffold_30:1707717:1720671:1 gene:ENSCPOG00000010145 transcript:ENSCPOT00000025759	K215	1	39	1463	2.66576
ENSCPOP00000019095	pep:known scaffold:cavPor3:scaffold_30:1707717:1720671:1 gene:ENSCPOG00000010145 transcript:ENSCPOT00000025759	K203	1	38	1463	2.5974
ENSCPOP00000019095	pep:known scaffold:cavPor3:scaffold_30:1707717:1720671:1 gene:ENSCPOG00000010145 transcript:ENSCPOT00000025759	K281	1	30	1463	2.05058
ENSCPOP00000019095	pep:known scaffold:cavPor3:scaffold_30:1707717:1720671:1 gene:ENSCPOG00000010145 transcript:ENSCPOT00000025759	K296	1	19	1463	1.2987
ENSCPOP00000019095	pep:known scaffold:cavPor3:scaffold_30:1707717:1720671:1 gene:ENSCPOG00000010145 transcript:ENSCPOT00000025759	K165	1	12	1463	0.820232
ENSCPOP00000019095	pep:known scaffold:cavPor3:scaffold_30:1707717:1720671:1 gene:ENSCPOG00000010145 transcript:ENSCPOT00000025759	K239	1	2	1463	0.136705
ENSCPOP00000019378	pep:novel scaffold:cavPor3:scaffold_53:9800480:9807357:1 gene:ENSCPOG00000025974 transcript:ENSCPOT00000022467	K77	1	6	6	100	Yes
ENSCPOP00000019510	pep:novel scaffold:cavPor3:scaffold_143:1005745:1006131:1 gene:ENSCPOG00000003879 transcript:ENSCPOT00000003923	K8	1	143	487	29.3634	Yes
ENSCPOP00000019510	pep:novel scaffold:cavPor3:scaffold_143:1005745:1006131:1 gene:ENSCPOG00000003879 transcript:ENSCPOT00000003923	K12	1	143	487	29.3634
ENSCPOP00000019510	pep:novel scaffold:cavPor3:scaffold_143:1005745:1006131:1 gene:ENSCPOG00000003879 transcript:ENSCPOT00000003923	K5	1	142	487	29.1581
ENSCPOP00000019510	pep:novel scaffold:cavPor3:scaffold_143:1005745:1006131:1 gene:ENSCPOG00000003879 transcript:ENSCPOT00000003923	K14	1	59	487	12.115
ENSCPOP00000019902	pep:novel scaffold:cavPor3:scaffold_98:4333064:4340592:1 gene:ENSCPOG00000024832 transcript:ENSCPOT00000028027	K87	1	17	29	58.6207	Yes
ENSCPOP00000019902	pep:novel scaffold:cavPor3:scaffold_98:4333064:4340592:1 gene:ENSCPOG00000024832 transcript:ENSCPOT00000028027	K113	1	11	29	37.931
ENSCPOP00000019902	pep:novel scaffold:cavPor3:scaffold_98:4333064:4340592:1 gene:ENSCPOG00000024832 transcript:ENSCPOT00000028027	K72	0.01	1	29	3.44828
ENSCPOP00000020345	pep:novel scaffold:cavPor3:scaffold_38:18957559:18973731:1 gene:ENSCPOG00000019753 transcript:ENSCPOT00000026554	K126	1	89	189	47.0899	Yes
ENSCPOP00000020345	pep:novel scaffold:cavPor3:scaffold_38:18957559:18973731:1 gene:ENSCPOG00000019753 transcript:ENSCPOT00000026554	K42	1	77	189	40.7407
ENSCPOP00000020345	pep:novel scaffold:cavPor3:scaffold_38:18957559:18973731:1 gene:ENSCPOG00000019753 transcript:ENSCPOT00000026554	K36	1	23	189	12.1693
ENSCPOP00000020424	pep:novel scaffold:cavPor3:scaffold_44:15161369:15170025:1 gene:ENSCPOG00000025703 transcript:ENSCPOT00000028229	K434	1	7	7	100	Yes
ENSCPOP00000020451	pep:novel scaffold:cavPor3:scaffold_38:20382197:20382577:-1 gene:ENSCPOG00000027599 transcript:ENSCPOT00000024283	K13	1	45	167	26.9461	Yes
ENSCPOP00000020451	pep:novel scaffold:cavPor3:scaffold_38:20382197:20382577:-1 gene:ENSCPOG00000027599 transcript:ENSCPOT00000024283	K16	1	42	167	25.1497
ENSCPOP00000020451	pep:novel scaffold:cavPor3:scaffold_38:20382197:20382577:-1 gene:ENSCPOG00000027599 transcript:ENSCPOT00000024283	K17	1	35	167	20.9581
ENSCPOP00000020451	pep:novel scaffold:cavPor3:scaffold_38:20382197:20382577:-1 gene:ENSCPOG00000027599 transcript:ENSCPOT00000024283	K21	1	21	167	12.5749
ENSCPOP00000020451	pep:novel scaffold:cavPor3:scaffold_38:20382197:20382577:-1 gene:ENSCPOG00000027599 transcript:ENSCPOT00000024283	K12	1	16	167	9.58084
ENSCPOP00000020451	pep:novel scaffold:cavPor3:scaffold_38:20382197:20382577:-1 gene:ENSCPOG00000027599 transcript:ENSCPOT00000024283	K109	1	8	167	4.79042
ENSCPOP00000020666	pep:novel scaffold:cavPor3:scaffold_320:107532:109518:1 gene:ENSCPOG00000020167 transcript:ENSCPOT00000024641	K136	1	160	177	90.3955	Yes
ENSCPOP00000020666	pep:novel scaffold:cavPor3:scaffold_320:107532:109518:1 gene:ENSCPOG00000020167 transcript:ENSCPOT00000024641	K165	1	17	177	9.60452
ENSCPOP00000020800	pep:novel scaffold:cavPor3:scaffold_10:5237655:5241526:-1 gene:ENSCPOG00000023956 transcript:ENSCPOT00000022727	K68	1	2	2	100	Yes
